# Supplementary material
Source: Research Square preprint supplement (doi:10.21203/rs.3.rs-10195508/v1)
Supplement: Supplementary file 1 [file 699c8a1b48d9945fb691bd53.xlsx]

## Sheet: Monte Carlo Simulation Results
		Natural History
	Outputs	Outpatient																																				ED
		LRTI																																				LRTI
Iteration	Age (Months)	0	1	2	3	4	5	6	7	8	9	10	11	12	13	14	15	16	17	18	19	20	21	22	23	24	25	26	27	28	29	30	31	32	33	34	35	0	1	2	3	4	5	6	7	8	9	10	11
1		54033.5	53742.1	52209.5	51376.1	55031	54881.2	7847.21	7998.78	8068.19	8068.34	8068.95	8117.76	10917.4	10084.8	9059.31	9808.61	10427	11373.4	11604.5	11032.2	10703.5	11075	10867.9	10423.3	6176.27	6176.27	6176.27	6176.27	6176.27	6176.27	6176.27	6176.27	6176.27	6176.27	6176.27	6176.27	7160.48	7069.92	6939.71	7103.96	7188.07	7105.56	5169.28	5164.83	5166.92	5172.68	5168.99	5166.3
2		56478	55535.4	60386.4	70622.5	70943.5	65499.6	57323.8	56422.9	49758.5	52397.7	63461.5	60285.4	49981.6	42188	27698.1	43592.7	48796	27969.8	31573.9	44185.5	63803	50140.4	63539.7	64453.5	20662.5	20662.5	20662.5	20662.5	20662.5	20662.5	20662.5	20662.5	20662.5	20662.5	20662.5	20662.5	18459.1	19132.5	19531.4	19928.7	19212.9	18975.5	2137.17	2125.73	2137.48	2137.15	2127.15	2125.69
3		32345.2	32980.8	32670.3	34094	39295.1	34499.2	455.959	498.794	507.681	482.274	452.199	466.307	337.232	197.953	185.353	239.545	300.282	311.814	387.943	449.96	317.172	350.482	329.522	237.141	212.806	212.806	212.806	212.806	212.806	212.806	212.806	212.806	212.806	212.806	212.806	212.806	13028.5	13535.3	14393	14621.8	15006.4	15116.1	7039.06	7028.9	7023.99	7018.24	7026.28	7025.47
4		38414.8	39475.1	36501.8	32815.9	35329.5	38628.3	18866.4	18549.9	19332.8	19168.9	19716.7	18782.4	8225.78	9978.56	10409.9	12806.4	13523	17727	25626.7	11523.8	11924.5	21096	9813.88	8209.48	6467.06	6467.06	6467.06	6467.06	6467.06	6467.06	6467.06	6467.06	6467.06	6467.06	6467.06	6467.06	20534.6	21242.2	22934.9	21624.6	21413.2	22963	9417.07	9371.77	9364.03	9408.97	9479.04	9444.25
5		41354.2	38756.1	39069.3	40060.6	36713.4	38825.3	34034	33303.7	32416.2	33315.5	33764.9	31947.7	17870.7	18147.5	23168.5	20339.3	17574.7	21277.6	32521.4	49031.3	43323.2	32112.1	21994.8	22654.1	15722.3	15722.3	15722.3	15722.3	15722.3	15722.3	15722.3	15722.3	15722.3	15722.3	15722.3	15722.3	16335.3	15929.8	15899.2	17119.7	17698.3	16652.4	3011.92	3020.45	3029.03	3029.53	3031.92	3015.71
6		38688.4	39662.3	41576.6	37022.5	35432	37629.4	42439.2	43359.3	42765.3	42810.6	44898.1	45373.2	40480.5	44758.5	46238.2	45794	42206.2	41993.9	43936.9	39629.5	46464.6	49744.7	44446.7	45794.9	23050.9	23050.9	23050.9	23050.9	23050.9	23050.9	23050.9	23050.9	23050.9	23050.9	23050.9	23050.9	11139.5	11214.8	11064.7	10876.3	11092.7	11243.4	5418.29	5418.13	5415.3	5409.62	5411.59	5410.05
7		21504.4	22635	22949.3	21465.1	22035	21771	35903.3	36494.2	37672.2	37144.4	39032.7	40659.4	34363.2	33193.5	28396.8	25577.8	29980.8	27888.5	26238.3	36540.2	45759.4	43073.8	37478.2	27511.5	15760.6	15760.6	15760.6	15760.6	15760.6	15760.6	15760.6	15760.6	15760.6	15760.6	15760.6	15760.6	15942.2	15785.3	16204.3	16360.2	17531	17609.7	13948.5	13973.5	13924.6	13902.5	13871.3	13936.2
8		23652	22938.8	22952.9	24088.3	23285.8	23543	16006.4	15906.4	15706.3	15245.3	15683.5	16736.8	13905.9	9251.66	8778.82	10115.9	16800.6	15613.8	10851.7	10507.5	12037.6	12315.8	13862.6	13129.3	6066.81	6066.81	6066.81	6066.81	6066.81	6066.81	6066.81	6066.81	6066.81	6066.81	6066.81	6066.81	17068	16980.9	17383.1	16824.6	15773.3	16179	6233.49	6263.26	6270.04	6254.42	6251.2	6245.1
9		46500.5	48604.1	47361.4	42621	43837.9	48252.9	9128.13	8842.65	8526.77	8307.44	8260.92	8475.02	8390.41	8349.4	7368.02	6865.79	7649.14	7436.55	7890.54	9362.32	7641.87	10069.4	10220	8470.26	5193.75	5193.75	5193.75	5193.75	5193.75	5193.75	5193.75	5193.75	5193.75	5193.75	5193.75	5193.75	17855.3	17646.2	17586.9	17153.6	17434.3	19583.9	6330.53	6302.52	6306.9	6322.56	6337.6	6319.82
10		41730.2	42490.4	38921	37663.9	40222.8	41209.1	50651.7	51222.1	47758.5	47576	49194.7	47349.2	30007.2	44271.7	41282.9	23796.6	25584.1	23153.5	26096.2	33722.1	45028.3	42215.2	25375.3	25776	14190.7	14190.7	14190.7	14190.7	14190.7	14190.7	14190.7	14190.7	14190.7	14190.7	14190.7	14190.7	6770.53	6480.55	6086.27	6193.89	6269.11	6243.41	5048.01	5059.55	5057.76	5054.92	5052.31	5058.6
11		31755.1	31642.2	31295.8	31721.3	32043	31096.9	255.843	256.432	254.046	257.396	257.123	263.587	289.933	281.612	267.12	262.815	257.289	266.491	306.539	274.715	258.822	266.426	256.241	270.255	189.568	189.568	189.568	189.568	189.568	189.568	189.568	189.568	189.568	189.568	189.568	189.568	9533.86	9770.23	10406.9	9741.39	9130.18	9334.49	7832.69	7840.58	7855.89	7880.5	7849.82	7838.33
12		46455.3	47355.7	45625.2	43968.1	42607.8	42115.4	39342	39208.2	41525.1	41784	40058.9	41971.7	44888.8	45961.4	50725.8	37747.9	37432.9	39442.7	41866.7	52605.2	43678.2	39465.8	44175.4	48701.4	28107.1	28107.1	28107.1	28107.1	28107.1	28107.1	28107.1	28107.1	28107.1	28107.1	28107.1	28107.1	10435.7	10546.8	10700.1	10960.7	10800.2	10379.4	5788.34	5788.12	5783.97	5778.1	5778.35	5772.79
13		23231.5	24807.8	24017.1	20091.1	20834.5	23170	53920.2	58010.3	60351.5	54134.5	54702.2	55637.6	29348.7	36236.8	66106.7	83697.1	70190	46767.9	35573.9	30242.1	46387	57107.6	52244.4	54165.8	17463.7	17463.7	17463.7	17463.7	17463.7	17463.7	17463.7	17463.7	17463.7	17463.7	17463.7	17463.7	5611.45	5526.37	5497.78	5506.78	5514.87	5559.08	9385.31	9376.73	9361.65	9381.21	9404.73	9408.57
14		42787.9	45040.5	43960.4	39755.4	40516.7	39223.8	36799.8	39574.5	40147.6	39014.8	35986.3	36300.5	24251.2	23154.4	27033.3	33233.2	39529.2	29063.5	20355.1	21104.9	23660	21492.2	28599.3	27894.5	8455.01	8455.01	8455.01	8455.01	8455.01	8455.01	8455.01	8455.01	8455.01	8455.01	8455.01	8455.01	16673.7	15940.1	15073.8	16645.3	18465.4	16722	11285.8	11318.8	11230.8	11213	11236.2	11249.9
15		14372.4	14151.3	13770.2	14407.6	14400.5	14416.8	3411.77	3376.57	3396.7	3303.24	3319.52	3462.42	2606.17	1619.37	1707.08	1966.77	1489.2	1534.04	1914.4	2168.7	1715.08	1840.96	1646.71	1346.99	1101.68	1101.68	1101.68	1101.68	1101.68	1101.68	1101.68	1101.68	1101.68	1101.68	1101.68	1101.68	6910.1	7096.1	7570.33	7558.2	7093.69	6870.9	9682.57	9700.43	9715.36	9723.42	9689.9	9678.86
16		54965.7	53443.8	54242.3	55882.2	54528.7	56471.8	1666.84	1565.99	1520.16	1623.06	1546.14	1442.73	1241.79	1093.98	965.484	1524.16	1668.03	1495.73	1578.92	1411.88	1405.81	1589.98	1268.1	1224.09	839.061	839.061	839.061	839.061	839.061	839.061	839.061	839.061	839.061	839.061	839.061	839.061	13517.7	13776.1	15314.6	14773.7	14167.7	14902.6	11377.6	11422.1	11393.1	11363.6	11360.7	11377
17		32243.3	31308.9	31876.9	32482.9	32596	36860.8	1427.56	1250.28	1269.46	1424.84	1543.04	1521.35	1037.48	640.264	742.763	803.937	787.81	842.665	1047.5	1222.93	890.31	721.234	953.296	791.419	628.869	628.869	628.869	628.869	628.869	628.869	628.869	628.869	628.869	628.869	628.869	628.869	14097.6	14166.7	14307.3	14458	14338.1	14127.5	12826.8	12815.7	12830.9	12854.1	12837.3	12830
18		38571	36075.2	36412.5	43099	41283.9	42329.9	23385.8	19335.8	18842.4	19854.2	19132.6	20898.6	15975	9458.69	10161.6	15351.4	19179.9	23634.8	21289.2	12549.1	13735.3	11460.9	9104.79	9486.75	5224.27	5224.27	5224.27	5224.27	5224.27	5224.27	5224.27	5224.27	5224.27	5224.27	5224.27	5224.27	23380.3	22450.8	20618.8	22527.5	23779.8	22773.2	5632.93	5629.23	5622.54	5615.08	5648.97	5635.36
19		29277.5	29153.7	29792.2	29981.1	28317.1	28759.6	15980.3	15109.1	15115.6	15371.7	15280	14624.8	11199.2	25011.6	21453.7	13676.1	14245.7	13938.8	14195.9	13330.1	10416.8	11152.7	12631.2	13531.8	6287.6	6287.6	6287.6	6287.6	6287.6	6287.6	6287.6	6287.6	6287.6	6287.6	6287.6	6287.6	20786.3	20679.4	20771	20888.8	21128.1	21426.7	9358.2	9352.85	9354.37	9358.47	9365.38	9357.05
20		53180.7	58812.7	61279.1	59284.7	60488.3	56145.2	34100.2	32651.3	32293.2	34314.1	37815.1	36583.3	19850.2	22925.1	24968.8	23460.4	22464.2	18325.6	17064.6	16906.5	20238.4	29482.8	21803	16247.2	10853.6	10853.6	10853.6	10853.6	10853.6	10853.6	10853.6	10853.6	10853.6	10853.6	10853.6	10853.6	16158.4	17770.1	18599.4	16435.5	16573	15753.9	12030.6	12102.6	12136.3	12190	12189.4	12129.4
21		25588.8	26385.1	26093.5	25826.5	24945.8	24220.3	255.97	251.446	232.219	237.102	242.066	234.68	116.534	116.717	121.083	147.956	151.605	183.204	141.714	143.191	141.83	135.455	162.891	126.044	80.0055	80.0055	80.0055	80.0055	80.0055	80.0055	80.0055	80.0055	80.0055	80.0055	80.0055	80.0055	10372.2	10297.2	10493.9	10857.7	10525.6	9586.3	7458.13	7475.1	7505.78	7507.27	7505.4	7526.75
22		63955.1	64959.9	62988	62292.6	65210.1	65182.6	42908.6	42947.4	43442.9	43506.6	42889.6	42220.3	45291.6	46508.6	47343.6	49022.4	49973.6	46696	47208	49476	48945.3	47586.8	47342.1	45847.2	26864.9	26864.9	26864.9	26864.9	26864.9	26864.9	26864.9	26864.9	26864.9	26864.9	26864.9	26864.9	11236.6	11294.3	11369.7	11582.2	11633.2	11288.5	2343.64	2342.6	2344.55	2348.11	2347.63	2344.76
23		52285.4	54526	51978.7	45386	46226.6	54733.5	18508.9	17160.3	16901.2	17014.2	15884	16452.9	12475	12834.7	14352.1	13908.3	17935.1	15952.1	12127	9963.39	9869.77	9981.81	10632.2	12845.3	8788.6	8788.6	8788.6	8788.6	8788.6	8788.6	8788.6	8788.6	8788.6	8788.6	8788.6	8788.6	13451.7	13438.4	13633.3	13480.6	13526.4	13311.1	7654.07	7675.38	7645.12	7651.17	7695.03	7686.86
24		55001.8	53261.5	47512	47059.1	49788.8	48620	9059.69	9852.75	10289.1	9371.97	9190.65	9362.79	8602.97	8024.52	5992.82	6812.2	7898.03	6650.43	6008.92	7478.08	8035.57	6797.11	7912.25	10582.5	6271.86	6271.86	6271.86	6271.86	6271.86	6271.86	6271.86	6271.86	6271.86	6271.86	6271.86	6271.86	14171.6	14019.7	13895.5	13964.2	14139.6	14283.4	6369.31	6367.22	6357.82	6360.86	6365.97	6362.46
25		58316.2	59099.4	56719.1	55860.6	57782.6	58301.7	17172.7	17077.5	16804.8	16547.1	16787.8	16908.7	17042.7	17262.7	17928.7	17747.8	17886.3	18516.5	19229	17644.7	17229.6	17630.2	17665	16971.2	9760.23	9760.23	9760.23	9760.23	9760.23	9760.23	9760.23	9760.23	9760.23	9760.23	9760.23	9760.23	12226.6	12268.4	13574.6	14119.2	13760.5	13616.8	7762.36	7777.81	7786.51	7786.61	7796.02	7773.57
26		53349.8	53408.1	59061.2	60662.3	58222.3	56430.8	15254.3	15043.2	16875.4	18798.8	18420.2	16758.6	14478.7	25334.8	34432.7	29706.9	22797.4	13217.2	10196.7	14924.2	16371.4	17263.9	17574.7	14845.4	12947.9	12947.9	12947.9	12947.9	12947.9	12947.9	12947.9	12947.9	12947.9	12947.9	12947.9	12947.9	13998.4	13841.6	14236	13756.4	13482.9	15446.2	13836.9	13701.3	13648.9	13843.9	13800.1	13676.5
27		38531.3	38315	37827.5	37815.8	38451.6	38819.1	21419.4	21529.5	21680.1	21382.5	21762.8	22101.2	25602.5	24470.2	23799.6	23841	23644.3	23684.3	23695.5	23180	24547.2	27514.8	25813.2	25956	14347.2	14347.2	14347.2	14347.2	14347.2	14347.2	14347.2	14347.2	14347.2	14347.2	14347.2	14347.2	14710.7	14823.7	14834.2	14668.2	14693.7	14751	13798	13794.9	13784.4	13784.9	13794.4	13793.5
28		56653.1	48068.4	49785.3	62231.2	62715.9	58062	29747.3	30902.5	31929.7	33841.3	33225.4	31590	20107.2	17915.5	22039.5	25116.2	24724.3	19899.5	20754.4	29295.5	30472.2	21206.7	13091.5	16537.1	24180.8	24180.8	24180.8	24180.8	24180.8	24180.8	24180.8	24180.8	24180.8	24180.8	24180.8	24180.8	16692	16769.8	15925.8	16649.9	17335.7	15735.7	6153.17	6162.14	6172.51	6170.15	6155.15	6171.74
29		46139.3	44837.6	42860.8	47946	51801.7	47231.6	23795	25137.6	27868.9	25859.8	26648.8	28704.8	31305.3	25957.2	30642.5	26689.6	15118.6	16996.7	22062.1	26680.3	26368.8	21630.7	25958.4	21033	10229.1	10229.1	10229.1	10229.1	10229.1	10229.1	10229.1	10229.1	10229.1	10229.1	10229.1	10229.1	18626.9	18358.1	16087.4	15575.8	16708.7	17637.6	4786.05	4780.69	4770.11	4757.71	4772.71	4766.83
30		47345.8	45338.6	45941.4	49857.6	47548.2	44938.3	13481.8	13439.3	13696.1	14839.5	15739.6	14744.9	15679.7	12486.6	5563.43	7031.13	11600.9	10950.9	6611.18	6306.56	6679.85	7616.99	9624.76	12222.9	9011.52	9011.52	9011.52	9011.52	9011.52	9011.52	9011.52	9011.52	9011.52	9011.52	9011.52	9011.52	7725.15	8062.98	8292.62	7688.16	7306.16	7163.25	9776.21	9765.65	9708.04	9794.58	9840.5	9790.45
31		43274.2	44379.8	46953.9	49537.4	52580.4	53325.9	6985.68	6628.11	6312.05	6318.31	6601.15	6378.36	3680.34	4065.19	5095.69	4126.84	3581.57	4679.38	4390.79	4187.47	4273.28	3541.19	3383.78	4318.77	2162.01	2162.01	2162.01	2162.01	2162.01	2162.01	2162.01	2162.01	2162.01	2162.01	2162.01	2162.01	19210.7	19559.6	19841.2	18945.2	19364.2	21451.1	2267.1	2253.79	2259.99	2264.67	2252.02	2259.24
32		37856	39279.7	37250.1	36097.4	39034.5	40452.5	1847.11	1768.31	1666.41	1595.46	1765.44	2024.06	1571.58	1218.45	2208.93	2169.95	1563.34	1151.68	960.557	1517.97	2158.84	1406.85	1022.85	1553.09	1585.43	1585.43	1585.43	1585.43	1585.43	1585.43	1585.43	1585.43	1585.43	1585.43	1585.43	1585.43	20744.1	20984.2	20903.3	20574.6	20596.6	20425.1	10241.8	10248	10268.9	10272.3	10256.4	10247.9
33		40587.7	39199.1	39203.2	42857.8	43324.1	40651.8	12426.7	12583.7	12327.4	12079.1	11998.6	12093	6745.34	6961.63	5855.91	5591.87	6427.22	7449.52	7218.61	8583.35	7358.24	4806.85	4978.72	6737.46	4575.45	4575.45	4575.45	4575.45	4575.45	4575.45	4575.45	4575.45	4575.45	4575.45	4575.45	4575.45	1251.46	1241.67	1245.73	1287.92	1220.86	1328.22	5281.57	5258.45	5251.85	5227.21	5220.61	5212.15
34		50800	51756.7	52562.5	52430.3	51076.4	49707.1	18714.1	18631.4	18534.4	18853.2	19069.6	19247.8	22796.9	21397	22629.8	22709.2	20746.8	20834.4	20649.9	19765.3	19900.4	20653.3	19377.6	19931.7	12955.7	12955.7	12955.7	12955.7	12955.7	12955.7	12955.7	12955.7	12955.7	12955.7	12955.7	12955.7	17329	18066.1	18596.6	18543.3	18268.3	17277.5	7744.85	7775.23	7780.52	7766.15	7778.37	7758.85
35		42639.9	41999.8	41145.5	40908.9	42187.7	44417.7	10185.1	10302.7	10888.4	10444.8	10408.7	10242.8	7142.55	10608.7	11851	8993.64	5633.5	7610.09	9103.52	6378.07	7595.62	6217.19	6515.71	7147.9	3391.47	3391.47	3391.47	3391.47	3391.47	3391.47	3391.47	3391.47	3391.47	3391.47	3391.47	3391.47	13978.6	13650.4	12979	13462.1	13848.3	13551.1	10776.1	10795.9	10804.3	10769.3	10762.3	10780.5
36		13033.1	13247.6	13350.3	13379.2	13838.9	13371.6	6446.38	6515.92	6309.04	6401.42	6503.02	6539.36	3300.92	2938.35	3525.94	3731.01	3408.03	3227.67	2700.33	2425.38	2735.97	2892.31	2759.93	3040.62	2167.24	2167.24	2167.24	2167.24	2167.24	2167.24	2167.24	2167.24	2167.24	2167.24	2167.24	2167.24	16248.2	15830.6	14946.2	14237.9	13099.2	13181.4	7119.05	7141.39	7166.32	7179.36	7179.08	7173.72
37		51173.7	47891.8	47856.7	50265.7	45448	45423.9	1613.12	1642.61	1634.14	1601.7	1624.08	1623.7	833.099	840.416	866.743	663.735	576.853	889.718	829.147	760.533	772.394	732.987	757.911	817.777	811.244	811.244	811.244	811.244	811.244	811.244	811.244	811.244	811.244	811.244	811.244	811.244	10539.4	10605.5	10376	10340.6	10302.5	10029.7	14245.5	14232.9	14309.8	14312	14291.9	14310.4
38		20381.4	20300.6	19388.7	19281.7	20765.5	21661.1	9620.75	9098.95	8963.55	9195.83	9522.83	9272.9	3983.94	4333.74	4916.81	5131.2	5100.71	5591.31	4523.91	3145.37	3508.11	5640.21	4895.69	4347.06	2883.9	2883.9	2883.9	2883.9	2883.9	2883.9	2883.9	2883.9	2883.9	2883.9	2883.9	2883.9	15209	15255.1	15161.4	15689.8	16277.8	15403	9088.8	9107.76	9089.12	9082.34	9066.85	9065.59
39		54667.4	55163.2	54939.2	54823	54273.2	53557.1	58502	58329.3	58235.7	59074.8	57693.4	57448.3	67435.8	65223.3	64592.7	66193.4	68187.7	68777.9	70147.4	64468.4	63721	67400.8	62734.9	62294.9	37435.8	37435.8	37435.8	37435.8	37435.8	37435.8	37435.8	37435.8	37435.8	37435.8	37435.8	37435.8	13047.2	12939.2	12452.1	12353.2	12142.2	11629.2	9673.73	9718.03	9707.89	9677.47	9679.07	9712.94
40		37838	37664.7	37207.2	36945	36866	37416	15554.1	15400	15330.6	15426.7	15539.5	15432.7	5950.1	5853.94	6189.39	6958.02	7311.91	6845.84	6326.23	6796.12	7075.69	6402.63	6385.77	7933.57	4882.08	4882.08	4882.08	4882.08	4882.08	4882.08	4882.08	4882.08	4882.08	4882.08	4882.08	4882.08	15858.9	16580.1	19022	18492.3	18203.8	19070.3	10396.2	10377	10397.2	10434.2	10433.3	10402.9
41		30882.3	30320.6	29664.2	30259.4	30402.9	30060.3	5830.08	5861.05	5934.84	5924.69	5974	5929.96	2325.21	2536.7	2756.11	2788.99	3049.01	2715.51	2875.09	2890.7	2452.87	2225.61	2415.42	2573.29	1595.43	1595.43	1595.43	1595.43	1595.43	1595.43	1595.43	1595.43	1595.43	1595.43	1595.43	1595.43	12411.5	12391.3	12019.2	12083	12445.7	12615.7	13543.6	13541.3	13548.5	13543.5	13527.4	13519.6
42		51906	51833.5	57196.4	58441.1	52691.9	54390	18257.9	17864.7	18347.1	18188.7	17030.1	16964.6	16716.2	15961.7	18376.8	18485.1	18793.4	23021.2	18782.3	15515.8	14930.5	17145.2	20141.8	23731.6	12507	12507	12507	12507	12507	12507	12507	12507	12507	12507	12507	12507	14229	13838.2	13979.9	14336.8	13863.2	12638.2	10630.5	10674.7	10694	10666.4	10602.1	10677.5
43		36056.7	35976.4	34756.5	34891.9	37525.7	38304	9152.38	8969.31	9002.44	9599.43	9061.17	8359.06	4217.3	4706.76	4840.64	4683.59	4955.92	5751.04	5877.46	6223.8	4737.29	4146.27	4412.63	4745.84	2585.45	2585.45	2585.45	2585.45	2585.45	2585.45	2585.45	2585.45	2585.45	2585.45	2585.45	2585.45	14498	14498	14498	14498	14498	14498	4418.98	4418.98	4418.98	4418.98	4418.98	4418.98
44		59398.2	59435.2	55289.7	52419.4	53280.6	53299.3	4184.21	4492.77	4264.75	3902.43	4018.96	4155.84	3588.22	3737.77	3789.97	4010.44	3747.45	3563.94	4245.83	4173.73	3511.36	3149.76	2883.97	2918.22	1785.18	1785.18	1785.18	1785.18	1785.18	1785.18	1785.18	1785.18	1785.18	1785.18	1785.18	1785.18	13311.7	12835.1	12503.5	13343.8	14219.1	13331	8737.61	8753.8	8777.47	8790.37	8754.98	8737.42
45		12363.9	12781.6	13054.5	13120.1	13118.8	12060.8	20595.5	22694.6	21317.3	19568.7	19700.2	19671.5	15461.5	15750.7	17473.7	17446.5	21783.9	24976.2	18042	17413.8	19401.2	18583.2	17586.2	20148.2	15572.7	15572.7	15572.7	15572.7	15572.7	15572.7	15572.7	15572.7	15572.7	15572.7	15572.7	15572.7	6037.18	6010.57	6013.16	5944.67	5878.32	6116.97	11280.6	11262.1	11279	11284.2	11267.3	11260.8
46		31090.1	30799.8	26847.7	25307.4	30281.6	35426.3	8455.07	7844.64	7544.13	7590.61	7903.29	7388.2	4251.22	5075.41	4259.24	3655.66	3244.47	5913.44	7731.81	5697.29	5132.16	3757.79	4520.48	5487.39	3210.54	3210.54	3210.54	3210.54	3210.54	3210.54	3210.54	3210.54	3210.54	3210.54	3210.54	3210.54	14046.2	14526.5	14357	13868.3	13875.4	13761.2	7268.48	7279.31	7294.62	7272.35	7256.64	7253.42
47		39545.9	38987.2	36993.2	37070.5	37743	38003.3	172.344	169.974	175.943	172.785	168.636	170.306	75.9059	98.3335	111.153	116.923	120.361	99.6908	80.1213	61.2687	67.2741	102.611	118.951	109.136	68.444	68.444	68.444	68.444	68.444	68.444	68.444	68.444	68.444	68.444	68.444	68.444	10210.3	10918.9	12183.9	11792.8	13379.1	13706	10152.5	10147.4	10149.8	10165.4	10165.4	10149.6
48		11562.3	10886.9	9548.8	10671.3	11160.5	9558.34	21315.7	21840.2	21243.1	20504.5	20414.7	20749.9	12289.6	11533.7	11508.9	18145.1	11739.5	11720.8	12929	13566.8	15739.7	11584.8	9078.39	9014.25	7066.44	7066.44	7066.44	7066.44	7066.44	7066.44	7066.44	7066.44	7066.44	7066.44	7066.44	7066.44	7993.26	7870.5	7985.77	8162.19	7909.44	7856.34	5845.83	5844.98	5847.49	5848.9	5847.37	5851.43
49		32866	33333.2	32677.1	30069.8	34068.7	42106.3	14735	13770.8	13483.4	13849.4	14843	14248.7	9700.78	8950.42	10250.6	7636.15	8113.81	11405.5	10639.4	10273.9	10489.8	11645.3	7221.06	8376.23	8381.69	8381.69	8381.69	8381.69	8381.69	8381.69	8381.69	8381.69	8381.69	8381.69	8381.69	8381.69	15282	15489.3	15146.4	14840.4	14739.4	14518.5	10690.4	10696.3	10715.6	10714.5	10701.4	10696.2
50		44220	44112.3	44319.8	43554.5	42731.7	47156.8	3219.42	2882.45	2718.91	2751.99	2789.99	3105.58	2635.54	2049.93	2557.68	2225.22	2107.6	2495.23	3432.02	2930.19	2450.81	2287.91	2403.53	3544.34	2086.83	2086.83	2086.83	2086.83	2086.83	2086.83	2086.83	2086.83	2086.83	2086.83	2086.83	2086.83	10356.5	10461.7	10172.6	9956.44	10158.6	10438.6	5460.82	5458.54	5456.48	5448.31	5478.5	5463.77
51		51114.5	51665.1	52625.3	53800.2	56116.2	55107.5	32749.8	32494.5	32921.3	32725.8	32291.4	32278.7	35641.3	36059	34994.7	33620.4	33907.9	34402.8	34690	36150.7	35746.7	35221.6	35730.9	35406.5	21751.4	21751.4	21751.4	21751.4	21751.4	21751.4	21751.4	21751.4	21751.4	21751.4	21751.4	21751.4	16568	16640.8	16505.1	16295.3	16494.8	16740.8	5272.2	5268.2	5266.08	5268.5	5271.2	5272.9
52		33989.4	35312.7	32656.4	30884.7	34507.2	33106.8	11377.4	11280.4	12266.3	12779.6	12527.6	12892.5	10080	9866.89	8094.69	6278.4	6751.49	7122.84	6024.32	5679.61	6065.37	7861.13	4716.31	5335.33	5352.62	5352.62	5352.62	5352.62	5352.62	5352.62	5352.62	5352.62	5352.62	5352.62	5352.62	5352.62	14575.2	14874	15376.3	15581	15611.4	14768.8	12764.2	12784.2	12817.6	12822.2	12812.1	12807.9
53		51735.3	52885.4	54675.2	56603.8	55367.9	53078	30065.3	28040.1	29995.2	30333.3	30202.6	33106	25624.5	24750.7	25502.9	24278.6	24825.3	22467.8	17034	19764.6	26761.5	25036.3	18391.2	14518.1	14124.6	14124.6	14124.6	14124.6	14124.6	14124.6	14124.6	14124.6	14124.6	14124.6	14124.6	14124.6	14158.6	13480.5	13172.6	13739.3	13766.4	14219.2	7932.38	7910.13	7908.07	7917.45	7917.97	7919.99
54		55488.3	51847.4	49369.4	54664.1	59401.3	55798.8	46931.3	47773.3	44741.9	47262.9	48911.3	47598.8	35895	33823.2	41535	26367	18919.4	21650	19771.9	21810.5	31275.9	51667.5	49694.1	30257.9	19604.6	19604.6	19604.6	19604.6	19604.6	19604.6	19604.6	19604.6	19604.6	19604.6	19604.6	19604.6	10225.7	10413	9996.24	9559.31	10179.6	10295.7	4566.91	4567.29	4572.26	4578.62	4579.43	4577.75
55		14963.2	14796.7	15159.9	13820	12499.8	14202.6	6984.33	7013.39	6667.3	7255.22	7756.32	6601.31	4213.26	6766.5	5423.93	5449.27	5978.75	5606.26	5133.88	4525.32	3889.92	4380.82	5966.27	6930.71	4842.19	4842.19	4842.19	4842.19	4842.19	4842.19	4842.19	4842.19	4842.19	4842.19	4842.19	4842.19	14399.3	14545	14720.4	14718.8	14759.6	14957.6	7234.59	7217.25	7200.79	7214.62	7237.86	7228.23
56		56453.4	57229.4	56040	55467.2	57931.4	57567.7	3288.93	3332.05	3349.97	3242.99	3264.28	3306.71	3317.42	3191.65	2775.42	2983.06	3405.48	3398.15	3338.73	2989.76	2988.03	3602.84	3692.69	3325.01	1849.13	1849.13	1849.13	1849.13	1849.13	1849.13	1849.13	1849.13	1849.13	1849.13	1849.13	1849.13	14284.8	13544.1	13329.4	13869.9	14212.4	14496.6	4897.46	4886.31	4886.76	4903.64	4893.19	4898.97
57		28646.3	26978.2	25297	25561.7	28793.6	30422	3489.8	3564.22	3658.18	3857.91	4114.16	3842.84	2314.17	2283.13	2355.92	2062.83	2180.1	2834.5	2853.14	2482.99	2949.28	3302.51	2377.75	1706.42	1695.53	1695.53	1695.53	1695.53	1695.53	1695.53	1695.53	1695.53	1695.53	1695.53	1695.53	1695.53	19268.8	19332	18614.6	18210.5	18879.6	19403.5	7356.82	7343.95	7327.91	7346	7380.35	7358.61
58		38397.7	41064.6	43792.4	39120.6	38781.2	40875.5	22681.6	22592.7	24471.5	24633	23496.1	23135.9	21838.6	19126.4	19292.2	23783.9	28457.2	27576.2	21624	24064.8	24104.3	23966.4	23032.6	19808.2	12360.2	12360.2	12360.2	12360.2	12360.2	12360.2	12360.2	12360.2	12360.2	12360.2	12360.2	12360.2	16870	16611	15995.3	15621.6	15403.3	15531	11825.2	11880.3	11834.3	11798.4	11825.3	11802.1
59		6358.66	7308.55	7631.33	6532.02	6222.09	6390.49	427.114	424.031	421.321	407.837	441.537	434.422	291.08	286.563	362.099	298.428	213.219	270.238	360.786	311.712	317.613	293.508	260.477	271.09	175.329	175.329	175.329	175.329	175.329	175.329	175.329	175.329	175.329	175.329	175.329	175.329	15041.7	15445.6	14539.1	13201.4	14217.2	14876.4	7177.91	7192.33	7191.05	7189.72	7201.06	7187.8
60		61551.6	64682.6	64508.9	60537.3	61175.1	62164.1	22422.8	22496.3	23061.4	22716.4	22896.9	22975.9	30885.8	31026.7	27831.6	27879.6	28004.6	27662.7	27345.9	28939.3	31428.4	31347.1	30048.6	29657.8	17393.1	17393.1	17393.1	17393.1	17393.1	17393.1	17393.1	17393.1	17393.1	17393.1	17393.1	17393.1	11869.3	11865.8	11802.1	11756.6	11417.5	11332.1	10985.8	10988.8	11007.8	11007.3	11012.7	11006.6
61		53357.9	53215.5	49819.6	45596.3	47412.3	55222.1	23745.5	22138.1	21643.8	21835.6	21809.1	23326.8	28291	20676.5	12379.8	11119.2	16648.3	22252.9	20551.3	23107.8	23532	17617.6	16995.5	15975.9	10089.6	10089.6	10089.6	10089.6	10089.6	10089.6	10089.6	10089.6	10089.6	10089.6	10089.6	10089.6	7204.55	6630.68	6500.07	7012.71	7117.4	7320.87	6617.5	6628.97	6646.35	6615.04	6572.14	6585.43
62		22760.9	22776.6	23583.8	24494.9	23189.4	21944.9	25384.6	26496.1	25906.1	25350.5	26799	27020	32071.4	26771.1	25638	29620.3	27034.4	27854.5	30083.9	29138	25898.9	24300.5	29746.2	30949.9	15344.6	15344.6	15344.6	15344.6	15344.6	15344.6	15344.6	15344.6	15344.6	15344.6	15344.6	15344.6	11791.1	11223.9	11206.8	11392.4	11086.8	11968.6	11514.3	11490.9	11438.8	11436.1	11521.7	11497.8
63		21260.1	20654.9	20395.2	21857.8	21949.5	20638.2	10882.9	11012.8	11024.7	10890.4	10617.4	10838.2	5425.18	4739.67	4462.59	5434.59	5304.31	4628.03	5417.95	5046.68	5003.79	5684.18	5700.29	6290.93	3237.1	3237.1	3237.1	3237.1	3237.1	3237.1	3237.1	3237.1	3237.1	3237.1	3237.1	3237.1	19209	19122.8	20326.8	20208.5	18827.4	18903.3	5324.05	5323.38	5327.02	5344.26	5344.89	5335.51
64		41133.4	38473.8	35142.5	36962	34456.1	35093	35975.9	33026.9	35752	35619.6	34444.1	37643	38446.2	45360.3	39320.2	40617.6	36314.7	37254.7	33738.1	28954.9	36937	46787.5	34528.5	20960	15402.3	15402.3	15402.3	15402.3	15402.3	15402.3	15402.3	15402.3	15402.3	15402.3	15402.3	15402.3	9587.13	9740.98	9977.32	9862.56	9569.08	9551.4	3894.82	3899.68	3899.41	3872.78	3878.32	3911.56
65		44060.9	40896.5	39879.8	43301.7	43202.4	45087.9	38305.8	37449.7	39411.6	40772.6	39759.9	38570.7	25076.5	23706.1	19216.3	20195.9	30875.6	21599.5	21146.6	23418.6	18773.2	27995.2	35065.9	27703.3	16391.3	16391.3	16391.3	16391.3	16391.3	16391.3	16391.3	16391.3	16391.3	16391.3	16391.3	16391.3	8625.78	8685.02	8769.78	8687.28	8596.99	8570.14	9347.38	9349.94	9349.32	9345.51	9353.81	9365.8
66		36455.6	36282	35058.9	35497.8	36705.8	36798.3	37482.5	36787	35017.6	36228.8	36997.1	36140.5	37768.9	35574.4	34191	35581.6	33991.8	32187.5	30184.4	30111	29497.7	31913.6	31972	30942.5	20850.4	20850.4	20850.4	20850.4	20850.4	20850.4	20850.4	20850.4	20850.4	20850.4	20850.4	20850.4	7932.62	8161.72	8074.15	8144.51	9264.88	9299.44	6052.07	6052.1	6035.99	6015.86	6042.66	6026.16
67		48435.9	50000.5	52334	51133.7	49310.3	50214.4	6544.59	6532.64	7312.53	7240.12	7285.61	7121.9	4727.93	4267.27	3395.33	4521.96	6760.79	6120.22	4774.3	4188.88	6130.88	5611.46	2282.69	1926.9	1636.34	1636.34	1636.34	1636.34	1636.34	1636.34	1636.34	1636.34	1636.34	1636.34	1636.34	1636.34	10915.1	10842.3	10860.1	10812.5	10693.9	10909.2	3896.12	3892.67	3898.38	3897.62	3897.16	3900.63
68		16748.7	15911.2	16408.8	17277.3	15549.7	15413.1	16096.3	16235.6	16050.5	15968.6	15792.4	16132.3	8473.63	8413.41	8969.52	6972.37	6359.98	7604.43	9372.51	9124.66	7807.12	7095.35	8163	8736.97	5113.44	5113.44	5113.44	5113.44	5113.44	5113.44	5113.44	5113.44	5113.44	5113.44	5113.44	5113.44	8242.76	8373.97	8030.68	7962.94	7640.64	7490.62	7252.3	7237.66	7181.37	7204.53	7224.11	7204.29
69		51696.9	52960.5	50807.2	51378.5	56935.2	52981.8	34220.4	35821.7	35499.8	34789.5	35141.2	34256.6	26057.5	21681.8	18755.2	26116.4	29166	27942.7	26974.6	21221.8	25199.1	32194.9	43659.2	70102.6	16973.7	16973.7	16973.7	16973.7	16973.7	16973.7	16973.7	16973.7	16973.7	16973.7	16973.7	16973.7	12059.5	11415.4	11591.5	11990	11457.6	13154.7	7809.47	7738.92	7761.4	7739.25	7702.48	7691.39
70		38718	36577.6	37289.4	40124.3	41291.9	41923	11754.5	12333.5	12996	12609.9	12926.6	12100.4	10013.4	10929.6	9774.19	9746.85	12719.3	12373.6	11472.4	11011	11525.9	10290.7	8360.55	11109.1	10301.8	10301.8	10301.8	10301.8	10301.8	10301.8	10301.8	10301.8	10301.8	10301.8	10301.8	10301.8	12691.1	13016.4	14400.2	14214.7	13401.5	13411.4	3927.91	3934.38	3951.21	3939.21	3936.61	3948.36
71		47936.7	44984.1	45861.6	50450.1	50100.8	46859.4	5716.39	5991.21	5955.61	6012.82	5807.6	5893.13	6467.87	5386.55	4947.58	4690.04	6416.97	9856.1	6054.53	7215.07	6778.41	3946.32	4308.14	4586.5	2575.95	2575.95	2575.95	2575.95	2575.95	2575.95	2575.95	2575.95	2575.95	2575.95	2575.95	2575.95	13330.6	13087.2	13302.3	13754.9	13345.2	13830.8	10968.5	10950.5	11031.7	11008.6	10961.1	10978.9
72		56507.7	54636	58891.2	62093.4	60619.8	61710.2	13743.6	13782.6	14314.4	15412.1	15128	14642.2	12605.5	9566.59	11976.6	11508.4	12075.7	22591.3	15403.1	8541.96	10220.7	11588.5	9807.26	8644.73	5626.23	5626.23	5626.23	5626.23	5626.23	5626.23	5626.23	5626.23	5626.23	5626.23	5626.23	5626.23	18711.3	19252.8	19367.7	19427.4	19274.8	19554.4	14294.3	14219	14209.8	14258	14264.2	14264.6
73		36159.2	34797.4	32469.6	34524.8	34857.2	33836.1	2207.52	2096.37	2089.94	2144.08	1982.94	1997.47	918.231	914.163	1176.01	1130.31	1127.97	1205.43	1287.61	1215.84	933.814	1232.12	1781.37	1557.06	612.594	612.594	612.594	612.594	612.594	612.594	612.594	612.594	612.594	612.594	612.594	612.594	9513.01	9834.48	9885.04	9549.83	9708.56	9796.44	4907.65	4903.17	4896.02	4901.82	4900.14	4894
74		61260.2	61668	61450.2	60658.8	61773.2	62135.9	35255.6	34751.6	34699.5	34931.3	35063.5	35185.2	44560.9	45264.2	45297.3	44589.9	42957.6	43820.7	44369.4	44092.9	43953.5	43845.2	44465.5	45016.4	26158.2	26158.2	26158.2	26158.2	26158.2	26158.2	26158.2	26158.2	26158.2	26158.2	26158.2	26158.2	14473.8	14488.3	14439.8	14395.2	14418.2	14401.8	8752.88	8753.61	8751.61	8752.16	8754.15	8752.76
75		47254.6	42964.2	40116.8	46568.6	44698.6	40180	16444.2	15575.5	14823.6	16034.6	16038.3	16334.6	8856.1	8629.73	10068.1	12787.1	13760.7	10982.6	12216.6	19247.8	20688.9	12600.7	10928.1	14202.7	7319.03	7319.03	7319.03	7319.03	7319.03	7319.03	7319.03	7319.03	7319.03	7319.03	7319.03	7319.03	10255.6	10056.3	9978.17	10126.9	10021.2	9992.04	6248.92	6254.32	6260.73	6252.76	6266.43	6275.9
76		15267	15275.8	15233.1	15198.7	15134.1	15156.4	6083.84	6083.08	6070.8	6082.28	6091.88	6049.74	2266.86	2357.93	2436.95	2441.13	2355.07	2328.75	2317.09	2310.07	2366.34	2388.73	2437.85	2485.25	1678.2	1678.2	1678.2	1678.2	1678.2	1678.2	1678.2	1678.2	1678.2	1678.2	1678.2	1678.2	16501.7	17385.4	17527.7	15665.3	15580.5	18236.8	4963.38	4938.74	4940.94	4918.86	4926.22	4941.63
77		39191.3	39264.1	38364.7	38616.5	39775.6	39678.7	12057.6	11742.8	12004.8	11685.9	12601.4	12773.4	10071.2	9702.15	7476.99	8061.13	8944.99	10051.5	11724.5	10196.7	7689.48	8701.4	8797.83	9946.06	5903.37	5903.37	5903.37	5903.37	5903.37	5903.37	5903.37	5903.37	5903.37	5903.37	5903.37	5903.37	19098.8	18999.9	18980.6	18353.7	18739.4	19830.5	11962.3	11924.9	11896.6	11880.3	11903.3	11970.4
78		36422.9	37748.8	37857.7	35902	36655.7	36902.5	36723.6	37650.9	36968.2	36026	36221.2	36482.1	21204.3	23506.5	19691.5	19914.6	17519.6	16968.5	17455.1	19005.3	21908.4	19318	17493.1	20598.9	12187.9	12187.9	12187.9	12187.9	12187.9	12187.9	12187.9	12187.9	12187.9	12187.9	12187.9	12187.9	18898.5	18164.3	17823.1	18455.4	18789.7	19206.6	9092.4	9099.1	9073.81	9087.84	9114.48	9063.99
79		53895.7	53294.1	51126.4	45172.1	46858	52898.6	15708.1	15380.5	14463.9	16378.3	17887.7	15819	11663.7	15433.1	11566.5	9969.52	14274	14844.5	13956.6	13546	9911.54	10417.5	12955.5	14164.3	6787.61	6787.61	6787.61	6787.61	6787.61	6787.61	6787.61	6787.61	6787.61	6787.61	6787.61	6787.61	20204.6	21419.7	21989.8	21196.1	22362.6	20270.9	3434.48	3457.09	3463.26	3459.34	3465.76	3460.08
80		71730.7	68783.6	62959.1	60160.7	60150.3	67634.3	42748	42344.8	43349	39295.3	39139.5	42712.3	41257.9	39592.7	38402.1	38863.5	40088.9	37331.9	36482.5	39900.6	41163.3	31474.5	30978.4	35183	22854.9	22854.9	22854.9	22854.9	22854.9	22854.9	22854.9	22854.9	22854.9	22854.9	22854.9	22854.9	15155.6	15450.1	16457.6	16398.4	15207.1	14375.5	6555.47	6587.86	6565.67	6555.47	6568.37	6595.29
81		25945.9	24836.5	26036.9	28479.1	27187.1	27081.7	13366.5	12881.3	12297	12917.3	13186.7	12479.6	6235.41	6635.91	4862.41	5210.08	5581.26	5462.52	5450.66	5585.22	6840.7	8458.17	7235.91	6362.67	3563.88	3563.88	3563.88	3563.88	3563.88	3563.88	3563.88	3563.88	3563.88	3563.88	3563.88	3563.88	7366.9	7509.69	7683.87	8284.03	8127.72	6847.06	8610.2	8647.55	8646.08	8675.21	8716.37	8658.93
82		25993.2	28982	35598.8	34570.2	31531.5	29226.7	7815.56	8130.84	8641.56	8491.65	8119.76	7666.43	3606.47	4715.66	6679.41	8779.18	8155.25	4224.93	3327.13	4393.26	4557.1	6678.79	7518.22	5433.96	3537.35	3537.35	3537.35	3537.35	3537.35	3537.35	3537.35	3537.35	3537.35	3537.35	3537.35	3537.35	15258.5	14451.4	14787	16103.9	15795.7	15824.2	5208.34	5218.51	5224.1	5200.67	5188.45	5215.51
83		44814	44330.1	40517.2	39811.2	43635.1	44255.2	6243.96	6272.02	6299.9	6289.66	6116.18	6014.19	6216.49	6659.41	6273.06	6287.68	6116.54	6280.24	6986.67	6587.83	6580.95	7182.46	7063.83	6292.01	3547.73	3547.73	3547.73	3547.73	3547.73	3547.73	3547.73	3547.73	3547.73	3547.73	3547.73	3547.73	13474.7	13609.6	12863.6	12402.4	12586.4	13148.9	6438.91	6429.01	6456.77	6451.19	6425.83	6414.96
84		21716.8	22935.7	24111.1	25385.1	27765.4	25098.4	4675.41	4492.11	4143.82	4508.65	4948.63	4759	4480.45	4005.35	3617.79	3332.54	3551.9	3338.73	3508.01	4690.52	4556.02	5350.21	6124.53	5759.63	3034.35	3034.35	3034.35	3034.35	3034.35	3034.35	3034.35	3034.35	3034.35	3034.35	3034.35	3034.35	13175.5	13102.3	11262.9	11146.4	12548.1	12664.8	5511.3	5504.15	5525.29	5535.4	5526.9	5528.88
85		12083.6	11451.5	11330	11498.3	11595	12318.8	12639.3	12460.9	12387.8	12228.2	12193.4	12610.2	6805.19	6134.07	4711.68	4503.6	6264.77	7659.07	7581.66	5000.46	5662.55	7119.05	5046	5222.86	4059.76	4059.76	4059.76	4059.76	4059.76	4059.76	4059.76	4059.76	4059.76	4059.76	4059.76	4059.76	19931.3	20003.4	19718	19758.7	19914.8	19699.5	13069.8	13069.3	13060.6	13052.4	13065.6	13077.6
86		63544.3	59444.1	58650.5	65135.8	58948.1	54059.1	28611.8	30186.8	28566.1	28140	31098.7	30221.8	21057.8	22018	25330.2	22586.9	15095.9	18817	29227.5	24181.2	27362.3	21930.6	19879.8	29573.3	17837.7	17837.7	17837.7	17837.7	17837.7	17837.7	17837.7	17837.7	17837.7	17837.7	17837.7	17837.7	16658.8	16332.5	17051.2	17391.4	16338.4	15902	4421.92	4448.93	4433.47	4432	4418.02	4411.46
87		24536.1	24536.1	24536.1	24536.1	24536.1	24536.1	3258.11	3258.11	3258.11	3258.11	3258.11	3258.11	1214.89	1214.89	1214.89	1214.89	1214.89	1214.89	1214.89	1214.89	1214.89	1214.89	1214.89	1214.89	846.74	846.74	846.74	846.74	846.74	846.74	846.74	846.74	846.74	846.74	846.74	846.74	13217.6	13230.4	13202.4	13144.5	13186.4	13191.7	5491.93	5493.72	5494.27	5492.71	5492.91	5492.94
88		53480.7	51779.6	52441.3	51756.6	57076.5	66225.8	2687.86	2672.8	2559.32	2324.48	2231.02	2282.54	2848.11	3148.99	1615.58	2114.9	4141.9	2833.4	2109.67	2200.92	1813.75	2275.59	2228.47	1645.44	1238.25	1238.25	1238.25	1238.25	1238.25	1238.25	1238.25	1238.25	1238.25	1238.25	1238.25	1238.25	20585.9	18756.4	17687.3	19411.7	20367.4	20508.4	6553.65	6541.1	6532.91	6545.22	6533.45	6534.92
89		19639.6	18895.5	16540.9	17911.5	18426.7	16935.3	26517.2	26586.6	26590.1	26695.6	23611.8	22120.3	11750.5	15064	18603.8	18900.5	15658.1	18391	20412.4	20450.4	17545.9	13446.6	15850	20789.6	12438.2	12438.2	12438.2	12438.2	12438.2	12438.2	12438.2	12438.2	12438.2	12438.2	12438.2	12438.2	7343.35	7116.37	6899.44	7084.57	7419.72	7394.72	10825.4	10825.7	10799.4	10797.4	10837.4	10849.6
90		39365.6	41260.1	44220.4	40025.3	39412.8	39302.2	13597.9	14188.6	13835.8	14553.6	14573.1	13701.8	11059.3	12805.7	10802.8	9746.95	11010.9	13245	16218.8	26274.2	17147.5	9144.45	11029.8	13609.5	7683.76	7683.76	7683.76	7683.76	7683.76	7683.76	7683.76	7683.76	7683.76	7683.76	7683.76	7683.76	19478.2	20076.4	19876.4	20038.8	19754.1	20200.7	14413.6	14326.6	14296.8	14297.5	14328.7	14273.4
91		31812.2	31847.3	30216.2	28411.8	29105.3	33602.3	2241.62	2037.32	2085.16	2102.28	2078.53	2108.17	1918.4	1830.55	1852.57	2235.17	2237.66	2299.73	2397.36	1981.45	2170.52	2308.15	2056.79	2090.43	1414.13	1414.13	1414.13	1414.13	1414.13	1414.13	1414.13	1414.13	1414.13	1414.13	1414.13	1414.13	19648.9	19942.3	20613.5	21020.8	22532.2	23215	3306.18	3290.9	3308.77	3313.38	3310.65	3308.95
92		42752.6	41561.1	42413.8	41154.8	35806.5	37014.7	23528.2	24180.1	27134.6	25866.4	24603.4	25453.5	18397.1	12851.6	12349.1	16397.6	14643.2	18578.7	19902.5	17749.9	12206.7	13511.5	21944.5	31707.8	14249	14249	14249	14249	14249	14249	14249	14249	14249	14249	14249	14249	20878.5	20937.6	21797.8	20197.7	18899.8	21545.6	14846.4	14806	14861.5	14902.5	14861.5	14775
93		36286.9	37820.9	41442.1	37837	35839.1	39995.1	25879	26854.9	23439.3	22196	23329.2	25022.2	29825.5	25330.6	20332.3	12562.9	11121.9	14959.2	22005.5	22913	20896.9	21576.7	18587.4	12798.4	8871.94	8871.94	8871.94	8871.94	8871.94	8871.94	8871.94	8871.94	8871.94	8871.94	8871.94	8871.94	7016.31	7122.25	6785.31	6870.93	6920.82	6456.12	5933.32	5921.79	5927.03	5961.9	5934.77	5906.97
94		42446.3	43792.7	45262.5	44991.8	43941	42904.5	17720.9	17922.9	17327.7	17145.2	17514.9	17267	8694.66	10203	9725.76	10553.9	9192.79	8074.36	10845.8	13462.5	9053.59	9367.99	11651.2	10001.2	6483.4	6483.4	6483.4	6483.4	6483.4	6483.4	6483.4	6483.4	6483.4	6483.4	6483.4	6483.4	19867.3	19135.1	20623	21551.6	19689.5	19959.9	9279.83	9301.64	9311.37	9292.94	9294.53	9277.28
95		53980.9	54228.3	52631.4	54696.3	52735.9	49335	389.969	422.718	390.086	347.515	360.095	385.984	335.64	271.153	312.454	362.356	255.404	212.054	255.229	208.907	201.116	277.084	440.368	289.773	157.822	157.822	157.822	157.822	157.822	157.822	157.822	157.822	157.822	157.822	157.822	157.822	12079.5	11922.4	11579.2	11274.2	11186.6	11399.1	11410.4	11437.6	11448.1	11414	11408.2	11446.1
96		26942.1	25563.6	25908.2	28357.7	27449.4	24729.1	8346.91	9148.61	9223.89	9129.04	8831.44	8375.51	4476.45	5166.48	5068.62	4668.41	4199.39	5045.29	5343.56	4381.1	4639.83	6762.97	7277.34	4908.49	2654.84	2654.84	2654.84	2654.84	2654.84	2654.84	2654.84	2654.84	2654.84	2654.84	2654.84	2654.84	16271.7	18014.1	19448.1	18362.8	17369.9	16852.3	10544.8	10540.8	10556	10557.9	10588.4	10562.6
97		29011.7	28231.1	27913.1	28744.8	30539.2	28359.7	9717.24	10668.6	11284.7	10933.9	10848.6	10760.9	7019.38	7902.1	5426.49	6094.45	10015.7	8506.42	7540.88	10519.6	10010.8	4725.49	4913.97	8651.24	4432.58	4432.58	4432.58	4432.58	4432.58	4432.58	4432.58	4432.58	4432.58	4432.58	4432.58	4432.58	22847.5	23220.6	23029.1	22531.8	22727.6	23360.4	8391.26	8360.45	8377.02	8401.02	8385.15	8383.44
98		20207.3	20769.2	25108.6	24565.9	22635.4	24036.6	23574.9	23217.7	23575.9	23671.6	23662.6	23423.7	28836.2	33730.9	21311.7	18127.4	20257.3	27371.6	27119.4	20034.9	19691.4	22775.7	21932.8	20867.7	13314.9	13314.9	13314.9	13314.9	13314.9	13314.9	13314.9	13314.9	13314.9	13314.9	13314.9	13314.9	4721.44	4293.28	3877.23	4142.3	4729.02	4944.57	9291.89	9298.4	9343.79	9375.35	9333.22	9259.88
99		34272.1	35378.2	34782.7	33285.7	32608.2	32114.3	31672.3	32250.6	33248.1	33119.7	32203.8	31771.1	14189.8	13459.7	12680.1	13403.3	15674.3	17566.7	15956.1	14405.9	12853.2	13822.4	14958.8	14483.5	9310.98	9310.98	9310.98	9310.98	9310.98	9310.98	9310.98	9310.98	9310.98	9310.98	9310.98	9310.98	5342.57	5012.63	4874.95	5692.06	5763.04	4983.51	10130.1	10202.9	10297.3	10254.2	10221.4	10210.2
100		10567.2	12153.6	12208.7	10197.1	11531.6	10795.9	22482	24386.3	22523.8	22755.3	22738	22771.4	23497.1	28789.9	22944.9	29457.4	31153.7	16370.9	19664.1	20913.1	18440.7	21890.3	18725.8	13489.6	10730.6	10730.6	10730.6	10730.6	10730.6	10730.6	10730.6	10730.6	10730.6	10730.6	10730.6	10730.6	10425.6	10617.8	11600.8	11737	11028.7	11144.6	2524.88	2538.2	2551.39	2530.92	2515.22	2525.21
101		40610.2	41229.9	37431.2	36367.5	40189.3	39166.2	38571	38908.4	35819	37517.8	40955.2	37823	29813.2	38265.1	54013.4	49670.9	39597.5	37098.8	38438	40203.8	35787.5	36292.5	39508.8	33596.6	19498.7	19498.7	19498.7	19498.7	19498.7	19498.7	19498.7	19498.7	19498.7	19498.7	19498.7	19498.7	20790.5	20871.6	21226.8	20519.8	18970.1	19796.3	14541.7	14503.2	14542.1	14542.2	14516.4	14518
102		35341.3	34027.3	32683.7	36053.7	38953.8	38778.7	34106.5	32375.8	30874	32316	33173.4	33836.3	40746.2	31604.8	25594.1	21116.8	24099.9	31225.1	32034	37559.9	32377.6	24730.1	26171.1	28865.2	16707.3	16707.3	16707.3	16707.3	16707.3	16707.3	16707.3	16707.3	16707.3	16707.3	16707.3	16707.3	7482.68	7592.4	7056.66	7044.21	7249.58	7029.86	8784.19	8795.41	8792.72	8757.37	8786.32	8779
103		25665.7	25656.4	26212.9	26762.6	28451.2	29092.3	13609.8	13145.2	13323.4	13377.8	13341.7	13868.2	12997	13328.9	12196.1	10405	13729.8	13178.6	9452.51	11220.9	12781.9	13689.3	13356.5	11321	6725.4	6725.4	6725.4	6725.4	6725.4	6725.4	6725.4	6725.4	6725.4	6725.4	6725.4	6725.4	12756.6	12759.2	12762	12761.8	12760.3	12758	8683.9	8683.9	8683.89	8683.88	8683.88	8683.83
104		37417.9	37360.5	37139.8	37328.2	36995.3	36582.3	37197.2	37329.5	37430.3	37309.9	38190.7	38980.6	50919.9	49789.9	50298.6	49949.7	49979.3	49212	49178.6	49313.8	50105.3	50892.6	47053.9	47038.5	28977.8	28977.8	28977.8	28977.8	28977.8	28977.8	28977.8	28977.8	28977.8	28977.8	28977.8	28977.8	19526.5	19501.5	19276.7	19466.3	19053.5	18507.3	4006.71	4004.35	4000.85	4006.94	4007.42	4005
105		54858	55369.5	54823.2	52561.6	53564.7	57392.5	26754.8	26072.9	25473.3	25679.4	26371.1	26445.5	30959.7	28815.6	28213.8	27232.6	27915.6	30497.3	30896.2	29179.8	27273.5	27284.5	27555.7	27341.8	17052.3	17052.3	17052.3	17052.3	17052.3	17052.3	17052.3	17052.3	17052.3	17052.3	17052.3	17052.3	17378.9	17910.6	19401.5	18646.5	17404.2	16687.8	5895.55	5928.47	5942.54	5919.65	5916.92	5934.44
106		51795.9	55313.8	47916	42056.5	45694.9	47725.8	25205.1	23810.6	23342.9	22847.2	21896.4	22319.8	13505.4	13384.7	21961.6	37651.8	30553.6	17532.3	17497.1	24095.7	20504.7	18986.4	23536.5	23755.2	8409.47	8409.47	8409.47	8409.47	8409.47	8409.47	8409.47	8409.47	8409.47	8409.47	8409.47	8409.47	18391.8	19067.7	19815.8	20052.5	19917.3	18838.3	9166.21	9167.58	9182.98	9174.46	9143.5	9154.67
107		27748.8	28730.9	28557.4	28228.5	27020.3	26027.4	49324.4	49090.1	50311.4	52427.9	51373.7	46885.9	33003.7	33698.6	36817.8	39102.8	39662.2	49476.9	56874.8	39484	31039.5	39244.2	43957.9	43116.3	31372.6	31372.6	31372.6	31372.6	31372.6	31372.6	31372.6	31372.6	31372.6	31372.6	31372.6	31372.6	16785.6	16530.8	16153	15250.9	14896.1	16588.6	14178.1	14145.9	14165.5	14187.5	14277	14306.7
108		41457.3	41547.4	41372.3	41253.5	41592.7	41463	2462.22	2469.46	2472.08	2480.34	2479.1	2477.13	3048.55	3051.56	3081.61	3041.44	2995.75	2989.48	3001.53	3041.52	3053.1	3065.76	3047.49	3006.38	1773.04	1773.04	1773.04	1773.04	1773.04	1773.04	1773.04	1773.04	1773.04	1773.04	1773.04	1773.04	8847.07	8902.01	8911.79	9347.12	8512.79	7804.55	6693.86	6702.12	6731.66	6730.66	6691.37	6671.34
109		33839.1	33679.3	33174.2	33472.5	33820.7	34027.8	7574.89	7566.63	7511.82	7453.5	7598.63	7575.83	9509.81	9509.47	9198.03	9200.07	9472.17	9411.98	8912.11	9187.96	9552.31	9583.96	9619.07	9357.2	5467.04	5467.04	5467.04	5467.04	5467.04	5467.04	5467.04	5467.04	5467.04	5467.04	5467.04	5467.04	20375.3	20266.9	21403.8	22016	21015.8	20737.1	14729.4	14730.5	14722.2	14712.7	14744.9	14796.8
110		64572.4	64229.6	62740.3	60388	69417	75696.9	12925	12897.2	12103.7	12119.3	12946.2	12646.5	11377.5	10381.9	9103.23	10643	11795.5	10288	12678.4	12752.9	10682.1	12071.6	13174.3	12116.6	8086.59	8086.59	8086.59	8086.59	8086.59	8086.59	8086.59	8086.59	8086.59	8086.59	8086.59	8086.59	21810.7	22569.2	20740.3	20216.9	22045.1	20815.6	10044.3	10071	10088.7	10007.8	10013.9	10051.6
111		35714.6	34919.7	33962.3	35887.5	36583.9	35478.4	21262.2	21301.3	20703.3	20281.9	21996.8	21655.8	9343.8	8412.69	10177.8	10242	15137.9	17494.3	16806.6	22292	11462.7	8799.42	11555.9	14221.6	7059.11	7059.11	7059.11	7059.11	7059.11	7059.11	7059.11	7059.11	7059.11	7059.11	7059.11	7059.11	11446	12180.9	12879.2	12592.8	12109.7	11547.8	15508.1	15488.2	15495.2	15532.5	15591.7	15499.4
112		39902.5	37767.5	35566.7	37933.3	37033.6	35879	21465.3	21043.5	21690.7	22682.5	22886	22401	13267.3	13838.5	10654.9	12117	13287.5	12069.2	13790.2	9720.4	9990.05	9554.51	8249.15	10104.6	7699.36	7699.36	7699.36	7699.36	7699.36	7699.36	7699.36	7699.36	7699.36	7699.36	7699.36	7699.36	13019.8	13695.4	13941.3	13011.5	13215.8	14305.5	5841.92	5826.2	5800.88	5799.64	5815	5773.29
113		48311.7	43795	45168.7	46868.8	43626.5	50050	6283.58	5838.42	6251.41	5954.91	5662.63	6322.91	5388.08	4407.61	3624.36	4364.24	3299.51	2835.2	4133.14	5909.05	7109.77	9263.47	6727.79	2821.87	1684.87	1684.87	1684.87	1684.87	1684.87	1684.87	1684.87	1684.87	1684.87	1684.87	1684.87	1684.87	13188.8	13333.2	12691.5	12001.4	12938.8	14106.6	9702.61	9691.48	9696.42	9707.5	9682.08	9675.67
114		46912.3	46556.4	46254.4	46332.1	46519.6	46632.3	31202.5	31329.6	31267.3	31186.5	31556.5	31751.6	35934.7	35589.1	36345.1	36619.2	37021.5	36725.4	37120.4	36958.7	36256.6	36451.9	35874.4	35663.1	21483.2	21483.2	21483.2	21483.2	21483.2	21483.2	21483.2	21483.2	21483.2	21483.2	21483.2	21483.2	13908	14080.8	15048.4	15833.5	16300.8	16081.2	5142.94	5147.52	5110.84	5086.45	5068.2	5102.45
115		40375	40333.1	40201.8	40359.4	40481.5	40241.9	3085.83	3097.79	3092.66	3070.68	3064.61	3078.7	3600.6	3688.32	3723.6	3583.62	3596.03	3636.43	3629.87	3754.65	3674.37	3606.72	3676.42	3609.29	2129.76	2129.76	2129.76	2129.76	2129.76	2129.76	2129.76	2129.76	2129.76	2129.76	2129.76	2129.76	17862.4	18321	18922.3	18523.9	20195.5	20616.8	3705.62	3702.96	3697.68	3716.26	3703.94	3675.64
116		28668	27693.2	28063.7	26667.9	22857.6	25935.6	15538	15501.2	15360	14298.3	13952.8	14082.6	7057.23	8468.63	8757.57	11238	13183.6	9499.32	9010.26	8842.23	8031.74	8849.25	13347.5	14907	6604.6	6604.6	6604.6	6604.6	6604.6	6604.6	6604.6	6604.6	6604.6	6604.6	6604.6	6604.6	14725.4	15064	14850	14690.4	14381.4	15177	3918.24	3876	3883.15	3917.68	3893.32	3877.95
117		48094.4	47600.8	48069.8	49054.5	49475.1	48913	9762.97	9872.38	9601.34	9616.94	9772.19	9886.51	10435.9	9971.23	9937.79	9937.92	11040.5	10928.6	9820.52	10056.5	10754.1	10653.3	10836.3	11680	6665.21	6665.21	6665.21	6665.21	6665.21	6665.21	6665.21	6665.21	6665.21	6665.21	6665.21	6665.21	13981.3	14314.4	15571.9	15729.9	15353.1	15068.4	3982.28	3979.59	3977.26	3991.5	4001.02	3991.03
118		28656.9	27908.6	27676.2	28643.3	28181.1	25722	43935.2	49927.4	45721	41346.4	42606.9	40251.8	22368.2	33654.5	25629.4	26213.1	27387.8	30148.1	24955.8	29521.3	57470.6	58014.3	56007.7	46577.8	22173.9	22173.9	22173.9	22173.9	22173.9	22173.9	22173.9	22173.9	22173.9	22173.9	22173.9	22173.9	10994.2	10734.5	10604.3	10146.1	10079.6	10544.2	8971.05	8996.23	8997.94	8959.48	8933	8968.89
119		33683.7	34201.5	35767.1	34728	35569.3	37092.7	1867.54	1857.85	1947.89	1871.56	1920.06	2044.48	2003.68	1789.09	1756.61	1926.49	1865.63	1628.8	1685.58	1867.43	1925.82	1749.56	1957.81	2105.67	1073.31	1073.31	1073.31	1073.31	1073.31	1073.31	1073.31	1073.31	1073.31	1073.31	1073.31	1073.31	16046.5	16248.7	16392.1	16560.6	16917.2	16472.1	7722.1	7716.33	7714.1	7719.44	7727.93	7730.9
120		35447.1	36377.9	36899	36236	38379.4	38614.8	28354.7	27365.5	26509.7	27438	27882.3	27467.8	18867.1	17790.3	16301.1	18188.1	11743.8	13161.5	14182	12160.6	16230.6	15229.7	17854.4	26482	10332.6	10332.6	10332.6	10332.6	10332.6	10332.6	10332.6	10332.6	10332.6	10332.6	10332.6	10332.6	8003.86	8211.5	8816.35	7923.5	7529.59	8557.85	9411.78	9402.81	9407.64	9421.12	9396.16	9370.92
121		50622.7	47004.7	47171.6	50965.1	41402.3	43205.4	29551.3	28620.9	26392.6	24564.7	25585.6	27001.9	18414.8	15344.5	18322.7	17711.1	15444.5	19091.6	14604.3	18246.7	27075.4	22745.5	10403.6	9755.67	11633.1	11633.1	11633.1	11633.1	11633.1	11633.1	11633.1	11633.1	11633.1	11633.1	11633.1	11633.1	11714.2	11758.3	11441	11649	12144.8	11953.6	7569.85	7582.11	7597.78	7580.32	7577	7595.11
122		44405.6	44557.6	44420.8	44638.6	45520.6	45168.5	11370.9	11455.6	11281.7	11106.2	10896.8	11152.2	12947.1	12033	12490	13193.7	12741.7	12334.2	12143.4	12300.4	12430	12431.5	12437.7	12352.3	7328.02	7328.02	7328.02	7328.02	7328.02	7328.02	7328.02	7328.02	7328.02	7328.02	7328.02	7328.02	15674.5	16428.4	16914.8	16014.5	17067	18180.2	14597	14575.2	14585	14494.6	14491.5	14616.2
123		20946.3	20916.8	20750.5	20787.1	20858.1	20783.6	9157.22	9166.79	9181.2	9167.05	9188.06	9194.87	11092.7	11167.5	11280.6	11167.2	11076.5	11162.5	11127.8	11245.6	11288	11188.6	11208.4	11279.7	6685.55	6685.55	6685.55	6685.55	6685.55	6685.55	6685.55	6685.55	6685.55	6685.55	6685.55	6685.55	10623.6	10941.6	10272.2	9733.81	9964.14	9773.91	4359.36	4357.49	4343.43	4352.22	4363.72	4379.2
124		39787.3	39787.3	39787.3	39787.3	39787.3	39787.3	5524.2	5524.2	5524.2	5524.2	5524.2	5524.2	2059.87	2059.87	2059.87	2059.87	2059.87	2059.87	2059.87	2059.87	2059.87	2059.87	2059.87	2059.87	1435.67	1435.67	1435.67	1435.67	1435.67	1435.67	1435.67	1435.67	1435.67	1435.67	1435.67	1435.67	7988.84	8003.01	8033.33	7992.81	7818.42	7857.08	11696.6	11693.7	11695.6	11696.7	11676.3	11674.6
125		46389.4	42326.1	43367.7	46495.6	45017.2	55179.5	2194.14	1946.92	1834.54	1863.15	1874.98	1915.99	1566.11	1395.72	1564.21	1041.21	1066.3	1127.09	1263.17	2312.06	2445.82	2313.65	2904.21	1965.26	670.341	670.341	670.341	670.341	670.341	670.341	670.341	670.341	670.341	670.341	670.341	670.341	14585.6	15208.5	15317.7	14020.5	13600.4	13937.8	10061	10102.5	10076.4	10040.6	10043.2	10042.9
126		10753.3	10995.7	11502	10652.4	10057.6	11285.2	13530	13079.3	13786.7	13913.6	13389.6	13148	7667.27	8555.28	6388.38	6119.05	7638.53	6809.34	6305.34	7294.93	7256.03	6812.48	7250.15	7839.58	4965.23	4965.23	4965.23	4965.23	4965.23	4965.23	4965.23	4965.23	4965.23	4965.23	4965.23	4965.23	17520.1	18664.5	17580.4	16331.9	16494.4	16913.9	7834.26	7801.58	7786.28	7779.48	7793.53	7797.2
127		46305.3	46319	46097.1	46398	46238.1	45892.2	1388.44	1381.24	1403.63	1415.61	1396.04	1391.96	1614.11	1626.3	1604.44	1646.25	1638.22	1581.64	1587.88	1638.33	1666.65	1605.23	1597.3	1688.12	1013.34	1013.34	1013.34	1013.34	1013.34	1013.34	1013.34	1013.34	1013.34	1013.34	1013.34	1013.34	13606	13349	13229.4	13453.4	13221.2	13230.8	8566.01	8564.96	8572.03	8567.01	8564.82	8567.18
128		68806.3	57214.3	54878.5	69317.4	64904.4	62517	43616.4	44445.6	46830.7	44159.4	37064.7	40312.1	37896.1	26351.9	21512.3	22849.4	25775.9	26167.2	31187.5	43768	48226.7	33520	38670.1	38184.8	13988	13988	13988	13988	13988	13988	13988	13988	13988	13988	13988	13988	18500.6	18430.3	18386.8	18604.7	18748	18653.5	10252.7	10249.5	10253.3	10257.6	10256.5	10254.1
129		47915	47508.4	48033.2	48219.7	49788.6	48575	631.273	695.253	737.101	672.396	698.2	715.187	325.484	325.056	479.281	468.158	413.128	404.959	356.041	384.036	430.587	363.502	341.156	386.224	267.712	267.712	267.712	267.712	267.712	267.712	267.712	267.712	267.712	267.712	267.712	267.712	8372.2	7779.46	7290.45	8026.56	8201.16	7930.53	6388.86	6390.15	6413.44	6403.13	6418.54	6429.2
130		44875.7	50154.6	53760	51013.5	48847.3	48406.2	18570	17315.4	18477.8	18644.2	17638.2	18044	14178.5	14773.5	12798.7	17701.3	18279.6	9801.42	10844.5	19723.9	15210.8	9936.85	11720.1	12855.2	9327.82	9327.82	9327.82	9327.82	9327.82	9327.82	9327.82	9327.82	9327.82	9327.82	9327.82	9327.82	12283.7	12487.1	12832.9	12619.1	12493.6	12449.1	7772.53	7772.52	7773.99	7781.56	7780.36	7784.45
131		25169.8	25536.7	25838.6	25496.6	25932.2	25485.6	1403.95	1434.29	1500.6	1452.4	1410.94	1458.97	690.997	851.309	1013.46	763.678	1040.49	937.576	583.662	676.589	913.622	1169.89	900.752	617.255	391.528	391.528	391.528	391.528	391.528	391.528	391.528	391.528	391.528	391.528	391.528	391.528	15632.8	15686.1	15358.4	15329.4	15492.7	15389.9	9458.62	9455.19	9454.56	9458.8	9466.14	9468.74
132		56678.8	55972.1	55812.9	56332.8	55786.1	55306.3	47351	47469.7	48061.7	48926.3	47946.9	47646.3	57278.2	58757	57620	57228.9	55642.2	53938	53727.5	55233	57012.2	57743.3	54608	53617.6	32453.8	32453.8	32453.8	32453.8	32453.8	32453.8	32453.8	32453.8	32453.8	32453.8	32453.8	32453.8	17538	17203.5	16295.3	16291.5	16088.3	16245.4	6540.44	6535.99	6569.12	6573.92	6526.47	6519.75
133		33414.1	31245	31530.9	35862.5	35168.9	32440.8	17465.5	17298.3	17496.3	19364.4	19115	17617.6	14051.9	13174.4	14581.5	16747.5	16296.4	15277.8	15652	16047.7	16816.4	17537.1	17991.4	16899.8	8837.04	8837.04	8837.04	8837.04	8837.04	8837.04	8837.04	8837.04	8837.04	8837.04	8837.04	8837.04	12674.1	12909	12807.7	12849.7	13239.9	12993	12164.2	12135.3	12118.2	12176.2	12255.5	12213.1
134		29678.5	30504.4	31256.8	31955.3	30509.4	31218.6	16216.6	15795.1	15090.2	13969.3	14697.8	13993	7514.2	11670.8	14109.6	11156.6	9631.35	10203	19137.1	20296.8	10119.7	10085.1	13973.8	12427.9	4501.85	4501.85	4501.85	4501.85	4501.85	4501.85	4501.85	4501.85	4501.85	4501.85	4501.85	4501.85	13454.6	13437.5	14081.7	13684	13021.9	13083.2	16485.5	16552.5	16511.1	16527.9	16521.9	16549.7
135		38263.9	36739.5	37144.1	38466.1	37939.9	37959.4	37962.5	41200.7	43997.7	39395.3	39144.8	40019.4	26658.4	35326	29096.6	21787	26113.1	29671.5	33433	34701.5	32652.4	30078.1	31539.3	29045.6	13550.7	13550.7	13550.7	13550.7	13550.7	13550.7	13550.7	13550.7	13550.7	13550.7	13550.7	13550.7	15245.1	15368.6	16546.7	16262.1	14563.3	15058.2	13363.2	13370.1	13322.6	13285.3	13287.2	13237.9
136		33025.7	33025.7	33025.7	33025.7	33025.7	33025.7	5233.63	5233.63	5233.63	5233.63	5233.63	5233.63	1951.52	1951.52	1951.52	1951.52	1951.52	1951.52	1951.52	1951.52	1951.52	1951.52	1951.52	1951.52	1360.15	1360.15	1360.15	1360.15	1360.15	1360.15	1360.15	1360.15	1360.15	1360.15	1360.15	1360.15	13545.1	13329.8	13074.9	13276.4	13261.4	13119.3	7947.6	7947.01	7933.85	7936.29	7944.44	7941.65
137		18877.5	19606.4	21720.4	20285.9	20011	20970.8	35745.5	38116.9	35796.5	32359.7	31675.2	34367.8	24226	20433.3	18641.2	16114	23746.6	21159.2	18197.9	29368.6	41290	46735.9	36030.5	29157.5	22268.7	22268.7	22268.7	22268.7	22268.7	22268.7	22268.7	22268.7	22268.7	22268.7	22268.7	22268.7	15888	15699.6	15711.2	15744.2	15275.6	15848.3	4628.07	4615.74	4628.11	4630.57	4625.85	4634.29
138		32928.4	32505.1	35468.1	40114.1	46820.6	42204.6	28330.8	28779.7	29964.6	32612.1	31892.2	30002.7	26658.3	23706.7	16457.5	17412.3	14230.2	14819.9	15682.7	15705.3	18402.7	18559.1	29030.4	19866.7	12822.6	12822.6	12822.6	12822.6	12822.6	12822.6	12822.6	12822.6	12822.6	12822.6	12822.6	12822.6	7973.27	7964.1	8033.45	8168.56	7824.39	7616.77	2283.81	2286.8	2282.66	2279.76	2283.08	2278.27
139		35889.8	41043.6	33974.1	27265.8	30582.4	31085	24417.4	24207.6	23903.4	24090.3	23957.4	24611.7	19386.2	20895.2	18588.9	13051.5	16519.1	25146.7	22713.6	17277.6	18816.9	17820.3	17881.8	21539.7	11750.2	11750.2	11750.2	11750.2	11750.2	11750.2	11750.2	11750.2	11750.2	11750.2	11750.2	11750.2	12294.4	12376.4	12066.4	11776	11832	12039.5	11258.2	11240.8	11221	11231.4	11229.3	11214.6
140		32192.7	32669.8	33707.7	32637.7	27832.8	26771.7	13242.4	14232.8	13719.2	12890.1	12947.9	13146.6	11062.8	14735.7	10146.1	6109.8	7456.67	10679	8592.26	7414.56	6687.16	6220.21	6080.43	6156.12	6427.82	6427.82	6427.82	6427.82	6427.82	6427.82	6427.82	6427.82	6427.82	6427.82	6427.82	6427.82	12487.8	12179.8	12865.2	14399.6	13699.8	13319.8	11005.6	10982	10966.1	10934.1	10928.1	10936.9
141		67200.5	69930.8	71326.2	67529.6	61864.6	60725.5	1146.33	1163.09	1232.62	1275.03	1398.23	1276.88	963.602	1158.53	1201.8	1256.29	755.81	793.341	914.375	648.005	567.476	783.448	1015.98	889.923	543.076	543.076	543.076	543.076	543.076	543.076	543.076	543.076	543.076	543.076	543.076	543.076	22740.2	21833.4	19789.7	19876.1	21510.1	20574.8	14761.2	14911.9	14875.9	14731.1	14767.7	14854.8
142		51556.2	50388.1	49748.2	53286.3	60315.9	55833.4	2023.09	2103.79	2240.16	2256.01	2199.6	2202.01	2167.57	1921.15	2127.3	3011.87	2294.92	1815.76	2007.1	2224.49	1872.03	1766.67	1933.18	1679.9	1147.37	1147.37	1147.37	1147.37	1147.37	1147.37	1147.37	1147.37	1147.37	1147.37	1147.37	1147.37	19096.1	18673.6	17763.5	17295	16669.9	17042.4	8093.66	8107.67	8112.35	8102.13	8095.56	8087.22
143		47903	47663.4	41170	39025.9	40250.7	37694	14204.4	14955	14814.4	13478	14032.6	15671.8	10826.3	10991.4	9983.43	11470.5	15145.7	11058	14599.6	13670.7	10934.9	16712.1	10784.9	11888.8	7172.36	7172.36	7172.36	7172.36	7172.36	7172.36	7172.36	7172.36	7172.36	7172.36	7172.36	7172.36	21614.1	21751.3	21375.3	21055.6	20899.8	20812	8625.29	8623.59	8643.44	8647.01	8634.05	8637.14
144		40488.5	40793.4	41332.7	41918.1	41146.6	37312.4	649.399	699.044	681.054	668.414	711.339	691.029	441.291	499.634	479.088	577.092	808.59	665.784	439.485	470.801	572.324	535.711	748.284	967.73	463.958	463.958	463.958	463.958	463.958	463.958	463.958	463.958	463.958	463.958	463.958	463.958	20393.4	19205.3	17804.7	17711.9	18664	18537.7	5093.79	5116.7	5085.51	5091.25	5105.64	5110.15
145		19876.7	20755.8	22491.8	22530	22142.2	23588.2	58834.1	52106	55652.9	57512.7	55617.2	55213.4	41939.9	45009.2	68038.7	65194.7	42927.8	56686.1	74596.5	58102.1	52204.2	47563.8	41196.8	44046.3	28490.4	28490.4	28490.4	28490.4	28490.4	28490.4	28490.4	28490.4	28490.4	28490.4	28490.4	28490.4	13103.6	13158.6	13192.7	13487.5	13710.6	13659.2	12503.8	12520.7	12515.9	12517.1	12513.9	12456.4
146		34578.6	35807.2	34841.5	35160.2	36964.6	35681.3	1616.66	1573.66	1642.2	1698.44	1646.58	1616.65	1650.34	1620.54	1391.78	1301.19	1589.11	1807.22	1578.95	1470.88	1517.77	1486.49	1509.94	1914.92	961.986	961.986	961.986	961.986	961.986	961.986	961.986	961.986	961.986	961.986	961.986	961.986	2292.27	2320.37	2314.35	2198.3	2082.92	2193.09	10692.8	10708.8	10657.6	10619.7	10633.9	10609.3
147		44392.7	45654.1	45404.8	43522.7	43944.3	44904.9	31297.3	30989.8	30638.7	30443.5	30070.6	29826	12645	13137.3	18630.5	22614	15860.4	13206.1	13019.6	13169.8	15850.8	16585.2	13481	12449.1	9402.56	9402.56	9402.56	9402.56	9402.56	9402.56	9402.56	9402.56	9402.56	9402.56	9402.56	9402.56	15385.4	15377.1	15438.6	15753.6	15958.8	15373.3	12816.3	12829.3	12845.8	12847.1	12834.5	12774.9
148		17805.9	17805.9	17805.9	17805.9	17805.9	17805.9	1224.78	1224.78	1224.78	1224.78	1224.78	1224.78	456.698	456.698	456.698	456.698	456.698	456.698	456.698	456.698	456.698	456.698	456.698	456.698	318.304	318.304	318.304	318.304	318.304	318.304	318.304	318.304	318.304	318.304	318.304	318.304	17768.1	17569.5	18199.1	18769.5	18066.5	17734.9	2056.84	2059.23	2059.15	2057.88	2055.5	2051.37
149		53854.5	57254	59524.5	57227.4	56503.2	58700.1	36457.3	35893.6	34774.9	32659.2	30055	31215.5	30469.2	29954.8	33361.5	28902.5	26633.7	27834.8	30916.9	32348.9	29164.7	28228.4	28583.5	25943.9	14945.9	14945.9	14945.9	14945.9	14945.9	14945.9	14945.9	14945.9	14945.9	14945.9	14945.9	14945.9	14416.6	14126.1	13872.8	14163	13831.2	13769.1	13250.9	13249.4	13251.6	13241.2	13234.3	13220.6
150		43536	44717	46310.8	46857.4	43469.1	43835.5	22246.3	21036	21345	21773.2	21326.5	20221.5	10858.2	11560.6	9784.41	11439.8	14451.3	14968	14334	20525.3	17174.8	11590.6	12386.9	14983.8	6395.58	6395.58	6395.58	6395.58	6395.58	6395.58	6395.58	6395.58	6395.58	6395.58	6395.58	6395.58	10224.5	10572.6	11572.7	11801.3	10826.8	10902.7	5144.3	5107.22	5122.56	5159.3	5164.64	5132.02
151		39305.1	40517.5	40068.6	38406	39651.6	37579.6	2563.97	2623.21	2628.97	2645.98	2809.39	2871.4	1287.12	1248.02	2020.55	2380.78	1596.96	1567.99	1598.24	1611.3	1836.37	1744.75	1477.82	1290.59	1024.05	1024.05	1024.05	1024.05	1024.05	1024.05	1024.05	1024.05	1024.05	1024.05	1024.05	1024.05	19858.5	21168.6	21860.3	19774.9	18778.9	20450.9	8793.36	8746.27	8716.92	8746.74	8736.9	8694.96
152		58422.7	59829	57027.6	51398.6	51110	56075	48716.8	46984.8	49831.7	47098.2	46491.5	52428.9	44052.9	44939.2	41637.1	28884.8	28143.2	38357.3	43173.5	30025	36016.1	35712.8	26287.5	37460.3	27570.7	27570.7	27570.7	27570.7	27570.7	27570.7	27570.7	27570.7	27570.7	27570.7	27570.7	27570.7	4551.25	4551.37	4682.15	4625.29	4431.64	4490.16	4805.92	4800.83	4815.25	4824.53	4812.49	4801.82
153		51416.4	51226.3	50749.4	50727.6	50008.6	50238.1	67917.4	68256.8	69302.3	68469	65817.8	66587.1	68242.4	66005.1	70303.7	82177.6	74789.2	69805.5	73485.2	69054	66637.5	65257.5	66970.7	67237.8	39179.3	39179.3	39179.3	39179.3	39179.3	39179.3	39179.3	39179.3	39179.3	39179.3	39179.3	39179.3	18624.9	18494.9	18480.2	18242.4	17727.9	17669.2	11841.7	11849.7	11872.4	11856.5	11846.3	11917.3
154		35272.7	36159.1	38375.4	37346.5	37866	36772.7	32487.1	34220.1	32830.7	32705.6	31161.8	30227.1	23909.7	27744.3	31429.2	33985.9	33240.6	35235	34636.4	24040.7	24656.7	25674.8	25276.4	31440.3	16321.5	16321.5	16321.5	16321.5	16321.5	16321.5	16321.5	16321.5	16321.5	16321.5	16321.5	16321.5	14953	15125.7	14944.5	14501.6	14462.8	15085.3	5596.72	5571.93	5559.18	5601.18	5610.43	5605.23
155		38116.6	40090.1	35853	32157.1	30966.4	31038.9	1559.83	1523.8	1629.82	1641.58	1525.13	1625.27	1558	1155.96	968.91	785.471	767.764	1106.3	670.421	648.954	813.374	947.646	1233.75	737.125	327.181	327.181	327.181	327.181	327.181	327.181	327.181	327.181	327.181	327.181	327.181	327.181	8914.77	8790.14	8864.23	9298.59	9627.33	9065.83	2859.15	2858.95	2859.35	2863.55	2863.97	2867.21
156		68495.8	72379.2	61534.5	54472.6	58775.4	57020.6	39345.7	40084	40843	44619.3	43065.1	38364.7	20921	25521.7	29839.4	41121.8	32744.6	23988.3	47300.4	39517.2	30595.8	34414.1	22553.2	19827.7	17011.8	17011.8	17011.8	17011.8	17011.8	17011.8	17011.8	17011.8	17011.8	17011.8	17011.8	17011.8	13742.1	13825.4	14637.8	15288.2	14768.7	14673	9969.24	9910.51	9857.49	9894.5	9918.17	9931.39
157		38686.7	39577.3	38050.1	41260.7	43149.1	42203.3	49345.2	44605.1	47767.1	47791.2	50131.5	48204.8	21236.3	15788.6	18269.4	33168.2	35731.5	38421.2	41293	34857	40117.8	34243	32072.5	55283.4	29802.2	29802.2	29802.2	29802.2	29802.2	29802.2	29802.2	29802.2	29802.2	29802.2	29802.2	29802.2	15762.4	15082	15090.2	15509.6	16305.4	16494.5	9579.88	9589.59	9596.13	9619.09	9620.33	9590.95
158		24514.3	23665.7	23301.9	24702.3	25088.6	24012.8	33126.1	33382.1	32537.9	32750.8	34099.6	35436.2	20232.7	19159.7	26163.7	23905.7	26052.1	22806.8	18299	21750.1	27563.3	37407.6	33174.4	20072.9	11223.7	11223.7	11223.7	11223.7	11223.7	11223.7	11223.7	11223.7	11223.7	11223.7	11223.7	11223.7	10312	10026.6	9165.92	9091.32	9976.33	10711.5	14013.8	13967.4	13942.3	13976.9	14001.2	13966.4
159		40891.9	42378.9	44085.1	39991.5	39561.7	42589.7	22490.9	22009.3	21988.2	22381	23675.7	23416.7	22651.1	25928.1	23078.6	21491.4	19630.7	21416.4	20801.8	20258.4	24916.7	27147.1	28371.5	18295.9	10239	10239	10239	10239	10239	10239	10239	10239	10239	10239	10239	10239	6302.99	6374.24	6277.2	6405.84	6538.84	6684.99	5873.41	5825.59	5817.53	5850.49	5859.31	5844.7
160		53985.7	54208.7	53123.9	53188.4	54525	52697.9	6319.91	6484.05	6400.83	6488.64	6696.28	6398.06	6301.7	6508.88	7086.12	6836.56	6353.94	6828.01	6295.52	6226.14	7652.72	7944.48	6863.39	6573.12	4040.54	4040.54	4040.54	4040.54	4040.54	4040.54	4040.54	4040.54	4040.54	4040.54	4040.54	4040.54	17225.7	18561.3	18253.5	16380.3	16498.6	17009.3	13848.6	13829.4	13787.4	13831.8	13816.7	13812
161		39155.8	40001	40783	38810.1	39467.1	43064.2	30631.7	30560.7	32217.5	32407.4	32619.9	29887.3	24266.1	23933.1	23129.5	23461.7	25626.6	31039.9	31974.6	30739.1	29886.5	29480.9	27752.2	32370.9	17522.7	17522.7	17522.7	17522.7	17522.7	17522.7	17522.7	17522.7	17522.7	17522.7	17522.7	17522.7	16220.8	17002.9	17305.2	16311.8	16661.9	16604.3	12580.2	12616.4	12632.2	12598.3	12674.6	12678.8
162		31036.4	30219	27498.2	26549.8	24461.2	26203	22352.5	21093.9	21041.3	21867	20107.1	19093.4	9437.2	12491.2	13355.4	14879.1	14625.6	13592.2	14636.2	10752	10279.2	11133.3	10976	9613.83	6335.81	6335.81	6335.81	6335.81	6335.81	6335.81	6335.81	6335.81	6335.81	6335.81	6335.81	6335.81	8587.88	8774.91	8778.72	8595.22	8950.15	9072.56	9231.26	9217.72	9204.79	9230.3	9232.15	9218.84
163		40347.8	40161.6	38820.8	37349.2	37772.9	40508.8	54710.4	52867	53808.3	54681.5	54335.1	53685.5	58835	59283.8	53318.4	53997.5	56135.5	56657.5	56770.4	55307.9	56412.5	56190.5	55951.7	58522.4	37825.1	37825.1	37825.1	37825.1	37825.1	37825.1	37825.1	37825.1	37825.1	37825.1	37825.1	37825.1	12895.7	12961.1	12803.7	12634.6	12691.2	12803.7	5700.02	5691.53	5695.68	5713.25	5699.77	5695.66
164		34910.3	33931.5	33225.8	33430.7	33825.6	35256.1	44633	43614.3	43397.9	43996.2	44739.3	44756	19572.2	17918.6	18782.4	21491.8	17918.7	18127.4	22566.5	23524.8	19747.2	20777.6	23028.5	19448.7	13350.4	13350.4	13350.4	13350.4	13350.4	13350.4	13350.4	13350.4	13350.4	13350.4	13350.4	13350.4	11861	11693.2	11255.3	11588.1	12512.5	12484.5	13534.9	13523.4	13557.6	13572.6	13572.2	13578.4
165		50882.9	51049.3	47206.6	41733.3	43213.7	46696	9276.79	9189.64	8738.6	8568.67	9018.78	10260.4	6890.09	5394.65	6977.84	9333.16	15443.5	13753.4	8190.81	6005.59	9889.21	7984.2	6984.44	8068.92	4528.98	4528.98	4528.98	4528.98	4528.98	4528.98	4528.98	4528.98	4528.98	4528.98	4528.98	4528.98	20580.1	19338.4	18034.5	18132.2	19578.4	20061	11772.5	11879.5	11941.1	11845.2	11758.7	11749.6
166		17768.2	18533.1	19312.3	19924	19883.1	17139.6	10870.6	12776.5	12510.1	10655.1	11916.2	11926.9	7298.86	9098.08	8948.03	7591.42	5213.08	6779.37	8892.55	9396.59	13166	11222.3	6170.93	5678.46	3533.79	3533.79	3533.79	3533.79	3533.79	3533.79	3533.79	3533.79	3533.79	3533.79	3533.79	3533.79	18506.2	20018.4	22227.2	19405	19284.6	21845	5940.74	5912.13	5932.22	5941.88	5941.2	5952.51
167		22755.5	22542.2	24945.1	25996.8	21192.4	22710.2	38682	33017.9	35473.7	39197.7	35935	34010.6	25510.1	32740.9	23960.6	18849.4	18971.9	23209.2	26096.3	22924.2	20959.3	15068.8	18602.2	21536.9	14252.3	14252.3	14252.3	14252.3	14252.3	14252.3	14252.3	14252.3	14252.3	14252.3	14252.3	14252.3	19055.8	19623.9	18869.4	17231	15695.6	16733.5	8865.79	8856.89	8852.49	8895.06	8905.21	8886.71
168		26328	25898.3	27020.7	27708	26585	26347.8	7975.37	7935.95	8204.06	8041.43	8080.87	8228.45	10707	10634	10039.6	11739.9	11969.1	11373.2	11419.2	10648	10975.4	11609.2	10758.8	10040.4	6329.69	6329.69	6329.69	6329.69	6329.69	6329.69	6329.69	6329.69	6329.69	6329.69	6329.69	6329.69	14553	14627.2	14414.5	14039.1	13622.2	13211.2	5285.28	5293.74	5292.65	5299.76	5303.36	5291.73
169		17962.6	18122.3	18384.5	18037.7	18050.1	18459	31566.1	31427.6	31739.1	31985.1	31568.1	31496.5	12999.6	13105.8	13561.4	11736.3	11605.4	12674.2	12909.6	12385.9	12591.3	12654.1	12604.5	12484.5	8417.56	8417.56	8417.56	8417.56	8417.56	8417.56	8417.56	8417.56	8417.56	8417.56	8417.56	8417.56	8998.35	9002.91	9012.63	9029.48	9027.15	9023.94	10113.4	10112.6	10112.7	10113.1	10113.2	10112.8
170		38326.2	39289	38536.2	37395	37372.2	37223.2	12274.3	12244.3	12849	12746.9	12423.4	12208	5213.83	5577.7	6320.06	7309.2	5902.36	5573.59	7431.43	7522.61	7381.65	7024.75	6570.97	9330.61	6081.35	6081.35	6081.35	6081.35	6081.35	6081.35	6081.35	6081.35	6081.35	6081.35	6081.35	6081.35	6945.62	6659.45	6889.05	7192.73	6698.98	6899.63	3626.08	3624.54	3631.26	3634.86	3625.49	3631.6
171		51476.2	47288.8	49344.2	57603.3	51077.8	46036.9	12471.7	13653.2	13497.3	13142.7	13515.3	13355	9320.1	8209.56	9094.25	8876.3	10566.4	9097.59	8071.76	9492.71	5348.11	4359.44	9452.23	10503.9	3159.82	3159.82	3159.82	3159.82	3159.82	3159.82	3159.82	3159.82	3159.82	3159.82	3159.82	3159.82	16386.2	17219.9	18191.7	17155.3	15586.5	14839.3	2710.77	2722.34	2712.87	2700.68	2716.49	2729.63
172		46734.6	46476.1	47261.1	45689.2	44713.9	46815.1	23178	23271	25643	25458.5	24653.8	24499.7	22075.8	22548.4	20486.6	19451	21408.5	21160.5	19777.7	21686.1	20106	21462.9	25953.5	24424.2	14091.8	14091.8	14091.8	14091.8	14091.8	14091.8	14091.8	14091.8	14091.8	14091.8	14091.8	14091.8	9423.74	9208.57	8783.39	9054.77	9206.59	9190.59	14539.1	14516.9	14445.6	14462	14544.5	14539.5
173		38373.7	40044.1	38499.7	34963.9	35177.7	37251.9	13376.6	13296	13364.3	12729.4	12725.1	13447.3	9666.87	9141.76	8505.74	7627.37	8725.41	7176.77	6021.35	7100.26	8374.31	8672.59	8707.35	10979.5	5980.44	5980.44	5980.44	5980.44	5980.44	5980.44	5980.44	5980.44	5980.44	5980.44	5980.44	5980.44	13608.5	13736.1	12969.1	12341.4	13227	12842.5	12405.8	12476.8	12403.2	12386.4	12443.7	12484.6
174		58956	57643	59771.3	61226.6	58309.1	56326.1	7536.94	8197.97	7844.17	7740.05	7854.24	7574.41	7259.29	8162.19	7255.18	5127.58	4550.8	5610.73	6669.95	7599.3	8204.36	7825.68	6748.91	8125.08	4774.2	4774.2	4774.2	4774.2	4774.2	4774.2	4774.2	4774.2	4774.2	4774.2	4774.2	4774.2	16427.4	16195.1	16133.9	16410.2	17436	17431.3	12095.2	12116	12075.9	12092.2	12083.3	12095.4
175		49486.6	51057.5	50337.4	49141.8	48328.4	45869.8	25368.1	26080	25296.9	24963.5	25272	25848.5	24424.6	24057.9	25240.9	24844	25038.9	25270.9	27463.7	27368.6	23027.8	23417.9	23887.1	23264.4	14745.5	14745.5	14745.5	14745.5	14745.5	14745.5	14745.5	14745.5	14745.5	14745.5	14745.5	14745.5	17789.6	17652.2	17210.3	17291.5	18222.1	18463.2	4242.02	4236.23	4230.77	4235.63	4247.41	4245.88
176		45307.8	49287.3	49671.3	49375.7	54718.4	52521.8	35151.2	33877.5	34428.9	37260.3	40291.8	34643.3	15085.8	18160.6	19342.4	20694.7	23609.3	25113.9	23844.2	28466.2	21612	16539.7	16712.4	19036.6	10829.9	10829.9	10829.9	10829.9	10829.9	10829.9	10829.9	10829.9	10829.9	10829.9	10829.9	10829.9	9545.51	9922.52	10768.9	10655.7	10864.1	10466.8	12749.6	12766.2	12790.5	12821.2	12842.3	12819.6
177		38195	38678.8	37836.5	35680.9	36340.4	39996.2	20890.2	19941.6	19294.8	19205.1	19723.9	20895.2	12272.1	7157.8	8483.93	13899.1	15357.6	12852.1	10162.7	9236.33	9999	11604.6	7869.51	7697.49	6505.25	6505.25	6505.25	6505.25	6505.25	6505.25	6505.25	6505.25	6505.25	6505.25	6505.25	6505.25	16075.8	16230	17494.4	17573.3	16538	16484.2	3124.89	3125.18	3119.04	3116.75	3114.23	3113.45
178		35370.7	38045.6	37925.3	35628.3	37604.4	38340.8	7815.03	7401.53	7442.56	7754.65	8392.38	8113.87	4452.86	4182.65	5114.53	5218.1	4421.85	7054.67	8882.49	6904.12	5351.56	5425.34	4597.25	5861.18	5562.98	5562.98	5562.98	5562.98	5562.98	5562.98	5562.98	5562.98	5562.98	5562.98	5562.98	5562.98	15741.3	14869	15026.6	15703.8	15154	15703.5	9521.19	9518.32	9518.05	9515.76	9525.86	9521.93
179		33528.8	35826.1	39877.6	36052.1	36966.2	36488.8	3532.36	3999.1	3973.63	3824.81	3857.01	3855.11	3238.65	2439.72	2477.84	2273.43	3714.21	4247.55	2239.46	2321.07	2939.71	2257.93	1959.69	2738.9	2002.24	2002.24	2002.24	2002.24	2002.24	2002.24	2002.24	2002.24	2002.24	2002.24	2002.24	2002.24	11778.3	11820.7	11807.3	11998.6	12642.4	12560.5	6800.23	6782.93	6800.56	6798.29	6810.37	6814.73
180		25515.7	24295.6	23384.4	25458.5	27396.4	27090.4	5140.75	5031.39	5470.07	4878.64	4331.24	4901.69	3189.92	2972.91	2686.72	3162.18	2511.41	2073.43	2891.78	3036.9	2342.63	3030.89	4004.82	3707.13	2213.68	2213.68	2213.68	2213.68	2213.68	2213.68	2213.68	2213.68	2213.68	2213.68	2213.68	2213.68	9510.53	9583.35	9549.58	8849.85	9047	10275.2	8222.99	8212.95	8213.21	8167.24	8159.6	8153.29
181		32275.1	30801.5	31389.2	33960.1	34880.6	33437.4	12321.3	12692.9	12214.9	12194.4	12283.1	12309	6714.82	6923.09	6742.88	7033.92	7819.99	7965.51	7067.06	6533.81	6979.83	5598.02	6159.21	5038.87	3064.4	3064.4	3064.4	3064.4	3064.4	3064.4	3064.4	3064.4	3064.4	3064.4	3064.4	3064.4	13994.5	14530	14466.4	13349.3	14109.8	14994.4	7502.33	7509.18	7508.17	7499.19	7489.06	7497.94
182		46128.6	45405.7	43426.8	42673.6	47334.7	49364.2	1072.08	1081.7	1144.03	1126.42	1079.85	1085.99	604.247	691.861	654.14	569.926	728.351	606.708	504.604	632.913	668.48	713.41	696.994	667.048	388.757	388.757	388.757	388.757	388.757	388.757	388.757	388.757	388.757	388.757	388.757	388.757	10321.6	9774.6	9838.75	9825.02	10834.4	12019.4	13529.5	13412	13506.4	13600.4	13493.1	13543.5
183		36796.2	36495.6	38276.4	39969.2	38260.3	37609.8	33811.8	33039.3	34255.5	34564.1	32329.4	32981.3	21433.4	29095.3	26967.8	21187.3	18696	15376.8	15193.9	18067.1	29225.5	31296.3	33040.6	25678.4	12272.5	12272.5	12272.5	12272.5	12272.5	12272.5	12272.5	12272.5	12272.5	12272.5	12272.5	12272.5	16302.8	15354.6	15170.9	16323.9	15661.5	15191.3	10823.8	10816	10802.1	10857.7	10874.5	10830
184		19015.6	20333.1	22592.5	21328.6	21861.5	20938.1	25970	26997	27366.2	27882	26998.9	28159.4	22521.5	15497.7	15212.2	23810.1	20003.3	13248.3	15696.7	18771.9	15818	11010.1	10172.1	14743.2	11833.8	11833.8	11833.8	11833.8	11833.8	11833.8	11833.8	11833.8	11833.8	11833.8	11833.8	11833.8	21078.5	20407.7	19466.3	20283.9	21269.7	21019.3	7394.51	7399.52	7452.69	7452.07	7464.95	7460.76
185		46616.2	46584.9	40904.1	44063.8	48855.6	40386.8	4574.27	4964.44	4643.52	4524.31	4230.19	4210.13	3675.15	4097.77	3158.95	2190.97	2086.27	3851.75	4981.87	2978.31	3317.36	3095.51	3784.32	4020.65	1514.91	1514.91	1514.91	1514.91	1514.91	1514.91	1514.91	1514.91	1514.91	1514.91	1514.91	1514.91	19260.1	19488	19495.6	18354.4	19233.4	19157.1	10018.7	10100.9	10048.7	10042.1	10089	10026.1
186		20194.8	18464.4	17486.5	18987.6	18009.5	16282.8	7095.23	7584.14	7420.62	7402.16	7766.79	7639.5	4021.61	5855.04	5855.98	4696.26	5400.18	6089.56	5600.32	5782.97	5758.32	4311.03	3225.07	4261.61	3226.74	3226.74	3226.74	3226.74	3226.74	3226.74	3226.74	3226.74	3226.74	3226.74	3226.74	3226.74	15748.6	16015.2	15510.5	15212.6	15612.1	15376.5	8874.57	8883.11	8881.53	8878.71	8872.32	8869.71
187		38850.3	38991.6	40049.4	40718.7	39429.4	38442.9	33665.3	33530.8	32340.7	33744.3	33849.1	33126.3	32464.1	30845.4	33625.7	35248.4	42470.9	43414.3	41025.7	34704.5	29326.3	31726.2	32729.6	29180.8	17887.9	17887.9	17887.9	17887.9	17887.9	17887.9	17887.9	17887.9	17887.9	17887.9	17887.9	17887.9	16109.3	16382.7	16920	17066.6	17126.6	16936.5	3956.68	3962.23	3972.08	3955.17	3948.7	3946.21
188		31594.8	30427.3	28383.6	28890	28757.7	28539.5	26529	27032.9	25794.5	24660.1	25721.3	26870.6	13877.5	10579.4	12408.9	14557.9	14771.9	17926.2	19861.8	17756.5	12561.7	13843.3	14532.4	11467.7	9194.55	9194.55	9194.55	9194.55	9194.55	9194.55	9194.55	9194.55	9194.55	9194.55	9194.55	9194.55	18613.6	19570.8	18083.6	15792.6	16238.5	18858.6	9709.54	9677.01	9680.56	9630.59	9604.71	9577.61
189		51937.9	53976.7	54234.9	49052.4	52929.5	60554	21068.7	21068.6	20369.9	19562.3	19799.4	19477.4	17378	18886.4	18147.4	16212	18434.3	23957.8	20786.2	19108.8	19204.6	17373.9	16114.1	15009.2	10815.5	10815.5	10815.5	10815.5	10815.5	10815.5	10815.5	10815.5	10815.5	10815.5	10815.5	10815.5	9846.63	8949.67	8672.71	9735.95	9084.41	9638.98	8980.11	8912	8898.07	8891.49	8904.94	8922.95
190		34180.9	34655.3	33915.4	33473	34608.8	34852	22834	22802.5	22454.5	22157.5	22327.1	22035	23338.8	24395.6	26008.1	25224.3	23593.2	24663	25718.6	25541.5	27149.1	26076.5	25526.5	25904.8	15771.2	15771.2	15771.2	15771.2	15771.2	15771.2	15771.2	15771.2	15771.2	15771.2	15771.2	15771.2	9756.2	10079.9	11159.8	10383.3	8834.14	9809.15	16372.2	16275.8	16534.3	16528.1	16412.7	16386.6
191		64557.2	64224.2	64882.8	63384.5	62469.1	65049.6	12421.7	12287.8	12328.8	12192.9	12270.4	12244.8	12027.4	12878.3	13008.1	13597.8	11825.1	13242.6	13078.8	11185	11612.9	12844.8	12124.5	12770.3	8763.33	8763.33	8763.33	8763.33	8763.33	8763.33	8763.33	8763.33	8763.33	8763.33	8763.33	8763.33	19867.2	20151.8	20401.7	20508.8	20413.3	21710.5	8807.8	8761.61	8737.38	8714.12	8754.72	8747.01
192		29937	30124	33251	34824.1	33836.1	31669.6	53695.4	56851.9	56818.9	54087	53856.1	53684.5	47913.9	53624.8	50102.1	47809.5	52597	50589.4	54440	57338.7	52923	59899.7	62879.7	57104	33536.2	33536.2	33536.2	33536.2	33536.2	33536.2	33536.2	33536.2	33536.2	33536.2	33536.2	33536.2	11667.5	11582.4	12298.8	13065.4	12583.1	12261.1	6994.09	6992.73	7001.7	7027.81	7007.56	6962.83
193		62382.3	63562.2	64926.7	64019.2	60684.9	59187	5330.17	5229.1	5172.44	5262.46	5392.82	5433.06	6239.08	6630.83	5899.71	5501.08	5547.35	5939.66	5630.96	5708.49	6065.05	5939.94	5768.23	6201.72	3758.04	3758.04	3758.04	3758.04	3758.04	3758.04	3758.04	3758.04	3758.04	3758.04	3758.04	3758.04	14818.7	14899.9	15217.3	15354.4	15419.9	15360.6	5821.58	5819.77	5827.45	5828.62	5825.57	5824.41
194		48340	49861.4	48675.6	46326.3	49471.2	50119.6	21634.7	23803.5	22642.2	21555.2	24629.3	23307.4	18534.8	20386.5	10118	7097.41	17696.3	27597.9	13020.3	12127.8	14123.4	10875.7	16347.5	17268	10137	10137	10137	10137	10137	10137	10137	10137	10137	10137	10137	10137	5825.02	5972.43	6698.14	6895.13	6212.93	5582.27	11041.1	11119.4	11094.7	11094.9	11073.7	11067.2
195		47153.2	49073.7	52290.7	47442.2	48393.7	49272	38489.8	42595.8	45069.1	44091.1	43105.8	40235.5	19504.2	27681.9	32886	22001.5	19951	18358.3	18473.1	25162.6	35585.8	40098.4	29097.3	25369.2	11555.9	11555.9	11555.9	11555.9	11555.9	11555.9	11555.9	11555.9	11555.9	11555.9	11555.9	11555.9	16448.5	15817	14938.5	14842.6	15764.6	16752.3	8876.97	8850.37	8893.8	8903.67	8915.4	8891.66
196		41270.8	39559	42124	44172.8	47830.6	55212.1	23353.8	22064.4	20157	20400.9	21229.8	21852.9	19659.7	17805.5	13748.3	10975.8	12921.2	9762.7	12312.8	15022.9	11907.1	13402.1	17354.6	16018.1	9924.2	9924.2	9924.2	9924.2	9924.2	9924.2	9924.2	9924.2	9924.2	9924.2	9924.2	9924.2	21142.8	21245.7	21186.3	21614.1	21720.5	20632.9	7924.38	7929.58	7925.29	7922.31	7908.78	7929.25
197		34254.6	33778.8	34095.5	35338.6	35917.2	35090.3	25816.2	25777.8	25532.9	25860	25952.4	25352.6	9568.22	11217.9	11976.4	10287.7	10571.2	10034.9	9515.89	11045.1	11762.1	11510.1	12115	10391.8	7621.17	7621.17	7621.17	7621.17	7621.17	7621.17	7621.17	7621.17	7621.17	7621.17	7621.17	7621.17	9099.29	8933.68	8929.73	9068.1	9085.63	8963.72	6702.77	6711.42	6709.82	6708.63	6707.7	6712.34
198		29290.3	30233.2	31156.2	28621.8	26662	27764.4	26237	27143.5	27580.9	27150.7	28092.8	27318.5	21911.1	22893.8	24591	25508.7	26174.4	24347.4	23142.1	23598.5	23134.7	24811.6	23434.7	20327.6	13261.3	13261.3	13261.3	13261.3	13261.3	13261.3	13261.3	13261.3	13261.3	13261.3	13261.3	13261.3	19300	19575	21281	21794.5	19924	19783.7	7583.75	7554.48	7601.26	7630.79	7606.08	7592.07
199		53500.9	52427.1	51734.5	52520.1	49655	52913.1	7869.02	7260.75	6647.46	6792.76	6959.02	6778.86	5941.55	7796.44	7070.89	6647.25	7036.58	7098.17	9288.92	6470.71	5698.76	6036.33	5109.49	5240.69	4094.28	4094.28	4094.28	4094.28	4094.28	4094.28	4094.28	4094.28	4094.28	4094.28	4094.28	4094.28	17386.2	18164.9	18222.1	17590.2	16840.7	16243.8	10301.2	10292.4	10302.5	10316.1	10312.8	10320.4
200		54958.6	56489.1	59358.5	60695.6	66077.3	63704.3	57362.2	59961.3	62200.2	61466.3	61526.4	55093.6	35974.4	59742.8	60502.2	38115.9	32036.1	43858.1	53850	65534.1	58343.4	42995.3	44758.7	49026.9	33713.2	33713.2	33713.2	33713.2	33713.2	33713.2	33713.2	33713.2	33713.2	33713.2	33713.2	33713.2	15591.1	15591.1	15591.1	15591.1	15591.1	15591.1	9643.73	9643.73	9643.73	9643.73	9643.73	9643.73
201		42011.8	40252.4	39193.6	40916.9	46385.5	43606.1	16003.9	17498.6	18213.9	18745.2	19109.8	17968.3	12708.8	10145.6	8765.89	10904.9	11204.5	13993.8	14707.8	9376.1	7794.46	11638.6	10074.4	9467.03	8824.2	8824.2	8824.2	8824.2	8824.2	8824.2	8824.2	8824.2	8824.2	8824.2	8824.2	8824.2	16449.7	16244.2	15945.3	15525.2	15627.9	16186.8	4586.63	4594.82	4599.7	4585.61	4585.02	4592.86
202		36947.9	37696	37512.4	36681.1	37318.3	37589.7	5895.46	5809.27	5785.94	5677.4	5687.16	5876.4	6637.94	6867.27	6934.79	7147.73	6487.82	6058.11	6232.1	6199.28	6117.61	6443.62	6181.13	6116.61	3680.52	3680.52	3680.52	3680.52	3680.52	3680.52	3680.52	3680.52	3680.52	3680.52	3680.52	3680.52	10550.9	11285.6	11210.8	10008.7	10099.2	10651.7	13633.9	13574.5	13699.6	13719.5	13605.4	13656.7
203		50533.5	51802	49632	45174.1	50673.6	52395	55369.1	59974.5	57833.7	56840.4	59996.7	60566.6	51517.2	38305.8	42473.8	41526.5	52174.6	67568.1	39215.3	35695.1	51605.4	47731.7	38069.8	42807.5	22519	22519	22519	22519	22519	22519	22519	22519	22519	22519	22519	22519	15159.4	15425.5	15631.2	15417.1	15313.3	15120.8	13753.6	13773.4	13749.5	13717.9	13716.5	13742
204		51957.8	53267.6	54343	53615	54260.5	52519.5	41390.7	42439.8	42217.5	41569.7	41528.3	41176.2	41726	42573.4	43390.7	48166.8	46443.6	44246.1	47810.9	45551	43005.7	42982.4	42526.6	42863	29241.7	29241.7	29241.7	29241.7	29241.7	29241.7	29241.7	29241.7	29241.7	29241.7	29241.7	29241.7	17110	16899.6	18070.9	19459.5	20536.5	20431.1	12285.4	12284.7	12350	12308.8	12261.2	12312.9
205		51749.6	50359.3	47070.7	50855.1	49198.4	44532	23153	24448.2	23653	22184.2	24107.7	24102.9	19568.5	19680.8	22885.2	23329.7	22343.2	20112.6	18924.9	19900.2	21963.7	20156	19085.9	21834.1	12122.3	12122.3	12122.3	12122.3	12122.3	12122.3	12122.3	12122.3	12122.3	12122.3	12122.3	12122.3	14726.7	14537.2	14929.4	15475.8	14902.5	14130.6	5868.35	5884.05	5869.92	5870.38	5888.63	5882.18
206		25534.8	25406.4	24405.5	24504.3	23303.7	23032	8620.41	9045.78	9386.38	8780.75	8378.39	8537	8479.01	6910.28	5953.03	6791.51	6746.28	6514.51	7649.15	7037.28	6313.06	6323.45	7854.96	8541.07	4069.69	4069.69	4069.69	4069.69	4069.69	4069.69	4069.69	4069.69	4069.69	4069.69	4069.69	4069.69	10415.8	10207.4	10257.9	10381.8	10339	10489.9	2288.11	2288.01	2292.8	2292.55	2289.07	2290.18
207		40507.2	39378.9	36906.4	34704	37233.8	41667	5050.6	5151.4	5201.96	5015.96	5194.71	4879.29	3672.72	5942.6	4542.42	2949.54	3395.2	6388.76	4739.21	3170.88	2947.4	2928.32	3037.99	3554.27	2852.69	2852.69	2852.69	2852.69	2852.69	2852.69	2852.69	2852.69	2852.69	2852.69	2852.69	2852.69	12705.9	12779.1	14345.6	14170.8	12200.6	13487.6	7088.95	7045.9	7038.5	7064.33	7127.71	7108.43
208		46907.2	44669.7	41132.7	44195.2	52895.6	46327	20765.8	22377.2	22875.5	22976.8	23927.5	23164.1	17406.8	19115.3	10861.1	12456.8	14716.1	22034.7	24473.8	18461.6	15790.2	16168.4	16799.3	12781.8	5762.8	5762.8	5762.8	5762.8	5762.8	5762.8	5762.8	5762.8	5762.8	5762.8	5762.8	5762.8	21924.1	22701.6	23075.3	21944.5	23082.5	23194.4	9247.86	9286.69	9300.73	9270.89	9271.19	9264.42
209		38254.2	37799.3	41179.2	43294.1	41010.4	41667.7	58493.1	55608.4	56897	59145.6	61009.8	59846.4	47680.5	45878	51433.1	69325.6	66826.9	60946.6	48841.3	45432.8	67851.9	77124.3	56048.8	51858.6	36769.6	36769.6	36769.6	36769.6	36769.6	36769.6	36769.6	36769.6	36769.6	36769.6	36769.6	36769.6	15676.1	15771.5	15944.5	16181.3	16016	15466.9	6083.72	6094.92	6094.81	6090.52	6091.06	6086.79
210		34245.5	32060.7	29666.9	32183.3	36544.6	35721.3	17290.7	16866.9	17262.4	18375.9	16686.1	16149.8	18046	18335.4	12826.9	13197.2	15344.9	15504.5	14447.7	11562.2	12801.4	14655.7	12365	13389.9	7806.56	7806.56	7806.56	7806.56	7806.56	7806.56	7806.56	7806.56	7806.56	7806.56	7806.56	7806.56	17714.3	19129.4	19821	18894.1	18479.4	18324.5	11908.8	11854.1	11840.1	11831.5	11779.4	11813
211		20324.7	20573.9	20872.8	21353.1	21871	21098.9	17677.8	17408.2	17485.5	18053.9	18039.6	17900.7	19882.5	19764.9	20273	20190	19683.8	20035.5	20475.4	20085.6	19795.3	19008.1	19347.9	20860	11807	11807	11807	11807	11807	11807	11807	11807	11807	11807	11807	11807	4210.9	4206.59	4212.44	4197.27	4285.99	4373.33	4911.89	4901.84	4893.37	4905.59	4916.24	4915.55
212		48561.8	49006.5	50373.5	46878.6	47234	48690.5	11998	12631.4	13590.8	13601.1	14310.9	14475.9	13256	12534.3	12368.1	12140.7	11708.1	11304	13721.2	14427.8	11230.4	12042.4	11791.1	10219	7736.87	7736.87	7736.87	7736.87	7736.87	7736.87	7736.87	7736.87	7736.87	7736.87	7736.87	7736.87	13015	12643	13132.4	13593.1	13230.6	12891.6	9622.03	9628.92	9593.31	9641.09	9637.94	9625.35
213		41414.8	41977.7	42523.3	41300.1	40456.3	39784.3	2031.53	2156.63	2276.55	2197.54	2193.85	2279.29	951.086	842.005	1190.79	1123.95	2125.08	1758.92	1046.82	1202.49	1148.71	1292.83	1066.67	817.471	624.545	624.545	624.545	624.545	624.545	624.545	624.545	624.545	624.545	624.545	624.545	624.545	6994.29	6616.53	5713.07	5904.27	6839.57	6973.75	12262.5	12224.2	12155.4	12217.1	12245.7	12255
214		42325.5	43314.7	46376.9	45648	42821.3	40514.9	16535.1	17455.6	17278.1	16335.3	16826.1	17089.7	6905.74	8899.91	13505.5	12718.9	11869.5	16793.8	10671.3	9463.16	15169.6	10093.1	8605.98	9303.74	5533.45	5533.45	5533.45	5533.45	5533.45	5533.45	5533.45	5533.45	5533.45	5533.45	5533.45	5533.45	13294.3	13685.8	12430.3	12301.5	12883.5	12413.5	8315.89	8315.27	8294.96	8291.59	8301.76	8272.29
215		38452.9	38214.7	33930.5	35387.4	37696.4	34187	17921.4	18699.3	18319.8	17787	19325.5	18673.6	13019.2	12178.2	13057.4	14073.6	13052.4	14476.4	14085.7	11675.5	12277.4	12057.9	12252.6	15434.3	8906.5	8906.5	8906.5	8906.5	8906.5	8906.5	8906.5	8906.5	8906.5	8906.5	8906.5	8906.5	15627.9	15657.5	16170.2	16538.2	15503.6	14853.8	9836.63	9862.08	9896.48	9891.62	9895.33	9878.35
216		45253.4	46840.7	47018.6	42814.5	43619	48492.8	35392.5	37298	41433.2	35419.6	33229.8	35384.1	30980	33976.9	30097.1	29540.9	35742.4	38662.7	42030	42139.6	31498.5	24604.7	23739.1	24173.3	14426.7	14426.7	14426.7	14426.7	14426.7	14426.7	14426.7	14426.7	14426.7	14426.7	14426.7	14426.7	9760.61	9838.91	8522.55	8095.28	9064.06	9092.59	2619.71	2610.64	2617.92	2620.01	2612.87	2630.58
217		66245.8	64957.3	58282.2	54173.4	54731.9	60366.5	48394.3	48513.6	47620	49186.5	47514.6	43729	44063.1	48659.3	41742	44531.6	44627.4	41505.7	45310.4	42517.4	38104.4	36161.4	37557.9	38666.4	20299.7	20299.7	20299.7	20299.7	20299.7	20299.7	20299.7	20299.7	20299.7	20299.7	20299.7	20299.7	17395.3	16356	16467.5	18464.1	18454.6	17935.9	5036.01	5011.37	5000.52	5018.53	5048.59	5062.1
218		40888.4	44384.1	51381.4	43152.8	38921.7	45078.4	32066.2	31295	31301.7	32180	32083	30034.9	17854.9	21448.3	17297	23211.5	33189.2	24968.7	18579.6	16287	16649.4	15316.7	19975.4	27797.3	17040.3	17040.3	17040.3	17040.3	17040.3	17040.3	17040.3	17040.3	17040.3	17040.3	17040.3	17040.3	4162.12	4140.81	4194.37	4111.39	4097.58	4412.56	11800.5	11766.9	11767.6	11779.1	11787.2	11765.4
219		60807	59651	58629	59341.5	59279.6	62750.6	42208.4	41649	42590.3	40258.8	41376.1	45478.8	46650.1	30259.5	24444.2	31197.2	37529.4	36279.9	43550.7	31724.8	27801.6	27200.6	32493.1	44966.9	23128.9	23128.9	23128.9	23128.9	23128.9	23128.9	23128.9	23128.9	23128.9	23128.9	23128.9	23128.9	14076.5	14019.5	13327.9	12555.3	12153.9	13249.7	7711.62	7681.28	7666	7678.97	7682.49	7699.77
220		18706	20087	20061.1	18304.9	20193.1	21165	52822.5	53807.9	52255.3	49274.3	46310	47524.1	30813.4	22630.3	24110.9	32744.1	35885	43385.2	34183.7	35988.8	44811.3	21351.5	18105.2	31901.5	20704.6	20704.6	20704.6	20704.6	20704.6	20704.6	20704.6	20704.6	20704.6	20704.6	20704.6	20704.6	14979.9	14590.7	14310	15129.2	15715.1	15617.3	11738.6	11749.4	11700.5	11641	11677.7	11702.5
221		40274.1	41357.4	44210.6	44478.7	41659.7	43488.8	22698.2	21507.2	21854.7	22173.6	23916.1	23643.9	12481.4	11521.4	14897.8	22788.3	20654.5	13104.5	11259.6	10659.6	14699.9	17888.4	11518.2	8296.78	5932.81	5932.81	5932.81	5932.81	5932.81	5932.81	5932.81	5932.81	5932.81	5932.81	5932.81	5932.81	14922	15056.8	14879.2	14837.6	15015.2	14905.8	7488.78	7487.47	7487.03	7494.57	7495.92	7482.15
222		32907	32961.6	32925.6	32954.5	33172.7	33204.6	137.835	137.656	139.265	140.428	138.845	137.211	56.5881	60.3169	56.6209	54.1188	54.8838	54.9755	56.5023	60.6593	56.1424	53.1102	56.472	56.4981	37.451	37.451	37.451	37.451	37.451	37.451	37.451	37.451	37.451	37.451	37.451	37.451	16625	16345.9	17740.3	18642.2	17315.8	17496.9	6668.95	6677.07	6679.6	6657.95	6645.54	6656.74
223		49553.1	51959.4	53431.6	50413.8	45977.6	50885.3	41765.9	41422.9	46709.5	44419.2	41478.5	39598.9	34198.3	37269.1	30941.6	28262.7	22203.9	20836.1	23813.4	24528.6	19848.7	23096.9	33240.4	47024.2	36623.7	36623.7	36623.7	36623.7	36623.7	36623.7	36623.7	36623.7	36623.7	36623.7	36623.7	36623.7	19485.3	19630.9	19713.3	19423.1	19411.8	19485.6	10966	10970.3	10966.8	10969.9	10968.4	10964.9
224		47089.6	46104.5	42560.5	44088	44583	43972.6	25870.4	25324.5	25015.1	24473	25662.3	25965.7	23096.2	21205.1	17762.9	22655	29617.3	19841.2	14723.7	18498.6	26751.5	21979.6	21447.7	20138.1	12565.2	12565.2	12565.2	12565.2	12565.2	12565.2	12565.2	12565.2	12565.2	12565.2	12565.2	12565.2	13434.8	13810.5	13299.2	13366.8	13912.3	12501.2	9192.99	9278.97	9271.85	9188.85	9208.1	9232.25
225		32908.8	32614.5	33032.6	35664	31975.2	27844.7	6172.48	6607.39	7175.4	6493.31	6266.31	6769.59	4983.58	4616.22	3163.58	2641.85	3803.31	6800.82	6226.67	4887.35	5209.77	3775.34	3579.62	5380.53	2417.62	2417.62	2417.62	2417.62	2417.62	2417.62	2417.62	2417.62	2417.62	2417.62	2417.62	2417.62	24293.9	22699.3	19826.9	20108	20892.5	22792.7	5127.7	5108.77	5118.75	5090.78	5118.52	5129.89
226		22057.2	23764.3	25165.9	24819.2	24386.1	21920.2	14292	15049.2	14206.8	14377.4	14687.1	14035.6	9431.32	9556.89	10253	10004.1	11915.8	13739.7	12198	10995.6	12253.3	12667.8	14260.4	18747.5	7936.96	7936.96	7936.96	7936.96	7936.96	7936.96	7936.96	7936.96	7936.96	7936.96	7936.96	7936.96	18493.9	19236.3	18238.8	17042.3	18041.8	17639.2	13330.8	13383.9	13382	13370.8	13358.5	13366.9
227		28429.7	27176.2	24369.5	28524.6	31716.3	29397.6	44346.7	40181.2	43907.5	49603	45497.1	42942.5	39979.9	37987.3	21526.5	17489.3	22812.1	22982.8	18989.5	24447.3	28073.3	17833.6	13969.3	19094.8	18394.8	18394.8	18394.8	18394.8	18394.8	18394.8	18394.8	18394.8	18394.8	18394.8	18394.8	18394.8	4330.83	4385.85	4701.61	4735.83	4433.14	4417.9	9095.34	9090.92	9069.54	9089.02	9058.89	9042.34
228		57052.5	52289.1	49578.4	47600.1	45818	50288.7	797.094	850.653	762.453	704.744	718.921	760.938	621.334	679.806	591.838	410.514	382.774	426.786	459.747	604.124	670.328	399.062	439.26	752.485	287.209	287.209	287.209	287.209	287.209	287.209	287.209	287.209	287.209	287.209	287.209	287.209	25339.7	24854.2	22521	21592.9	21629.8	22395.3	9814.31	9815.74	9836.64	9839	9809.78	9830.04
229		49942.7	49982.6	52511.1	51097.5	45680.5	47413	32152.9	35832.2	35758.8	31656.4	30955.4	30210.8	26583.6	25526.3	22253.3	30318.9	24059.1	21261.5	22240.6	27163.9	29193.6	18052.9	17386.3	29786.6	16222.8	16222.8	16222.8	16222.8	16222.8	16222.8	16222.8	16222.8	16222.8	16222.8	16222.8	16222.8	20776.8	19636.6	21224.2	23825.8	22583.2	19655	11250.1	11333.2	11423.9	11456.7	11360.1	11337.3
230		12448.7	13475.9	14602.6	14035.6	14931.2	14118.8	24002.9	23371.9	22940.7	22203.9	22325.5	26213.9	22144.9	13824.3	12317.8	21460.2	26835.9	14911.5	13981	24936	26668.5	16746.8	16541.3	33533.7	15884.3	15884.3	15884.3	15884.3	15884.3	15884.3	15884.3	15884.3	15884.3	15884.3	15884.3	15884.3	17948.9	16872.5	16926.4	18240.2	17964.1	18701.6	4573.62	4555.55	4539.96	4528.06	4508.22	4506.14
231		56297.6	55819.6	57156.1	54233.5	54814.9	56942	32623.5	32524.9	27824.3	27115.3	25737.7	29765.2	38688.8	23444.8	16391.3	19064.9	16792.5	21786.9	32486.8	28678	25918.9	22238.2	14674.1	12060.9	12728.9	12728.9	12728.9	12728.9	12728.9	12728.9	12728.9	12728.9	12728.9	12728.9	12728.9	12728.9	11368.7	11490.1	11448.9	11539.4	11319.3	11365.3	11438.5	11426.1	11438.2	11431.7	11407.7	11405.2
232		34877.8	33493.9	31039.3	31765.6	37590.9	36344.1	5094.29	5406.69	4893.96	5044.2	5120.14	5071.85	5747.41	3674.56	3288.98	5502.1	5390.2	4628.19	5063.35	4294.56	3212.54	3046.47	3033.66	3329.11	2071.35	2071.35	2071.35	2071.35	2071.35	2071.35	2071.35	2071.35	2071.35	2071.35	2071.35	2071.35	10504.3	10004	9603.75	9886.13	10506	10578	4006.94	4003.13	4000.78	4014.44	4020.96	4014.6
233		56275.5	55618.8	48147.8	47654.8	45781.6	45236.2	31366.6	32151.1	34308.9	32780.2	32857.2	30272.2	18013.2	27488.3	25571.2	22072.9	19700.5	21391.5	24303.5	30830.9	28932.9	19731.7	19370.7	22583	17133.7	17133.7	17133.7	17133.7	17133.7	17133.7	17133.7	17133.7	17133.7	17133.7	17133.7	17133.7	12760.9	13783.9	12826.9	11735.9	11698.7	10918.9	7910.85	7912.69	7861.09	7876.05	7900.74	7911.21
234		57281.4	52440.8	49479.5	56278.8	63374.2	65095.4	69848.8	65146.2	64181.9	65406.6	64966.2	69471.8	48200.8	42826.5	40515.8	35424.1	33052.5	25613.4	40657.6	51537.9	28717.8	32198.3	46241.7	41994.5	40557.2	40557.2	40557.2	40557.2	40557.2	40557.2	40557.2	40557.2	40557.2	40557.2	40557.2	40557.2	14153.3	14368.9	15380.9	15153.6	15634.4	15771.2	6368.47	6397.64	6387.17	6367.39	6399.53	6413.77
235		35497.3	36391.2	37324.8	37175.9	35681.9	35787.8	490.198	487.574	471.399	440.053	454.217	493.561	341.281	292.019	265.268	332.915	297.673	271.953	377.566	266.696	236.442	240.231	286.45	350.319	143.953	143.953	143.953	143.953	143.953	143.953	143.953	143.953	143.953	143.953	143.953	143.953	21476.3	21380.4	21356.8	21927.1	22107.5	22135.1	7029.89	7018.65	7024.14	7028.8	7036.75	7025.39
236		46561	46098.3	48581.1	48213.7	44251.8	44127	28598.2	29411.5	29094.2	28073.3	26954.6	27683.1	13389.5	12879.9	14826.7	18483.4	15296.7	11657.7	12287.8	14146.5	16034.3	18703.2	14743.8	11208.8	9407.22	9407.22	9407.22	9407.22	9407.22	9407.22	9407.22	9407.22	9407.22	9407.22	9407.22	9407.22	20072.7	18072.3	16580.3	18456.1	19134	19152.2	11227	11194.3	11231.2	11248.9	11240.6	11261.4
237		28553.9	28553.9	28553.9	28553.9	28553.9	28553.9	41583	41583	41583	41583	41583	41583	15505.5	15505.5	15505.5	15505.5	15505.5	15505.5	15505.5	15505.5	15505.5	15505.5	15505.5	15505.5	10806.9	10806.9	10806.9	10806.9	10806.9	10806.9	10806.9	10806.9	10806.9	10806.9	10806.9	10806.9	12622.8	13058.1	13600.8	13395.1	13190.7	12562.3	7056.78	7074.76	7050.59	7046.95	7057.05	7056.31
238		16141.9	16650.6	17499.3	16629.5	17657.7	18746.9	64357.3	64077.9	65132.6	64005.3	60948.8	61874.5	60872.5	61720	60118	60640.4	52203.2	53744.3	54578.2	48549.9	48910.1	59700.8	62969.1	57739.8	39193.4	39193.4	39193.4	39193.4	39193.4	39193.4	39193.4	39193.4	39193.4	39193.4	39193.4	39193.4	5056.47	5011.2	5091.37	5199.44	5112.51	5031.21	16564.2	16547.4	16571.1	16640.2	16624.4	16573.9
239		28385.8	26500.3	28216.7	28377.1	25378.9	25378.1	5519.6	5702.33	5567.72	5939.2	5921.05	5617.51	4050.94	4460.29	3439.15	4001.17	4937.23	4450.44	4598.41	4877.52	2926.79	2609.65	3694	4233.11	2359.97	2359.97	2359.97	2359.97	2359.97	2359.97	2359.97	2359.97	2359.97	2359.97	2359.97	2359.97	14400.6	13538.7	13640.7	14839.4	15293	15256.7	8870.62	8900.05	8894.04	8849.52	8874.69	8906.04
240		47214.3	49440.4	53435.4	52616.3	50824.2	51030.5	37061.3	34447.9	34689.7	36684.8	38073.7	37036	29386.8	53355.1	29046.3	19170.6	22572.7	25595.4	27874.3	18075.6	11949.4	12286.7	19162.7	20264.5	13563.5	13563.5	13563.5	13563.5	13563.5	13563.5	13563.5	13563.5	13563.5	13563.5	13563.5	13563.5	9227.1	9227.1	9227.1	9227.1	9227.1	9227.1	6383.33	6383.33	6383.33	6383.33	6383.33	6383.33
241		50716.8	49206.7	43799	42186.2	42928.3	43589.7	24517.6	24774.6	23312.6	23085.8	24248.5	24161.9	10049.9	13202.4	16562.2	13649	12127.8	12021.3	15053.6	16605.4	15569.7	18946.6	15091.9	11612.6	7003.16	7003.16	7003.16	7003.16	7003.16	7003.16	7003.16	7003.16	7003.16	7003.16	7003.16	7003.16	19056.1	18987	19129	19758.6	20786.7	21369.1	10041.6	10001.9	9977.92	9952.39	10043.3	10093.1
242		27384.4	24615.2	22951.4	25696.3	27655.4	27662.5	36275	36253.3	38995.9	39057.5	35928.4	37155.6	28915.9	23479.1	24889.5	27249.8	22114.5	18636.7	25519.5	27726.6	19540.9	26198.3	26754.5	20134	15651.3	15651.3	15651.3	15651.3	15651.3	15651.3	15651.3	15651.3	15651.3	15651.3	15651.3	15651.3	12875.1	12525.4	13030	12865.6	12393.7	13792	9313.81	9276.37	9284.59	9283.68	9266.98	9291.23
243		52910.8	57775.7	63224.3	58921.7	57938.9	57106.4	10630.5	10521	10416.3	11076.2	10409.3	10531	11267	8613.97	7828.12	7281.4	7393.65	7799.99	6694.4	7364.79	10788.5	7665.57	7325.38	8904.08	6413.5	6413.5	6413.5	6413.5	6413.5	6413.5	6413.5	6413.5	6413.5	6413.5	6413.5	6413.5	18709	19652.4	20639.3	18831.5	18582.2	17740.2	5061.57	5100.34	5121.4	5125.35	5127.71	5132.57
244		60280.4	58729.7	61565.8	63800.6	59455	60584.6	33846	33830.4	32206.1	30566.4	32469.6	34132.5	31197.2	28551.4	28831.4	29158.8	32785	39263.2	34222.8	23965.1	23380.7	37792.9	42238.3	33408.6	17769.9	17769.9	17769.9	17769.9	17769.9	17769.9	17769.9	17769.9	17769.9	17769.9	17769.9	17769.9	19972.1	18793.1	18102.5	20347.1	21641.7	20253.5	6527.97	6543.32	6560.73	6537.69	6537.68	6559
245		25337.5	25274.5	25237.7	25200.2	25239.2	25282	12336.4	12403.2	12407.5	12351.7	12287.4	12324	4877.42	4942.63	4850	4729.3	4678.76	4622.61	4705.76	4789.26	4786.87	4752.11	4751.32	4817.89	3279.87	3279.87	3279.87	3279.87	3279.87	3279.87	3279.87	3279.87	3279.87	3279.87	3279.87	3279.87	16218.9	16014.6	15990	15737	14829.2	15200.8	2319.82	2319.5	2320.28	2318.29	2320.59	2325.62
246		10174.5	10174.5	10174.5	10174.5	10174.5	10174.5	19690.8	19690.8	19690.8	19690.8	19690.8	19690.8	7342.35	7342.35	7342.35	7342.35	7342.35	7342.35	7342.35	7342.35	7342.35	7342.35	7342.35	7342.35	5117.39	5117.39	5117.39	5117.39	5117.39	5117.39	5117.39	5117.39	5117.39	5117.39	5117.39	5117.39	14283.2	15157.6	14911.9	14030.9	14490.2	14086.9	10138	10148.1	10052.1	10041.2	10124.4	10097.8
247		58732.1	57575	58853.5	61102	61899	62227.3	26768.8	27056.7	28221.3	27766.6	26347.3	27127.9	32120.2	27767.5	29941.9	30577.8	27487.4	32828.7	28379.2	24773	26349.8	26221.8	27758.6	29318.5	15200.2	15200.2	15200.2	15200.2	15200.2	15200.2	15200.2	15200.2	15200.2	15200.2	15200.2	15200.2	20187.4	20101.3	19812	19384.6	19436.3	19814.1	9205.48	9218.17	9235.95	9212.28	9223.39	9239.98
248		37755.8	34826.5	32618.9	35575.5	35772.7	33920.7	604.296	639.938	697.64	630.711	598.22	653.466	711.322	754.858	600.164	598.989	419.115	333.688	549.226	841.415	726.767	585.695	537.328	476.505	262.557	262.557	262.557	262.557	262.557	262.557	262.557	262.557	262.557	262.557	262.557	262.557	14205.9	14104.6	14755.4	14432.9	13510.8	14374.2	14993.3	14977.9	14984.8	15029.6	14955.4	14905
249		15460.8	16181.7	16885.3	15702.6	15003.5	15218.6	18622.9	18023	18596.4	19685.3	18963.3	18792.6	9880.93	7931.23	8349.7	12718.7	17462.6	18616.3	11043.1	7534.21	12741.6	9954.5	7288.26	15081.1	11062.6	11062.6	11062.6	11062.6	11062.6	11062.6	11062.6	11062.6	11062.6	11062.6	11062.6	11062.6	16408.3	16533.6	16751.9	17133.2	19288	19415.8	1852.67	1848.66	1854.06	1856.55	1853.19	1851.27
250		25595.2	23882.9	24633.3	25417.5	22598.4	23035	34938.8	35451.7	33833.8	33493	33640	33696.3	24804	24738.4	26455.8	34010.3	30284.6	32112	33541.2	25478.3	25966.4	24409.7	25099	21642.6	14240.6	14240.6	14240.6	14240.6	14240.6	14240.6	14240.6	14240.6	14240.6	14240.6	14240.6	14240.6	12071.8	12286.6	12549.6	11759.4	11874.5	12551.7	12966.1	12990.3	13056.2	13025.4	12895.4	12939
251		40059.2	37691.9	29163.2	29379.1	30631	27429.1	31808.6	32453.7	33972.9	38616.2	37358.1	33114.9	22387.2	28815.2	27214.4	18971.3	23282.1	36893.6	37315.7	31779.3	20848.3	26487.5	43860.7	27020.4	13619.4	13619.4	13619.4	13619.4	13619.4	13619.4	13619.4	13619.4	13619.4	13619.4	13619.4	13619.4	17316.4	17757.8	16541.6	15344.1	16841.2	17330.2	8213.4	8220.99	8216.4	8224.6	8260.44	8219.09
252		39643.4	40916	42066.1	40464.1	39200	37923.2	17440	18309.1	18193.6	17937.3	17733.8	18166.6	9334.03	8012.43	12063	12023.2	11720.5	11938.2	7963.91	7386.6	10446.8	9230.42	8733.02	13576.9	6094.38	6094.38	6094.38	6094.38	6094.38	6094.38	6094.38	6094.38	6094.38	6094.38	6094.38	6094.38	6685.25	6887.92	6726.22	6218	5910.9	6142.22	3454.15	3451.25	3459.91	3464.38	3458.95	3451.57
253		27495.8	25778	27210.1	30618.5	29664.1	29285.6	11084.9	11201.1	10834.9	10052.1	10354.9	11142.6	6039.53	5572.52	6389.47	7492.46	6300.88	5268.05	5668.01	5306.52	7311.2	8118.5	7335.08	8551.82	4216.47	4216.47	4216.47	4216.47	4216.47	4216.47	4216.47	4216.47	4216.47	4216.47	4216.47	4216.47	13470	13749.8	13902.1	13753.4	14199.2	14123.8	4376.85	4378.72	4376.94	4386.6	4385.01	4380.76
254		62719.1	61988.2	59612.9	60844.7	59859.8	57043	24361.6	24949	24423.5	24114	23801.3	24043.5	27303.8	26279.9	27286	29219.5	27221.7	25909.8	25646.2	25219.2	26673.9	27316.8	26825.2	26771.7	17133.4	17133.4	17133.4	17133.4	17133.4	17133.4	17133.4	17133.4	17133.4	17133.4	17133.4	17133.4	16336.8	16350	16264.5	16238.6	16352.2	16365.9	5803.21	5804.36	5804.38	5803.57	5803.9	5803.89
255		63954.4	58647	57429.2	65175.6	62371.4	57302.1	2216.04	2257.99	2369.34	2335.48	2184.73	2175.32	2095.3	2745.47	2536.18	2258.87	2164.48	2024.6	2370.55	2545.38	1975.82	2020.63	2257.79	2295.54	1322.76	1322.76	1322.76	1322.76	1322.76	1322.76	1322.76	1322.76	1322.76	1322.76	1322.76	1322.76	12071.4	12351.6	12688.3	12309.8	11920.1	12614.4	7043.35	7024.12	7010.36	7034.59	7069.44	7029.75
256		9420.78	9724.4	9174.88	8336.8	8062.73	8921.18	13569.1	11823.7	12698.2	13707.5	13632.9	15373.5	11652.2	7705.58	8939.1	7479.31	10633.2	9360.51	6790.05	12692.1	14533.4	12136.1	9951.61	8991.84	4154.25	4154.25	4154.25	4154.25	4154.25	4154.25	4154.25	4154.25	4154.25	4154.25	4154.25	4154.25	16778.5	18124.1	17967.5	16950.3	18887.9	18709.1	9501.96	9477.36	9458.79	9505.18	9499.4	9472.1
257		13077	12676.4	12322.3	12978.2	14574.2	13832.1	11416.3	12513.7	11808.5	11404.8	12828.9	12583.4	8310.1	7791.16	10477.9	9508.46	11105.3	11143.1	6673.76	5770.73	5834.2	6485.99	10143.1	8827.02	5318.83	5318.83	5318.83	5318.83	5318.83	5318.83	5318.83	5318.83	5318.83	5318.83	5318.83	5318.83	9837.94	9969.61	9311.5	8871.69	9212.33	9319.54	6985.41	6992.8	6993.82	6977.24	6978.4	6994.51
258		30543.4	28741.3	30550.4	34100.4	30612.7	29965.8	25964.4	25219.5	26043	26998.2	26510.7	26991.6	23440.3	21858.5	24013.5	18673.2	17444	20317.1	21044	20223.5	21338.6	31864.5	37206.1	32099	13716.5	13716.5	13716.5	13716.5	13716.5	13716.5	13716.5	13716.5	13716.5	13716.5	13716.5	13716.5	16333.4	16037	16099.7	16824.1	16929.6	16374.2	11863	11882.8	11858.2	11836.7	11851.8	11861.6
259		26852.1	28032.4	29202.8	30083.1	29356.2	27867.3	21371.2	21364	22360.9	20846.6	18996.4	20079.7	20702.5	15790.2	10637.3	8486.65	6786.23	11853.5	11916.4	11399.8	16149.9	23409.9	22396.7	18063.7	11032.8	11032.8	11032.8	11032.8	11032.8	11032.8	11032.8	11032.8	11032.8	11032.8	11032.8	11032.8	10629.4	10769	10571.9	10707.6	10660.1	9664.09	7113.33	7123.17	7171.55	7169.6	7147.34	7172.01
260		66208.2	65399.2	60379.8	54662.4	51950.6	55934.7	51064.8	50224.3	51232	51192.9	49127.4	51791	34021.2	40561.7	34489.4	29547.1	54079.3	57580.9	51369.2	41079.4	40041.2	40460.8	40886	49882.3	27995	27995	27995	27995	27995	27995	27995	27995	27995	27995	27995	27995	8912.93	9263.05	9440.82	8976.23	9497.26	9524.77	7790.21	7810.17	7783.84	7765.43	7789.81	7803.43
261		65465.5	59182.6	61344.6	77573.7	76807.4	63699.4	3099.91	3284.44	3554.96	3323.01	2883.96	3091.65	2452.14	1924.37	1812.63	2002.26	1867.44	1903.04	3268.74	4187.48	3493.12	2613.59	2407.49	2529.79	1730.46	1730.46	1730.46	1730.46	1730.46	1730.46	1730.46	1730.46	1730.46	1730.46	1730.46	1730.46	19886.4	20134	20035.6	21605.4	22212.6	19590.4	10781.1	10800.9	10880.8	10925.4	10940.8	10896.7
262		46885.2	49025.4	50600.1	46698.1	43781.2	43632.7	33284.4	34748	33968.6	33926.8	35157.5	34550.1	32956.7	30754.9	32117.3	33232.5	31820.6	33006.5	35460.1	36363.4	34537.8	36380.4	36014.8	33342.3	18027.8	18027.8	18027.8	18027.8	18027.8	18027.8	18027.8	18027.8	18027.8	18027.8	18027.8	18027.8	23113.3	22536.3	21925.2	22753.4	22374.9	22107.4	12474.6	12425	12448	12484.1	12507.6	12534
263		49946.2	45326.5	45131.5	48078.9	45859.3	49750.9	45780.7	50122.3	48937.1	43172.1	45941.3	48484.1	58754.2	48113.9	36719	26256.7	34660.6	45307.8	26856.3	25608.6	31931.9	29766.3	28117.6	30994.1	15617.5	15617.5	15617.5	15617.5	15617.5	15617.5	15617.5	15617.5	15617.5	15617.5	15617.5	15617.5	17123.1	17099.3	16414.1	16864.4	16861.8	16794.4	10343.2	10297.2	10278.3	10282.1	10304	10298.2
264		8540.09	8237.79	8352.91	9283.04	10804.2	10157.4	22023.7	21349.8	20982.5	23034.9	23444.7	22543.1	14347.2	16387.8	22401.8	17105.1	16421.2	15365.6	12759.1	14912.1	11883.3	11836.6	19623.9	19342.6	13293.7	13293.7	13293.7	13293.7	13293.7	13293.7	13293.7	13293.7	13293.7	13293.7	13293.7	13293.7	19234.6	18927	19414.9	19269.8	19053.7	20308.2	9126.91	9096.96	9101.44	9109.14	9095.26	9068.18
265		64408.3	62687.3	57730.8	62097	65858.5	64405.8	5611.04	5397.71	5471.07	5337.86	5577.02	5788.32	4557.45	4824.64	4248.65	3771.18	5148.2	5078.09	4517.83	4462.16	4253.95	4798.71	5618.65	4949.03	2329.39	2329.39	2329.39	2329.39	2329.39	2329.39	2329.39	2329.39	2329.39	2329.39	2329.39	2329.39	8695.09	9109.57	9792.78	9470.74	9155.89	8975.77	8755.89	8762.91	8747.38	8726.76	8728.56	8749.26
266		21664.3	22239.8	22894.8	21821.8	20495.5	20697.6	29536.6	30029	29075.3	28719.1	29515.1	29336.7	23513.6	23129.9	24261.5	26254.8	24798.1	28598.5	36935.8	29303.7	24125.5	20811.9	20957.8	22949.4	15388.5	15388.5	15388.5	15388.5	15388.5	15388.5	15388.5	15388.5	15388.5	15388.5	15388.5	15388.5	13972.3	13676.3	14486	15023.6	14258.6	14155.2	8369.08	8410.56	8435.63	8399.2	8419.13	8419.14
267		54671	55742.5	53181.4	50133.5	60384.3	70428.9	16888.9	15763.1	15217.1	14231.5	14745.5	16220	11245.3	8621.44	12119.9	14670.3	13750.6	11067.1	12169.9	15635.7	8747.92	9806.19	14819.5	13152.9	11818.8	11818.8	11818.8	11818.8	11818.8	11818.8	11818.8	11818.8	11818.8	11818.8	11818.8	11818.8	17340.3	17193.4	18393.4	18698.8	17085.2	16934.3	2971.45	2972.19	2983.51	2975.8	2965.61	2976.22
268		24866	25690.1	26110.3	25932.2	26580.5	25602.5	53068.2	53248.9	54365.6	54821.2	53637	53470.4	59026.4	58746.3	59923.7	58735.7	60131.3	59634.8	58011.7	63124.8	61778.3	57578.5	59627.6	60670.4	34481	34481	34481	34481	34481	34481	34481	34481	34481	34481	34481	34481	13800	13772.5	13743.2	13807.7	13818.4	13767.2	6566.63	6566.72	6569.39	6568.76	6568.89	6567.43
269		11698.1	11796.9	11209.2	11037.5	11636.9	11367.8	15436.3	15911.8	16389.8	15904.9	16433.9	16831.8	7898.74	6553.04	6896.29	7594.11	8482.38	9797.51	10468.7	10109.7	7999.92	7105.16	5802.11	6176.3	5330.84	5330.84	5330.84	5330.84	5330.84	5330.84	5330.84	5330.84	5330.84	5330.84	5330.84	5330.84	15585.6	16831.9	16547.1	15278.1	15945.4	15772.7	12271.3	12256.5	12385.8	12424.7	12355.9	12363.6
270		29294.8	31222.9	31650.1	32217	29208	25404.7	21856.2	22039.1	22019.3	22731.7	22042.2	22755.8	16164.8	15850.4	24961.3	15096.1	13602.9	14933.1	16263.4	15806.9	9341.26	7923.58	13964.2	16823.5	6086.74	6086.74	6086.74	6086.74	6086.74	6086.74	6086.74	6086.74	6086.74	6086.74	6086.74	6086.74	12607.3	12747.2	12767.2	12653.4	12520	12444.3	10057	10037.8	10067.7	10080.4	10055	10072.6
271		10106.7	10556.6	11198.8	10420.7	9965.45	10691.2	49696.8	47957.7	51458	53062	54918.6	51613.6	22808.2	29454.1	40740.7	35253.7	19374.3	18004.1	22985.9	35767.8	50515.8	29097.3	25387.2	34093.6	19132.6	19132.6	19132.6	19132.6	19132.6	19132.6	19132.6	19132.6	19132.6	19132.6	19132.6	19132.6	7211.89	7224.17	7276	7288.88	7188.87	7158.22	14077.3	14067.2	14078.7	14090.5	14080.2	14090
272		28268.2	27957.6	27473.4	28351.4	31716.5	27661.3	1653.35	1910.09	2076.69	1911.44	1805.14	1833.19	1042.11	1057.57	1100.76	1252.21	1060.11	1214.42	1119.36	1158.14	1715.85	1138.94	851.44	1325.94	1089.34	1089.34	1089.34	1089.34	1089.34	1089.34	1089.34	1089.34	1089.34	1089.34	1089.34	1089.34	7831.56	7899.13	8166.54	7760.54	8078.87	8932.47	4521.14	4500.85	4507.86	4519.08	4504.36	4514.68
273		38593	40517.4	38110	35551.1	35339.5	34622.1	16840.2	17545.3	15603.2	14374.1	16297.1	16212.8	13183.1	19947.7	18417.4	15491.2	16841.5	21264.9	18683.2	20557.8	18662.5	11255.6	11436.5	15987.3	9460.42	9460.42	9460.42	9460.42	9460.42	9460.42	9460.42	9460.42	9460.42	9460.42	9460.42	9460.42	16856.9	16507.1	16106.8	16307.9	16632.9	16740.2	6689.96	6693.05	6687.61	6685.84	6689.55	6687.82
274		44797	45587.8	47663	47996.4	47585.3	46599.2	4774.2	4692.13	4636.61	4696.12	4895.32	5031.83	5153.33	5128.82	5568.02	5875.86	5841.89	5478	5322.45	4873.28	5056.68	5243.83	4748.11	4573.18	2693.93	2693.93	2693.93	2693.93	2693.93	2693.93	2693.93	2693.93	2693.93	2693.93	2693.93	2693.93	11381.2	11403.6	11358.1	11126.1	11127.3	11329.1	9693.04	9690.68	9696.64	9700.74	9709.26	9716.23
275		59429.3	59883.5	58241.7	52700	57171.7	64830.7	7778.86	7458.43	7562.03	7877.02	8329.67	7825.3	6289.72	8010.43	6460.03	6556.54	7073.17	7076.34	8658.45	9400.61	7590.36	6374.95	5490.46	5531.14	3884.21	3884.21	3884.21	3884.21	3884.21	3884.21	3884.21	3884.21	3884.21	3884.21	3884.21	3884.21	8048.91	8179.3	8909.53	8924.77	8831.22	9185.84	9809.73	9793.47	9818.33	9782.1	9766.23	9803.07
276		58878.9	56112.8	55294	55601.4	52355.3	60517.8	54780.9	50799.4	41716.3	40023.9	44773.7	45224.6	42168.4	45971.2	50017.3	50427.2	33774.6	35284.4	25567.4	33754	66949.2	48178.9	30766	31755.6	22486.4	22486.4	22486.4	22486.4	22486.4	22486.4	22486.4	22486.4	22486.4	22486.4	22486.4	22486.4	9129.59	8602.24	7629.16	8092.01	8292.95	8366.21	11804.1	11742.9	11729.5	11766.1	11749.8	11755.5
277		23404.8	23069.5	20676.6	19322.4	19695.2	21336.7	18900.3	18212.4	18500.1	19187.5	19374.1	18909.4	10077.5	11558.4	11374.8	11258.7	14736.6	12694.7	9414.68	11037.6	9943.94	8475.46	10245.4	11802	5958.59	5958.59	5958.59	5958.59	5958.59	5958.59	5958.59	5958.59	5958.59	5958.59	5958.59	5958.59	12241.3	12892.1	14243	13420.8	12299.4	12775.4	6299.89	6297.07	6322.06	6333.75	6328.41	6318.66
278		26556.1	27254.5	28672.7	28352.3	27013.2	27091	1308.64	1317.9	1272.97	1225.73	1315.3	1431.2	1361.07	1092.35	1385.45	1512.32	781.746	674.772	965.099	1003.9	1194.97	1158.96	922.653	812.445	633.506	633.506	633.506	633.506	633.506	633.506	633.506	633.506	633.506	633.506	633.506	633.506	12568.9	13166.8	13577.2	12829.3	13105.6	13118.1	8977.54	9030.04	9049.58	8993.55	8974.04	8982.71
279		46765.6	49073.9	48732.6	46538.5	48605.9	48965.2	29430.9	30480	30977.2	30105.8	29982	28305.2	12601.9	15510	18273.3	21920.9	18333.7	13529.3	12272.2	18162.2	21343.6	14024.2	15258.1	17203.1	8371.43	8371.43	8371.43	8371.43	8371.43	8371.43	8371.43	8371.43	8371.43	8371.43	8371.43	8371.43	14318.9	14318.9	14318.9	14318.9	14318.9	14318.9	10634.6	10634.6	10634.6	10634.6	10634.6	10634.6
280		31174.8	31363.7	29790.3	30816.2	30154	27111.1	7927.64	7991.17	7490.49	7709.38	8482.06	7896.33	5362.66	6347.44	5984.46	6248.77	6475.61	5375.64	7570.93	7701.23	6505.16	7331.94	6767.63	6571.85	3468.92	3468.92	3468.92	3468.92	3468.92	3468.92	3468.92	3468.92	3468.92	3468.92	3468.92	3468.92	10616.2	10353.5	10197.2	11333.6	13132.1	11370.1	14624.7	14662.3	14643.1	14661.7	14665.9	14776.4
281		47280.8	49327.3	54154.9	56840.1	55833.2	50287.6	5992.2	6529.76	6617.42	6390.52	6117.55	6023.7	5978.42	5140.53	4131.92	4661.02	4176.53	3318.44	3467.94	3588.57	4134.04	5240.8	6102.97	5680.63	2073.43	2073.43	2073.43	2073.43	2073.43	2073.43	2073.43	2073.43	2073.43	2073.43	2073.43	2073.43	10194.1	10270.8	10499.7	10730.7	10958.8	10588.4	13735	13736.8	13730.7	13734.5	13727.2	13732.8
282		42458.6	43471.3	46193.8	46584.5	51061.5	55538	72923	65306.8	74795.4	77360.5	73974.9	74591.8	76802.7	113948	67055.1	58880.4	62153.7	48961.5	63046.5	81880.2	53965	40509.9	50429.5	48554.4	28898.4	28898.4	28898.4	28898.4	28898.4	28898.4	28898.4	28898.4	28898.4	28898.4	28898.4	28898.4	16397.7	15778.6	16093.7	16003.4	15425.1	15502.4	10953.2	11032.1	11012.7	10928.6	10964.1	11022.3
283		30228.8	28936.1	26202.9	27003.5	26019.8	23164.9	440.581	477.603	476.612	438.911	424.134	467.618	246.222	210.039	259.761	310.331	456.375	423.774	382.565	380.798	350.507	315.105	287.34	261.045	128.358	128.358	128.358	128.358	128.358	128.358	128.358	128.358	128.358	128.358	128.358	128.358	9683.84	10435.8	10840.5	10047	9648.95	10030.2	12633.8	12619.2	12511.8	12542.6	12596.4	12550.3
284		62332.8	62651.4	63577.1	64244.9	62708.4	60634.8	37780.2	39027.6	38836.4	38057.3	38530.7	39105.1	43785.1	42434.2	42688	43738.5	42954.5	39813.7	39227.2	39445.2	38925	39821.5	39299.5	39723.5	24360.5	24360.5	24360.5	24360.5	24360.5	24360.5	24360.5	24360.5	24360.5	24360.5	24360.5	24360.5	19087.2	19074.2	19579.6	19652.7	18801.5	18774	5715.82	5715.98	5723.16	5718.36	5702.25	5715.62
285		47743.7	49087	54188.8	60913.3	53732.4	50579.7	35737.7	33127.2	33603.4	34673.2	36550.6	35953	26588.4	20461.1	29489.4	25321	18961.6	30435.7	34546.1	27742.5	23350.1	14108.8	31059.9	67473.8	17799.7	17799.7	17799.7	17799.7	17799.7	17799.7	17799.7	17799.7	17799.7	17799.7	17799.7	17799.7	11845	11901.8	11918.2	11842.4	11986.8	12163.9	9938.42	9936.8	9947.39	9942.83	9933.68	9929.31
286		18299.4	18099.7	18740	19057	18120.1	17016.3	24074.2	24827.1	23983.9	24699.8	24334.9	23368	10556.6	12511.4	15267.7	11124.8	13443.4	16785.5	17038.5	15906.6	15254.6	21652.2	23648.6	20196	10008.7	10008.7	10008.7	10008.7	10008.7	10008.7	10008.7	10008.7	10008.7	10008.7	10008.7	10008.7	17996.6	17792.3	17308.7	17607.4	18220.1	18026.8	16135.9	16121.5	16160.4	16164.7	16147.8	16149.2
287		55567.3	55707.1	56220	59828	61174.2	54516.3	1197.1	1191.25	1272.56	1366.87	1313.7	1249.26	1076.64	1127.82	868.84	896.703	1185.68	1975.03	1898.77	1098.7	1081.45	1414.85	1214.99	1173.14	674.479	674.479	674.479	674.479	674.479	674.479	674.479	674.479	674.479	674.479	674.479	674.479	17442.1	17584.7	18786.5	19401.2	18749.9	18719.3	12444.2	12386.5	12374.5	12392.7	12465.6	12512.9
288		20041.5	21769.9	22828.3	21426.9	20939	20038.8	35624	35881.8	36971.8	37511	38478.7	36124.5	19379.3	32734.2	25309	20785.2	17031.3	16888.2	18995.8	21311.6	23526.1	21510.1	29520.1	26759	15141.7	15141.7	15141.7	15141.7	15141.7	15141.7	15141.7	15141.7	15141.7	15141.7	15141.7	15141.7	9732.02	10580	10517.1	9643.56	9508.19	9624.12	8328.78	8311.55	8345.58	8306.58	8266.85	8299.32
289		45689.2	45193	45831.1	46516.8	46232.9	45575.6	8453.24	8501.12	8618.6	8802.11	8753.79	8679.38	9582.51	9202.19	9420.42	9677.62	9572.01	10539.1	10376.8	9229.74	8987.69	9038.58	9494.89	9563.01	5583.46	5583.46	5583.46	5583.46	5583.46	5583.46	5583.46	5583.46	5583.46	5583.46	5583.46	5583.46	17392.3	17729.1	17860.6	17739.1	17821.6	17584	13329.3	13326.6	13335.6	13326.6	13346.7	13369.2
290		44656.6	46196.1	46488.5	43791.4	49944.4	49183.6	24755.9	26453.1	25558.4	24855.2	26437.4	26638.9	25848.1	22681.4	22834.5	28962.5	27249.8	23885.6	22437.8	25226.6	26774.1	24844.7	26650	21994.8	15001.7	15001.7	15001.7	15001.7	15001.7	15001.7	15001.7	15001.7	15001.7	15001.7	15001.7	15001.7	17811.8	17425.3	17849.5	18770.6	18902.2	17519.9	12440.3	12516.1	12614.3	12579.3	12512.1	12529.9
291		60148.3	62199	60673.3	58466.3	58105.9	57654.3	23959.3	23679	23900.3	23766.1	23129	23053.8	22606.9	26090.5	26449.6	24754.7	29194.6	24668.5	23453.8	24563.2	23626.8	23408.6	23310.2	22882.6	14678.4	14678.4	14678.4	14678.4	14678.4	14678.4	14678.4	14678.4	14678.4	14678.4	14678.4	14678.4	10485.5	10942.1	11114.3	10466.1	10548.6	10911.7	5242.08	5263	5251.9	5230.1	5225.15	5233.94
292		38698.4	40167.3	41501.3	37906.9	41138	42350.8	16009.4	16451.2	15722.7	16098.1	17029.8	16975.6	11729.9	11025.6	12468.2	13800.3	15473.5	18377.2	18382.2	14362.5	16627.4	20662.2	15225.3	13497.9	7509.17	7509.17	7509.17	7509.17	7509.17	7509.17	7509.17	7509.17	7509.17	7509.17	7509.17	7509.17	18350	18420.4	18352.8	18074.1	18667.4	19056.4	9913.84	9898.52	9907.1	9925.55	9925.42	9968.31
293		26943	24688.1	24461.2	27625.4	28170.7	27929.5	13477.5	12996.9	13462.4	13178.4	12709.1	13933.3	6377.85	4878.09	7090.44	7185.36	6436.61	7181.74	7079.3	6337.49	6885.92	7054.78	8161.26	10983.4	5238.46	5238.46	5238.46	5238.46	5238.46	5238.46	5238.46	5238.46	5238.46	5238.46	5238.46	5238.46	15915.3	15728.8	15700.6	15956.8	16078.5	16151	10894.4	10880.9	10882.8	10895.4	10861.2	10867.7
294		42823.2	47209	46378.1	44224.9	46210.8	40288.9	16426.6	16940.5	17094.6	17489.7	16506.6	16280.6	12029.2	11732.3	15276.4	16389.5	10497.1	11780.1	10949	9128.16	14022.6	14177.3	19707.8	26172.4	12710.9	12710.9	12710.9	12710.9	12710.9	12710.9	12710.9	12710.9	12710.9	12710.9	12710.9	12710.9	11396.1	11795.8	12348.8	12029.9	12020.7	11893.6	7291.74	7298	7307.18	7303.76	7303.24	7311.36
295		26541.3	26725.7	29236	31909.4	30776.7	28482	23443.8	24014.3	24425	25982.9	28019.9	25967.8	10155.3	10221.1	11505.9	11612.2	19516	16020.9	15370	13614.2	11665.4	11661.4	10659.6	11834	9719.37	9719.37	9719.37	9719.37	9719.37	9719.37	9719.37	9719.37	9719.37	9719.37	9719.37	9719.37	13104.3	12633.7	13077.3	13364.9	12786	13117.2	5911.43	5924.88	5922.9	5916.28	5906.32	5893.04
296		38790.7	38752.7	39965.1	40651.7	38659.9	37718.8	8347.49	8497.19	8386.69	8390.37	8555.67	8306.26	8490.35	9187.64	8685.8	8578.6	8603.33	9154.07	9097.9	8195.85	8639.17	9282.99	8978.47	9686.41	5758.39	5758.39	5758.39	5758.39	5758.39	5758.39	5758.39	5758.39	5758.39	5758.39	5758.39	5758.39	18424	18456.9	18720.3	18751.5	18613.8	18703	11021.6	11008	11014.3	11022.7	11036.1	11033.8
297		62736.4	58374.7	58586.1	61854.7	60589	63039.5	4729.12	4854.59	4452.92	4493.54	4282.76	3950.7	1881.25	2945.98	3271.86	2551.84	3557.11	2485.13	2792.36	3295.87	3138.07	3668.94	4689.95	5482.24	1538.26	1538.26	1538.26	1538.26	1538.26	1538.26	1538.26	1538.26	1538.26	1538.26	1538.26	1538.26	18672.4	19974.6	20970.3	19821.3	20005.7	21075.5	9806.19	9806.24	9837.67	9762.96	9822.95	9854.93
298		4584.15	4733.09	5007.61	4629.31	4618.17	4850.71	4486.48	4699.68	4811.85	4495.52	4314.94	4515.08	3289.67	2644.63	2653.13	3161.94	2342.64	1861.24	1884.15	2049.26	2654.14	3895.62	3206.87	2232.33	1768.55	1768.55	1768.55	1768.55	1768.55	1768.55	1768.55	1768.55	1768.55	1768.55	1768.55	1768.55	16458.1	15411.4	15712.6	16129.3	15690.3	16307.6	4939.39	4945.34	4950.56	4945.5	4943.1	4952.04
299		44912.3	43429.5	44613.7	44404.9	44528.5	43752.5	31304.4	34716.2	29564.4	27684	28739.8	29842.1	14211.7	13471.6	19369.7	20497.2	30061.7	29387.8	17318.1	16832	32005.6	29588.4	19200	18232.3	10641.9	10641.9	10641.9	10641.9	10641.9	10641.9	10641.9	10641.9	10641.9	10641.9	10641.9	10641.9	8922.8	9288.79	10523.6	10270.8	9723.54	9512.74	12346	12398.4	12351.5	12332.1	12293.5	12280.1
300		41812.9	43915.4	43692.7	40464.4	40163.1	42665.4	1244.61	1228	1215.88	1164.5	1164.5	1174.16	536.705	599.75	487.036	452.27	602.314	526.706	506.148	449.958	468.263	629.324	1033.59	1444.99	474.725	474.725	474.725	474.725	474.725	474.725	474.725	474.725	474.725	474.725	474.725	474.725	8503.57	8519.97	8598.91	8763.64	8444.42	8241.99	7782.63	7779.91	7781.99	7776.62	7777.81	7781.22
301		35222.1	35642	35612.6	39141.9	42566.2	36051.9	1094.92	1163.17	1169.06	1241.3	1211.57	1190.66	1176.81	670.622	531.534	726.375	786.366	547.13	663.393	1130.78	1035.72	816.629	512.084	749.082	661.084	661.084	661.084	661.084	661.084	661.084	661.084	661.084	661.084	661.084	661.084	661.084	11204.4	10801.2	11342.7	12754.4	13558.2	12996.3	2938.57	2933.59	2912.26	2916.43	2919.32	2920.02
302		35395.6	36241.8	38880.5	36906.3	34558.7	36321.1	23836.8	22073	22077.7	23587.7	23018.4	23409.2	12888.9	14437.7	17621.8	15189	10371.6	7402.59	9193.4	13715.1	13722.1	13414.8	9374.69	12074.5	10795.9	10795.9	10795.9	10795.9	10795.9	10795.9	10795.9	10795.9	10795.9	10795.9	10795.9	10795.9	16692.9	17131	15994.8	14987.2	15760	16907.7	9145.93	9115.82	9127.36	9157.17	9172.76	9100.14
303		55163.8	52884.1	53393.8	55999.9	58776.3	58840.6	56514.4	57979.9	55792.6	54330.8	53772.8	58878.5	53061.5	37465.4	38445.5	28642.7	27967.9	26698.2	26780.6	29873.7	34584.1	55006.4	33433.1	31047.3	26776	26776	26776	26776	26776	26776	26776	26776	26776	26776	26776	26776	16740.6	16993.8	16657	15832.6	15901.5	15995.2	3494.05	3502.8	3495.84	3496.66	3499.36	3495.75
304		48102	47410	46261.8	49355	53645.7	50554.5	42588.6	45512	43392.6	38751.2	34715.1	38240.8	32409.7	17141.8	13343.7	14766.1	19635.5	29240.1	34612.4	40037.7	42431.8	28371.1	29572.6	41099.2	25244.5	25244.5	25244.5	25244.5	25244.5	25244.5	25244.5	25244.5	25244.5	25244.5	25244.5	25244.5	14403.5	15209.4	15076.2	14305.1	15001.2	15213.5	6843.42	6814.06	6871.42	6883.71	6860.67	6861.99
305		31849	31706.5	37442.7	43028.9	36219	29818.9	14819.7	16736.8	15707.5	14713	15888.9	15000.3	9974.57	10460.8	7762.26	11195	16767.3	14355.6	10967.2	11330.8	16522	13555.4	10601.7	10474.4	8256.29	8256.29	8256.29	8256.29	8256.29	8256.29	8256.29	8256.29	8256.29	8256.29	8256.29	8256.29	12612.6	11700.4	10630.5	10248.9	10385.7	12415.7	12168.7	12121.4	12086	12063.2	12078.5	12075.2
306		33459.4	30827.9	27385.9	29964.8	32901.3	32759	6342.6	6333.92	6391.11	6081.45	6297.85	6905.97	6030.41	5508.02	4808.39	5001.97	6523.22	4551.14	4349.86	4110.07	4565.14	6718.82	4801.83	4937.29	3806.47	3806.47	3806.47	3806.47	3806.47	3806.47	3806.47	3806.47	3806.47	3806.47	3806.47	3806.47	9371.38	10283.4	11307.4	10184.6	10043.9	10159.8	11502.2	11525.8	11503.6	11478.5	11498.2	11557.4
307		33023.1	35271.4	36646.8	35351.4	35935	35005.1	696.281	712.877	689.83	679.667	678.252	714.672	778.379	690.021	629.737	635.006	587.746	510.144	565.341	667.488	621.083	493.536	564.35	449.705	268.879	268.879	268.879	268.879	268.879	268.879	268.879	268.879	268.879	268.879	268.879	268.879	9222.07	9353.59	10812.2	10463.6	9430.95	9607.39	7285.81	7305.7	7282.86	7257.48	7298.88	7311.6
308		28724.7	29201.7	31019.8	32692.4	33364.3	33777.7	53339	49019.7	49642.9	51513	51173	49088.4	48700.7	55464.8	63820.4	61280.7	42767.1	46752.8	47907.3	51705.1	61274.6	46083.5	49010.3	64326.2	29482.8	29482.8	29482.8	29482.8	29482.8	29482.8	29482.8	29482.8	29482.8	29482.8	29482.8	29482.8	8444.69	8518.93	7872.54	7543.54	7341.6	7415.97	9871.39	9911.27	9889.7	9839.7	9812.87	9826.3
309		39766.7	41549.8	45489.1	38238.6	40813.4	49476.3	11869.5	11562.9	11320.1	11883.1	11670	11704.3	7164.79	7294.94	7776.99	9384.06	10648.1	6396.71	5984.95	7827.12	7725.34	6239.24	5895.71	13699.2	8841.09	8841.09	8841.09	8841.09	8841.09	8841.09	8841.09	8841.09	8841.09	8841.09	8841.09	8841.09	17808.6	17453.2	17466	17453.1	17426.6	17776	12481.5	12465.2	12456.1	12494.7	12532.1	12537.7
310		23680	22915.7	23897	24384.7	22913.1	24016	3699.71	3655.29	3707.53	3676.09	3692.5	3641.07	3243.49	3396.84	3397.17	3599.49	3712.2	3592.26	4304.43	4831.03	4477.76	3526.47	3325	3615.76	2150.01	2150.01	2150.01	2150.01	2150.01	2150.01	2150.01	2150.01	2150.01	2150.01	2150.01	2150.01	14436	14565.1	14498.5	14742.4	14632.5	14153.1	6992	6992.29	7013.33	6987.61	6980.22	7003.54
311		32413.4	31926.5	34371	37561.7	36781	34873.3	10522.7	10236.8	10227	10543.4	10279.8	10258.8	4421.14	5255.69	6182.81	5415.93	5054.58	6080.6	8550	6289.62	5519.43	5613.02	5008.71	5973.43	4722.43	4722.43	4722.43	4722.43	4722.43	4722.43	4722.43	4722.43	4722.43	4722.43	4722.43	4722.43	13150	13584.8	13497.1	12626.9	12765.9	13166.1	6974.3	6984.02	6990.65	6976.03	6976.78	6995.36
312		41622	40654.3	41754.8	44207.4	39699.9	41250.3	23243.5	21110.7	21319.4	20977.3	21558.3	21591.1	15500.3	15857.6	17600.6	20416.4	19031.8	20413	18726.1	18736.8	23296.1	24441.7	31172.4	22466.5	9015.12	9015.12	9015.12	9015.12	9015.12	9015.12	9015.12	9015.12	9015.12	9015.12	9015.12	9015.12	14925.6	14905.2	15124.2	15420.7	14750.7	14200	6392.53	6399.92	6401.29	6403.92	6408.17	6409.58
313		20311.8	20411	20715.9	21647.1	21444.1	19523.5	16877.1	17247.9	17539.3	18290.2	17625.6	16970.1	7377.85	7251.23	8577.9	8956.89	8114.16	8233.75	8412.9	9993.89	10350.8	8261.92	7876.01	8773.13	5505.16	5505.16	5505.16	5505.16	5505.16	5505.16	5505.16	5505.16	5505.16	5505.16	5505.16	5505.16	7811.2	7792.02	7671.88	7612.87	7588.1	7573.01	10662.2	10662.3	10666.3	10668.8	10660.7	10666.1
314		34471.4	36391.1	37888.8	37053.8	33384.5	30094.8	473.33	486.719	530.071	510.498	470.798	499.372	543.795	392.704	258.726	337.875	531.144	609.834	457.482	375.77	308.999	268.47	278.392	299.839	215.563	215.563	215.563	215.563	215.563	215.563	215.563	215.563	215.563	215.563	215.563	215.563	14186.9	13503.4	15206	17020.2	16107.3	16528.7	13910.4	13783.7	13671.9	13758.1	13824.2	13799.1
315		29246.6	31288	31380.1	32001.4	35171.1	30054	3043.11	3167.08	3047.78	2987.2	3067.32	2901.33	1757.53	4004.75	2957.3	2108.2	2207.86	1956.16	2521.88	2667.5	2164.52	2566.39	2067.48	2045.87	1629.53	1629.53	1629.53	1629.53	1629.53	1629.53	1629.53	1629.53	1629.53	1629.53	1629.53	1629.53	15440.6	14970	14473.3	14649.1	14669.9	14755.7	5814.92	5810.49	5822.42	5834.87	5841.5	5841.24
316		40834.9	41649.9	44912.9	45049.6	46390.1	49300.7	15522.6	14806.6	14304.9	14906.5	15228.5	14498.8	13051.4	14813.6	13073.1	11084.9	12211.2	14096.5	12657.2	11991.3	14538.7	14254.7	11488	11548.8	8976.13	8976.13	8976.13	8976.13	8976.13	8976.13	8976.13	8976.13	8976.13	8976.13	8976.13	8976.13	14637.4	14662.8	13785.7	13531.2	13810.1	13478.5	3854.67	3863.17	3852.7	3856.04	3900.34	3910.26
317		32475.4	32769.7	33405.5	33684.7	35604.2	34500.6	17695.7	17930.9	18708.8	19303.7	19450.1	19304.9	10876.1	9503.93	8318.83	8642.65	9617.64	8541.17	8312.77	9637.33	8872.55	11871.6	15023.4	11361.1	6119.16	6119.16	6119.16	6119.16	6119.16	6119.16	6119.16	6119.16	6119.16	6119.16	6119.16	6119.16	15738.6	16930.8	18084	15711.4	15475	16514.4	6852.25	6857.11	6826.2	6852.26	6927.23	6926.26
318		52029.9	50273	43684.2	41305	43299.8	46553.8	11563.4	11123.9	11189.9	12206.7	11293.1	11079.6	4936.86	4046.12	7046.69	8520.62	10002.3	10594	8015.08	6081.36	6764.93	9403.45	8443.59	5410.16	2793.92	2793.92	2793.92	2793.92	2793.92	2793.92	2793.92	2793.92	2793.92	2793.92	2793.92	2793.92	16578.2	15659.5	15255.3	15493.1	14628.9	15576.9	11133.7	11144.1	11110.9	11055.4	11049.7	11077.5
319		54092.3	53397.9	51710	51972.4	52801.1	52186.1	744.61	746.552	743.663	741.272	743.013	750.195	843.891	848.235	848.059	834.605	830.865	863.46	885.7	876.433	853.338	842.124	840.921	852.176	515.048	515.048	515.048	515.048	515.048	515.048	515.048	515.048	515.048	515.048	515.048	515.048	16660.4	16708.6	16876.6	15956	15704.6	16800.6	10386	10377.3	10318.2	10284.8	10321.8	10338.4
320		46178.3	42239.2	43739	48495.8	49409.1	51743.5	30730.6	29897.6	31046.4	28443.8	26569.7	31639.7	28352.5	19383	19442.1	25220.8	25119.5	26012.7	30130.2	17744.9	18183.1	25378.9	21537.4	16193.8	10492.2	10492.2	10492.2	10492.2	10492.2	10492.2	10492.2	10492.2	10492.2	10492.2	10492.2	10492.2	8221.63	8001.27	8133.83	8557.79	8542.49	8648.94	11756.2	11750.6	11745.9	11705.5	11772.2	11801.5
321		36152.9	35032.9	35178.8	35534.2	34661	36574.6	12949.4	12340.8	12372.1	12347.7	12031	12286	12332.2	14676.1	12174.2	12267.2	11904.3	10101.9	9429.66	9826.18	9920.42	10576.3	11909.7	12335.4	6285.82	6285.82	6285.82	6285.82	6285.82	6285.82	6285.82	6285.82	6285.82	6285.82	6285.82	6285.82	8971.15	8922.39	8907.27	9000.79	8979.35	9003.09	11391.1	11383	11386	11390.4	11388.9	11380.8
322		27765.5	27823.8	27668.4	27818	28105.6	27727	23309.7	23347.2	23436.3	23321.5	23450.1	23591.1	27523.5	27376.7	27492.9	28108.6	28189.7	27744	27560.1	28078.2	27833.1	27232	27430.1	27732.5	16319.4	16319.4	16319.4	16319.4	16319.4	16319.4	16319.4	16319.4	16319.4	16319.4	16319.4	16319.4	11082.2	11438.5	12834.5	12342.7	11337	11494.1	8855.52	8889.68	8889.39	8902.89	8908.69	8869.67
323		47741.8	48175.1	49739.8	47315.5	51045.6	54553.9	5801.58	5766	5250.57	5327	4979.75	5372.26	5326.89	4618.55	4826.82	3833.78	4038.09	4486.21	3462.63	2896.03	4232.13	5381.17	4455.16	3408.68	2241.51	2241.51	2241.51	2241.51	2241.51	2241.51	2241.51	2241.51	2241.51	2241.51	2241.51	2241.51	11555	12331.6	13156.1	12564.3	12228.1	11873.9	8426.17	8433.29	8439.24	8442.54	8445.28	8454.33
324		46446.2	46826.1	46580.3	46080.6	46269.7	46042.5	54151	54598.1	54491.7	54231.9	54149.4	54249.9	64442.9	65106.8	64276.7	63981.2	62853.2	62195.7	62456.7	63065.2	63630.9	64107.6	64557.8	62738.3	37366.4	37366.4	37366.4	37366.4	37366.4	37366.4	37366.4	37366.4	37366.4	37366.4	37366.4	37366.4	15755.7	16968.1	17201.4	16166.7	16424.1	15323.9	5368.12	5400.82	5403.7	5380.3	5370.41	5387.07
325		56434.7	54233.9	55774.3	57964.8	53973.9	51099.6	2514.49	2619.44	2663.55	2730.2	2780.36	2687	3282.55	4012.73	2713.32	2300.51	2355.96	2452.62	2247.07	2415.92	3442.56	3027.15	2753.61	3054.29	2007.68	2007.68	2007.68	2007.68	2007.68	2007.68	2007.68	2007.68	2007.68	2007.68	2007.68	2007.68	16608.9	16535.9	15153.5	14764.1	14425.4	14429	14306	14286.5	14287.5	14273.3	14239.1	14255.2
326		54804.7	51381.1	45761.8	46754.2	49427	52808.3	11799.2	11528.7	10568.6	9926.06	10281.9	10303.7	7676.03	9408.6	10555	11335.9	11888.1	11590.5	13576.6	12405.4	13068.8	11608.3	8289.39	8277.66	5441.7	5441.7	5441.7	5441.7	5441.7	5441.7	5441.7	5441.7	5441.7	5441.7	5441.7	5441.7	16014.3	15264	15563.8	16549.9	16702.9	17524.3	5195.13	5192.23	5178.73	5189.07	5195.45	5172.59
327		49232.2	45350.8	46792.3	49607.9	53527	62041	35362.6	33831.2	34535.6	34601.8	33134.2	33850	25333.4	19320.1	13219.1	12473.7	23437	19247.9	17904	25368.2	32838.6	31559.6	24914.9	16773.6	10578	10578	10578	10578	10578	10578	10578	10578	10578	10578	10578	10578	19135.8	20044.1	20617.2	18969.5	20156	20508.6	5311.63	5334.52	5312.99	5294.55	5317.59	5350.55
328		52730.1	52819.4	53827	54581.2	54490.2	54313.2	58326.2	58442.4	59259.4	58492.6	58029.3	57796.2	63811.8	65991.6	65356.6	63590.6	63467.2	63264	67524.3	70160.6	65536.4	64041.1	64666.3	66972.8	38173.6	38173.6	38173.6	38173.6	38173.6	38173.6	38173.6	38173.6	38173.6	38173.6	38173.6	38173.6	9687.04	9710.89	9677.56	9650.06	9661.54	9649.99	7765.47	7767.51	7770.34	7768.56	7766.34	7766.96
329		38825.1	42061.8	43784.4	41134.7	42700.6	41213.4	6393.73	6306.36	6174.77	6799.54	7014.49	6475.02	4907.05	5078.44	2996.01	3020.96	3222.35	2976.41	3646.85	3227.93	3175.38	4059.99	3572.28	3470.19	1703.09	1703.09	1703.09	1703.09	1703.09	1703.09	1703.09	1703.09	1703.09	1703.09	1703.09	1703.09	12248	11835.8	12402.9	12436.2	12157.9	12821	10080.6	10086.4	10081.8	10041	10040.2	10078.3
330		37615.9	41056.4	45136.7	44113.2	46433.1	46551.8	13119.2	13256.3	14617.6	13374.5	13604.5	13871.3	9578.75	10299.9	8381.35	11538.7	12113.6	10173.3	9672.08	9394.87	8774.17	9942.11	11661.9	9673.26	5371.39	5371.39	5371.39	5371.39	5371.39	5371.39	5371.39	5371.39	5371.39	5371.39	5371.39	5371.39	5879.05	6091.95	5903.31	5661.44	6375.31	6567.93	4369.06	4363	4334.93	4336.98	4353.87	4353.46
331		64306	62374.4	61653.2	64560.4	63156.4	61537.1	27648.5	28372	29441.8	28656.5	27321.9	26659.9	26183.9	28465.3	27532.1	28785.9	30479.1	28433.7	30219.6	29479.1	28333.2	26105.8	26108.6	29552	16675.6	16675.6	16675.6	16675.6	16675.6	16675.6	16675.6	16675.6	16675.6	16675.6	16675.6	16675.6	15271.9	14708.6	14178.8	14961.7	14900.2	14476.1	14415.7	14425.6	14434.2	14400.4	14414.5	14440.5
332		40352	35688.8	35392.5	41453.9	39120.2	33187.2	6735.08	7188.73	7681.35	7911.36	7430.98	7806.96	4787.31	4377	4061.01	5781.85	7146.78	6385.65	8475.67	5021.29	3235.49	4143.08	3988.14	3909.02	4344.19	4344.19	4344.19	4344.19	4344.19	4344.19	4344.19	4344.19	4344.19	4344.19	4344.19	4344.19	18789.1	18100.7	17176.8	18508.1	20086	18783.4	12647.7	12663.5	12611.6	12593.1	12626.9	12617.6
333		57836.3	56742.2	55756.1	56159.7	56016.5	56284.9	33006.1	33256.2	33371.1	33435.2	32997.8	32631.8	36817.5	38328.7	38041.2	37271.7	38816.6	37689.9	35941.4	36073.6	36372.8	37627.2	37243.3	36573.7	22193	22193	22193	22193	22193	22193	22193	22193	22193	22193	22193	22193	19549.4	19711.3	19680.1	19661.3	19966.3	18953.7	12003.5	12054.1	12031.2	12046.9	12095.6	12064.3
334		49752.9	52642.1	54903.3	53645.8	50710.1	50835.1	16887.3	16952.7	17780.9	16779.2	16348.7	17599.8	15376.8	16209.3	11918	7710.65	8386.8	11574.3	11914.8	8956.77	11748.8	11766.7	11850.8	8903.1	4732.48	4732.48	4732.48	4732.48	4732.48	4732.48	4732.48	4732.48	4732.48	4732.48	4732.48	4732.48	16864.9	16678.2	17601	17296.6	16863.1	18668.9	12569.5	12438.1	12436.3	12560.4	12540.1	12502.1
335		34069.2	35571.6	37114.2	36693.7	33734.1	31719.7	42932.2	44426.5	47443.3	46106.5	47223.8	47810	32035	33082.5	30524.4	31872.6	29403.2	30663.7	37179	30636.4	25897	29039.4	31044	27340.4	12631.1	12631.1	12631.1	12631.1	12631.1	12631.1	12631.1	12631.1	12631.1	12631.1	12631.1	12631.1	11673.9	11891	11399.5	10868.1	10920.8	10979.3	14904.4	14893.4	14901.5	14924.4	14968.4	14934.5
336		33479.5	33751.2	34043.6	33370.6	32421.6	32672.6	43005.2	42745.9	39983.9	41100.1	39266.8	36361.9	19295.5	35386.8	29426.2	24637.1	23070.7	28723.3	34824.3	22979.3	29184.9	29291.4	20339.7	22537.9	14664.4	14664.4	14664.4	14664.4	14664.4	14664.4	14664.4	14664.4	14664.4	14664.4	14664.4	14664.4	16259.2	15694.2	16472.7	16751.7	15563.1	15721.9	7933.43	7922.12	7908.44	7930.24	7946.12	7928.1
337		45404.3	46819.6	50545.2	54551	53322.6	44370.9	6348.13	6873.23	7071.53	7638.59	7510.83	7047.73	4797.6	4118.9	5573.49	7218.18	8081.54	6001	5928.03	7029.72	5684.05	3861.02	4163.81	4516.54	2787.71	2787.71	2787.71	2787.71	2787.71	2787.71	2787.71	2787.71	2787.71	2787.71	2787.71	2787.71	20167.3	20440.9	21583.9	22173.6	22947.8	22157.7	11937.3	11949.6	12004.2	11998.5	11992.8	11988.5
338		43617.8	44858	41535.7	41364.5	47351.2	46726.1	20120.2	18776.2	17098.3	17368	17664.9	17315.5	11106.3	14462	8010.3	9862.43	15046.2	20275.1	21429.2	17283.5	13928.2	9878.94	9568.49	8274.78	8753.45	8753.45	8753.45	8753.45	8753.45	8753.45	8753.45	8753.45	8753.45	8753.45	8753.45	8753.45	17135.3	16399.7	16285.4	17442.3	17314.5	17178	13176.2	13113.1	13122.4	13159	13173.9	13220.7
339		57199.7	53988.2	45223	47703.6	49142.2	47440.1	24672.9	24240.9	21313.5	20984.5	25700.9	27318.5	20580.7	13994	13399.4	14627.8	12099	11693.8	12685.4	13791.5	20585.5	24503.8	22399	25394	10732.5	10732.5	10732.5	10732.5	10732.5	10732.5	10732.5	10732.5	10732.5	10732.5	10732.5	10732.5	18761.2	18062.7	17192.3	16994.5	16855.8	17507.7	12506.3	12526.6	12482.9	12424.5	12440.3	12466.5
340		45566.1	45786.5	45059.2	45450.6	43767.6	41570.8	38276.7	38143.4	36975.6	38225	39780.3	38561.5	35574.6	35773.9	38975.7	46749.6	36703.6	33965.7	42076.9	41999	35757.8	34429.9	33730.7	38345.3	22090	22090	22090	22090	22090	22090	22090	22090	22090	22090	22090	22090	10700.8	10580.9	10765.7	10780.7	10949.7	11499	13851.5	13839	13837.7	13842.5	13844.7	13838.9
341		53718.7	51838.9	48498	49822.6	52251.7	47559.6	7273.21	7637.12	8086.49	8298.32	8337.97	8348.56	4395.45	4278.03	5323.65	6195.09	8330.87	5996.95	3226.57	5357.97	3248.64	3004.59	8002.46	9250.7	4197.21	4197.21	4197.21	4197.21	4197.21	4197.21	4197.21	4197.21	4197.21	4197.21	4197.21	4197.21	18017	17754.7	17301.4	17261.3	17674.8	18288.2	4645.29	4641.08	4642.9	4640.55	4637.01	4643.07
342		24220.4	24142.4	25546.2	27698.1	25909.3	23493.8	8464.18	8921.8	8856.04	8679.82	8608.37	8596.66	8863.53	9518.45	9072.02	8107.46	8713.78	8269.34	7173.53	7469.75	8245.81	8794.44	9382.61	8006.75	4837.5	4837.5	4837.5	4837.5	4837.5	4837.5	4837.5	4837.5	4837.5	4837.5	4837.5	4837.5	14200.4	13738.5	12975.1	13279.3	13439.4	13150.1	15429.9	15409.6	15421.5	15466.5	15487.5	15454.5
343		62300	59717.9	60667.7	60790.2	57802	61986.1	1631.31	1591.46	1511.35	1405.87	1282.72	1414.71	1452.8	1146.74	1279.15	1298.41	911.301	1501.97	1419.99	927.55	800.654	867.449	1315.15	1172.1	957.9	957.9	957.9	957.9	957.9	957.9	957.9	957.9	957.9	957.9	957.9	957.9	9274.48	9800.83	10436.3	9712.77	10189.6	9817.34	7789.14	7827.8	7822.47	7847.45	7880.8	7876.15
344		33649.5	30057.8	27457.3	28469.2	28832.5	33969.2	587.98	571.179	606.321	590.264	569.588	580.175	370.585	275.562	288.677	365.433	469.437	322.312	313.771	398.293	313.558	273.932	373.625	349.302	171.861	171.861	171.861	171.861	171.861	171.861	171.861	171.861	171.861	171.861	171.861	171.861	19874	20816.2	20778.5	20517.4	20254.8	19823.8	8011.88	7975.83	7968.74	7964.14	7946.94	7944.49
345		21216.8	22077.1	22564.6	21749.6	22342	22696.8	37103.7	37225.5	37885.9	35785.6	36130.4	38175.1	16151.8	15654.2	18339.4	16326.4	17768.5	16399.7	17230.2	18033.1	17588	19196.7	17792	17658	12355.4	12355.4	12355.4	12355.4	12355.4	12355.4	12355.4	12355.4	12355.4	12355.4	12355.4	12355.4	10829.3	11017.2	10843.4	10112.3	9888.77	10121.1	9222.31	9235.26	9208.05	9221.47	9226.46	9221.87
346		26750.8	26740.5	26437	26424.9	28691.7	30157	5017.64	4804.41	4850.96	4811.63	4440.52	4706.42	2809.59	2212.4	2490.54	3287.76	2814.12	2430.8	3728.62	3245.21	2300.2	2301.33	3083.54	4219.67	1783.73	1783.73	1783.73	1783.73	1783.73	1783.73	1783.73	1783.73	1783.73	1783.73	1783.73	1783.73	21696	21291.7	20957.3	20840.8	21281	21483.6	4956.6	4963.13	4945.43	4951.79	4955.98	4959.4
347		48316.7	47247.6	43629.5	43952	43994.9	43453.2	1682.44	1684.76	1656.5	1667.71	1674.78	1653.55	948.411	823.485	713.869	825.756	793.325	888.139	886.063	806.585	883.649	951.815	653.836	597.83	555.895	555.895	555.895	555.895	555.895	555.895	555.895	555.895	555.895	555.895	555.895	555.895	17708.3	18024.9	19144.8	18986.4	19005.7	18322.7	5719.32	5721.91	5706.77	5714.91	5732.32	5771.71
348		39721.1	38687.7	36683.2	39490.1	36758.7	34361.2	16587.5	16969.7	17286.6	16423	16956.2	18315.4	16087	10583.5	12071.7	13539	11385.9	18383.8	21234	10971.5	10800.4	9374.2	7946.98	11414.6	4963.09	4963.09	4963.09	4963.09	4963.09	4963.09	4963.09	4963.09	4963.09	4963.09	4963.09	4963.09	14126.6	13911.9	13145.4	12668	14156.5	14750.2	10075.6	10090.7	10080.1	10079.1	10150	10112
349		41614	41856.7	39234.7	40470.3	49324	48131	31683	31718.2	34071.9	35301.4	34356.6	33917.4	28223.4	29611.4	35881.9	23920.5	24648.3	44196	36880.3	26331.2	33936.6	35365.8	39218.8	24929.6	9231.95	9231.95	9231.95	9231.95	9231.95	9231.95	9231.95	9231.95	9231.95	9231.95	9231.95	9231.95	12059.5	11926.1	11904.8	12087	11999.4	11991.1	12025.2	12009	11983.2	11996.2	12027.7	12025.3
350		12933.1	12975.8	12944	12897.6	12959.8	12933.9	35381.7	35601.4	35376.9	35304.4	35242.1	35287.8	42582	42321.1	41955	41764.5	41721.3	41628.8	41769.5	41853	41709.6	41781.5	42400.8	41982.9	24714.4	24714.4	24714.4	24714.4	24714.4	24714.4	24714.4	24714.4	24714.4	24714.4	24714.4	24714.4	15964.5	15955.6	16004.5	16065.1	16004.2	15921.3	2499.24	2500.48	2500.79	2500.25	2499.08	2499.7
351		52883.6	55013.9	49663.2	47750.8	49025.6	48840.9	3832.17	3648.9	3547.96	3606.62	3792.37	3737.1	2297.21	2597.84	3488.68	2877.58	2726.67	3833.39	3378.58	3051.62	2216.5	2177.9	2112.07	2829.6	1847.44	1847.44	1847.44	1847.44	1847.44	1847.44	1847.44	1847.44	1847.44	1847.44	1847.44	1847.44	16870.6	16181.2	16179	16575.9	15439	15300.7	10110	10136	10081	10082.8	10071.7	10053.1
352		40443.6	42822.1	46235.4	43487.2	44424.9	45962	42465.9	42692	42859.3	44283.1	44939.8	42569.9	36869.4	36531.6	31650.1	30985.8	36918.5	44650.9	40765.4	44543.5	35924.6	27103.1	36204.2	47106.9	21094.8	21094.8	21094.8	21094.8	21094.8	21094.8	21094.8	21094.8	21094.8	21094.8	21094.8	21094.8	16706.7	15648.9	15802	16996.4	16369.2	16172.5	10181.1	10162.7	10224.2	10272.8	10222.2	10166.9
353		33546.9	33546.9	33546.9	33546.9	33546.9	33546.9	30820	30820	30820	30820	30820	30820	11492.2	11492.2	11492.2	11492.2	11492.2	11492.2	11492.2	11492.2	11492.2	11492.2	11492.2	11492.2	8009.72	8009.72	8009.72	8009.72	8009.72	8009.72	8009.72	8009.72	8009.72	8009.72	8009.72	8009.72	8350.74	7895.76	7822.1	8189.26	7789.67	8104.78	5068.32	5054.93	5052.12	5067.29	5097.62	5082.69
354		43415.7	44180.5	39629	38554.2	39440.3	37795.2	12243.3	13370.7	13755.2	13973.5	13803.8	12342	10891	9797.29	8678.25	10682.8	7436.36	7150.45	12121.8	10436.6	10653.8	9953.97	9642.62	8861.72	5191.08	5191.08	5191.08	5191.08	5191.08	5191.08	5191.08	5191.08	5191.08	5191.08	5191.08	5191.08	14391.5	14413.2	14471.3	14674	14654.2	14225.4	5534.57	5540.05	5545.89	5543.29	5543.57	5541
355		30796.8	30845.6	32996.6	35639.2	38364.5	35984.8	26029	27502.5	28169.4	26457	26681.1	26505.5	11023.8	13850.1	21675.2	15395.5	15503.8	19624.4	18035.8	16353.9	15061.9	16115.8	18192	16340.4	8501.04	8501.04	8501.04	8501.04	8501.04	8501.04	8501.04	8501.04	8501.04	8501.04	8501.04	8501.04	19305.6	19249.3	18597.6	18284.6	19253.5	19768	5341.91	5335.06	5318.31	5318.41	5322.46	5324.57
356		27147.7	25522.1	23931.5	26024.4	27763.5	26653.3	15106.9	14910.3	15872.8	16331.7	15371.6	15535.6	10110.8	9756.22	10284.1	9626.88	8774.56	10239.3	13331.7	11085.2	7763.46	8567.48	9374.16	7715.26	5277.23	5277.23	5277.23	5277.23	5277.23	5277.23	5277.23	5277.23	5277.23	5277.23	5277.23	5277.23	11674.6	11674.6	11674.6	11674.6	11674.6	11674.6	2587.18	2587.18	2587.18	2587.18	2587.18	2587.18
357		53915	57707.2	56395.9	51298	53064.2	58772.6	28182.7	26087.1	27410.5	29308.4	29291.7	29726.7	21242.4	9762.46	11286	14966.4	9118.2	9739.07	11053.6	23103	23301.9	16250.4	17919.8	12207.5	10540.1	10540.1	10540.1	10540.1	10540.1	10540.1	10540.1	10540.1	10540.1	10540.1	10540.1	10540.1	11738.7	11715	11662.7	11686.1	11713.5	11687.1	11836.7	11836.1	11836.3	11838.5	11838.1	11836.7
358		41380.2	42357.9	48737.1	45591.4	38567	41664.3	758.857	739.336	736.62	755.626	754.188	721.544	388.545	332.857	289.274	457.603	410.545	386.51	405.384	467.684	696.692	473.475	352.665	468.607	464.75	464.75	464.75	464.75	464.75	464.75	464.75	464.75	464.75	464.75	464.75	464.75	21041.2	18822.4	17095.2	17742.5	17360.7	19363.9	6805.83	6775.74	6792.01	6834.82	6820.83	6785.8
359		21336.7	19955.2	19600.1	20924.9	20154	19926.5	53940.4	56421.1	55549.2	55232.7	55382.4	53001.2	48689.1	47876.5	47509.5	50848.1	50736.9	56102.3	61591.8	56966	61776.9	63939.2	60623.9	54430.5	31926.5	31926.5	31926.5	31926.5	31926.5	31926.5	31926.5	31926.5	31926.5	31926.5	31926.5	31926.5	17575.6	17479.4	16932.8	17072.5	18353.1	17950.3	7033.16	7049.44	7086.23	7074.23	7059.79	7061.1
360		62390.7	58400.2	56377	61673.2	62099.5	58903.1	3901.02	4046.13	3795.75	3759.47	3833.57	3897.8	3797.89	3745.93	5445.63	4666.37	3416.69	2987.74	3308.32	3786.9	4183.08	4160.62	3515.23	3277.22	2100.71	2100.71	2100.71	2100.71	2100.71	2100.71	2100.71	2100.71	2100.71	2100.71	2100.71	2100.71	18748.5	18425.3	18627.1	19119.7	18546.4	19105.9	7493.99	7458.39	7453.82	7482.94	7453.6	7439.76
361		44039.1	43872.1	42404.8	40811	41565.8	44273.9	15520.3	14651.8	14971.1	15670.8	15443.5	14765.4	6136.68	7492.79	9804.1	10666.7	8849.7	8333.58	9151.02	9066.59	8635.11	9943.62	12804.7	10051.5	4592.86	4592.86	4592.86	4592.86	4592.86	4592.86	4592.86	4592.86	4592.86	4592.86	4592.86	4592.86	11800.4	11667	12114.1	12198.4	11506.5	11419.1	12976.2	13012.6	12968.7	12953.3	12946.9	12975.5
362		52159.2	51547.2	53519	57244.9	55058.3	53890.1	12053.1	11576.4	11736.4	11754.3	11992.8	12342.8	11841.1	10964.6	11681.2	13040.8	11601.7	11050.9	12326.4	12561.1	13847.5	14793.6	12885.2	13027	7173.62	7173.62	7173.62	7173.62	7173.62	7173.62	7173.62	7173.62	7173.62	7173.62	7173.62	7173.62	14999	15381.7	16196.6	16084.7	15898.1	15724	6778.52	6785.69	6795.31	6791.31	6771.77	6761.09
363		38533.8	36904.4	34513.8	35997.3	34169.3	30575.9	1766.61	1719.28	1807.6	1955.11	2131.59	2065.06	949.493	951.278	1157.18	2023.99	2849.23	1933.81	1317.38	1563.11	1562.18	1068.47	1009.77	1379.07	737.943	737.943	737.943	737.943	737.943	737.943	737.943	737.943	737.943	737.943	737.943	737.943	16521.2	16688.4	16379.2	16114.8	16550.2	16213.6	3872.96	3879.55	3866.96	3874.28	3886.24	3892.1
364		46669.9	46679.6	46820	46820.2	46725.9	46748.7	978.946	977.878	976.864	978.974	979.755	978.107	1194.2	1194.47	1194.13	1195.17	1183.56	1174	1191.14	1198.09	1194.03	1194.59	1195.57	1198.98	708.291	708.291	708.291	708.291	708.291	708.291	708.291	708.291	708.291	708.291	708.291	708.291	17101.6	17786.1	17978.1	17446.3	17544.5	18055.3	12766.4	12706.1	12705.2	12749.9	12724.7	12711.3
365		34791.6	33849.4	34730.2	37061	33825	33891.2	28814.4	28113.7	28200.9	27217.7	27676.4	26934.4	15788	17490.6	21064	22777.4	37503.5	41694.6	27725.2	22523.1	18287.5	20709.8	26341.4	27913	17793.8	17793.8	17793.8	17793.8	17793.8	17793.8	17793.8	17793.8	17793.8	17793.8	17793.8	17793.8	21846.3	20495.2	19233.9	21097.8	22217.4	21113.1	13558.2	13525.7	13500.1	13530	13597.5	13609.8
366		53698.4	51376.9	46486.3	52597.8	54910.3	47262.9	12310.4	12805	13448.9	12767.5	12277.7	12670.8	8477.72	8114.5	8339.85	6691.61	5355.08	8811.6	10130.5	6620.06	6132.19	5813.9	6541.24	9592.41	6829.13	6829.13	6829.13	6829.13	6829.13	6829.13	6829.13	6829.13	6829.13	6829.13	6829.13	6829.13	9114.11	9382.85	9834.98	10135.3	10379.5	9791.06	8290.88	8292.83	8318.24	8327.59	8343.06	8308.17
367		29635.5	29709.8	29615	29423.4	29260.2	29299.6	2840.01	2838.97	2835.37	2842.76	2855.26	2849.09	1105.93	1084.92	1102.16	1115.8	1088.2	1094.36	1101.32	1095.43	1103.66	1109.76	1111.06	1121.77	755.474	755.474	755.474	755.474	755.474	755.474	755.474	755.474	755.474	755.474	755.474	755.474	10642.2	9933.41	9817.78	10129.1	10254.5	10618.9	12771.3	12807.2	12788.7	12752.5	12767.6	12761.5
368		36438.3	36527.3	39060.1	38938	37098.7	38663.2	19569.9	18861.7	18284.1	19865.7	19993.7	18796.7	9913.66	7452.72	7627.18	7802.03	8713.22	13911.9	13277.6	10982.4	8760.27	6929.92	7341.08	9041.76	4679.37	4679.37	4679.37	4679.37	4679.37	4679.37	4679.37	4679.37	4679.37	4679.37	4679.37	4679.37	23541	22371.7	19749.5	20225.6	21565	21885.6	14431.3	14406.7	14369.4	14392.1	14435.8	14416.6
369		43971.4	43959.4	47019.7	47373.5	43704.9	43729.5	37556.7	37056.9	37046.8	37065.2	36802.7	38902.7	34532.1	30638.8	34374.3	37110.5	38274.6	33672.5	36583.8	39773.7	38967.6	42731.3	33155.8	34910.7	24245.3	24245.3	24245.3	24245.3	24245.3	24245.3	24245.3	24245.3	24245.3	24245.3	24245.3	24245.3	6528.99	6498.72	6645.19	6657.66	6857.23	7124.56	8831.4	8810.32	8792.24	8811.58	8791.51	8783.9
370		53637.2	54452.1	49906.8	48442.6	55304	56300	2602.9	2457.52	2660.11	2660.05	2560.79	2597.54	2265.45	2747.89	2261.14	1917.32	2195.97	3131.67	2778.96	2332.85	3018.76	2528.65	3259.71	3596.06	1738.59	1738.59	1738.59	1738.59	1738.59	1738.59	1738.59	1738.59	1738.59	1738.59	1738.59	1738.59	21191.1	21796.2	21679	19473.6	19934.1	21437.7	9086.81	9069.23	9077.11	9078.58	9113.17	9165.24
371		33183.6	35412.2	40515.1	37208.7	34130	35026.7	13203.5	13197	13353.2	13038.5	13180.3	13713.1	10149.1	13763.3	12691.8	9568.14	10151.3	8493.89	6171.53	6361.03	6207.85	6292.75	7326.85	8417.08	5373.36	5373.36	5373.36	5373.36	5373.36	5373.36	5373.36	5373.36	5373.36	5373.36	5373.36	5373.36	13687.1	14291.7	14587.2	13229.5	12640	13485.5	12891.3	12879.1	12844.9	12898.5	12884.5	12823.8
372		50691.5	51700.3	51451.2	52846.1	53147.4	50076.4	3011.88	3026.38	3057.03	3075.94	2989.69	2955.32	2996.65	3166.71	2743.82	2689.72	3049.98	3148.64	2954.43	2909.29	3030.84	3169.17	3199.02	2919.81	1772.5	1772.5	1772.5	1772.5	1772.5	1772.5	1772.5	1772.5	1772.5	1772.5	1772.5	1772.5	20729.9	20868.5	20878.2	21919.2	21731.2	20699	7792.65	7789.88	7781.12	7790.96	7778.05	7772.85
373		51393.9	53441.6	51669.1	50137.7	49804.2	47808.8	27339	27385.1	29299.4	30317.4	27084	27583.1	25078.7	19356.5	19168.8	16112.1	17498	22126.3	19244.3	24087.4	29613.4	14529	11740.2	16509.4	8671.84	8671.84	8671.84	8671.84	8671.84	8671.84	8671.84	8671.84	8671.84	8671.84	8671.84	8671.84	13220.4	13592	13590.2	13916.4	14353	14171.6	4676.12	4673.57	4676.6	4646.45	4647.82	4662.39
374		63714	58972.9	58557.1	72842.1	73027.7	57960.2	48263	55479.6	55397.7	46028.9	49964.6	53574.3	35619	49542.1	50350.3	40008.4	46272.6	53560.2	45712.3	36932.6	51772.7	45952.4	36221.5	48369	21589.5	21589.5	21589.5	21589.5	21589.5	21589.5	21589.5	21589.5	21589.5	21589.5	21589.5	21589.5	15835.1	15415.1	15987.2	17212.8	16509.5	15900.6	4262.55	4228.16	4238.55	4289.35	4286.73	4290.06
375		47890.3	49185.2	47483	46232.5	47423.6	47729.6	49324.2	47399.1	48401	48024.3	50227.1	51190.3	69578.2	72029.6	73016.5	71103.8	71019.8	72020.7	70084.1	74597.6	69657.7	62641.6	71825	73003.8	43929.9	43929.9	43929.9	43929.9	43929.9	43929.9	43929.9	43929.9	43929.9	43929.9	43929.9	43929.9	15332.2	15050	15441.9	15787.7	15808.4	16150	8225.07	8231.84	8230.12	8215.58	8220.3	8233.34
376		51931.5	50948.9	48595.5	47858.6	50338.9	54020.5	4194.76	4096.16	4233.3	4135.84	4205.81	4258.19	4077.84	4145.41	4698.09	4632.15	4473.59	4854.78	5223.14	4991.4	4227.83	4207.41	4260.94	4265.77	2580.95	2580.95	2580.95	2580.95	2580.95	2580.95	2580.95	2580.95	2580.95	2580.95	2580.95	2580.95	15981.2	15380	14555	14872.8	14502.9	14689.8	14655.6	14598.3	14564.8	14581.4	14582.5	14662.4
377		15747.8	15963	16383.7	16601.8	17720.7	18814.2	14680.6	14549	13082.6	12469.6	13663.8	12741.2	6173.75	7799.7	9843.72	10180.1	6381.56	6929.64	7940.33	7130.17	11948.1	8504.49	5539.38	12175.9	7604.52	7604.52	7604.52	7604.52	7604.52	7604.52	7604.52	7604.52	7604.52	7604.52	7604.52	7604.52	7874.83	7755.93	7832.99	7727.09	7591.96	7731.42	6742.14	6754.34	6757.96	6735.51	6744.7	6768.11
378		46590.5	43871	42071	43184	41165.8	44648.9	239.847	219.369	209.155	214.674	210.652	211.533	119.039	97.297	97.1825	106.376	113.837	120.197	103.061	93.933	89.4718	103.945	113.809	121.274	97.576	97.576	97.576	97.576	97.576	97.576	97.576	97.576	97.576	97.576	97.576	97.576	16733.6	16608.2	16536.6	16475.4	16463.4	16302.9	9261.64	9290.54	9305.99	9278.06	9263.74	9272.85
379		58515.2	55759.6	58951.9	62783.6	57888.1	56952.8	43209.8	45010.5	46190.9	44119.1	43890.8	42727.3	36580.2	45640.8	37629.7	37510.4	45264.5	41206.2	39254.8	46617.6	46626	37944	39176.5	39413.5	23786.8	23786.8	23786.8	23786.8	23786.8	23786.8	23786.8	23786.8	23786.8	23786.8	23786.8	23786.8	16904.7	17365.7	15864.3	15728.5	18092.9	19143.3	11852.4	11791.3	11730.8	11603.2	11618.8	11783.1
380		27307.2	25180.5	23332.8	25990.4	30161.5	30145.9	2190.38	2214.89	2437.07	2323.77	2111.52	2093.98	1171.6	1227.87	1193.95	1157.77	997.567	1025.95	927.598	1588.11	1661.25	1163.45	1555.96	1326.11	612.767	612.767	612.767	612.767	612.767	612.767	612.767	612.767	612.767	612.767	612.767	612.767	10970.2	10978.7	10972.2	10951.1	10874.3	10867.1	7614.92	7615.34	7614.44	7613.54	7612.4	7613.48
381		39540.9	41384.1	39557.5	37859.2	38052.1	35551.9	3956.08	3986.8	4056.43	4062.08	3959.55	3788.1	4751.22	5361.08	5432.8	5573.98	5186.95	5439.21	6026.2	5189.03	4992.17	5220.94	5566.54	6587.66	3868.8	3868.8	3868.8	3868.8	3868.8	3868.8	3868.8	3868.8	3868.8	3868.8	3868.8	3868.8	19161	18771.1	19410.6	19611	19727.8	20221.7	7009.59	7008.76	7009.65	7006.69	7023.04	7023.29
382		30584.6	30472.7	29660.3	31289.7	32602	30313.2	15162.7	14978.1	14556.2	14424.6	14465	14886.4	8789.24	8764.71	5972.13	5951.04	7829.7	8802.81	7673.91	5639.63	7631.19	7877.9	7700.7	8427.58	4578.22	4578.22	4578.22	4578.22	4578.22	4578.22	4578.22	4578.22	4578.22	4578.22	4578.22	4578.22	14427.4	14525.9	12853	12508	14468.5	14037.1	3509.04	3515.12	3506.95	3516.72	3529.36	3515.27
383		41797.2	44234.2	40634	34747.5	37713.9	40892.3	19794.2	19812.1	19921.6	20090.1	19280.4	19431.7	19453.4	21160.6	17108.4	15001.6	18670.4	18963.3	15963.5	17346.6	21753.8	21425.8	16916.7	18050.2	14796.5	14796.5	14796.5	14796.5	14796.5	14796.5	14796.5	14796.5	14796.5	14796.5	14796.5	14796.5	15372.9	15375.4	15323.7	15895.8	15212	14150.9	7991.83	8024.2	7969.32	7943.83	7981.82	8007.56
384		38556.5	38866.8	37652.3	37902.6	37726.6	36772.9	26542.5	26759.4	26978.5	27018.3	26412.8	25953.3	26911.4	28213.7	26898.4	27378.5	28911.1	26836.3	26560.9	28484.7	27652	26576.2	24336.8	23910.5	16079.8	16079.8	16079.8	16079.8	16079.8	16079.8	16079.8	16079.8	16079.8	16079.8	16079.8	16079.8	16056.7	16061.5	15710.7	15779.1	15917.8	15754.2	9847.32	9857.82	9874.59	9860.19	9865.45	9884.16
385		53695.4	53160.3	50432.2	52262	57041.2	55237.7	45590.6	43802.6	44344.8	47401.3	48726.9	49071	52503.5	44026.3	38169.1	35048.8	32765.9	33973.7	44052.3	50213.9	43753.2	45385.4	41947.1	39317.9	29307.3	29307.3	29307.3	29307.3	29307.3	29307.3	29307.3	29307.3	29307.3	29307.3	29307.3	29307.3	14636.7	14819	14522.6	14062.8	14119.8	14303.5	8776.04	8783.01	8784.74	8775.47	8780.17	8788.74
386		26845.4	26908	25714.7	24687.6	24562.6	25133.3	31591.3	31228.1	29186.9	29140.1	31172.4	31026	16620.7	17435.7	13633.5	16634.8	25748.2	26749.8	25305.7	21437.9	20690.6	21266.8	27110.3	24713.7	9213.34	9213.34	9213.34	9213.34	9213.34	9213.34	9213.34	9213.34	9213.34	9213.34	9213.34	9213.34	9627.99	9610.49	9855.06	9769.92	9276.71	9011.16	8749.29	8750.43	8730.39	8771.33	8770.3	8729.73
387		58365.2	59017.9	62926.4	64379.6	64217.6	69820.6	28913.4	26025.4	26716.8	27687	28321.3	26999	22667.7	30516	33397.4	29041.1	31787.1	33803.1	27606.3	26163.9	24856.1	25971.9	25313.5	29617	19617.5	19617.5	19617.5	19617.5	19617.5	19617.5	19617.5	19617.5	19617.5	19617.5	19617.5	19617.5	19369.2	19360.4	21582.1	22473.6	23402.6	23770	13393.5	13401.3	13420.1	13399.9	13367.8	13348.8
388		57387	55616.2	53756.5	55027.6	56340.8	55292.4	5028.33	5071.57	5247.52	5116.42	5071.81	5343.16	4462.73	4212.58	4296.08	4570.63	5477.25	5765.23	6972.58	6478.25	4893.07	4790.43	5708.16	6025.33	3393.75	3393.75	3393.75	3393.75	3393.75	3393.75	3393.75	3393.75	3393.75	3393.75	3393.75	3393.75	20648.4	19625.1	19682.9	21170.3	21535.5	21684	4924.18	4906.71	4898.02	4912.13	4915.35	4905.53
389		54741.4	57818.2	58564.3	58720.6	56533.9	57079.5	29732	27894.6	32770.4	32199.7	31713.9	31506.7	23156.9	27636.1	35443.9	31882.1	25463.1	27456.4	26098.1	19859.8	19381	23146.1	34932.8	41025.3	15596.1	15596.1	15596.1	15596.1	15596.1	15596.1	15596.1	15596.1	15596.1	15596.1	15596.1	15596.1	15126.2	15686.5	16472.9	15997.7	15881.9	15364.7	9144.73	9182.42	9158.38	9112.57	9154.37	9171.01
390		24750.3	22886.7	23278.8	26700.2	27112.7	24196.9	13025.9	13197.2	13390.5	15171.3	13977.9	13002.2	6871.92	5753.48	7813.39	9234.76	6461.75	6548.47	6225.18	7215.7	9434.68	11783.8	12462	12158.7	6029.61	6029.61	6029.61	6029.61	6029.61	6029.61	6029.61	6029.61	6029.61	6029.61	6029.61	6029.61	16698.9	16660.7	16482.8	16436.4	16569	16647	10106	10104.5	10108.2	10109.9	10106.1	10101.7
391		55923.7	58107.8	62635.9	62082.4	58702.4	57256.1	49406.5	50195.6	50915.4	50956.6	49995	49448.8	63092.3	60273.6	44484.7	45464.7	39144.6	37801.2	48346.4	52903.9	50605.8	46554	41043.2	43369.6	27401.1	27401.1	27401.1	27401.1	27401.1	27401.1	27401.1	27401.1	27401.1	27401.1	27401.1	27401.1	15345.5	15770.5	17331.2	17714.2	16685.1	16488.6	10602.7	10614.6	10582.9	10502	10510.4	10521.7
392		52697	50941.7	52204.3	52837	51009	50624.7	19205.1	19923.6	19903	19672.4	19877.7	19785.8	15287.6	18886.6	19905	17106.4	17958.4	15212	13608.1	14656.5	16919.9	15900.9	16678.9	16481.3	8644.23	8644.23	8644.23	8644.23	8644.23	8644.23	8644.23	8644.23	8644.23	8644.23	8644.23	8644.23	13302.5	13776.1	12995.4	11658	12083.3	12476.7	8278.5	8300.95	8320.14	8304.75	8268.35	8315.03
393		56279.3	58536.8	62765.6	64700.9	63552.4	59189.6	14530.2	14790.2	14736.2	14917.2	15070.9	14577.2	13493.6	13929.1	14255.1	13979.7	15059.8	15152.3	15922.9	18012.6	17150.1	16027	18433	17053.5	8924.11	8924.11	8924.11	8924.11	8924.11	8924.11	8924.11	8924.11	8924.11	8924.11	8924.11	8924.11	9277.08	9124.28	9327.86	9768.65	9728.8	9473.96	9000.21	9017.66	9034.93	8998.99	9013.65	9064.4
394		44659.4	47440.8	49228.7	46855.5	43566.7	41843.8	17675.2	17178.4	17103.7	18417.3	17250.4	17706.5	16279	11944.4	10172.9	11466	11211.7	11110.9	11999.3	8269.32	6798.74	10419.2	13902.6	8817.46	4369.37	4369.37	4369.37	4369.37	4369.37	4369.37	4369.37	4369.37	4369.37	4369.37	4369.37	4369.37	23402.3	22979	22922	22989.8	22981.1	23788	10518.2	10505.5	10551.5	10561.6	10570.2	10535.6
395		49858.9	45889.7	45179.4	47776.7	51831.5	51347.7	29427.8	33615	35154	32421.2	29706.6	32199.2	39120.9	34356.8	27050.6	25722.4	45418.9	45652.3	25427.9	23039.8	22234.2	21856.6	23430.5	17932.4	12450.2	12450.2	12450.2	12450.2	12450.2	12450.2	12450.2	12450.2	12450.2	12450.2	12450.2	12450.2	10299.8	10299.8	10299.8	10299.8	10299.8	10299.8	6781.7	6781.7	6781.7	6781.7	6781.7	6781.7
396		43363.2	43706.4	45140.8	44509.4	46174.6	45993	2515.09	2562.91	2527.2	2536.27	2499.44	2590.55	2837.77	2484.88	2608.26	2445.08	2463.88	2557.35	2597.93	2861.8	2646.84	2579.65	2699.66	2885.19	1585.82	1585.82	1585.82	1585.82	1585.82	1585.82	1585.82	1585.82	1585.82	1585.82	1585.82	1585.82	4501.83	4350.49	4282.93	4597.26	4852.77	4649.69	8557.12	8550.04	8589.64	8597.68	8600.96	8598.8
397		41114.7	40484	40318.6	42226.7	40168.6	36113.9	17858.4	18845.9	19450.5	18881.6	19721.4	19280.3	7806.58	10777.6	11205.9	9979.98	11909.5	13379.1	10632.3	11418.6	11576.2	10680.7	7866.88	9772.95	9103.27	9103.27	9103.27	9103.27	9103.27	9103.27	9103.27	9103.27	9103.27	9103.27	9103.27	9103.27	14101.5	14051.2	14254.8	14764.1	14574.2	13838	4201.42	4209.19	4209.56	4207.5	4193.45	4203.94
398		60987.9	58573.3	57599.5	58776.9	61456.7	65196	7657.35	7509.6	7473.13	7650.67	7232.35	7060.47	6741.74	6496.39	6215.95	6204.73	6494.36	6374.4	6428.05	7018.57	6532.31	5802.34	5877.97	8185.36	5185.7	5185.7	5185.7	5185.7	5185.7	5185.7	5185.7	5185.7	5185.7	5185.7	5185.7	5185.7	14467.2	14818.8	15842.3	16323.8	16101.7	14753.5	9124.99	9124.37	9083.58	9146.48	9222.29	9199.57
399		32617.3	32718.4	33681	33137.2	32337.4	36991.1	18015.2	16530.9	16454.3	15932.3	15954	16444.4	9627.63	9826.11	7827.78	6838.17	8351.65	12256.4	17400.4	13415.4	12087.9	12373.9	13293	13800	6007.88	6007.88	6007.88	6007.88	6007.88	6007.88	6007.88	6007.88	6007.88	6007.88	6007.88	6007.88	13457.7	13835.3	14479.9	14616.7	14342.1	13025.9	8058.85	8111.11	8128.68	8112.17	8107.22	8063.79
400		46560.5	45105.1	46281.5	46878.4	46778	51478.9	28896.5	26460.2	25546.3	27475.8	26696.5	26490.6	19369.9	17903.5	22314.2	26062.2	37956.2	33971.5	23237.4	18507.6	21746.9	24051.5	23579	22035	12578.7	12578.7	12578.7	12578.7	12578.7	12578.7	12578.7	12578.7	12578.7	12578.7	12578.7	12578.7	9057.87	9670.67	9032.4	7309.13	8132.45	9468.74	2593.85	2594.58	2607.19	2609.43	2600.6	2602.83
401		69623.5	65067.2	60040.7	63142.1	64699.5	63197.6	11221.7	11022.5	11471.1	12026.8	12210.4	11749.4	9411.03	10066.6	9168.74	10028	10496.2	11535.4	11425.3	10577.3	10560.1	13780.8	12674.1	9509.84	5506.87	5506.87	5506.87	5506.87	5506.87	5506.87	5506.87	5506.87	5506.87	5506.87	5506.87	5506.87	15719.7	15732.2	17459.9	16932.7	14016.8	14580.9	10166.1	10162.8	10176.6	10157.5	10151.9	10154.1
402		62960.7	55326.8	46372.9	51930.5	58606.3	60079.1	7441.78	7357.77	7361.81	7182.01	6649.26	6661.01	4859.49	7202.56	8105.59	5480.22	6420.99	9834	5839.29	3620.07	3177.72	2986.57	6470.99	8431.48	2889.21	2889.21	2889.21	2889.21	2889.21	2889.21	2889.21	2889.21	2889.21	2889.21	2889.21	2889.21	18308.2	18246.3	17726.6	17236.7	16491.1	17267.5	14831.5	14851.3	14778.4	14757.6	14749.2	14718.9
403		22778.2	22626.8	22586.3	23605.9	26199.9	24591.9	44284.5	44995.7	42476	42956	44615.2	43957.9	34977.8	40012.9	42869.8	40704.2	45572.7	45410.5	39838	35564.3	37050.4	34383.3	34649.8	39488.5	22438.6	22438.6	22438.6	22438.6	22438.6	22438.6	22438.6	22438.6	22438.6	22438.6	22438.6	22438.6	11890.2	11650	11139.7	11769.3	12390.5	11374.6	1169.61	1172.78	1172.45	1173.63	1175.12	1176.63
404		36859.1	39196.3	39543.8	36002.7	33256.3	31469.3	10852.2	11496.3	11659.7	11676.5	11478.3	11134.7	4695.96	4474.23	5481.95	6692.21	5083.55	4509.43	6184.34	9367.48	5842.61	4444.5	5548.7	6410.73	5451.19	5451.19	5451.19	5451.19	5451.19	5451.19	5451.19	5451.19	5451.19	5451.19	5451.19	5451.19	16566.9	16498.2	16192.2	16175.1	16936.7	16793.4	6996.58	7007.28	7025.6	7024.06	7014.3	7009.96
405		43307.9	42575.2	41583.2	40960	40162.2	39122.5	15630.2	15783.7	16313.3	16731.6	16129.7	16332.9	9017.53	10102	9151.48	8797.73	8649.85	7255.39	6933.74	7587.93	8979.67	7771.94	6705.19	8299.2	5674.49	5674.49	5674.49	5674.49	5674.49	5674.49	5674.49	5674.49	5674.49	5674.49	5674.49	5674.49	15574.7	15438.8	15089.1	15416.1	15645.4	15332.5	9870.36	9867.53	9873.33	9879.12	9874.66	9867.2
406		54219.4	52090.2	45012.9	45702	48345.7	44604.9	3546.65	3734.59	3760.72	3622.1	3570.03	3689.51	2337.36	2005.16	1599.1	2260.22	2370.7	2213.02	2558.7	2893.32	3150.37	2365.92	2495.01	3226.03	1473.3	1473.3	1473.3	1473.3	1473.3	1473.3	1473.3	1473.3	1473.3	1473.3	1473.3	1473.3	16252.8	15369.6	15023.1	15526.5	15373.2	15714.1	3781.1	3779.41	3785.84	3791.21	3798.65	3814.74
407		32461.4	32769.5	35767.1	37739.2	33432.7	30260	16096.1	14664.7	15513.7	18382.3	18435.5	18325.7	10963.3	9235.42	17786.7	19146.8	10354.5	8561.9	7981.91	9516.52	15131.8	13561.3	15873.2	13870.9	4582.97	4582.97	4582.97	4582.97	4582.97	4582.97	4582.97	4582.97	4582.97	4582.97	4582.97	4582.97	11831.7	11601.4	11132.6	11775.6	11330.6	10367.8	7424.03	7429.64	7462.35	7475.39	7468.39	7460.84
408		31950.4	32560.8	35600.6	34389.1	34828.4	37296.4	6923.44	7056.1	7240.17	7143.1	7043.71	6650.07	4165.26	10370.7	8945.17	4465.81	4654.7	6228.68	4726.17	4660.85	5688.14	4816.52	4009.23	4314.46	2301.73	2301.73	2301.73	2301.73	2301.73	2301.73	2301.73	2301.73	2301.73	2301.73	2301.73	2301.73	17979.3	17994.8	18746	18595.5	18554	17453.3	7805.28	7832.81	7842.23	7864.29	7874.52	7861.29
409		21819.6	22445	21046.8	22296.4	22860.6	21107.2	28453.8	26883.6	26039	26022.5	25706.1	25549.6	20285.1	22877.3	16289.1	17831.3	25790.7	35707.3	32463.5	23421.5	21726.7	15653	18211.4	21411.2	9426.64	9426.64	9426.64	9426.64	9426.64	9426.64	9426.64	9426.64	9426.64	9426.64	9426.64	9426.64	16847.1	17939.2	19310.3	18330.9	18745.8	19768.9	8519.08	8490.65	8427.29	8410.9	8479.67	8509.65
410		32277	34075.3	33948.2	33511.5	35592.6	34341.6	4961.03	5096.97	5079.37	4793.94	4582.8	4768.8	3209.28	3335.91	2600.66	2678.13	3136.95	1908.33	1739.5	2171.03	2403.64	1874.13	1891.5	2214.15	1412.91	1412.91	1412.91	1412.91	1412.91	1412.91	1412.91	1412.91	1412.91	1412.91	1412.91	1412.91	12305.3	11681.3	12062.3	13252.8	12823.3	13034	11153.7	11121.4	11086	11055.4	11102.8	11152
411		22601.6	21640.1	18637	18462.7	18162.9	19288.5	15542.5	14622.2	15676.6	16201.2	15906.1	15670.1	9182.07	7754.48	7661.97	12320.8	12975.6	9235.76	8094.28	8131.69	9706.66	12666.7	15964.4	11755.4	4239.45	4239.45	4239.45	4239.45	4239.45	4239.45	4239.45	4239.45	4239.45	4239.45	4239.45	4239.45	18921.6	19541.7	20370.4	20523.6	21501.4	20915.5	8022.3	8011.76	8035.41	8054.24	8004.76	8019.24
412		38664.9	38656.5	40739.4	41019.9	40742.9	43346.6	2537.77	2487.2	2611.07	2533.63	2410.91	2565.29	3403.46	2686.58	2421.88	2230.67	2199.99	2290.62	2216.94	2261.58	2436.99	2420.73	2417.61	2544.76	1457.68	1457.68	1457.68	1457.68	1457.68	1457.68	1457.68	1457.68	1457.68	1457.68	1457.68	1457.68	16080.6	16006.8	16259.7	16171.2	15879.5	16364.8	6939.41	6923.91	6917.7	6913.6	6921.98	6931.89
413		46635.5	48028.9	47782.1	47657	50036.5	46384.8	779.158	800.618	811.558	883.65	902.139	852.184	597.305	425.276	486.928	607.629	364.217	299.491	399.748	528.458	450.368	460.452	422.458	471.333	342.219	342.219	342.219	342.219	342.219	342.219	342.219	342.219	342.219	342.219	342.219	342.219	6973.27	6787.08	6739.34	6802.6	6873.03	7208.84	4086.9	4089.6	4072.72	4065.94	4072.52	4072.78
414		35207.1	33061.3	35063.8	40844.1	36272.1	33729.3	173.692	171.051	190.157	177.991	162.277	181.16	203.978	203.58	160.437	140.09	144.221	145.258	132.684	127.94	127.593	113.376	149.282	212.458	151.381	151.381	151.381	151.381	151.381	151.381	151.381	151.381	151.381	151.381	151.381	151.381	11908	12695.5	12222.1	10991	11860.3	12353.7	4998.57	4994.55	4993.96	4990.76	4983.63	4988.35
415		51433.9	47138.4	44720.7	45018.3	41979.9	48623.1	35537.2	34482	33449.4	32663.6	32022.6	31282	21184.8	19833.4	18411.6	25403	28008.8	17067.2	16085.4	21632	20772.8	26581.3	28636.1	18333.2	16192.6	16192.6	16192.6	16192.6	16192.6	16192.6	16192.6	16192.6	16192.6	16192.6	16192.6	16192.6	9259.32	9247.85	9228.94	9250.13	9263.46	9245.77	10028.2	10028.3	10028.6	10028.9	10029.3	10029.6
416		52453.4	51224.7	53690.5	54821.7	48536.8	49480.1	44359.9	45841.1	45785.4	42442.2	46323.7	46499	37089.9	36458.7	38086.4	31843.6	23416.4	36972.1	54322.5	39277.3	35046.5	36245.2	33904.7	42384.8	21715.3	21715.3	21715.3	21715.3	21715.3	21715.3	21715.3	21715.3	21715.3	21715.3	21715.3	21715.3	17865.5	16847.9	16470.7	17241.7	16636.5	17383.7	2844.47	2832.93	2848.17	2862.71	2873.45	2872.2
417		37391.1	35550.6	33762.3	36952.3	37120.4	34423.6	50086.4	49752.7	54336.1	54297.2	53182	58933.7	69397.5	34374.4	20625.2	31831.8	54306.9	39650.7	30486.1	30908.6	31087.1	47591.9	47695.9	23731.7	17620	17620	17620	17620	17620	17620	17620	17620	17620	17620	17620	17620	17504.3	18328.6	17108.9	15417.4	17194.2	18064.1	12702.6	12713.8	12698.9	12711.8	12675.6	12590.9
418		25165.9	25189.3	25115.6	25186.6	25306.1	25297.2	13738.5	13727.8	13719.7	13670.3	13641.3	13672.5	16646.3	16374.2	16625.1	16799.7	16811.3	16737.3	16841.9	16893.3	16893.6	16761.8	16743.7	16827.9	9852.06	9852.06	9852.06	9852.06	9852.06	9852.06	9852.06	9852.06	9852.06	9852.06	9852.06	9852.06	8104.69	8145.55	8227.51	8181.66	8242.87	8413.89	9570.07	9562.99	9561.93	9557.77	9561.9	9551.85
419		37695	38446.6	42114.4	45111.1	42241.7	36456.5	11509	12015.3	12108.1	11486.1	11354.5	13566.7	18279.6	10583.5	7262.19	5455.44	6609.09	6362.66	5504.12	5942.85	7500.77	11678.2	9058.79	11217.2	8146.03	8146.03	8146.03	8146.03	8146.03	8146.03	8146.03	8146.03	8146.03	8146.03	8146.03	8146.03	11421.6	10906.2	10728.5	11639.1	11362.4	10644.4	8559.13	8577.7	8555.88	8562.28	8583.49	8572.16
420		38742.6	43447.8	50658.3	48584.8	47700.6	53334.7	52014.9	43768.5	44986.2	47336.2	48244.7	48106.7	38503.3	45148.2	32554.4	28167.2	35366.4	33369.7	20292.9	16123.1	23195.3	31006	26413.7	28529.9	24800.8	24800.8	24800.8	24800.8	24800.8	24800.8	24800.8	24800.8	24800.8	24800.8	24800.8	24800.8	18807.5	18378.5	19551.2	20545.6	18518	17755.6	2838.49	2846.61	2858.6	2847.18	2836.45	2844.58
421		27473.2	25952.3	26865.7	28268.1	25358	26012.9	10587.5	11519.4	10922.2	8864.99	9830.99	10376.9	5213.73	7726.26	7004.58	8758.06	13124.6	8429.78	4772.81	4470.04	9018.26	8375.75	5216.79	5605.82	3787.4	3787.4	3787.4	3787.4	3787.4	3787.4	3787.4	3787.4	3787.4	3787.4	3787.4	3787.4	16104.5	16713.3	17682.3	16595.8	16991.1	18493.3	6358.62	6359.38	6388.99	6381.97	6349.76	6329.01
422		51511.2	49309.8	46232.9	42409.4	41970.8	50510.8	70823.4	69567.9	69590.3	68594.2	66300.2	70977.8	78068.9	57823.9	46653.1	50945.7	51096.6	54985.8	59320.4	45962	39452.6	50934.7	56066.2	42412.6	21463.8	21463.8	21463.8	21463.8	21463.8	21463.8	21463.8	21463.8	21463.8	21463.8	21463.8	21463.8	14270.9	13520.9	12675.1	13275.5	13397.2	13339.1	8978.08	8970.65	8919.87	8898.29	8955.95	8987.23
423		34679.2	35340.5	38639.9	42076.7	39734.4	33727.3	32183.5	34604.5	34503.6	33393	32978	34166.3	30999.9	23360.3	26283	32603	39664.3	61584.5	49236.8	29581.8	19619.7	18932.4	21230.4	26022.7	27153.6	27153.6	27153.6	27153.6	27153.6	27153.6	27153.6	27153.6	27153.6	27153.6	27153.6	27153.6	19690.9	19734.1	21603.1	21419.2	20828.3	21313.2	8160.11	8180.54	8170.46	8154.51	8175.76	8187.09
424		27132.7	24813.4	23692.5	25584	25051.8	24458.1	22831.1	24417.3	25639.9	24432.7	25025.1	24715.5	12483.5	16381.9	17100.7	10978.6	15707.5	13987.5	13466.5	15333	12152	18203.4	25072.8	27858.7	10515.6	10515.6	10515.6	10515.6	10515.6	10515.6	10515.6	10515.6	10515.6	10515.6	10515.6	10515.6	20642	21179	21466.4	21831	21379.1	20376.5	11161.7	11112.2	11176.8	11303.1	11312.5	11223.5
425		58056.3	58275.3	56019.5	55512.6	56982.5	56068.3	20454.4	21109.7	19548.3	17966.9	17723.8	19715.3	25692.4	23535.6	19459	13252.4	14278.3	19518.5	12522.4	14214.6	20063.3	17349.2	15928.6	16749.1	11171.6	11171.6	11171.6	11171.6	11171.6	11171.6	11171.6	11171.6	11171.6	11171.6	11171.6	11171.6	11039.3	10635.5	10114.5	10744.6	11047.6	11010.1	11068.6	11013.9	10967.3	11031	10979.5	10946.4
426		32785.3	32034.4	31968.6	31639.2	36158.9	43429.8	16274.4	15113.2	15617	15763.7	15464.4	13814	5224.84	7499.55	8123.24	8582.5	10988.7	7837.28	8385.35	11707.5	17660	14703.1	7509.49	7007.25	5030.73	5030.73	5030.73	5030.73	5030.73	5030.73	5030.73	5030.73	5030.73	5030.73	5030.73	5030.73	19605.4	19742.6	20734	20447.3	20552.8	21765.4	9244.63	9228.61	9257.15	9269.67	9272.52	9257.29
427		51716.2	51207.6	44516.8	41738.1	38020	39544.6	34117.4	32281.7	31929.1	34699.4	36145.5	31888.8	19990.6	27825.7	22918.3	24856.2	27169.7	26529.7	20687.7	15443.7	15077.3	19918.8	18631.9	16935.8	10799.8	10799.8	10799.8	10799.8	10799.8	10799.8	10799.8	10799.8	10799.8	10799.8	10799.8	10799.8	10024.1	9505.87	9366.48	10606.7	10270.4	9994.5	12800.2	12725	12737.8	12745.4	12756.8	12699.1
428		40639.2	39322.7	40461.7	42444.3	37459.3	37296	50001	46592	44760.9	45215.9	47381.1	49667.8	25496.8	27209.4	25541.7	23239.5	29942.4	25410.5	27864.2	32093	24805	24828.3	21406.4	22365.3	26689.9	26689.9	26689.9	26689.9	26689.9	26689.9	26689.9	26689.9	26689.9	26689.9	26689.9	26689.9	10605.4	10646.8	10669.6	10447.9	10487	10591.9	7331.82	7335.98	7335.33	7327.71	7326.89	7331.48
429		19654.3	20441.9	19730.3	20053.3	19799	18516.9	5722.64	5567.71	6004.3	6132.6	5762.95	5754.16	4422.3	4180.04	4676.96	4872.21	4381.77	3977.96	3674.7	4223.25	6659.46	7788.64	6484.89	5070.68	2545.07	2545.07	2545.07	2545.07	2545.07	2545.07	2545.07	2545.07	2545.07	2545.07	2545.07	2545.07	20238.4	19925.8	18756	19122.2	19840.4	19205.4	7325.3	7338.39	7322.4	7323.18	7332.12	7327.78
430		31398.8	33078.2	32230.2	33959.2	38873.2	37568.8	8916.7	8337.98	8487.15	8649.7	8127.62	8454.43	6509.51	5926.7	4775.57	4372.14	6038.49	5357.2	4794.13	5208.17	4748.22	5289.01	7194.93	4429.76	2688.18	2688.18	2688.18	2688.18	2688.18	2688.18	2688.18	2688.18	2688.18	2688.18	2688.18	2688.18	22326.3	21836.3	19601.1	21298.9	21926	19953.1	5221.67	5220.89	5204.96	5190.56	5181.89	5215.85
431		29008.2	28560.6	29321.2	30466.4	30109.9	30574	13899.9	13380.2	13693.4	13958.4	13401.9	13161.4	17041.1	15901.2	17595.5	18269.7	17898.2	17811.9	16507.1	15779.6	17584.6	18194.3	17900	19270.4	11187	11187	11187	11187	11187	11187	11187	11187	11187	11187	11187	11187	8170.42	8076.3	8694.91	8959.89	8926.67	8801.48	13455	13456.5	13448.5	13447.1	13429.1	13464.9
432		24528	24528	24528	24528	24528	24528	7392.88	7392.88	7392.88	7392.88	7392.88	7392.88	2756.67	2756.67	2756.67	2756.67	2756.67	2756.67	2756.67	2756.67	2756.67	2756.67	2756.67	2756.67	1921.31	1921.31	1921.31	1921.31	1921.31	1921.31	1921.31	1921.31	1921.31	1921.31	1921.31	1921.31	15267	15644.7	15803.8	15443	15706.4	15477.8	7137.86	7146.76	7152.96	7162.78	7161.12	7151.95
433		54402.3	52848.5	51682.3	52569.3	52732	55009	16324.2	16729.5	17162.5	16072.5	15715.5	16564.9	14928.3	14043.1	19507.7	18172.5	13992.1	12792.6	15038.7	19003.7	16252.6	14028.1	14045.9	14748.8	8708.48	8708.48	8708.48	8708.48	8708.48	8708.48	8708.48	8708.48	8708.48	8708.48	8708.48	8708.48	7662.84	7579.26	7425.67	7483.77	7656.61	7705.48	7936.78	7920.67	7914.51	7932.47	7937.46	7930.64
434		34506.5	34811.4	34802.7	34348.2	34461.8	34697.9	2122.51	2110.37	2119.48	2115.24	2097.65	2105.6	848.202	844.169	855.314	887.514	897.017	930.333	878.816	896.934	889.973	872.015	928.065	941.265	609.308	609.308	609.308	609.308	609.308	609.308	609.308	609.308	609.308	609.308	609.308	609.308	17613.9	17359.8	17175.5	16695.6	17221.1	16722.7	4515.56	4542.61	4550.34	4554.29	4519.92	4518.8
435		40958.5	40689.7	41888.2	39170.2	37047.7	38751.7	16777.6	18163.8	17460.2	15314.2	14939.9	16367.4	8309.76	6514.69	15573.1	19449.9	11371.5	7080.01	6641.31	12299.7	14938	13958.4	11534.9	10731.3	7245.77	7245.77	7245.77	7245.77	7245.77	7245.77	7245.77	7245.77	7245.77	7245.77	7245.77	7245.77	14837	15364.5	15529.2	15443.3	16140	15746.1	3693.92	3679.74	3669.63	3689.24	3699.24	3690.88
436		57329.6	55980	56038.9	64597.1	56634.9	47948.3	24971.8	26841.6	28342.1	27463.8	25124.4	23727.8	13609.8	13185.4	12629.9	15986.5	16570	17760.1	17831.8	13093.8	23295.3	26495.7	13346.9	17142.6	7223.39	7223.39	7223.39	7223.39	7223.39	7223.39	7223.39	7223.39	7223.39	7223.39	7223.39	7223.39	10305.2	10667.4	10045	9181.59	8454.01	8876.63	8266.34	8272.78	8267.1	8294	8284.78	8217.71
437		25737.4	27740.1	30272.8	27593.4	26153	26922	9771.08	10143.1	10883.9	10265.4	9641.97	10129.5	8996.51	8497.99	4991.3	4589.18	5796.42	6048.7	5006.91	4522.75	6225.51	8158.1	7628.01	9892.72	4633.48	4633.48	4633.48	4633.48	4633.48	4633.48	4633.48	4633.48	4633.48	4633.48	4633.48	4633.48	23033.7	23542.4	22828.5	22516.9	21900.4	21272.6	7215.58	7197.88	7240.75	7261.7	7229.85	7234.01
438		34959.9	34641.8	30957.8	29949.9	29991.1	30748.4	16867.3	15925.6	15308.3	16258.6	17093.6	18993.4	24111.7	10449.9	5608.66	5356.65	10502.1	12149.6	8594.62	7058.69	8699.97	13725.5	12893.5	10639.4	6599.96	6599.96	6599.96	6599.96	6599.96	6599.96	6599.96	6599.96	6599.96	6599.96	6599.96	6599.96	6544.61	6698.69	6280.14	6126.39	6392.72	6047.27	12630.9	12681.8	12678.7	12679.4	12735.7	12716.8
439		45885.2	45203.4	55615.4	59374.2	54841	56827	24615.8	25789.6	28594	25939.9	24948.8	26441.5	16289.2	14660.6	13601.5	13399.2	18770.9	20397	18313.7	17866.5	18231.6	15510.1	11772.3	10027	7123.92	7123.92	7123.92	7123.92	7123.92	7123.92	7123.92	7123.92	7123.92	7123.92	7123.92	7123.92	17406.8	17423	18107.8	18420.6	17641.1	16952.8	11065.1	11086.3	11072.4	11097.1	11097.1	11028.6
440		37677.2	38948.5	38330.9	37315.9	38054.2	36023.4	22673.9	21824.7	23499.2	23975.3	24198.9	26227	15855.5	12847.9	19131.5	28516.6	24817.7	11117.1	9814.91	11763.8	13602.2	23472.8	17239.7	10919.8	8493.29	8493.29	8493.29	8493.29	8493.29	8493.29	8493.29	8493.29	8493.29	8493.29	8493.29	8493.29	4822.65	4914.68	4916.73	4801.49	4946.17	5000.93	3539.46	3546.36	3552.68	3542.22	3536.38	3534.97
441		68311.8	66741	64017.8	61283.5	60816.1	65715.4	24248.6	23050.6	23334.8	24222.3	23143.6	23901	27594.6	25059	25430.4	23035	21155.2	23125.9	25421.6	24857	24397.7	24364.9	22483.2	22286.2	14099.2	14099.2	14099.2	14099.2	14099.2	14099.2	14099.2	14099.2	14099.2	14099.2	14099.2	14099.2	15163.9	15935	15386.7	14193.9	14040.3	13770.1	6415.01	6436.22	6461.62	6456.8	6455.32	6427.2
442		20511.1	19816.4	19585.7	19952.7	20260.2	21090.4	3207.97	3198.75	3189.75	3245.74	3263.68	3178.23	1768.95	1889.26	1320.46	1148.72	1463	1688.22	1328.95	1207.47	1334.53	1796.43	2105.4	2091.25	1116.78	1116.78	1116.78	1116.78	1116.78	1116.78	1116.78	1116.78	1116.78	1116.78	1116.78	1116.78	12122.5	12103.6	12011	11999.4	12230.9	12198.4	11579.2	11586.5	11580.6	11578.1	11581.8	11582.5
443		17647.8	17835.6	15871.6	14998.6	17803.7	19954.6	42193.3	38445.1	42215	42343.2	41320	46629.7	43309.3	34088.8	29231.6	18084	22433	37116.6	32270.7	37666.6	39170.2	37605.9	44348.4	31702.7	17956.3	17956.3	17956.3	17956.3	17956.3	17956.3	17956.3	17956.3	17956.3	17956.3	17956.3	17956.3	14511.2	13415.2	13903.8	14184.8	13888.2	15427.2	6826.79	6822.39	6819.2	6817.77	6799.98	6809.79
444		47859.1	49807	50647.1	47739.8	40116.6	41202.4	6560	7044.18	6788.67	6084.16	5869.77	6254.58	6286.64	4447.09	3183.53	3982.37	6712.29	5748.18	3839.49	3077.9	2719.48	4542.94	8043.89	4275.92	1630.51	1630.51	1630.51	1630.51	1630.51	1630.51	1630.51	1630.51	1630.51	1630.51	1630.51	1630.51	13890.6	13964.9	14014.3	14001.6	14082.7	13953.4	11256.1	11257.6	11252.5	11250.5	11252.1	11255.5
445		39758.5	40799.4	38444.5	35362.7	36251.1	36819.4	42404.3	42412	41029.6	42165.9	43220.9	42017.5	18375.3	23912.8	30140.8	30170.9	24024.1	20996.2	22498.7	19107.3	19684	20295.6	19391.3	21568.6	15608.4	15608.4	15608.4	15608.4	15608.4	15608.4	15608.4	15608.4	15608.4	15608.4	15608.4	15608.4	21508.4	21353.8	21318.1	21789.9	21151.5	20389.8	8823.04	8849.48	8857.22	8832.67	8810.41	8819.89
446		27217.3	28381.2	27633.6	26461.9	26538.3	26131.7	31761.5	32023.6	32473.5	31924.6	32369.5	32600.2	15530.5	16111.8	14508.4	14334.3	17722.7	16939.2	15902.4	15568.1	14106.5	15543.7	15289.4	15566.3	10137	10137	10137	10137	10137	10137	10137	10137	10137	10137	10137	10137	15173.2	15057.1	14175.1	13687.3	14408.6	14779.6	12379.5	12407.1	12375.5	12344	12329.1	12378.1
447		27607.3	28572.6	29514.7	27915.9	27987.7	29874.8	845.915	795.431	791.312	837.417	857.729	901.136	1078.8	887.778	864.717	765.095	679.727	655.982	674.627	688.532	603.145	621.851	712.841	630.239	411.6	411.6	411.6	411.6	411.6	411.6	411.6	411.6	411.6	411.6	411.6	411.6	13302.7	13697.7	13837.5	13128.1	13072.3	13236.8	8034.71	8040.74	8038.88	8034.77	8035.52	8041.16
448		28443.7	28830.2	31328.5	31617	33147.6	33840.5	7942.55	8429.1	9107.28	8341.48	7867.35	7872.46	4909.63	5865.27	4717.14	5956.28	7948.42	4676.99	3867.38	4840.53	7114.45	8402.42	7735.61	5618.27	3791.86	3791.86	3791.86	3791.86	3791.86	3791.86	3791.86	3791.86	3791.86	3791.86	3791.86	3791.86	13044.3	13723.1	14565.2	13533	12945.8	12759.7	3550.21	3544	3548.36	3567.52	3584.94	3583.5
449		23780.6	23516.5	26734.4	27170.8	26337.3	30117.4	23115.4	21437.1	21079.6	20699.3	21080	21722	14052.8	14334.8	10422.4	10692.5	16147.3	19388.2	27312.1	21258.4	18157.9	20380.2	19782	13723.7	6553.55	6553.55	6553.55	6553.55	6553.55	6553.55	6553.55	6553.55	6553.55	6553.55	6553.55	6553.55	13855.3	13820.4	13763.7	13458.7	13674.5	14149.3	5120.16	5120.13	5118.22	5118.79	5117.03	5122.19
450		31096.9	32668.1	32869.4	31890.3	32201.9	32411.2	1871.4	1827.92	1841.56	1785.83	1829.31	1864.56	1461.02	1477.5	1732.19	1846.89	1816.9	2222.64	2412.03	1766.61	1616.69	1859.16	1735.33	1344.42	749.949	749.949	749.949	749.949	749.949	749.949	749.949	749.949	749.949	749.949	749.949	749.949	10031.2	9789.95	9279.9	9666.21	10044.3	10289.4	11833.9	11770.8	11717.3	11729.7	11736.3	11735.5
451		58723.7	59065	60062.1	59550.2	58712.7	58829.3	8276.17	8278.09	8321.65	8369.7	8319.23	8263.51	9647.83	9892.11	9763.42	9685.6	9704.81	9614.54	9715.12	9830.82	9776.98	9694.92	9612.93	9645.58	5739.28	5739.28	5739.28	5739.28	5739.28	5739.28	5739.28	5739.28	5739.28	5739.28	5739.28	5739.28	8873.9	8868.73	8835.06	8821.37	8824.47	8842.97	7282.91	7283.01	7282.26	7283.39	7284.23	7282.72
452		44101	44815.4	46723.4	46739.8	44353.7	43321.3	3799.32	3785.43	3587.9	3750.9	3831.56	3652.96	1747.13	1800.5	1540.18	1594.22	1503.87	1636.91	1911.19	1716.32	1618.77	1880.39	1857.59	1736.84	1350.8	1350.8	1350.8	1350.8	1350.8	1350.8	1350.8	1350.8	1350.8	1350.8	1350.8	1350.8	12779.4	13013.6	13024.6	12623.7	12523.5	12526.9	7338.69	7352.31	7338.29	7322.77	7296.69	7276.73
453		48523.6	48560.9	48976	51311.4	50355.2	54530.3	1833.51	1698.71	1525.8	1467.85	1613.35	1488.07	628.105	1010.69	871.761	851.125	1164.18	1372.87	1608.47	1480.22	1094.17	1150.91	1303.12	1295.93	842.583	842.583	842.583	842.583	842.583	842.583	842.583	842.583	842.583	842.583	842.583	842.583	11417.5	11467.8	11988.1	12811.7	12503.3	11427.7	3732.35	3737.04	3748.62	3757.42	3748.65	3748.01
454		44048.8	44366	48615.9	48442.3	44311.1	46869.4	7749.65	7517.51	7499.01	7416.88	7051.12	7135.45	6353.3	6695.6	8406.52	7601.34	6942.09	7165.44	7271.22	5921.68	5361.36	6208.59	5532.82	5222.98	3151.21	3151.21	3151.21	3151.21	3151.21	3151.21	3151.21	3151.21	3151.21	3151.21	3151.21	3151.21	20571.9	21163.9	22284.1	22493.1	21247.2	20108.7	7565.69	7539.36	7540.52	7565.1	7563.58	7567.63
455		53186.3	54176.3	57915.2	57586.4	49530.5	44893.1	3799.14	3930.6	4283.34	4813.87	4360.38	4302.62	4463.95	3719.1	2872.33	3007.75	3673.51	1902.11	2338.82	3393.84	1882.92	1979.13	2732.28	2486.98	1486.81	1486.81	1486.81	1486.81	1486.81	1486.81	1486.81	1486.81	1486.81	1486.81	1486.81	1486.81	15934.7	15790.8	15230.9	15948.9	14876	12745	13823	13968.2	13972.1	13911.5	13893.4	13888.9
456		24417.3	24450.7	24174.4	23997.3	25640.2	27432.4	19590.2	19027.6	19730.2	19763.6	18915.2	18541.9	9293.88	12622.6	11589.3	8957.35	9582.42	9168.33	8891.81	11582.7	11754.1	8292.12	7849.77	9231.81	7179.02	7179.02	7179.02	7179.02	7179.02	7179.02	7179.02	7179.02	7179.02	7179.02	7179.02	7179.02	16248.9	16093.4	15574.4	16482.6	17278.3	16602.1	13097.1	13073	13041	13048.1	13039	13052
457		34764.9	34014.3	35837.5	34929.1	34120.7	38750.6	3676.45	3556.62	3842.39	3822.43	3770.02	3600.78	1585.5	2415.68	2160.22	2213.53	2467.02	1724.44	1633.62	2167.42	1916.76	1517.08	1483.05	1416.26	1040.95	1040.95	1040.95	1040.95	1040.95	1040.95	1040.95	1040.95	1040.95	1040.95	1040.95	1040.95	12496.9	12245.9	11127.3	11523.3	12823.8	12291.9	3387.67	3389.46	3368.46	3360.01	3372.73	3377.67
458		39580.8	41985	43892.8	40598.4	39355.6	42546.5	40079.3	40168.3	43225.4	41574.9	44234.9	40642.7	15690.6	21722.1	21867.3	22071	22017.6	24792.9	23231.6	17918.6	14840.8	23924.9	24613.6	15141.8	11451	11451	11451	11451	11451	11451	11451	11451	11451	11451	11451	11451	18018	18939.3	19121.5	18052.2	17933.4	17631.8	10150.8	10158.7	10129.3	10131	10151.3	10140.6
459		58537.3	58756.7	58736.8	58709.8	58894.5	58557.3	34412.1	34563.7	34606.9	34453.7	34598.7	34626	42371.1	42453.3	42591.2	42880.5	42753.1	42292.8	42411.6	42111	41839.6	42020.9	42235.3	42475.7	25144.1	25144.1	25144.1	25144.1	25144.1	25144.1	25144.1	25144.1	25144.1	25144.1	25144.1	25144.1	7282.46	7275.82	7327.91	7426.63	7389.47	7359.49	13812.5	13794.2	13784	13784.9	13758.8	13776.1
460		45620.4	44925.4	44709.5	44835.2	45503.7	45431.9	28341.4	28175.1	28401.8	28882.3	28566.4	29226.1	32367	31152.3	35232.6	34311.1	34079.1	33640.7	32659.7	31185.1	29461.2	29528.5	29791.3	29462.2	18160.8	18160.8	18160.8	18160.8	18160.8	18160.8	18160.8	18160.8	18160.8	18160.8	18160.8	18160.8	15140.4	15140.7	15157.2	15150.2	15152.2	15150.7	1174.9	1175.01	1174.95	1175.01	1175.01	1174.92
461		52036.5	47063.2	45404.5	45610	39696.3	42465.8	42962.5	40602.2	39226.6	42730.3	47060.2	45646	25119.6	32782.5	38517.1	36460.4	30091.6	26118.4	46421	57440.2	33151.6	45890.1	42376.3	19421.1	12865.1	12865.1	12865.1	12865.1	12865.1	12865.1	12865.1	12865.1	12865.1	12865.1	12865.1	12865.1	7038.43	7026.53	6853.29	6914.35	6331.04	6068.77	4776.6	4749.78	4789.87	4808.63	4755.07	4773.53
462		40761.6	42028.9	44259.5	46624	48192.8	46153.8	1116.14	1100.4	1047.96	1166.27	1177.68	1051.5	842.222	718.327	570.189	529.414	720.398	1015.45	877.02	1206.24	961.125	550.125	581.33	661.977	439.721	439.721	439.721	439.721	439.721	439.721	439.721	439.721	439.721	439.721	439.721	439.721	17687.1	17961.8	19060	20136.4	20966.8	20480.9	7656.08	7610.43	7598.06	7630.47	7629.25	7642.23
463		26688	26513.5	27409.1	29129	27989.7	25398	5053.13	5226.97	5243.49	5523.72	5336.53	4740.73	1697.48	2850.35	3538.89	3077.58	3804.13	2471.63	1891.49	3304.9	4022.5	3085.38	3014.92	1997.11	1551.37	1551.37	1551.37	1551.37	1551.37	1551.37	1551.37	1551.37	1551.37	1551.37	1551.37	1551.37	16324.8	16764.2	17532.7	16811.1	16118.7	16587.4	11700	11727.8	11741.6	11696.2	11674.2	11693.5
464		52222.3	53197.4	48991.1	46495.5	43880.4	44676.2	24635.7	25165.4	25007.8	23649.7	23953.2	23592.8	11421.7	10572.9	13743.8	17398.6	13502.2	14886.1	13182.7	11567.5	12745.7	18384.3	16789.2	13080.7	9563.73	9563.73	9563.73	9563.73	9563.73	9563.73	9563.73	9563.73	9563.73	9563.73	9563.73	9563.73	14466.9	14640.1	15706.7	15805.3	14875.6	14627.6	7914.16	7928.08	7929.27	7926.15	7933.76	7904.86
465		11241.1	10832.8	9297.46	9001.64	10124.5	11709.8	55857.8	52761.5	50214.7	47292.9	46776.6	48957.1	30195.1	20839.1	20423.2	26696.5	33646.5	36722.2	47272.1	40170.2	25379.5	21960.9	18397.3	23219.7	15448.5	15448.5	15448.5	15448.5	15448.5	15448.5	15448.5	15448.5	15448.5	15448.5	15448.5	15448.5	4664.63	4263.41	4090.93	4527.14	4852.91	4868.52	9436.96	9461.54	9418.39	9417.79	9437.93	9437.13
466		49831.2	51750.8	52024.8	45836.3	44408.6	51105.1	21816.1	21885.7	21700.8	21723.9	22547.6	20329.8	15805.3	17890.4	20478	16663	16343.4	17217.7	17466.8	20999.1	20707.6	15981.8	16448.3	20253.3	11405.4	11405.4	11405.4	11405.4	11405.4	11405.4	11405.4	11405.4	11405.4	11405.4	11405.4	11405.4	14426.2	13277.9	10992.9	12431.8	13428.4	13058.7	8940.56	8916.26	8862.83	8839.13	8827.56	8855.98
467		39860.7	40294.9	39049.3	36664.1	36213.1	36397.5	8331.28	8434.37	8710.48	8914.98	9339.44	9093.35	3887.03	4709.78	4496.81	4126	4404.39	4518.63	4479.6	4703.6	7298.65	5781.34	4844.51	6995.58	4632.26	4632.26	4632.26	4632.26	4632.26	4632.26	4632.26	4632.26	4632.26	4632.26	4632.26	4632.26	9334.48	9114.09	8319.86	8669.7	8937.42	8699.69	11489.7	11485.1	11402.4	11414.9	11432.4	11397.2
468		45887.2	44480.6	44766.3	47587.9	43078.5	44419.5	53291.3	48362.5	51646.7	52743.9	49528	51063	49593.2	47181.5	42932.9	44049.6	49839.4	51992.2	58816.7	51897.9	40654.2	35574	38514.4	55524	25682.2	25682.2	25682.2	25682.2	25682.2	25682.2	25682.2	25682.2	25682.2	25682.2	25682.2	25682.2	13992.8	13925.5	14398.3	14832.3	14054.1	13685.9	4315.62	4299.16	4296.59	4323.34	4326.51	4339.13
469		68839.4	70001.6	59540.7	51954.8	50675.2	52690.2	40440.5	41264.9	41151.8	42412.2	43014.2	40934.2	21736.5	21051.8	21398.1	22250	26192.2	20983.2	21484.7	23840.8	19128.1	23178.7	22006.2	22644.1	18073.2	18073.2	18073.2	18073.2	18073.2	18073.2	18073.2	18073.2	18073.2	18073.2	18073.2	18073.2	16024.5	14906.1	14957.5	15415.5	14969	16435.3	8792.68	8766.07	8731.96	8735.71	8822.63	8809.82
470		58089.4	57279.5	53471	52382	54250.3	56890.4	31127	31220.2	29206.1	30706.6	31010.3	26410.7	21083.5	35087.4	29379.4	23156.7	17691.9	16848	18704.7	21895	29521.2	30123	23778.3	20261.1	15435.6	15435.6	15435.6	15435.6	15435.6	15435.6	15435.6	15435.6	15435.6	15435.6	15435.6	15435.6	17511.2	17417.8	16983.7	17508.7	19232.6	17900.2	7723.3	7738.85	7779.19	7812.58	7825.56	7798.12
471		43250.6	45812.2	45422.9	41614.6	40226	43628.4	14129.6	13043.1	13255.5	13706.7	13587	13748.6	11362.3	8916.12	7755.29	12088.7	10374.6	7465.26	7032.35	6969.36	7014.54	8762.89	7100.41	5296.81	4286.07	4286.07	4286.07	4286.07	4286.07	4286.07	4286.07	4286.07	4286.07	4286.07	4286.07	4286.07	12810	12714	11544.7	11229.3	11823.1	12223.5	5342.62	5330	5378.23	5388.68	5374.12	5372.76
472		27487.8	26380	26707.8	27973.4	29343.3	28830.2	12664	12615.1	12371.2	12788.1	12863.3	12365.5	9026.26	9975.75	10608.2	11025.4	8705.27	9422.57	11982.1	15260.2	9577.29	6129.21	10748.1	14678.5	8533.54	8533.54	8533.54	8533.54	8533.54	8533.54	8533.54	8533.54	8533.54	8533.54	8533.54	8533.54	19085.3	18861.9	19677.5	19283.9	18963	20073.3	7737.48	7704.91	7717.7	7766.71	7745.17	7735.65
473		33742.9	36298.5	37062	32651.3	33187.1	33093.5	8728.77	9635.22	10858.6	10104.5	9016.52	8970.06	6450	5323.06	5968.27	6700.7	5984.89	8276.07	7065.22	5525.22	5824.3	6413.09	7211.31	7771.96	3268.65	3268.65	3268.65	3268.65	3268.65	3268.65	3268.65	3268.65	3268.65	3268.65	3268.65	3268.65	15457.8	15633.2	16124.2	16569.7	14908.4	13680.8	10930.9	10920.6	10938.6	10941.8	10936.2	10934.4
474		45031.6	44282.5	43804.7	44951.2	47820.8	47296.4	12175.1	11768.8	11713.2	12503.1	12608.2	12261.4	8004.59	6887.72	4796.24	4502.47	4809.95	5790.41	7307.46	7751.03	6450.12	6442.41	6763.76	6475.58	4455.77	4455.77	4455.77	4455.77	4455.77	4455.77	4455.77	4455.77	4455.77	4455.77	4455.77	4455.77	14134.4	14486	15916	15802.4	15263.4	16065.3	11728.5	11667.1	11690.7	11730.6	11777.1	11725.4
475		49251.4	48031.6	50000.1	50641.2	57355.3	66048.1	14450.8	13054.7	12433.9	12449.5	13277.2	14057.3	12363.4	12162.6	11843.2	14315.3	16092.1	11408.2	10273.3	11627.9	11090.5	11977.6	14801.3	11857	6445.19	6445.19	6445.19	6445.19	6445.19	6445.19	6445.19	6445.19	6445.19	6445.19	6445.19	6445.19	4206.58	4164.15	4253.98	4277.83	4025.45	4126.1	9880.87	9887.38	9888.29	9897.26	9856.42	9819.95
476		23661.2	23661.2	23661.2	23661.2	23661.2	23661.2	35817.5	35817.5	35817.5	35817.5	35817.5	35817.5	13355.7	13355.7	13355.7	13355.7	13355.7	13355.7	13355.7	13355.7	13355.7	13355.7	13355.7	13355.7	9308.49	9308.49	9308.49	9308.49	9308.49	9308.49	9308.49	9308.49	9308.49	9308.49	9308.49	9308.49	12524.8	12515.7	12085.9	12629.7	13722.5	13272.2	8748.18	8755.62	8732.44	8701.19	8709.63	8729.39
477		24122.8	23885.6	24150.5	26291.6	26005.8	25256.1	34545.2	31616.9	30157.3	32526.6	32342.2	31599.9	19983.8	19161.2	19943.9	22620.3	18390	19351.4	22370.7	25095	22827.3	19816	20358.4	23354	20741.3	20741.3	20741.3	20741.3	20741.3	20741.3	20741.3	20741.3	20741.3	20741.3	20741.3	20741.3	10336.1	10580.3	10574.1	10440.3	10596.7	10579.2	14535	14517	14529.6	14525.5	14517.6	14526
478		41985.3	38389.8	34211.2	36217.7	40918.8	43287.2	4070.46	3980.1	3991.35	3723.41	3150.26	3603.29	2829.08	2362.36	2825.21	2964.05	3584.9	3855.89	2994.26	2291.44	1757.63	2224.09	2053.09	1691.73	1334.39	1334.39	1334.39	1334.39	1334.39	1334.39	1334.39	1334.39	1334.39	1334.39	1334.39	1334.39	16630.5	17129.7	16574.6	16289.2	16889.7	15668.9	9270.33	9296.37	9313.8	9375.02	9345.2	9309.74
479		36382.6	37893.3	41048.7	40799	41622.9	38703.5	29804.2	33343.2	37633.7	33299.3	30738.8	34902.3	54006.4	30406.6	18776.7	28390.5	29942	27814.3	32156.9	26419.7	27735.1	24978.4	23725.8	24959.2	15549.5	15549.5	15549.5	15549.5	15549.5	15549.5	15549.5	15549.5	15549.5	15549.5	15549.5	15549.5	10976.9	11253.2	11142.9	10934.6	11845.6	12771.3	9298.92	9274.69	9257.05	9252.45	9265.88	9267.3
480		38211.1	36769.5	38364.3	42463.7	37035.4	32680.2	53600.2	59582.2	52217.3	49541.3	52030	51150.4	34685	36291.1	25195.9	18536.9	34023.7	37021.8	31380.6	43529.8	29316.1	18389.5	28858.2	52005	19399.8	19399.8	19399.8	19399.8	19399.8	19399.8	19399.8	19399.8	19399.8	19399.8	19399.8	19399.8	13576	15188	15718.3	14623.7	14275	12553.9	13235.1	13268.6	13244.6	13275.9	13325.9	13344.2
481		58211.9	53844.4	47654.3	50111.8	49623.9	47546.2	6565.42	6958.54	6995.69	6568.36	5522.56	6020.22	4868.34	5408.39	6945.25	5164.25	4129.58	6185.67	7015.86	3890.74	4046.8	4270.03	5191.36	4886.88	2035.2	2035.2	2035.2	2035.2	2035.2	2035.2	2035.2	2035.2	2035.2	2035.2	2035.2	2035.2	20386.8	20690	20724.8	20510	17750.7	17361.6	4941.33	4929.23	4911.05	4905.02	4886.65	4904.74
482		46229.4	44536.5	39926.2	38264.3	37304.1	37449.8	19154.5	20254.9	19374.2	19046.4	20731.6	20206.1	10379.1	12068.5	22673	16991.2	9875.56	11855.3	11887.5	11054.7	16043.2	18750.5	15365.2	14988.9	7596.34	7596.34	7596.34	7596.34	7596.34	7596.34	7596.34	7596.34	7596.34	7596.34	7596.34	7596.34	18150.4	17502.8	16770.5	16333.4	17857.7	19427.2	12669.6	12624.1	12622.9	12718.2	12802.8	12748
483		61034.1	60045	58315.1	59997.3	54745.5	52564.5	15154.4	16085.1	15319	14193.8	15574.5	15268	10663.9	10969.2	12020.8	13860.7	12828.3	12982.5	10988	11574.8	13238.2	10703.8	16022	14275.6	5678.16	5678.16	5678.16	5678.16	5678.16	5678.16	5678.16	5678.16	5678.16	5678.16	5678.16	5678.16	18292.5	17840.3	17995.1	18816.4	18553.2	18024.8	7252.35	7261.04	7244.52	7250.77	7245.16	7236.63
484		62216.5	62138	62057.5	62105.7	62146.2	62184.4	28187	28192.4	28191.5	28167.6	28190.5	28219.9	33865.8	33728.7	33727.8	33850	33950.7	33917.7	33835.7	33861.9	33989	33829.2	33698.2	33729.7	20028.2	20028.2	20028.2	20028.2	20028.2	20028.2	20028.2	20028.2	20028.2	20028.2	20028.2	20028.2	20395.5	20199.6	20075.4	20155.4	19932	20264.7	9395.08	9389.44	9390.98	9391.06	9394.14	9391.93
485		34461.6	34461.6	34461.6	34461.6	34461.6	34461.6	44848.2	44848.2	44848.2	44848.2	44848.2	44848.2	16723.1	16723.1	16723.1	16723.1	16723.1	16723.1	16723.1	16723.1	16723.1	16723.1	16723.1	16723.1	11655.5	11655.5	11655.5	11655.5	11655.5	11655.5	11655.5	11655.5	11655.5	11655.5	11655.5	11655.5	10519.5	10519.5	10519.5	10519.5	10519.5	10519.5	8201.48	8201.48	8201.48	8201.48	8201.48	8201.48
486		19426.1	19653.7	19624.8	20007.1	20266.3	19400.8	35867.5	36442.3	36379.1	35418.3	34423.8	35366.1	21337.8	17667.4	17117.1	16576.9	15076.2	16958.7	18435.2	16998.7	17695.2	15792.1	13131.2	14274.3	10783.4	10783.4	10783.4	10783.4	10783.4	10783.4	10783.4	10783.4	10783.4	10783.4	10783.4	10783.4	10428.1	10369.9	10570.7	10685.8	10875.1	11107.7	9088.02	9082.18	9064	9074.2	9105.77	9105.66
487		25648.8	25308	24122.4	23323.2	26396	26522.6	29666.5	31241.9	27491.8	27990.9	28643.7	25868.9	18722.5	31734.7	24306.9	24279.5	27686.3	22385.9	13909.6	15637.9	22648.2	28954.6	39926.6	25239.9	11976.7	11976.7	11976.7	11976.7	11976.7	11976.7	11976.7	11976.7	11976.7	11976.7	11976.7	11976.7	14700.8	13770.6	12426	14406.6	14876.3	12377	5428.47	5435.54	5411.93	5442.41	5454.31	5418.25
488		22854.7	22711.9	23810.5	25107.6	23022.8	23957.4	22745	21512.8	21448.3	20289	20454.3	21291.8	19290.4	24634.7	19959.8	13464.6	13928.4	20401	14369.7	19614.5	23714.5	15906.1	16619.8	17085.7	15573.6	15573.6	15573.6	15573.6	15573.6	15573.6	15573.6	15573.6	15573.6	15573.6	15573.6	15573.6	8236.65	7852.47	8302.76	9129.21	8836.01	8404.58	6923.29	6949.2	6964.88	6968.51	6952.79	6943.07
489		24432.7	25027.6	27384	26672.6	26345.8	27615.3	23316.3	23734.6	22915.8	22062.1	21777.4	22986.2	17349.9	11978.3	13114.5	16423.2	13993.2	17514.4	12798.5	10167.4	14142.9	15729.1	14963.7	8274.66	5003.6	5003.6	5003.6	5003.6	5003.6	5003.6	5003.6	5003.6	5003.6	5003.6	5003.6	5003.6	15061.2	15496.3	14121.2	13199.2	13816.9	14205.3	9736.23	9773.96	9787.19	9717.15	9717.95	9707.96
490		49701.5	49834.7	46255.8	44552.6	46735.1	46545.9	6042.18	5954.48	6199.79	6383.88	6409.63	6359.06	6278.83	6133.51	4435.36	4982.36	5080.79	5056.9	5733.02	6330.49	5362.82	5675.89	5556.67	4587.74	3076.28	3076.28	3076.28	3076.28	3076.28	3076.28	3076.28	3076.28	3076.28	3076.28	3076.28	3076.28	10165.2	10483.5	11417.7	11358.4	11479.4	11565.5	10507.1	10517.8	10491.2	10496.9	10514.6	10499.3
491		53696.3	52402.8	49451	48717.4	52396.3	57413.1	1961.2	1882.5	1940.19	1930.02	1906.33	1932.85	2050.69	2037.19	1899.01	1943.25	2201.45	2197.19	1912.47	1839.62	1945.2	2080.68	2026	1955.31	1134.29	1134.29	1134.29	1134.29	1134.29	1134.29	1134.29	1134.29	1134.29	1134.29	1134.29	1134.29	11957.6	11637.2	11745	11712.6	11435.2	10913.7	12704.4	12842.7	12777.3	12774.9	12825	12813
492		15538.6	15376	15894.5	16523.2	15551.2	14655.8	26776.3	28297.8	27626.9	26526.8	26203.8	26922.2	9557.23	8498.04	17618.7	25387.5	12665.8	10906.5	14883	18527.4	14174	10900.7	12966.5	13871.7	8116.02	8116.02	8116.02	8116.02	8116.02	8116.02	8116.02	8116.02	8116.02	8116.02	8116.02	8116.02	13544.5	13569.4	13588.4	13740.4	13804.2	13789.2	2144.83	2143.33	2142.54	2142.72	2142.74	2142.61
493		36422.5	35913.4	34622.1	32978.8	32682.3	33352.1	3164.8	3067.72	2907.01	3098.37	3174.21	3215.12	1928.68	2408.18	2353.66	2322.33	2885.39	1542.62	1790.32	2925.89	2411.78	1294.21	1265.16	2339.06	1459.7	1459.7	1459.7	1459.7	1459.7	1459.7	1459.7	1459.7	1459.7	1459.7	1459.7	1459.7	9604.19	9604.19	9604.19	9604.19	9604.19	9604.19	7684.07	7684.07	7684.07	7684.07	7684.07	7684.07
494		55467.1	58059.3	60516.9	62201	62355.7	54937.1	17341.3	17983.3	18337.2	17810.3	18723.7	20159.2	18644.9	12790.5	14138.6	14736.8	11136.8	16323.4	16030.7	11789.3	17912.7	17533.8	9468.45	10459.6	6864.61	6864.61	6864.61	6864.61	6864.61	6864.61	6864.61	6864.61	6864.61	6864.61	6864.61	6864.61	13973.5	13896.9	13816.2	14745.4	14245.4	13325.3	8796.97	8790.2	8806.68	8793.93	8742.86	8790.29
495		37645.4	39384.1	41298.6	38213.9	38857.4	38326.9	39622.3	38960.2	37301.1	41519.4	44076	41653.7	18091.8	17568.4	28545.1	40528.8	20663.7	18216.2	23414	30546.4	24215.3	16641.6	15484.8	17925.2	14357.6	14357.6	14357.6	14357.6	14357.6	14357.6	14357.6	14357.6	14357.6	14357.6	14357.6	14357.6	14296.3	14827.4	15882.9	15368	14752.7	15333.6	4238.52	4228.34	4229	4223.34	4212.16	4222.64
496		45328.8	46060.4	45275.5	44006.9	44618.6	42763	44735.7	47693.1	45362.3	44067	44964.5	44255.1	36485.3	32929.2	36018.9	43428.6	40712.9	59323.2	62906.9	43014.6	41960.9	45320.9	41563	36223.8	21482.4	21482.4	21482.4	21482.4	21482.4	21482.4	21482.4	21482.4	21482.4	21482.4	21482.4	21482.4	21519.8	21761.6	21245.5	21420.5	21889.4	21270.8	5915.73	5900.94	5906.86	5938.21	5913.35	5887.75
497		54509.6	54587.3	54303.8	54300.9	54681.3	54326.2	4325.28	4342.76	4343	4337.71	4319.26	4318.39	5071.81	5087.58	5136.85	5106.73	5135.96	5123.8	5065.24	5089.9	5146.79	5164.11	5170.12	5125.42	3028.03	3028.03	3028.03	3028.03	3028.03	3028.03	3028.03	3028.03	3028.03	3028.03	3028.03	3028.03	13409.3	13563.2	13244	13437.6	13970.8	13128.9	14713.5	14695.5	14727.2	14792.9	14694.5	14635.3
498		28760.5	28057.9	27511.6	29263.8	32046.9	31170.6	25411.6	26839.8	28278.3	26259.7	25932.2	26143.3	20472.1	21865.5	19388.2	30413	19415.6	14540.9	19550	14477.5	16503.7	14955.3	17180.5	21528	9363.01	9363.01	9363.01	9363.01	9363.01	9363.01	9363.01	9363.01	9363.01	9363.01	9363.01	9363.01	15599.6	15696.6	16120.5	15115.3	14467.1	14433.5	8559.91	8574.2	8630.07	8692.47	8664.1	8644.72
499		35776.4	35776.4	35776.4	35776.4	35776.4	35776.4	18882.2	18882.2	18882.2	18882.2	18882.2	18882.2	7040.81	7040.81	7040.81	7040.81	7040.81	7040.81	7040.81	7040.81	7040.81	7040.81	7040.81	7040.81	4907.23	4907.23	4907.23	4907.23	4907.23	4907.23	4907.23	4907.23	4907.23	4907.23	4907.23	4907.23	9860.06	10665.5	10637.1	10116.8	10929.3	9687.64	3970.02	4005.76	4000.48	3987.73	3995.87	3998.51
500		40817.1	39038.3	37548.1	40413.3	39162.6	38656.9	7267.29	7448.73	7684.56	7372.22	7029.41	6779.89	6409.85	6886.07	8236.06	7758.88	6208.2	6518.74	7197.85	6683.25	6259.43	6331.65	6781.04	7188.25	4564.11	4564.11	4564.11	4564.11	4564.11	4564.11	4564.11	4564.11	4564.11	4564.11	4564.11	4564.11	17674.7	16953.1	15545.7	15829.6	15852.7	15436.8	10302.6	10326.2	10306.2	10313	10327.9	10327.5
501		27047.4	26589.5	26416.5	26662.5	27364.5	27387.5	28180	28347.9	28584	28875	29356.8	28976.1	11773.6	12814.9	13026.5	11883.7	12802.4	12302.7	12189.7	13996.9	13935.2	11973.2	11731.5	12899.1	8681.82	8681.82	8681.82	8681.82	8681.82	8681.82	8681.82	8681.82	8681.82	8681.82	8681.82	8681.82	15466.3	16819.5	18665.5	16768.3	15923.8	16861.5	9910.22	9862.28	9901.42	9931.01	9929.2	9931.39
502		32028.2	32620.1	30541.8	30074.5	31308	30610.5	14670.9	14471	14337	14818.9	14654.2	14473.7	16923.7	16743.2	15204.6	14480.4	14855	16163.2	15639.8	14409.8	14910.1	15903.4	16245.1	16755.6	9525.02	9525.02	9525.02	9525.02	9525.02	9525.02	9525.02	9525.02	9525.02	9525.02	9525.02	9525.02	19021.8	18732.8	20030.3	21419.8	20639.9	20713.8	10864	10836.7	10833.2	10808.9	10829.5	10870.4
503		61894.2	64715.4	66608.2	61694.6	63111.3	64194.5	39727.9	42139.2	43670.3	41384	38228.5	41381	51223.6	42979.8	51082.7	46699.5	24874.7	31970.3	31575.3	32078	30924.6	20492.7	32704.1	37922.3	15816.4	15816.4	15816.4	15816.4	15816.4	15816.4	15816.4	15816.4	15816.4	15816.4	15816.4	15816.4	4719.7	4752.25	4589.28	4523.44	4572.98	4794.73	8247.03	8186	8193.24	8244.44	8202.25	8211.77
504		50436.1	51652.4	49952.6	47997.9	49807.5	56801.6	26500.6	24514.1	26316.7	25325.8	24625.8	26653.7	29476.9	20395.3	24643.5	17770	15665.6	22500.8	17291.7	21216.7	28310.3	22051.3	28868.5	36953	14218.2	14218.2	14218.2	14218.2	14218.2	14218.2	14218.2	14218.2	14218.2	14218.2	14218.2	14218.2	21681.6	21375.3	22090.7	22554.2	21589.3	21436.9	11356.5	11371.9	11305.4	11304.4	11390.7	11340.3
505		47135.2	46445.7	46456.3	47305.9	47769.1	47648.3	19316	19045.1	19189.8	19310.8	19541.6	19793.2	22241.7	22290.4	23069.6	24070.3	22548.4	21930.2	21977.5	21220.1	20970.8	21184.2	21496.5	21588.4	12823.4	12823.4	12823.4	12823.4	12823.4	12823.4	12823.4	12823.4	12823.4	12823.4	12823.4	12823.4	19675.2	20521.8	20575.8	20430.8	22392	21048	3719.66	3722.67	3727.68	3736.09	3719.82	3729.91
506		38442	38622.1	40536.2	40267.8	37320	36460.5	23357.4	24733.9	26375.3	27033.2	29484.9	26999.3	17701.3	18130.1	20226.7	25360.6	23280.7	20078.1	22694.4	22309.1	21671.7	21986.7	24024.3	18021.6	11466.6	11466.6	11466.6	11466.6	11466.6	11466.6	11466.6	11466.6	11466.6	11466.6	11466.6	11466.6	13826.7	14482	15211	14171.7	15114.3	15856.4	14701.9	14737.6	14727.5	14662.1	14610.7	14680.7
507		25074.3	25074.3	25074.3	25074.3	25074.3	25074.3	2032.18	2032.18	2032.18	2032.18	2032.18	2032.18	757.761	757.761	757.761	757.761	757.761	757.761	757.761	757.761	757.761	757.761	757.761	757.761	528.136	528.136	528.136	528.136	528.136	528.136	528.136	528.136	528.136	528.136	528.136	528.136	5050.53	5153.89	4883.63	4611.84	4847.43	5018.97	3741.08	3743.94	3749.64	3742.46	3749.67	3745.58
508		57929.1	58558.8	58573.1	58100.5	57029.5	57753.3	5787.52	5753.43	5730.44	5536.47	5570.63	5723.23	5588.27	5419.38	5274.59	5213.96	4421.55	4806.23	6421.05	5718.08	4846.38	4952.52	5580.26	6636.72	3651.05	3651.05	3651.05	3651.05	3651.05	3651.05	3651.05	3651.05	3651.05	3651.05	3651.05	3651.05	6622.21	6809.41	7265.42	7049.77	6450.52	6397.57	12356.4	12368.7	12361.7	12360.4	12368.6	12360.6
509		29954.7	27275.9	29660.6	36133.5	33957.3	32462.8	35245.8	32723.2	33201.3	37717.9	33769.2	32831.8	33504.3	24745.5	23258.5	26000.1	29703.9	26806	27920.5	23980.6	22368	26323.3	41541.1	59353.5	27096.1	27096.1	27096.1	27096.1	27096.1	27096.1	27096.1	27096.1	27096.1	27096.1	27096.1	27096.1	13613.8	13636.8	13621.8	13622.7	13648	13668.3	16504.6	16501.9	16500.3	16499	16499.8	16501.7
510		40381.3	39231.7	38795.1	41240.7	41537.2	41435.7	32468.7	32117.1	32023.3	30745	30047.5	30528.9	35774	36240.8	25203.8	24422.4	32868.9	39890.1	34227.4	31926.1	30327.3	29273.2	26951.4	29248.7	20734.6	20734.6	20734.6	20734.6	20734.6	20734.6	20734.6	20734.6	20734.6	20734.6	20734.6	20734.6	10604.3	10875.2	11532	10723.2	10660.2	11014.6	9939.29	9979.7	10010.7	10002.5	10024.8	9990.83
511		63754.1	62767.5	56901.1	62065.8	66117.4	60919	24698	25091.2	24273.2	22681.9	22265.9	24099.3	20370.9	14561.9	16227	17647.1	18486.8	16626.6	14226.4	20806.1	24866.9	28967.6	21917	13291.3	8549.62	8549.62	8549.62	8549.62	8549.62	8549.62	8549.62	8549.62	8549.62	8549.62	8549.62	8549.62	18772.8	19205.4	21393.8	20952.2	19976	20669.4	9865.23	9907.87	10010.6	9955.63	9862.17	9900.6
512		39733.7	38277.1	38891.2	37998.3	37930.9	40632.4	7092.93	7683.32	7644.57	6945.29	6776.33	7277.69	6032.37	4356.12	5874.6	5884.66	5648.68	5654.21	3991.16	3843.64	4278.9	7586.98	6886.59	5281.19	3232.72	3232.72	3232.72	3232.72	3232.72	3232.72	3232.72	3232.72	3232.72	3232.72	3232.72	3232.72	15532	16299.3	18348.5	18016.9	17388.6	17489.9	9341.15	9330.97	9325.12	9344.63	9368.04	9318.09
513		51081.2	48106.5	47318.2	50701.9	49868.2	48931	18647.6	18319.1	18834.3	18829	18403.3	18691.2	22161.9	21228.4	17473.4	19720.4	20795.2	19397.9	19180	18890.2	20380.3	24397.4	23088.2	18724.5	10355.9	10355.9	10355.9	10355.9	10355.9	10355.9	10355.9	10355.9	10355.9	10355.9	10355.9	10355.9	20796.7	21196.5	19918.5	19357	21288.3	22790.7	5198.82	5189.91	5196.84	5165.75	5159.4	5164.67
514		40979.7	41237.7	39722.7	40528.2	36979.8	35962.4	37489.8	37665.3	39746.1	37436.5	40199.7	42290.3	29849.6	26091.7	25795.5	23215.7	24845.7	40123.2	34103.5	26323.8	23116.9	19810.7	25379.8	44482.6	17127.2	17127.2	17127.2	17127.2	17127.2	17127.2	17127.2	17127.2	17127.2	17127.2	17127.2	17127.2	7679.97	7237.07	6651.79	7012.97	7119.89	7114.09	6496.71	6489.63	6461.55	6469.41	6514.71	6506.69
515		27840.4	30453.2	33778.8	31189.5	27302.6	25382.1	20537	22557.1	23466.6	22464.8	20939.4	19303.9	16140.4	20864.9	22597.4	22564.9	22557.3	19310.7	17477.9	20522.5	24523.6	25204.8	24045.5	20112.6	14164.1	14164.1	14164.1	14164.1	14164.1	14164.1	14164.1	14164.1	14164.1	14164.1	14164.1	14164.1	13922	12934.8	12638.4	14445.5	13857.4	12679.3	4802.46	4811.86	4828.54	4825.34	4823.77	4825.52
516		28324.3	28257.8	28101.5	27737.6	27934.3	28966.1	115.947	114.747	115.781	114.014	114.109	115.533	46.4426	47.2769	47.9669	43.5306	45.829	54.9707	52.5333	48.8752	49.3281	48.0013	49.4567	50.4682	35.4872	35.4872	35.4872	35.4872	35.4872	35.4872	35.4872	35.4872	35.4872	35.4872	35.4872	35.4872	16427.6	16614.7	18681.6	18225.6	18206.2	19363.7	8185.75	8181.13	8197.98	8199.35	8162.63	8152.98
517		55275.3	53103.4	48504	44510.9	46140.1	53735.1	191.261	178.05	182.194	178.547	167.824	179.766	177.164	242.4	215.843	166.838	152.709	224.935	212.873	147.232	150.285	152.438	140.885	182.519	86.5858	86.5858	86.5858	86.5858	86.5858	86.5858	86.5858	86.5858	86.5858	86.5858	86.5858	86.5858	15070	15230.8	14798.7	14456.5	14154	13989.1	5391.23	5406.91	5416.45	5395.69	5384.63	5396.74
518		55164.5	50694.1	40299.6	40239.9	46309.8	49232.1	6513.96	6650.4	6160.66	6244.12	6831.38	6345.63	2890.63	3660.69	5820.65	5077.8	3456.83	2249.81	3208.36	4522.97	3320.23	3258.26	4582.35	2777.1	1436.12	1436.12	1436.12	1436.12	1436.12	1436.12	1436.12	1436.12	1436.12	1436.12	1436.12	1436.12	10347.5	9558.68	9395.95	10296.6	10499.1	10288.8	9300.96	9310.59	9257.52	9251.63	9229.88	9218.42
519		41188.5	42410.8	44420.1	46209.3	47189.1	44691.5	17326.8	17389.1	16904.3	16296.3	16517	17072.1	13795.4	12876.3	8550.19	9954.69	12789.4	10881.3	12758	11268.7	8551.59	8873.8	15142.9	14165.2	10859.3	10859.3	10859.3	10859.3	10859.3	10859.3	10859.3	10859.3	10859.3	10859.3	10859.3	10859.3	15974.5	15644.3	14502.7	14063.4	14754.5	15198.6	5595.07	5604.13	5628.36	5617.54	5618.16	5642.79
520		22858.5	22556.7	22219.6	22860.9	23307.9	22763.8	1118.55	1114.77	1106.04	1124.99	1121.41	1123.38	553.971	459.244	481.801	466.463	415.628	454.72	490.11	505.163	486.797	484.785	496.919	490.729	336.976	336.976	336.976	336.976	336.976	336.976	336.976	336.976	336.976	336.976	336.976	336.976	9222.01	9741.82	9310.21	8809.93	9307.69	8920.83	10091.2	10117	10084.5	10098.8	10143.6	10126.5
521		45099	44283.3	42003.7	41381.2	39829.8	39412.4	6748.52	6796.94	6572.93	6606.41	6521.64	6655.98	3057.26	2553.11	2712.91	2625.12	3110.28	2639.7	2547.91	3060.67	3352.22	3987.97	4610.01	4288.14	2142.48	2142.48	2142.48	2142.48	2142.48	2142.48	2142.48	2142.48	2142.48	2142.48	2142.48	2142.48	12260	12320.3	11094.9	10341.8	9851.25	10057.3	5744.46	5741.89	5724.09	5732.26	5714.64	5700.5
522		23095.5	23656	24010.6	24290	25210.8	25313.1	513.794	530.28	532.394	481.878	490.771	526.022	393.944	309.175	336.248	289.629	368.074	427.567	375.22	420.242	353.489	317.033	400.9	355.606	201.502	201.502	201.502	201.502	201.502	201.502	201.502	201.502	201.502	201.502	201.502	201.502	5611.15	5775.67	5727.15	5344.49	5418.61	5644.64	8961.3	8954.43	8998.3	9038.48	9060.62	9006.1
523		53980.8	56795.7	55253.9	54891.4	56338	56868.3	36681.5	38417.9	39655.2	37255.5	39486.4	36485.5	27971.5	28893	27394.7	20958.5	19784.9	22837.6	27049.4	24506.1	18511.4	28516.1	38556.3	33400.4	20709.6	20709.6	20709.6	20709.6	20709.6	20709.6	20709.6	20709.6	20709.6	20709.6	20709.6	20709.6	15042.6	14434	14171.2	14156.7	14233.2	15284.8	8390.88	8391.29	8374.22	8370.44	8363.51	8379.3
524		32240.9	32240.9	32240.9	32240.9	32240.9	32240.9	7528.04	7528.04	7528.04	7528.04	7528.04	7528.04	2807.06	2807.06	2807.06	2807.06	2807.06	2807.06	2807.06	2807.06	2807.06	2807.06	2807.06	2807.06	1956.44	1956.44	1956.44	1956.44	1956.44	1956.44	1956.44	1956.44	1956.44	1956.44	1956.44	1956.44	12180.7	12204.7	12497.7	12667.5	12692.2	12991.2	7816.18	7760.1	7756.93	7791.4	7793.93	7818.78
525		36681.4	39266.2	42324.4	39088.5	37635	39351.9	13352	12644.5	12343.1	12526.5	12852	13126.6	7058.12	6346.24	7212.9	8781.07	8237.03	8155.25	5818.53	6216.13	8096.12	6519.81	6849.33	7410.78	5624.54	5624.54	5624.54	5624.54	5624.54	5624.54	5624.54	5624.54	5624.54	5624.54	5624.54	5624.54	21024	21594.7	21970.6	20449.7	20202.5	20513.1	6453.21	6491.73	6512.54	6486	6477.07	6478.85
526		29127	28479.3	26237.1	24995	24463.4	26931.5	33405.6	32283	32535	32969.1	31504.1	31999.5	23148.9	18175	14903.7	12488.2	11412.8	17913.8	31859.7	30755.2	22104.1	16383.4	14148.6	14409.8	9852.11	9852.11	9852.11	9852.11	9852.11	9852.11	9852.11	9852.11	9852.11	9852.11	9852.11	9852.11	9354.78	9711.3	9925.35	9601.66	10271.3	10946.5	8049.66	8027.21	8072	8057.69	8048.94	8070.74
527		70670.6	64233.2	53628.8	60539.4	66496	60302.2	16677	16735.1	15004.3	16011.1	17866.6	16372.3	13262.8	18363.9	13957.2	11456.5	12884.6	11384.8	12807.6	13934.9	11195.2	9202.2	11254.1	13002.8	6500.9	6500.9	6500.9	6500.9	6500.9	6500.9	6500.9	6500.9	6500.9	6500.9	6500.9	6500.9	12276	12417.1	13102.2	12676	11697.7	12526.7	14646.5	14598.5	14651.4	14655.8	14551.4	14566.6
528		36186.3	40767.6	47925	45492.8	43591.6	42282.3	10113.5	9589.25	9772.9	10815.6	10490.3	10124.2	8867.06	9371.91	10559.1	10278.5	10100	7957.25	9766.8	9989.21	8462.01	9509.79	7840.24	8548.21	5299.36	5299.36	5299.36	5299.36	5299.36	5299.36	5299.36	5299.36	5299.36	5299.36	5299.36	5299.36	8668.5	9137.85	8919.61	8161.6	8389.76	8446.91	7544.76	7567.5	7544.74	7541.08	7532.7	7524.47
529		39561.9	39958.3	39685.2	38844.3	39422.8	40035.3	27778.9	28080.1	28043	27511.2	27230.8	27694.9	30128.7	29224.3	30509.4	29972.2	30298.7	30129.2	30871.6	31153.5	29842.1	31029.6	31337.2	30302.6	17756.9	17756.9	17756.9	17756.9	17756.9	17756.9	17756.9	17756.9	17756.9	17756.9	17756.9	17756.9	16722.6	16549.7	16400	16707.2	17303.6	17640.8	13537.3	13484.2	13553.6	13508	13441.9	13526.8
530		43201.6	43566.5	45332.8	46930.5	48122.8	46788.1	35824.6	35077.3	34432.8	35399.8	36024.7	36332.2	19604.1	20330.3	22264.5	18108	18563	24135	21766.4	15216	15004.9	17224.6	15272.4	14262.7	10100.3	10100.3	10100.3	10100.3	10100.3	10100.3	10100.3	10100.3	10100.3	10100.3	10100.3	10100.3	8463.4	7982.96	7538.18	7907.32	9063.41	8838.99	8344.72	8342.3	8391.72	8485.02	8531.89	8497.23
531		48581.2	48030	47088.8	47092.3	49647.4	48989.6	28179.9	29041.4	29122	28928.2	28986.5	28671.7	30967.2	32004.6	30646.1	31091	30133	29996.8	30521.6	30706.6	30578.7	31591.4	33508.2	34764.4	18684.9	18684.9	18684.9	18684.9	18684.9	18684.9	18684.9	18684.9	18684.9	18684.9	18684.9	18684.9	15402.7	15016.8	13990.7	14157.7	14078.8	14114.7	8216.63	8211.89	8228.51	8224.83	8224.89	8210.05
532		46138.2	47770.4	50643.8	47604	45961.6	49962.3	2363.57	2355.69	2330.49	2431.85	2366.28	2215.48	1470.52	1885.51	3162.82	3092.7	3485.28	3202.17	2675.43	1848.46	1991.01	2275.79	1653.39	1990.92	1286.26	1286.26	1286.26	1286.26	1286.26	1286.26	1286.26	1286.26	1286.26	1286.26	1286.26	1286.26	11492.1	12140.6	12298.5	11547.7	11509.8	11359.7	7451.95	7459.81	7464.67	7471.06	7463.94	7460.79
533		48277.3	57480.6	62411.5	54145.6	55299.6	48589.4	23404.9	25460.1	23848.5	24508.8	26538.9	24118.2	13146.6	20386.5	17389.8	16845.2	20211.6	18579.5	19567.5	18446.1	20164.3	26034.8	14978.1	12422.3	12629.2	12629.2	12629.2	12629.2	12629.2	12629.2	12629.2	12629.2	12629.2	12629.2	12629.2	12629.2	10800.2	11614.4	11170.3	10568.5	10993.4	10435.4	2034.58	2047.7	2049.52	2033.68	2027.16	2019.33
534		28339.6	31829	37601.5	33254.7	29823.6	29261.8	52748.2	51512.7	57624.8	63997.6	60676.6	62427.9	50220.3	30724.8	39924.6	48664.4	34844.4	46929.6	64349.8	33007.4	30717.1	41014.1	50669.9	63191	36195.4	36195.4	36195.4	36195.4	36195.4	36195.4	36195.4	36195.4	36195.4	36195.4	36195.4	36195.4	15228.9	15585.9	16615.8	16061.5	15188.7	15382.5	9884.32	9888.55	9866.47	9847.57	9845.75	9898.07
535		58976.5	59010.3	61490.4	60770.7	61636.1	65677.6	15287.2	14996	15603.7	16223	16094	15171.3	11930.2	10468.6	11277.1	16224.7	19324.4	16364.7	13153.2	11233.6	13418.5	14551.4	15934.4	22412.4	9193.8	9193.8	9193.8	9193.8	9193.8	9193.8	9193.8	9193.8	9193.8	9193.8	9193.8	9193.8	9903.33	9374.35	8758.37	9479.36	10324.9	10189.9	11590.2	11553.9	11566.8	11602.9	11575	11550.6
536		48956.6	45984.2	49835.6	56957.4	57260.2	51173.7	50117.5	51868.3	60816.3	62295.3	59773.8	56760.4	35062.1	42161	28751.2	25502.1	41374.9	39477.6	25155.6	51611.3	76298.3	41675	42574.9	39473.3	29163.3	29163.3	29163.3	29163.3	29163.3	29163.3	29163.3	29163.3	29163.3	29163.3	29163.3	29163.3	4239.59	4237.84	4270.36	4370.41	4403.93	4256.16	6621.9	6610.81	6598.25	6610.99	6627.34	6635.04
537		28406.2	28272	27662.4	28422.9	27689.5	27438.3	36132.2	35605.9	34116.5	34118.5	33151.9	32824	32366.4	30719.4	27448.5	28555.9	29135.6	28339	29819.1	33142.8	29466.3	29970.8	40975.5	37967.6	21200.9	21200.9	21200.9	21200.9	21200.9	21200.9	21200.9	21200.9	21200.9	21200.9	21200.9	21200.9	9319.34	9027.89	9136.31	9660.63	9915.6	9783.54	4364.97	4385.22	4393.25	4365.07	4381.6	4384.25
538		18202	18750.3	20072.9	20153.3	21414.1	21019.9	42575.6	44147	43308.4	41860.6	43764.4	41637.9	27904.1	38551.3	40984	32870.1	31759	27307.9	34272.4	70745.5	49878.6	39880	35761.5	31490.9	18912.3	18912.3	18912.3	18912.3	18912.3	18912.3	18912.3	18912.3	18912.3	18912.3	18912.3	18912.3	20565.5	21466.1	22144.6	20685.1	19019	19627.2	7979.06	7964.22	7967.91	7958.79	7963.39	7969.45
539		28404.9	30051.1	31110.8	31699.5	31611.6	29188.2	12612.9	12969.7	13271.9	12318.8	12035.6	12490.8	7507.48	5682.54	4239.1	6804.76	8449.68	7781.84	8171.7	8489.9	8417.21	6640.81	6705.22	5549.6	3100.06	3100.06	3100.06	3100.06	3100.06	3100.06	3100.06	3100.06	3100.06	3100.06	3100.06	3100.06	16024.2	16085	15943.3	15797.4	15726.9	15684.8	9688.69	9699.06	9709.25	9698.94	9685.68	9685.89
540		48047.1	48607.3	50335.5	50911.5	49404.8	48118.2	7119.53	7221.35	7254.66	7264.93	7083.62	7200.06	8066.05	7683.85	7691.4	6742.65	6283.89	6993.36	7848.51	7429.13	6835.08	6796.5	7136.28	8154.42	5063.73	5063.73	5063.73	5063.73	5063.73	5063.73	5063.73	5063.73	5063.73	5063.73	5063.73	5063.73	15584.9	15439.4	15568.4	15977.1	15775.7	15524.2	13228.5	13235.2	13233.3	13232.9	13224.5	13200.3
541		33136.4	32593	31949.5	32140.6	32502.7	32500.3	29056.6	29199.8	28953	29157.8	28884.3	28663.9	32822.9	32850.9	33942.2	33645.8	32278.7	32101	31978.1	31781.1	31549.6	32249.9	34064.6	33875.2	19518.7	19518.7	19518.7	19518.7	19518.7	19518.7	19518.7	19518.7	19518.7	19518.7	19518.7	19518.7	20888.4	21093.3	20960.7	20918.2	21341.9	20804.5	4158.56	4162.08	4163.01	4162.54	4161.36	4160.89
542		55810.5	59595.5	62110.6	58831.1	59671.4	56099	22076.4	23742.4	24006.8	23334.5	23956.8	22883.1	17419.1	15473	16560.5	25847.1	25401	23078.5	25745.1	25325.2	17357.8	13367	18957.1	30013.2	13764.5	13764.5	13764.5	13764.5	13764.5	13764.5	13764.5	13764.5	13764.5	13764.5	13764.5	13764.5	8685.45	8644.1	9312.95	9599.58	9590.53	10206.4	15082.5	14970.1	14919.9	14939	14989	15018.6
543		29883	29607.3	33841.9	34685.6	31935.7	31230.9	2393.76	2480.16	2492.26	2452.16	2433.06	2376.49	1750.95	1784.1	1767.31	2219.39	2386.32	2008.7	2410	2638.67	2597.8	2029.84	1608.08	2077.83	1363.58	1363.58	1363.58	1363.58	1363.58	1363.58	1363.58	1363.58	1363.58	1363.58	1363.58	1363.58	5064.16	5216.13	5673.92	5874.33	5975.62	5538.5	3161.45	3185.88	3176.74	3162.96	3168.66	3171.86
544		57894.8	57202.4	60123.8	59669.7	55701.4	56851.5	15248.5	15612.6	16696.7	16370.5	15290.1	15622.4	15830.6	14915.5	14605.9	14974.8	16500	15241.7	14354	16276	15449.1	14233.8	15530.8	14280.6	8282.15	8282.15	8282.15	8282.15	8282.15	8282.15	8282.15	8282.15	8282.15	8282.15	8282.15	8282.15	18815.9	19555.9	19937.6	20005.1	21365.8	20038	7790.9	7805.91	7802.33	7804.86	7778	7753.65
545		53592.5	56468	55887.4	52242.1	50338.7	54502.4	15346.8	13776.5	14492.6	14921.2	14932.2	14820.4	12755.1	13864.9	15571	15272.6	12444.6	12016.4	13122.2	15054.1	15471.9	14515.4	19031.3	16977	9101.91	9101.91	9101.91	9101.91	9101.91	9101.91	9101.91	9101.91	9101.91	9101.91	9101.91	9101.91	11559.8	11562.8	11366.3	11403.8	11429.1	11240.1	11428.1	11440.1	11449.9	11454.6	11452.4	11440.3
546		49815.1	52375.2	55519.7	56924.1	62927.8	56929.9	38622.8	41354.2	42387.8	40227.8	40628.3	40245.8	33153.5	43181.2	25705.1	14731.6	18224.4	24803.5	23961.4	26346.5	27128.6	23925	26780.7	38815.3	20544	20544	20544	20544	20544	20544	20544	20544	20544	20544	20544	20544	7466.73	7679.49	8180.78	8102.82	8057.14	7639.11	7103.3	7109.7	7095.75	7137.39	7149.59	7141.09
547		36977.5	40233.3	39074.8	33095.9	33484.7	34104.9	19897.6	20510.7	20589.4	21165.6	22041.6	21540.9	10182.4	11398.9	15930.7	16408.9	15662.3	12544.2	10511	11157.9	12711	11456.3	10977.7	15573	11244.2	11244.2	11244.2	11244.2	11244.2	11244.2	11244.2	11244.2	11244.2	11244.2	11244.2	11244.2	16424.3	17590.6	18633.2	16391.3	16320.1	17310.9	14119.1	14169	14143.5	14114.6	14071.2	13999.6
548		34087.5	39355.6	39818.9	36052.3	37768.4	33626.8	23511.9	24556.3	23868	21344.4	23101.3	25196.2	15042.5	14343	14769.2	13586.5	16763.8	21794.3	20381.8	26175.7	25021.9	16755.5	12732.1	13875.9	9999.18	9999.18	9999.18	9999.18	9999.18	9999.18	9999.18	9999.18	9999.18	9999.18	9999.18	9999.18	8842.46	8878.71	8890.91	8896.24	8836.58	8794.47	9294.42	9291.65	9293.14	9296.32	9292.17	9286.36
549		40113.2	40750.8	45743.1	48925.4	43806	38466.4	56053.6	61612.9	52355.9	52107	55254.3	52241.4	48883.7	48728.3	43463.6	55224.7	35807.2	31584	42064.2	44874.5	35736.5	40837.9	41781.6	36938	22882.5	22882.5	22882.5	22882.5	22882.5	22882.5	22882.5	22882.5	22882.5	22882.5	22882.5	22882.5	14145.1	14328.4	14579.9	14838.2	15441	13810.7	6532.11	6555.07	6580.65	6622.32	6602.53	6596.86
550		32775.5	34424.3	34236.6	32617.1	34434.9	33573.9	44737.5	46146.1	45868.4	45121.8	43678.9	43169.6	19988.1	20423.2	23237.3	29315.6	28962.1	25618.2	24972.3	24373.2	21342	23323	25891.7	27801.9	14958.4	14958.4	14958.4	14958.4	14958.4	14958.4	14958.4	14958.4	14958.4	14958.4	14958.4	14958.4	15364.5	16329.7	17046.4	15957.3	15834.5	16898.4	8807.7	8796.08	8818.31	8778.12	8799.25	8808.45
551		37846.6	41034	40419.5	36425.2	38133.8	40296	880.982	784.191	767.953	845.474	883.73	851.652	405.378	788.875	623.155	487.366	730.13	450.092	471.185	649.431	715.964	659.239	668.039	601.334	425.018	425.018	425.018	425.018	425.018	425.018	425.018	425.018	425.018	425.018	425.018	425.018	11062.4	11288.9	11382.5	10763.1	10334.5	11209.9	4403.06	4368.76	4358.24	4390.93	4413.33	4423.2
552		24404.9	26875.4	25943.8	23865.9	25947.6	25693.7	16027.4	16613.5	15417.4	14481.5	13833.3	14647.7	15289	12200.9	7410.76	7928.81	13534.6	16837.4	11353.8	8083.5	10712.7	10761	7860.74	8219.98	4818.15	4818.15	4818.15	4818.15	4818.15	4818.15	4818.15	4818.15	4818.15	4818.15	4818.15	4818.15	19949.1	20012.9	20181.2	20519.4	20627.9	20317.2	10631.1	10621.2	10621.3	10645.4	10641.3	10617.1
553		43470.1	44011.9	46440.3	48141.9	45623.6	43093.6	3653.52	3562.65	3718.03	3957.09	4108.13	3884.77	2559.08	2956.59	3049.93	2950.02	4128.21	3592.67	2587.55	2570.18	2871.31	3778.65	4719.82	3312.17	2086.42	2086.42	2086.42	2086.42	2086.42	2086.42	2086.42	2086.42	2086.42	2086.42	2086.42	2086.42	14623.3	14475.9	13823.4	13574.3	13016.4	12911.4	12105.8	12114.3	12128.3	12128.3	12121.1	12100
554		46993.9	47464.9	47632.8	47254.9	47834.8	48084	7604.19	7505.26	7477.48	7559.84	7548.77	7500.83	9613.59	9375.33	9533.53	9894.47	9751.7	9666.81	9675.03	9565.49	9495.77	9612.73	9664.39	9752.4	5710.08	5710.08	5710.08	5710.08	5710.08	5710.08	5710.08	5710.08	5710.08	5710.08	5710.08	5710.08	11330.9	11286.2	11235.6	11321.4	11599.1	11586.5	14928.5	14909.8	14945.8	14961.8	14961.2	15001.5
555		31047.1	33423.1	27412.9	24611.4	27623.5	27451.6	17808.5	16424.1	16638.7	17872.7	17684.1	17310.1	7982.07	9445.68	18776.2	19213.6	10191.8	5558.36	6846.44	9400.24	8224.27	8604.19	7840.53	10494.9	10006.6	10006.6	10006.6	10006.6	10006.6	10006.6	10006.6	10006.6	10006.6	10006.6	10006.6	10006.6	18561.8	19069.6	20669.2	20258.7	19348.1	19830.9	12717.3	12707.3	12679.1	12680.2	12717.7	12689.4
556		41075.7	43794.3	47733	46498.6	46420.2	46596.6	11285.4	10858.5	10932.2	10443.4	9343.66	10682.3	9900.11	12890.8	16233.2	7525.25	6931.58	7097.41	8184.32	9309.8	5775.82	6390.01	8032.54	6244.88	5013.08	5013.08	5013.08	5013.08	5013.08	5013.08	5013.08	5013.08	5013.08	5013.08	5013.08	5013.08	10170.8	10691	11290	10615.6	10543.1	10653.4	7502.4	7511.59	7508.29	7498.5	7497.3	7500.95
557		18890.6	18485.9	17335.8	17919.1	17914.8	17293.7	24480.3	24700.6	25815.9	25265.2	23909.1	23958.6	25907.3	24313.9	18288	17001.3	16326	19016.9	18194.5	16014.2	19283.7	24937.9	23221.5	12751.5	6624.03	6624.03	6624.03	6624.03	6624.03	6624.03	6624.03	6624.03	6624.03	6624.03	6624.03	6624.03	10283.4	11106.9	11304.5	10167.6	9991.44	10397.5	6849.48	6852.48	6863.68	6829.3	6837.15	6864.8
558		39802.5	38794.8	44950.1	47704.5	43637.8	45538.5	39792	36928.6	37471.5	39519.3	39280.2	40918.6	37349.2	30200.2	31129.1	46403.8	67265.6	48716.7	34552.4	33992	30612	30096	40693.8	36896.3	21822.7	21822.7	21822.7	21822.7	21822.7	21822.7	21822.7	21822.7	21822.7	21822.7	21822.7	21822.7	5389.61	5378.42	5346.66	5288.95	5379.18	5459.65	11729.2	11730.4	11721.8	11724.1	11731	11726.6
559		32060.3	31607.2	32289	31309.2	30579	34048.3	17872.2	18291.4	19463.1	17578.5	16659.5	17829.1	17872.3	13479.3	14323.5	15808.9	15470.6	20028.6	16646.9	10955.7	12210.4	15996.7	17220.7	15627.5	9833.25	9833.25	9833.25	9833.25	9833.25	9833.25	9833.25	9833.25	9833.25	9833.25	9833.25	9833.25	10834.6	11236.6	12230.5	11625.2	10841.4	11534.4	10569.7	10573.2	10578.7	10557.5	10557.7	10593.6
560		34778.7	34713.3	35869.5	36568.4	37597.4	37320.9	1149.21	1145.2	1117.33	1115.27	1124.54	1135.35	559.813	580.92	549.895	603.028	541.225	459.92	490.046	525.116	522.602	498.521	546.752	632.588	370.469	370.469	370.469	370.469	370.469	370.469	370.469	370.469	370.469	370.469	370.469	370.469	16004.1	16705.1	17453.9	17160.6	16803.3	16456.7	14945.1	14974.4	14889.7	14879.6	14885.6	14886.1
561		30034.8	31238	35007.4	35369.7	34715.9	33913.1	27203.8	27712.8	26821.7	27093.7	26854.2	25831.6	22270.2	31968.7	23658.9	22539.1	17724.5	13694.4	13403.8	12391.3	18213.3	17683.8	13404.7	14486.6	11582.7	11582.7	11582.7	11582.7	11582.7	11582.7	11582.7	11582.7	11582.7	11582.7	11582.7	11582.7	14787.2	15529.4	15406.8	14968	15372.2	15251.6	4159.78	4160.54	4154.16	4156.27	4138.39	4138.74
562		38080.8	38375.3	39121.5	39604.8	39102.7	38390.7	9487.33	9488.06	9462.77	9409.82	9352.03	9385.63	9760.54	9443.38	9439.37	10061.8	10156.8	10132.7	10138.8	10125.7	11337.8	10277.1	9394.44	10475	6332.97	6332.97	6332.97	6332.97	6332.97	6332.97	6332.97	6332.97	6332.97	6332.97	6332.97	6332.97	20107.1	20193.9	20222.1	20108.7	20118.5	20242.2	13495	13485.6	13484.1	13489.2	13487	13493.4
563		36373.6	36895.8	37244.5	36647.1	36466.5	36694.8	25540.7	25680.4	25562.7	25417	25038.7	25091.2	10978.5	10428.9	12792.3	12251	12517.7	13753.7	12804.4	11201.6	9605.55	10408.6	13983.3	14069.9	7860.82	7860.82	7860.82	7860.82	7860.82	7860.82	7860.82	7860.82	7860.82	7860.82	7860.82	7860.82	8262.62	8207.11	8052.03	8109.66	8439.53	8403.3	12566.9	12620.2	12617.3	12525.6	12512.4	12535.9
564		40391.1	36869.7	31722.6	34158.7	36101.5	35454.9	1590.9	1562.58	1481.47	1444.37	1483.29	1478.86	1038.01	1108.93	1139.28	1565.62	892.533	675.927	793.815	1026.64	1168.5	1050.44	708.008	706.072	656.375	656.375	656.375	656.375	656.375	656.375	656.375	656.375	656.375	656.375	656.375	656.375	12218.5	12188.6	12219.6	12473.5	11960.3	11942.9	5634.46	5628.91	5618.26	5596.99	5609.14	5640.02
565		36847.1	37269.8	42813.2	40409.8	35047.4	37381.5	409.945	409.034	434.278	477.95	443.045	436.909	370.329	293.734	295.502	256.531	303.329	280.485	209.856	260.203	420.857	335.409	340.226	449.3	175.456	175.456	175.456	175.456	175.456	175.456	175.456	175.456	175.456	175.456	175.456	175.456	15075.3	15556.4	16986	16637.2	15676.8	15079.5	8857.83	8879.73	8865.17	8883.6	8865.42	8844.58
566		64316.5	62011.5	63984.6	64868.7	62150.6	68644.2	5918.07	5665.85	5243.8	5231.16	5454.29	5428.36	5181.45	6677.08	6266.89	4457.07	4053.78	4426.4	4281.24	4267.12	3898.24	3775.59	4459.98	4734.17	2709.62	2709.62	2709.62	2709.62	2709.62	2709.62	2709.62	2709.62	2709.62	2709.62	2709.62	2709.62	9445.05	9540.96	9787.64	9744.11	9803.02	9803.04	10455.2	10452.8	10448.1	10458.4	10453.5	10447.1
567		53774.5	53644.8	54846	55453	53665.8	53777.1	10786.3	10645	10865.8	10935	10806.7	10800.4	12354.7	13037.1	13489.5	12655.3	12400.4	12421	12226.1	12215.4	12601.9	12788.6	12717.7	12850.4	7686.45	7686.45	7686.45	7686.45	7686.45	7686.45	7686.45	7686.45	7686.45	7686.45	7686.45	7686.45	16303.4	16561	14726	13957.1	15743.5	16167.1	2317.9	2320.08	2318.6	2313.71	2322.39	2325.74
568		51442.2	53690.6	51408.2	49544.8	56798.8	52621	27103.7	29803.6	28246	28016.2	29973.1	30162.2	20901.5	18997.2	26044.8	24318.1	25909.7	32233.4	33655.2	32360.6	26102.9	21881.6	17135.4	19110.2	13093.6	13093.6	13093.6	13093.6	13093.6	13093.6	13093.6	13093.6	13093.6	13093.6	13093.6	13093.6	17791.6	17096.9	17374.7	18648.7	18915.8	18152.7	13383	13373.5	13397.8	13424.3	13429.3	13421.4
569		37075.5	34692.1	33895.6	37389.8	37547.5	37317.9	47248.7	49679.5	48277.7	45398.5	46140.6	46614.7	27663.4	18346.2	22726.2	32051.3	26735.1	25529.3	22067	24571.8	28101.1	16410.5	19318.6	26681.6	12747.5	12747.5	12747.5	12747.5	12747.5	12747.5	12747.5	12747.5	12747.5	12747.5	12747.5	12747.5	12009.1	12044.8	12049	11919.3	11846.9	11990.3	3381.11	3379.31	3381.02	3381.11	3376.56	3378.12
570		48757.9	49198.7	48727.3	50589.1	54170.8	50131.6	3776.31	3673.33	3768.48	3962.87	3940.09	4044.32	3473.42	3412.21	3852.63	5250.13	4635.57	2468.8	3315.39	3663.62	2851.25	3389.97	4391.12	5651	3223.17	3223.17	3223.17	3223.17	3223.17	3223.17	3223.17	3223.17	3223.17	3223.17	3223.17	3223.17	16613.3	16558.2	17486	18395.2	17563	16407.1	2594.29	2604.42	2601.98	2585.37	2583.26	2587.13
571		47391.8	49560.7	50495.6	45526.7	50277.7	46982.2	169.69	191.706	186.805	194.464	213.899	213.805	184.122	150.633	108.179	57.1151	66.7	94.7884	94.5385	127.04	164.402	152.314	137.119	110.654	110.965	110.965	110.965	110.965	110.965	110.965	110.965	110.965	110.965	110.965	110.965	110.965	12705.2	12575.4	13757.7	14423.4	13321	12662.3	3754.66	3759.71	3756.89	3768.01	3771.87	3753.45
572		31914.7	34305.5	31426.6	29703.2	31009.8	30331.9	977.858	978.962	902.987	860.279	977.792	990.407	658.257	891.552	552.359	301.855	574.399	684.566	662.385	768.475	669.518	779.892	889.087	688.121	445.166	445.166	445.166	445.166	445.166	445.166	445.166	445.166	445.166	445.166	445.166	445.166	15119.3	14597.2	14287.1	15448.1	15463.4	13197.8	13656	13755.9	13864.4	13831.5	13733.7	13744.9
573		32282.5	30600.8	30952.2	33779.3	31283.8	30518.8	2656.1	2616.01	2649.96	2637.54	2700.72	2784.23	3014.77	2928.22	2833.11	2641.04	2647.89	2623.89	2279.77	2322.03	2789.76	2688.19	2476.94	2874.36	1599.58	1599.58	1599.58	1599.58	1599.58	1599.58	1599.58	1599.58	1599.58	1599.58	1599.58	1599.58	10845.4	10805.3	10778.4	10797.9	10744.2	10653.3	5780.79	5786.83	5789.51	5786.5	5781.84	5780.43
574		42145.8	43863.7	44607.3	41083.2	40767.4	40766	3598.1	3503.21	3465.9	3796.69	3637.82	3695.72	2774.28	2288.01	2083.59	2106.79	2973.95	3301.5	2477.2	1566.61	1096.9	2307.36	3737.42	2126.01	1482.94	1482.94	1482.94	1482.94	1482.94	1482.94	1482.94	1482.94	1482.94	1482.94	1482.94	1482.94	11406.2	11142	12063.7	12736.5	11448.1	11133.8	13795.8	13767.3	13688.8	13735.2	13735.9	13711.7
575		41645.2	39923.8	40879	42523	44600.4	45782	45308.3	45631.9	41928.5	37433.4	37413.2	41631.2	30084.5	28379.5	17714.1	18386.2	23572.9	21982	21401.6	20628.8	26985.2	46750.5	58393	30154.5	17921.6	17921.6	17921.6	17921.6	17921.6	17921.6	17921.6	17921.6	17921.6	17921.6	17921.6	17921.6	15102.8	15414.4	16737	15974.6	15401.6	17281.7	6440.48	6416.42	6412.48	6398.28	6404.49	6403.85
576		33198.9	32975.8	34769.4	36256.3	34668.4	32309.7	16220.4	16285.3	16343.9	16596.1	16083.3	16832.7	10035.7	8748.2	7804.76	6454.54	7273.67	8973.31	13737.4	9507.37	10677.6	11317.7	9696.12	10353.3	7965.45	7965.45	7965.45	7965.45	7965.45	7965.45	7965.45	7965.45	7965.45	7965.45	7965.45	7965.45	19215.2	19049.2	18216.6	17183	19085.7	20032.9	6478.53	6527.41	6550.74	6492.16	6465.84	6515.08
577		49919.4	45487.9	45284.9	51403.7	46232	43050.4	68764.4	73689.9	76437	74178.9	74202.6	69147.4	55561	56584.8	31356.6	33981	42672.5	54740.3	48842.9	39756.2	36713	30230.8	30084.4	46263.7	35923.8	35923.8	35923.8	35923.8	35923.8	35923.8	35923.8	35923.8	35923.8	35923.8	35923.8	35923.8	21082.4	21693.8	21984.3	21066.3	21464.3	21676.5	9396.81	9420.05	9435.42	9409.65	9410.28	9432.73
578		27267	25687.9	24482.4	26614.7	28224.2	27385.9	21665.7	24305	25324.1	21739.6	18901.5	19592.9	25113.4	30183.1	19611.7	14812.2	7729.49	9353.32	17794.7	17357.2	15310.1	11103	12470.6	23971.6	12232.8	12232.8	12232.8	12232.8	12232.8	12232.8	12232.8	12232.8	12232.8	12232.8	12232.8	12232.8	8687.1	8539.62	8908.13	9112.61	8719.29	8518.86	9560.04	9558.43	9545.06	9566.16	9568.75	9545.11
579		58220.8	52347.3	45609.1	48657.3	53585.1	60823.9	37785.7	34635	34190.6	36452.5	39227	37388.6	29005.3	27298.2	26512.2	27488.1	31192.7	24238.6	18410.5	20900.6	31790	33757.2	20873.8	15739.8	12150.8	12150.8	12150.8	12150.8	12150.8	12150.8	12150.8	12150.8	12150.8	12150.8	12150.8	12150.8	16039.7	15223.8	14237.3	15283.9	15420.7	14520.3	5465.48	5472.33	5436.01	5448.54	5418.2	5398.17
580		45111.6	42820.8	45179.1	46374.6	42849.6	41135.8	15902.7	17831.6	16621.1	16155.6	16508.7	16988.8	17953.4	22707.9	16132.9	11845	13787	11626.5	10306.5	10817	10998.8	10622.4	15073.4	13211.2	7838.74	7838.74	7838.74	7838.74	7838.74	7838.74	7838.74	7838.74	7838.74	7838.74	7838.74	7838.74	20180.1	20023.6	19978.6	18707.1	17473.1	18752.3	13962.5	13972.1	14059.9	14090.4	14099.3	14117
581		23867.1	25433.2	26477	24227.9	25130.5	27774.6	13157.9	13270.5	13120.1	13006.6	13503.6	11586.1	3836.81	5687.28	9034.47	10251.4	8200.41	9404.01	9865.99	5237.35	5267.35	8377.31	7020.64	7402.77	5475.75	5475.75	5475.75	5475.75	5475.75	5475.75	5475.75	5475.75	5475.75	5475.75	5475.75	5475.75	18168.1	18724.9	20700.2	20953.4	20487.6	18852.8	8568.75	8620.76	8598.83	8561.19	8558.33	8588.88
582		43265.1	42346.4	46067.8	49138.6	45411.2	47322.8	12807.1	11377.7	10801.6	11813.6	11990.6	11581.8	8045.96	10708.3	13773	10218.9	9452.37	8578.93	10036.3	9820.12	9319.61	10595.7	9209.64	9708.63	5928.52	5928.52	5928.52	5928.52	5928.52	5928.52	5928.52	5928.52	5928.52	5928.52	5928.52	5928.52	9622.1	9565.9	9605.39	9594.89	10061	10335	11384.6	11388.9	11420.2	11390.4	11360.5	11343.4
583		59265.5	57822.6	53844.4	52278.2	52097	54465.1	56687	56449.3	56460.7	54766.9	51206.8	48753.2	26627	31226.1	38150	42208.3	44581.4	34648	38134.3	48704.3	45064.5	52340.8	40218.1	28530.9	16833.8	16833.8	16833.8	16833.8	16833.8	16833.8	16833.8	16833.8	16833.8	16833.8	16833.8	16833.8	16500.8	16171.8	16179.5	16028	16451.8	16615.9	4817.61	4831.91	4841.9	4830.91	4854.53	4865.94
584		23507.8	21138.2	24193.7	30600.7	28842	31015.4	1687.96	1405.98	1451.14	1484.9	1386.79	1532.69	1142.13	1339.85	1815.25	1166.53	927.261	949.93	1035.83	1408.68	1439.69	995.186	1421.38	1585.47	795.256	795.256	795.256	795.256	795.256	795.256	795.256	795.256	795.256	795.256	795.256	795.256	11826.6	11365.5	10839.9	11414.1	11262.9	10588.1	9048.75	9043.42	9010.2	9028.44	8998.63	8992.39
585		54963.4	54497.9	54768.3	56514.5	52001.8	50976.2	27244.4	26904.2	27386.2	27007	27894.2	26831.3	14430.2	22689.3	20258	15565.5	12308.5	15135.4	20049.8	16450.6	17192.2	20511.3	14032.7	14062.5	12183.5	12183.5	12183.5	12183.5	12183.5	12183.5	12183.5	12183.5	12183.5	12183.5	12183.5	12183.5	16642	16631.5	16706.9	16142.8	16558.3	16830.3	9456.38	9488.09	9501.9	9496.54	9515.23	9480.85
586		37061.6	35034.4	34248.8	37578.2	35746.1	34836.3	13025.8	13413.2	13707.1	12773.2	12329.2	12657.6	6730.2	7611.92	8975.79	6562.01	7041.27	8759.48	6700.64	5788.11	5753.43	5821.83	6439.67	7355.74	4993.76	4993.76	4993.76	4993.76	4993.76	4993.76	4993.76	4993.76	4993.76	4993.76	4993.76	4993.76	20396.8	20091.7	20471.4	20827.3	19740.8	18530.3	9293.7	9331.02	9344.87	9357.53	9345.98	9337.01
587		33501.7	37408.7	37550.7	34806.9	38762.2	38743	65662.8	65777.6	65131.6	59627.8	60600.8	58609.4	42120.7	68248.4	47086.3	39541.1	47814.2	46298.7	40224.4	42595	79024.3	100543	44520.3	33552.3	30277.3	30277.3	30277.3	30277.3	30277.3	30277.3	30277.3	30277.3	30277.3	30277.3	30277.3	30277.3	19458	18350.3	17560.3	18302.4	16933.5	18992.7	13348.5	13268	13216.2	13240.3	13280	13206.5
588		33232.9	32994.7	40365.3	46886	47656.1	42429.7	258.504	272.293	270.72	262.726	276.275	285.372	215.425	183.162	134.046	167.948	158.335	120.821	166.598	222.505	207.741	194.828	232.13	188.389	125.235	125.235	125.235	125.235	125.235	125.235	125.235	125.235	125.235	125.235	125.235	125.235	15472.1	16000.7	17727.8	16574.5	15471.9	16672.4	7693.72	7687.89	7678.19	7692.26	7674.39	7657.95
589		37295.5	37955.3	36083.5	33170.5	34412.5	36652.7	14299.8	14459.1	14318.4	13701.5	14171.5	14998.1	13181.2	10852.5	8620.76	8753.33	13179	14463.3	15283.2	15590.6	11844.6	13282.8	20770.7	16702.7	5538.56	5538.56	5538.56	5538.56	5538.56	5538.56	5538.56	5538.56	5538.56	5538.56	5538.56	5538.56	10976	11575.9	13052	12090	11181.4	12576.6	10547.1	10504.2	10416.4	10397.4	10462.2	10440.4
590		18417.3	19770.4	18755.5	17988	19568.6	19418.2	52609.6	51584.1	52084	49683.6	48340.4	48576.5	43222.4	47446.3	24705.2	18796.1	29008.7	50074.5	31807.5	23189.8	22945.7	25859.3	32075.6	33034.5	17877.6	17877.6	17877.6	17877.6	17877.6	17877.6	17877.6	17877.6	17877.6	17877.6	17877.6	17877.6	9343.28	9868.19	10587.3	9960.09	10503.1	10814.5	12262.7	12276.5	12262.6	12257.7	12308.1	12318.5
591		33524.4	32802.4	32161.6	34103.8	34913.4	32686.1	37091.3	38242.2	37113.9	37433.6	36385.6	34984.9	17970.5	28347.9	26804.3	24772.9	22360.9	15470.9	16057.7	18582.3	18616.9	20466.4	24761.1	25475	14794.5	14794.5	14794.5	14794.5	14794.5	14794.5	14794.5	14794.5	14794.5	14794.5	14794.5	14794.5	11059.2	11025.5	10905.3	10771.1	10835.5	10848.7	10928.6	10945.7	10942.8	10933.3	10936.7	10949.2
592		33281.8	33642	32280	33588.1	34605.4	32656.3	37766.3	35837.9	35641.7	36694.8	34508.5	34629.9	20026.5	20041.7	17707.2	22301.5	25151.7	23035.3	22190.6	22464.1	16404.9	19699.8	21374.7	14951.7	9968.72	9968.72	9968.72	9968.72	9968.72	9968.72	9968.72	9968.72	9968.72	9968.72	9968.72	9968.72	17779.5	18450	17354.4	16322.7	17878.3	18470.4	4881.54	4866	4851.59	4863.22	4882.63	4881.49
593		43592.6	41907.1	45594.5	50425.5	55834.9	57615	20525.4	20107.5	22542.2	21695.4	20277.8	21186.7	17653.6	14355.5	10524.6	15383.2	21349	11167.7	9590.52	15966.8	20977.4	16226.4	11781.4	15111.8	9931.28	9931.28	9931.28	9931.28	9931.28	9931.28	9931.28	9931.28	9931.28	9931.28	9931.28	9931.28	5330.86	5324.74	5332.63	5494.17	5652.26	5232.35	9656.38	9703.96	9717.08	9703.65	9698.38	9678.81
594		34657.4	34692.9	34675.1	34653	35679.4	36825.5	28804.4	28429.6	28872.6	28805.2	28251.8	27931.4	30520.4	30224.6	29878.2	32166.9	35229.9	32392	31431.8	31876.3	32925.2	30261.9	29279	31196.3	18949.7	18949.7	18949.7	18949.7	18949.7	18949.7	18949.7	18949.7	18949.7	18949.7	18949.7	18949.7	10340.3	10289.3	11151.9	11293	10902.2	11362.3	10058.4	10029	10054.9	10051.1	10070.7	10104.7
595		44452.7	42254.4	39169	41999.5	43290.5	40783.2	8891.16	9510.61	9901.48	9350.42	8690.79	8032.59	5558.51	9064.41	8993.13	7407.66	7538.5	9511.04	11068.6	10084.8	9956.31	7410.4	9138.38	10590.6	3941.72	3941.72	3941.72	3941.72	3941.72	3941.72	3941.72	3941.72	3941.72	3941.72	3941.72	3941.72	17510.8	17614.8	17565.7	17329.9	17622.4	18202.2	8683.65	8644.25	8600.81	8606.92	8693.61	8702.99
596		48812.5	51232.6	55589.3	59006.9	59299.5	57066.6	20353.6	19771.7	19186.6	18851.1	19376.4	19440.7	15336	11231.1	7716.29	10006.3	15172	16310	11925.8	9981.11	13273.7	16036.5	15351.4	15060.2	5917.79	5917.79	5917.79	5917.79	5917.79	5917.79	5917.79	5917.79	5917.79	5917.79	5917.79	5917.79	19397.2	19276.1	21251.8	21679.1	19603	19366.5	7933.15	7943.89	7931.86	7926.56	7940.57	7974.15
597		16523.3	16510.1	16437	16170.4	15837.4	15770	37451.7	37458.5	37597.5	37089.7	36385.6	37514.9	16893	14601.1	14829.3	19442.6	19319	15258.9	18928.5	22615.3	17601.6	17395.2	19150.2	19424.9	10840.5	10840.5	10840.5	10840.5	10840.5	10840.5	10840.5	10840.5	10840.5	10840.5	10840.5	10840.5	21899.8	21338.8	21872.7	20833.1	19401.9	21494.2	7025.88	7017.69	7038.13	7032.01	7053.81	7051.91
598		62739.5	62938.7	63018.4	62816.8	62906.2	63028.8	47769.9	47677.3	47647.7	47721.8	47715.7	47692.7	56267.3	56084.1	56473.5	56862.1	56462.7	56497.5	56585.4	56311.1	56159.5	56107.8	56272.9	56179.9	33467.5	33467.5	33467.5	33467.5	33467.5	33467.5	33467.5	33467.5	33467.5	33467.5	33467.5	33467.5	19834.8	19626.6	20351.9	20732.5	19361	19591.8	11166.5	11142.9	11160.4	11162.1	11160.8	11181.9
599		41697.2	43380.2	44242.7	41951.8	42053.1	42799.7	14189.6	14326.2	14139.5	14144	14363.2	14124.3	6995.82	6783.03	6555.21	7671.59	7087.58	6241.41	8477.02	8661.22	6211.64	6061.09	7110.38	7796.3	4670.96	4670.96	4670.96	4670.96	4670.96	4670.96	4670.96	4670.96	4670.96	4670.96	4670.96	4670.96	9942.79	10070.1	10597.3	10632.8	10382.9	10515.6	9672.26	9647.45	9642.58	9671.97	9680.4	9675.37
600		41110.9	41040.7	41062.8	40431	38592.7	39302.6	28418.9	28572.8	28887.7	28876.8	29092.1	29125.6	37642	37130.8	36897.4	36957.5	36424.3	36150.6	36818.6	36694.2	36212.7	37215.6	37674.8	37424.1	21845.1	21845.1	21845.1	21845.1	21845.1	21845.1	21845.1	21845.1	21845.1	21845.1	21845.1	21845.1	4000.85	3915.79	3832.39	3896.84	3894.32	3843.33	6962.65	6973.1	6968.61	6960.04	6960.4	6962.61
601		29367.6	29201.8	27798.1	27653.8	29483.1	28431.6	10430.4	10204.8	10264.8	10802.1	11189	11053.9	5801.08	6915.76	8015.11	5615.45	4989.39	6842.55	6453.82	4893.43	4204.63	5408.1	7816.06	10531.1	6233.93	6233.93	6233.93	6233.93	6233.93	6233.93	6233.93	6233.93	6233.93	6233.93	6233.93	6233.93	9689.48	9689.48	9689.48	9689.48	9689.48	9689.48	7510.46	7510.46	7510.46	7510.46	7510.46	7510.46
602		34309.3	34792.9	34914.1	33962.7	33218.2	33518.7	52480.5	53273.2	53751.3	52554.4	52837.7	52681.7	55345.6	57536.2	56793.8	56202.5	62135.8	60747	60982.1	61327	62078	61141.4	58435.2	59781.2	34947	34947	34947	34947	34947	34947	34947	34947	34947	34947	34947	34947	6069.29	6479.69	6713.03	6339.77	6364.54	6202.7	14127.6	14164	14188.2	14165.5	14068.3	14113.4
603		48705.8	56750	63892.1	57274.6	53194.4	47730.5	17994.6	18355.8	17622.8	17842.2	20663.9	21385.4	16870.6	13524	12997.5	14645.7	11423.4	17308	17978.1	12735.6	9536.06	9728.38	9572.72	8540.82	9542.82	9542.82	9542.82	9542.82	9542.82	9542.82	9542.82	9542.82	9542.82	9542.82	9542.82	9542.82	12260.3	12187.4	12667.1	12875.7	12871.8	12771.7	14354.3	14364.6	14376.4	14395	14403.9	14377
604		30640.2	29844.2	31341.5	31461.5	30559.5	30693	10626.8	10128.2	9407.58	11034.4	10507.3	9374.69	5923.68	9317.08	13873.6	16376.9	14416.6	8461.36	8267.47	9152.85	7381.92	6473.74	9041.14	12025.6	4742.21	4742.21	4742.21	4742.21	4742.21	4742.21	4742.21	4742.21	4742.21	4742.21	4742.21	4742.21	13244.9	13016.7	11826.3	12211.6	12607.3	12514.1	5833.47	5804.31	5803.34	5817.43	5804.12	5787.82
605		46904.3	48839	46331.9	43983.5	47045.4	51279.2	30291.4	27318.4	24101.5	25330.2	28634.9	31334.3	33245.8	22195.2	16255.8	18521.4	24954.8	16447.9	15153.3	23329	29208	24919.7	23814.1	16051.2	9861.2	9861.2	9861.2	9861.2	9861.2	9861.2	9861.2	9861.2	9861.2	9861.2	9861.2	9861.2	20727.9	20741.5	20980.6	20944.4	21103.7	21229	8023.38	8022.16	8018.2	8022.87	8023.37	8021.58
606		34187.6	34105.2	35318.1	36128.3	39408.8	43900.9	4602.27	4296.49	3881.45	3673.98	3988.28	4144.2	2205.96	2256.83	2890.19	2824.93	3637.33	3540.66	3305.69	3726.62	2936.81	5011.82	3953.04	3212.57	1471.07	1471.07	1471.07	1471.07	1471.07	1471.07	1471.07	1471.07	1471.07	1471.07	1471.07	1471.07	10758.4	10834.1	10441.1	10667.8	11044.5	10971.2	8935.43	8875.18	8871.25	8940.68	8905.95	8915.78
607		41824	39631.4	40249.2	44837	44561.4	45108	20538.2	19563.8	18992.4	19522.6	18663.2	18537.1	13556.7	8664	9808.12	17226.7	24262	22281.9	18110.6	15257.7	10353.6	15084.4	17864.8	9728.15	10345	10345	10345	10345	10345	10345	10345	10345	10345	10345	10345	10345	15845.4	15670.2	14817.2	15250	14418.3	13631.4	6901.17	6917.4	6892.5	6858.38	6871.11	6865.92
608		43215.6	43084.9	44254.1	43439.8	42076.3	42970.2	38657.6	38746.5	38876.3	38617.7	38702.3	38626.5	41196.3	46095.3	48460.4	45002.4	43286.7	42661.1	43609.9	41104.7	41273.2	42921.3	41471.2	43041	26003.4	26003.4	26003.4	26003.4	26003.4	26003.4	26003.4	26003.4	26003.4	26003.4	26003.4	26003.4	5733.04	5733.1	5732.06	5732.11	5731.68	5731.84	7046.8	7046.62	7046.2	7046.26	7046.47	7046.72
609		18575.4	18473.2	18621	17582.5	19854.1	22945.4	25342	24546.1	22796.1	22629.3	23798.3	24251.5	15593.2	10817	9199.77	11611	13321.2	12835.2	11653.3	11101.7	13650.7	16419.8	11795.5	10398.5	8842.64	8842.64	8842.64	8842.64	8842.64	8842.64	8842.64	8842.64	8842.64	8842.64	8842.64	8842.64	11816	11582.7	12126.6	12593.6	12087.5	11579.8	11658.7	11692.6	11679.2	11678.8	11704.5	11694.6
610		22300.7	22294.5	24657.9	25703.1	23282.6	23612.2	35427	35218.8	34653.1	33837.1	33611.8	35471.9	26487.1	20009.3	26462.4	32462.1	22588.6	16011.5	17284.2	24867.9	25893.4	20715.8	12324.7	12299.5	13904.4	13904.4	13904.4	13904.4	13904.4	13904.4	13904.4	13904.4	13904.4	13904.4	13904.4	13904.4	17403.8	17584.8	16684.1	15850.3	17176.9	17643.5	9325.72	9325.54	9340.04	9298.98	9326.66	9304.09
611		53085	58396.9	59157.4	58959.8	59525.4	52712.6	54064.8	50144.3	51233	56952.4	53160.1	54032.9	64700.3	79570	61453.1	49667.5	42015.3	46090.2	58939.3	49952.9	34231.4	38643.9	66612.5	53065.7	26968.8	26968.8	26968.8	26968.8	26968.8	26968.8	26968.8	26968.8	26968.8	26968.8	26968.8	26968.8	18527.4	18846.5	19666.5	19735.5	18912	18168.4	10865.1	10865.1	10861.6	10900.4	10865.7	10798.4
612		63352	62530.3	62529.9	59869.3	58806	64130.7	41519.2	39001.7	39307.3	41814.1	41846.2	41955.9	42909.3	41129.7	46811	47371	41474.9	40227.1	41723.8	40075.6	42220	42222.6	40724.3	43358.5	25591.5	25591.5	25591.5	25591.5	25591.5	25591.5	25591.5	25591.5	25591.5	25591.5	25591.5	25591.5	19854.2	19892.1	19962.3	19749.8	19266	19405.1	7607.8	7613.14	7620.46	7608.18	7603.79	7610.65
613		45369.2	49645.7	59110.4	56830.8	60292.3	57780.6	47661.4	48954.9	56345.5	58610.5	53859.6	53058.5	42331.6	38361.9	40468	58208.9	39791.2	37293.2	51454.2	44312.1	27401	32303.6	33071.4	36956.3	18481	18481	18481	18481	18481	18481	18481	18481	18481	18481	18481	18481	13051.3	12913.5	13890.7	14250.6	12855.8	13114.8	7178.12	7163.23	7177.71	7189.95	7189.91	7163.66
614		36543.4	36382.5	33445.2	35309.7	40030.2	36246.3	18945.1	19344.8	19697.5	19120.7	19365	19611.5	18167.4	14314.7	8010.07	11689.8	11289.2	13455.5	26052.8	15804.9	8483.32	8765.38	10934.4	12255.1	7707.94	7707.94	7707.94	7707.94	7707.94	7707.94	7707.94	7707.94	7707.94	7707.94	7707.94	7707.94	5448.25	5268.27	4909.77	5335.17	5474.37	5173.47	8248.08	8269.91	8325.22	8312.58	8265.68	8257.9
615		46473.3	45308.7	44196	45895.9	47434.3	44327.1	17601	20098.4	20530.8	17963.1	17525.7	17556	15284.3	16509.2	17530.4	16622.8	13933	16410.6	17475.1	14912.2	14934.2	13784.6	17115.3	16203.1	9541.6	9541.6	9541.6	9541.6	9541.6	9541.6	9541.6	9541.6	9541.6	9541.6	9541.6	9541.6	19670.2	20381.2	20828.4	19885.1	19550.1	20227.7	2407.77	2401.76	2402.71	2405.86	2407.98	2406.2
616		46735	47935	50374.3	51593.2	52352.3	49758.5	24521.7	24782.4	26206.2	26153.2	25649.1	25603.6	21687.8	23936.7	30211.3	28678.7	26854.7	24698.7	26910.6	35053.8	30650.3	22329.9	23708.3	24738.2	14801.8	14801.8	14801.8	14801.8	14801.8	14801.8	14801.8	14801.8	14801.8	14801.8	14801.8	14801.8	6566.96	6596.16	6525.89	6300.83	6308.47	6366.67	12122.6	12137	12143	12159.6	12183.6	12156
617		57374.8	55882	54768.1	56551.4	51507.4	48831.7	18985.9	18054.5	18614.7	21987	20054.3	19490.3	22538.3	13605.7	14114	15884.1	13193	14219.5	16186.2	16862.5	17100.8	22936.9	26071.7	15226.6	8169.68	8169.68	8169.68	8169.68	8169.68	8169.68	8169.68	8169.68	8169.68	8169.68	8169.68	8169.68	14770.9	13504.5	13681.4	15296.7	15655.8	15232.2	6197.22	6221.48	6198.45	6215.02	6252.64	6254.98
618		31125.7	30077.4	30788	30740.5	30344.6	30635.1	2778.11	2815.56	3141.07	3187.13	2999.69	3213.26	2749.8	1735.39	1596.61	1886.35	1959.69	2299.56	1667.18	1675.87	1675.96	1233.29	1625.56	2140.47	1271.03	1271.03	1271.03	1271.03	1271.03	1271.03	1271.03	1271.03	1271.03	1271.03	1271.03	1271.03	12892.8	13362.2	13077.6	12842.7	15025.5	15349.2	2146.37	2152.07	2166.57	2159.04	2151.97	2146.83
619		14282.1	14784	17339.5	17809.3	16685.3	15068.8	46585.5	52216	53065.3	53414.7	52313.1	45931.1	26845.4	37299.2	41160.5	28965.6	27302.2	46904.7	56005.3	43541.6	56863.8	57051.8	31088.8	28661	17618.7	17618.7	17618.7	17618.7	17618.7	17618.7	17618.7	17618.7	17618.7	17618.7	17618.7	17618.7	14259.8	13510.3	12582	12732.3	12996.3	13666.8	11722.2	11672.8	11688.6	11729.8	11743.4	11726.9
620		52416.2	50017	48106.2	49372.7	48247.7	48290	11022.2	11177.5	11274.5	10882.5	11158.9	11452	11852.3	11146.5	10788.2	11949.4	12092.9	11124.1	10519.2	10428.1	12262	12247.8	10905.6	11679.1	7591.23	7591.23	7591.23	7591.23	7591.23	7591.23	7591.23	7591.23	7591.23	7591.23	7591.23	7591.23	14828.2	14595.2	14460.4	14741.6	14307.3	14444.1	7156.68	7150.59	7156.2	7153.16	7145.3	7128.18
621		44105	43160.3	44445.8	47108.5	46151.3	45957.8	30606.3	29409.9	28231.3	29916.7	31559.7	28821.7	22247	20567.1	21031.7	34961.8	29803.1	30523.8	23343.2	18531.5	19099.6	28472.9	33949.8	15197.4	8520.6	8520.6	8520.6	8520.6	8520.6	8520.6	8520.6	8520.6	8520.6	8520.6	8520.6	8520.6	14002	12894.5	12443.4	14075.7	14623.2	14174.5	9357.41	9391.24	9365.5	9314.76	9345.52	9359.18
622		31750.5	32326.9	32204.8	30852.4	31624.7	32766.2	14296.3	14312.9	14601.3	14229.2	13933.4	14377.9	8717.04	7066.42	5795.92	6939.94	7770.05	7770.7	7938.44	6986.16	5412.93	5127.48	7038.39	8021.64	4860.42	4860.42	4860.42	4860.42	4860.42	4860.42	4860.42	4860.42	4860.42	4860.42	4860.42	4860.42	10434	9991.15	10101.8	10195.9	9004.99	8838.89	696.671	698.668	703.858	706.533	704.288	701.344
623		62475.3	63901.9	62049.6	59038.5	55030.8	56925.8	51719.3	48994.8	52256	54044.6	52002.4	54348.7	41917.8	35557.6	46588.3	42413.5	38958.9	38098	42206.7	51280.9	54596.5	49231.8	42489.9	47935.2	37476.3	37476.3	37476.3	37476.3	37476.3	37476.3	37476.3	37476.3	37476.3	37476.3	37476.3	37476.3	10599.6	10135.4	9608.9	10315.5	10590.4	10569.9	4204.99	4185.45	4166.41	4176.38	4170.32	4175.53
624		27186.7	25922.6	25689.6	27441.2	27472.1	25601.8	50413.5	54516.7	56066.5	53176.3	51048.4	53336	31704.9	30809.1	35474.3	29221.4	29288.2	32268.1	23459.9	19851.8	31282.2	51546.1	30518.4	19381.8	18841.1	18841.1	18841.1	18841.1	18841.1	18841.1	18841.1	18841.1	18841.1	18841.1	18841.1	18841.1	10409.1	10150.9	10400.7	10563	10353.4	10122.6	6765.52	6807.61	6778.34	6709.94	6730.78	6794.61
625		39675	39616.5	40373.1	41309	37650.7	36871	42451.2	39784.9	39295.3	40648.3	41489.4	43336.3	36177.7	36085.3	37893	40349	33087	29709.8	31981.9	25732.7	28731.5	40159.4	43388.6	39121.1	28403.9	28403.9	28403.9	28403.9	28403.9	28403.9	28403.9	28403.9	28403.9	28403.9	28403.9	28403.9	12576.2	12596.5	12141.2	12088.4	12153.5	12226.3	13470.7	13456	13460	13451.1	13436.5	13439.7
626		22412.8	23009.5	21701.7	20707.5	21172.3	21424.4	29923.1	28823.8	28449.4	29451.5	29578.8	30171.5	31566.4	27152.4	27795.3	29012.1	26360.4	27732	27491.4	25810.9	27204.6	29263.9	31717	34151.6	18712.8	18712.8	18712.8	18712.8	18712.8	18712.8	18712.8	18712.8	18712.8	18712.8	18712.8	18712.8	15766.4	15747.9	15589	15647	15864	15798.3	2880.7	2879.75	2880.75	2880.43	2879.12	2879.9
627		14729.7	14758.9	14680.6	14577.7	14451.6	14558.3	3291.83	3293.93	3253.54	3207.96	3262.98	3268.61	4058.39	4117.74	4139.88	4165.82	4147.15	4026.49	4030.73	3991.64	4020.82	4119.43	4158.88	4164.42	2433.26	2433.26	2433.26	2433.26	2433.26	2433.26	2433.26	2433.26	2433.26	2433.26	2433.26	2433.26	19240.5	19034.1	19592.1	20095.7	19433.9	19522.2	12303.9	12289.2	12272	12286.9	12294.2	12278.7
628		45518	44228.3	44580.9	48269.7	51069.3	48368	3910.45	4058.15	4087.83	3914.53	4137.52	4174.13	3692.14	3888.56	3933.92	3605.5	4252.86	3802.61	3775.17	4100.91	3703.04	3729.12	3685.28	4127.88	2483.76	2483.76	2483.76	2483.76	2483.76	2483.76	2483.76	2483.76	2483.76	2483.76	2483.76	2483.76	9173.11	8859.55	8429.29	8785.16	9153	9153.12	6479.54	6462.52	6464.18	6482.87	6481.4	6461.85
629		33755.2	34715.9	35910.6	36227.2	34475.8	33172.9	1194.99	1143.54	1045.02	1058.19	1103.7	1073.39	867.052	1210.4	1105	914.81	834.803	1003.06	1334.34	1310.74	1166.48	1083.4	823.83	702.992	488.385	488.385	488.385	488.385	488.385	488.385	488.385	488.385	488.385	488.385	488.385	488.385	12975.4	13203.9	13012.4	12767.1	12816.1	12724.3	5017.49	5013.78	5015.39	5018.86	5016.67	5014.99
630		49674.9	50563	55429.6	61688.5	57586.4	52894.1	13209.9	12659	12686.4	12932.9	13042.7	13548.7	13405.2	9782.24	12043	12634.2	11463	15372.8	10632.9	8594.71	7010.36	9368.56	10267.6	8555.64	5950.35	5950.35	5950.35	5950.35	5950.35	5950.35	5950.35	5950.35	5950.35	5950.35	5950.35	5950.35	20228.1	20442.9	19805.9	18956.9	19667.5	20014.2	9940.83	9964.72	9913.81	9891.83	9933.01	9943.61
631		60836.6	61239.2	64265.6	63440.5	63761.8	68743.4	20751.4	19232.8	19412.5	20763.2	19892.8	18802.6	12734.5	13789.1	15308.7	14183.1	15862.3	19812.3	16479.4	14395.3	14262.8	15482.6	17819.7	13663.6	9465.63	9465.63	9465.63	9465.63	9465.63	9465.63	9465.63	9465.63	9465.63	9465.63	9465.63	9465.63	11062.8	11218.9	11421.3	11266.6	11123.5	10827.2	12066.5	12133.7	12130.1	12127.9	12122.4	12091.8
632		34380	33642	33563.8	35298	34518.2	32346.5	7254.12	7687.65	7400.94	7224.41	7625.76	7469.4	3582.34	4394.3	4554.44	3852.84	3782.18	3542.67	3319.68	3391.26	3416.09	3818.26	3897.29	4922.32	3107.63	3107.63	3107.63	3107.63	3107.63	3107.63	3107.63	3107.63	3107.63	3107.63	3107.63	3107.63	3461.14	3450.29	3469.66	3466.32	3418.46	3484.5	5682.88	5677.46	5673.33	5670.47	5671.74	5674.62
633		46643.7	45390.1	43036.1	42187.9	43707.2	46867.9	9705.41	9559.46	10040.8	10332.3	10395	10148.9	11122.3	9313.54	8444.72	9005.36	9713.78	11372	10450.7	9050.75	9863.31	9555.8	8652.75	9662.58	6229.72	6229.72	6229.72	6229.72	6229.72	6229.72	6229.72	6229.72	6229.72	6229.72	6229.72	6229.72	17370.6	17369	17222.2	17011.1	17631.3	18460.7	5983.9	5971.59	5988.96	5985.76	5962.24	5954.84
634		22426.9	23907	26190.2	25408.7	26011.6	25320.9	12975.9	13212.8	12120.6	12463.4	13098.8	12497	8334.41	10324.5	12818.5	12546.8	10763.7	9470.16	7306.65	8220.43	11063.2	9177.16	8023.79	7997.67	6399.21	6399.21	6399.21	6399.21	6399.21	6399.21	6399.21	6399.21	6399.21	6399.21	6399.21	6399.21	7709.56	7699.12	7757.33	7791.88	7821.26	7867.99	6085.78	6083.33	6082.23	6081.93	6083.01	6084.08
635		37191.7	39345.2	39917.6	34447.6	34318.2	35101.4	29076.5	29394.4	28735.2	30232	29082.7	27600.8	20516.3	34141.2	30495.9	24349.9	21224.4	21248.3	19897.8	19305.8	22727.9	22568.7	15731.5	16148.5	16394.9	16394.9	16394.9	16394.9	16394.9	16394.9	16394.9	16394.9	16394.9	16394.9	16394.9	16394.9	23159.3	22603.1	20550.6	20617.9	21919.9	22164.5	2410.04	2410.15	2405.79	2408.86	2408.11	2406.51
636		49772.4	47808.9	47751.7	46334.9	39967.4	42645.2	13069	12443.5	11721.2	12166.3	12471.3	12921.3	12502	9323.31	8487.28	9302.24	9992.23	13672.9	10794.1	9673.4	7684.87	7531.67	6168.06	4372.38	3499.64	3499.64	3499.64	3499.64	3499.64	3499.64	3499.64	3499.64	3499.64	3499.64	3499.64	3499.64	15328	15766.1	16193	15791.4	16105.6	16127.5	16241	16279.7	16378.6	16355.5	16280.5	16275.6
637		15301.5	15485	15361.5	14960.8	14991.5	15540.7	8465.97	8332.57	8365.06	8355.13	8180.01	8240.93	4085.86	3993.38	4195.31	4522.4	3535.09	3415.27	3982.02	3523.25	3568.94	3927.6	3602.99	3849.74	2923.91	2923.91	2923.91	2923.91	2923.91	2923.91	2923.91	2923.91	2923.91	2923.91	2923.91	2923.91	11431.3	11201	11310.8	11620.7	11780.3	11916.1	6448.69	6450.77	6460.59	6467.41	6466.59	6465.84
638		16081.1	17887.2	21444.4	20911.8	19504.8	19034.5	8160.95	7568.03	6886.87	7235.61	7246.89	6987	3814	4386.81	3535.58	2910.04	4408.77	7521.91	8911.58	6298.36	4123.69	5274.08	4790.82	9103.42	5337.03	5337.03	5337.03	5337.03	5337.03	5337.03	5337.03	5337.03	5337.03	5337.03	5337.03	5337.03	12764.1	13033.1	13581.6	12301.3	12287.2	13571.3	13613	13664.6	13794.2	13780.9	13787.4	13695.7
639		53198.7	51795.5	50359	51570.3	47796.9	44127.5	27157.3	27928.4	29200.9	29129.5	27959.5	32523.8	43765.8	21513.6	14399.3	13471.9	18545.8	30490.4	32511.3	20791.3	25630.5	36567.8	27586	18602.2	11573.6	11573.6	11573.6	11573.6	11573.6	11573.6	11573.6	11573.6	11573.6	11573.6	11573.6	11573.6	17862.9	18138	17397.8	18034.3	20222.5	18994.5	8625.93	8606.87	8590.99	8608.66	8602.18	8610.56
640		41370.6	37871.2	40726.6	44573.1	43938.8	45777.7	17835.1	17519.6	18871.4	20376.4	18374.1	18274.1	13857.8	13640.3	14513	12623.1	16867.4	18814.8	18672.8	22737.6	23987	15955.4	10773	11362.1	6410.3	6410.3	6410.3	6410.3	6410.3	6410.3	6410.3	6410.3	6410.3	6410.3	6410.3	6410.3	10648.9	10375.2	10719.1	11022	11198.6	11045.4	8716.23	8770.82	8752.14	8701.98	8671.1	8678.62
641		31516	31613.5	32143.7	32167.3	31330.6	30608.1	13943.9	14096.2	14104.1	14204.5	14104.3	14079	6594.91	6408.96	5915.07	5769.86	5912.52	5367.52	6133.51	8831.49	7423.59	6635.56	6569.95	6414.29	4247.29	4247.29	4247.29	4247.29	4247.29	4247.29	4247.29	4247.29	4247.29	4247.29	4247.29	4247.29	8404.67	8304.39	8233.04	8578.18	8344.39	8307.47	12593.3	12540.5	12593.7	12650.6	12616.1	12650.9
642		38866.3	38863.1	38794.5	38682	38648.2	38659.5	9946.69	9972.55	9972.1	9987.32	10031.9	10033.1	12208	11969.6	11870.3	11884.5	11853.3	11811.6	11879	11855.3	11815.5	11950.8	11969.1	11870.1	7017.68	7017.68	7017.68	7017.68	7017.68	7017.68	7017.68	7017.68	7017.68	7017.68	7017.68	7017.68	10791.1	10567.3	10659.6	11130.2	11716.5	11983	12056.2	11985.1	11918.2	11976.8	12018.2	11961.8
643		23906	25949.4	26024	23353.7	23783.7	23525.6	29243	29936.9	30346.7	30090.9	29411.9	30117.2	20347.2	21304.9	18060.1	19124.4	28750.7	20764.5	15046	14490.6	18185.1	16178.3	12591.3	17014.7	12444.6	12444.6	12444.6	12444.6	12444.6	12444.6	12444.6	12444.6	12444.6	12444.6	12444.6	12444.6	16568.6	16715.7	17598.9	17601.8	16392.3	16148.6	12123.6	12148.4	12098.7	12100.1	12071.2	12062.7
644		42959.4	43085.1	42919.4	40195.5	42739.1	46441.7	23493.8	23303.1	22706	22983.1	23010.5	22680.2	23354.4	25872	24814.9	22817.5	22426.9	21252.7	21939.2	23139.4	20998.8	19913.6	21256.6	25547.6	16339.5	16339.5	16339.5	16339.5	16339.5	16339.5	16339.5	16339.5	16339.5	16339.5	16339.5	16339.5	18468.2	17968.5	17454.2	17806.6	17589.2	17495.5	11658	11649	11666.2	11686.6	11684.1	11658.2
645		41451.4	47571.5	45517	38866.1	42565	42408.1	25555.9	26408.6	27694.7	27481.6	28348.6	30497.4	25865.7	14017.2	12404.2	13045.4	15126.8	18186.8	22702.3	21626.4	17718.6	13845.8	10123.9	11570.6	9700.73	9700.73	9700.73	9700.73	9700.73	9700.73	9700.73	9700.73	9700.73	9700.73	9700.73	9700.73	16691.8	16823.4	16898.2	16702.2	16021.6	16075.3	14036.7	14023.8	14026.6	14030.9	14027.3	14032.5
646		28435.7	26699.6	25806.1	25960.8	26848.8	30282.3	1873.71	1813.01	1855.32	1924.96	1815.31	1707.06	814.958	1083.18	1534.93	1540.92	1400.44	1055.82	1300.35	1464.59	1043.68	814.988	784.369	934.37	634.044	634.044	634.044	634.044	634.044	634.044	634.044	634.044	634.044	634.044	634.044	634.044	18048.8	17420.9	17281.8	17543.9	16933.8	17948.4	4903.07	4910.79	4914.3	4909.23	4903.54	4867.78
647		54783.2	60242.2	64829	61128.6	58362.9	56454.6	41311.1	39502	40493.6	44454.3	41142	42383.5	32751.8	22081	20000.8	21499	19633.7	19478.4	34544.8	39668.2	31795.2	29637.9	20447.9	16683.5	11529.3	11529.3	11529.3	11529.3	11529.3	11529.3	11529.3	11529.3	11529.3	11529.3	11529.3	11529.3	15806.2	16127.7	16493.2	16653	15162.2	14392.9	5427.04	5412.76	5404.84	5416.04	5410.8	5455.32
648		32800.2	32307.4	31927.4	33958.6	36146.4	35385.2	53681.4	53293.7	55418.7	54728.5	56412.5	53218.2	36468.1	41674.5	55113.7	64713	47570	42025.1	43505.1	42843.8	42155.3	39915.2	41360.3	60264.5	44680.3	44680.3	44680.3	44680.3	44680.3	44680.3	44680.3	44680.3	44680.3	44680.3	44680.3	44680.3	9672.7	9801.32	10042.1	9668.17	10223.5	10438.8	14483.2	14588.9	14620.6	14439.3	14519.3	14576.9
649		61250.7	57102.4	55123.1	57059.6	58631.7	64822.7	16073.5	16290.8	16433.7	15697.7	15398.3	14942	14315	13129.7	10417.3	10255.3	10863.7	11412.7	9562.74	9682.66	10085.9	10412.3	14179.7	21943.4	8403.37	8403.37	8403.37	8403.37	8403.37	8403.37	8403.37	8403.37	8403.37	8403.37	8403.37	8403.37	13335.4	13296.1	13274.3	13287.3	13318.8	13325.5	11741	11743.7	11749.9	11749.7	11747.4	11746
650		18089	18297.8	17322.3	15816.5	15713.9	16909.7	18026.9	18331	17527.6	17030.2	16447	16356.7	9054.27	9614.47	11999.4	14920	14048.5	9644.34	7863.91	12630.8	12699.9	9434.86	10252	10860.8	5741.12	5741.12	5741.12	5741.12	5741.12	5741.12	5741.12	5741.12	5741.12	5741.12	5741.12	5741.12	10254	9967.18	11558.9	11693.5	10599.7	11078.3	6448.01	6460.93	6461.36	6465.78	6470.12	6447.08
651		38823.6	38558.8	38452.3	37990.8	37848.8	38526.1	5738.8	5682.21	5678.26	5575.69	5563.22	5619.82	2724.67	3519.52	3600.06	3567.69	3330.35	2698.33	2255.18	2709.18	2819.4	2424.69	2733.74	3463.02	2313.38	2313.38	2313.38	2313.38	2313.38	2313.38	2313.38	2313.38	2313.38	2313.38	2313.38	2313.38	14775.9	15312.5	15461.4	15035.7	14945.1	14275.2	4892.51	4894.74	4880.52	4894.18	4894.35	4891.44
652		16317.2	16285.7	16661.9	16945.5	17027.4	17162.2	34321.2	34767.2	32887.4	30946.1	29134.1	30934.6	29517.6	27547.8	25299.5	23813.3	26281.2	30225.2	35825.1	33810.6	28864.2	26892	28791.2	35216.8	21623.3	21623.3	21623.3	21623.3	21623.3	21623.3	21623.3	21623.3	21623.3	21623.3	21623.3	21623.3	14620.8	14218.2	14749.5	15576.5	15945.9	16113.3	7239.44	7235.15	7224.94	7244.42	7212.5	7202.71
653		40491.3	43955.4	42919.6	42565	46060.9	40214.6	53991.2	57119.9	51305	50932.8	52380.7	50517.7	44700.2	61246.8	46159.1	29443.9	41535.5	45789.2	39668.4	50598.6	50299.3	41305.7	25064.5	29410.8	38851	38851	38851	38851	38851	38851	38851	38851	38851	38851	38851	38851	17422.2	17980.5	17385.2	17307.5	16504.3	16401.1	12093.7	12073.8	12033.3	11996.5	12006.3	11987
654		35308.4	36453.6	35917.1	39360.2	47962.2	40577	57632.3	61927.9	63215.5	61352.8	66691.4	75725.6	90521.7	44721	31032.3	36496	65923.6	43962.5	32291.1	34292.2	32193.2	39094.1	32413.6	31498.4	26225.4	26225.4	26225.4	26225.4	26225.4	26225.4	26225.4	26225.4	26225.4	26225.4	26225.4	26225.4	15112.3	14472.4	15180.7	16388.6	16363.6	15714.9	8263.11	8260.03	8266.62	8293.58	8260.54	8278.6
655		32676.3	32158.8	32014.8	30857.1	33086.7	34912.7	16014.7	15837.9	15991.8	15768.5	16081.9	15558.2	11849.1	15522.7	16485.8	14925.6	15490.9	21989.9	19800.6	13078.5	14598.2	20045.4	13709.5	12610.4	8744.6	8744.6	8744.6	8744.6	8744.6	8744.6	8744.6	8744.6	8744.6	8744.6	8744.6	8744.6	14095.1	13618.8	14138.8	14810.8	14351.8	14076.8	7758.31	7729.91	7718.56	7748.87	7705.06	7717.68
656		51195.7	55439	57417.3	58430.3	56854.3	50173.2	11155.7	11881.4	11352.5	10942.4	10158.3	9756.48	8271.72	8284.56	8336.47	8487.53	8407.31	9576.73	8643.22	7784.12	9311.73	8486.91	7941.99	10094.7	5403.62	5403.62	5403.62	5403.62	5403.62	5403.62	5403.62	5403.62	5403.62	5403.62	5403.62	5403.62	14536.6	15192.6	14953.7	13813.9	14060.6	13817.2	9213.39	9233.67	9191.21	9198.13	9218.14	9218.54
657		26409.8	26994	28774.2	26236.1	24868.6	26146.6	36609.6	39793.4	42043.4	37831.5	36735.8	42859	35553.2	21736.7	27260.4	32956.8	30137.9	27696.6	24147.7	28907.4	36167.4	22180.1	27901.3	46423.2	22039.2	22039.2	22039.2	22039.2	22039.2	22039.2	22039.2	22039.2	22039.2	22039.2	22039.2	22039.2	16206.2	16044.6	16206.8	16591.9	15947.9	15569.8	7705.04	7709.03	7696.04	7689.78	7656.96	7670.38
658		47338.7	45686.8	46157.7	50592.5	48451.9	43675.3	17625.7	18507.9	19782.8	19428.7	18749.4	19028.3	19880.1	18517.5	17135.3	15749.9	16328.8	17992.9	21960.7	18919.9	16762.3	19327.1	19965.5	18158.6	11208	11208	11208	11208	11208	11208	11208	11208	11208	11208	11208	11208	13740.9	13950.9	14724.2	14302.3	13269.6	13332.7	7125.51	7131.49	7125.46	7131.64	7144	7163.96
659		25008.8	25082.5	28160.4	29352.9	28044.5	26632.6	20165.8	20321.7	20734.5	21563.9	21375.7	19444.5	9292.7	11723.7	11263.2	12820.1	18006.3	19395.5	17026.8	19630.9	18681.7	15327.7	13488.8	13125.2	8962.65	8962.65	8962.65	8962.65	8962.65	8962.65	8962.65	8962.65	8962.65	8962.65	8962.65	8962.65	4833.65	4821.26	4772.19	4805.07	4828.59	4785.47	10067.8	10069	10070.9	10074.1	10077.3	10071.7
660		38136	36744.4	38339.3	38939.3	38133.3	42987.6	20850.9	18398.1	18701.5	20921.5	19921	20603.8	22167.3	11304.6	9427.23	12080.8	11491.4	12014.7	16100.3	19771.5	8690.79	8035.99	11059	10293.9	8629.46	8629.46	8629.46	8629.46	8629.46	8629.46	8629.46	8629.46	8629.46	8629.46	8629.46	8629.46	20793.6	22468.5	24357.2	22702	21189	21323.4	11822.8	11840.2	11890.7	11829.3	11792.8	11806.6
661		48743.1	47227.6	44704.2	43622.9	44480.2	48997.8	38047.9	35576.3	35606.7	35419.6	36986.9	37865	20319	21775.9	22182.9	22083.4	17931.3	21733.1	22009.4	17544.8	22439.8	17420.7	17308.2	25221.6	13436.1	13436.1	13436.1	13436.1	13436.1	13436.1	13436.1	13436.1	13436.1	13436.1	13436.1	13436.1	13261.3	13454.7	13942.4	13590.5	13417	13523.1	6553.2	6570.88	6585.29	6575.26	6565.68	6559.36
662		35211.1	34404.3	34621.8	36306.4	36754.6	35772.2	1376.43	1373.43	1394.09	1397.48	1423.55	1435	833.535	847.345	645.385	601.217	642.417	841.25	886.822	897.058	914.224	717.421	649.944	652.505	517.881	517.881	517.881	517.881	517.881	517.881	517.881	517.881	517.881	517.881	517.881	517.881	19526.7	19810.9	17726	16719.8	17077.5	17575.2	11179.1	11134.2	11091.3	11121.9	11173.7	11105.3
663		49464.8	49107	45638.7	44728.6	46905.6	45118	18986.9	19777.6	19561.9	18974.8	19739.5	20691.7	21025.5	20158.8	19536.4	20247.6	20700.1	18799	19410.4	22275.3	20890.8	18312.4	18000.5	17423.1	11309.4	11309.4	11309.4	11309.4	11309.4	11309.4	11309.4	11309.4	11309.4	11309.4	11309.4	11309.4	11417.8	11592.5	11796.4	11729.8	11788.8	12085.3	12447.7	12421.7	12476.9	12474.4	12470	12478.3
664		33958.4	35852.4	38507.1	35478.9	36509.1	39381.6	33737.7	33117	33708.5	33951.8	34144.2	33605.1	18841.9	24986.9	33422.3	29322.9	23627	16458.6	20747.6	24733.8	23041	24934.2	19982.1	21252.1	12785.2	12785.2	12785.2	12785.2	12785.2	12785.2	12785.2	12785.2	12785.2	12785.2	12785.2	12785.2	12836.3	12650.2	14105.7	14665.1	12672.9	13140.8	7882.31	7898.16	7908.39	7853.51	7840.63	7856.85
665		46625.8	44494.7	44818.2	47833.2	47176.5	45325.1	21815.7	22378.1	23201.7	23322.4	23746.5	23353.3	13626.9	12455.4	11706.7	11508.9	12053.6	12126.1	13818.8	16917.9	12605.8	9800.35	10933.2	12972.9	7284.09	7284.09	7284.09	7284.09	7284.09	7284.09	7284.09	7284.09	7284.09	7284.09	7284.09	7284.09	17302.8	16543.6	16245.9	16585.9	15497.2	15420.2	9110.51	9132.64	9154.41	9126.78	9112.9	9129.91
666		57226.6	56682.1	56774.6	53282.8	48859.2	52745.5	9598	8822.03	8824.28	9771.98	9987.02	9418.36	7834.12	9108.01	5400.07	6914.02	8762.6	8551.5	8520.95	5442.64	5587.54	9243.62	6901.47	5983.83	4822.16	4822.16	4822.16	4822.16	4822.16	4822.16	4822.16	4822.16	4822.16	4822.16	4822.16	4822.16	17012.2	16670.6	16853.5	17833	16216.4	16208	3458.53	3445.18	3444.8	3442.74	3439.65	3447.7
667		24277.3	24600.5	24671	24439.5	25216.5	25609	19302.7	19515.1	19281.5	19133.9	19186.2	19055.3	8868.63	8646.58	10396.9	10774.7	10394	11275.8	13147.1	13434.2	10422.5	8620.67	7630.75	7392.61	4627.12	4627.12	4627.12	4627.12	4627.12	4627.12	4627.12	4627.12	4627.12	4627.12	4627.12	4627.12	14780.3	15167.6	14784	14266.2	14743	15343.9	12675.6	12632.5	12570.7	12567.6	12578.3	12604.4
668		43166.6	44549.4	45604.8	39521.1	42606.7	54355.8	437.52	378.488	420.748	452.526	394.235	403.566	349.139	333.877	285.588	242.208	311.738	261.716	228.547	235.4	307.826	347.9	330.511	440.754	241.06	241.06	241.06	241.06	241.06	241.06	241.06	241.06	241.06	241.06	241.06	241.06	10668.1	10665.7	11065	11251	10783.2	10499	3404.13	3412.77	3404.54	3396.91	3403.72	3413.53
669		43672.1	44832.3	45001.5	44881.8	44447.7	42358.5	5636.62	5834.96	5880.56	5800.41	5868.76	5680.96	2090.13	2233.07	2244.85	2262.96	2386.48	2931.09	3859.14	3384.99	2759.34	2617.48	2494.08	2347.73	1569.23	1569.23	1569.23	1569.23	1569.23	1569.23	1569.23	1569.23	1569.23	1569.23	1569.23	1569.23	14247.8	14757.6	14990.8	14553	14957.6	15503.7	8722.44	8694.92	8686.45	8707.06	8700.27	8700.3
670		29243.9	27574.3	28708.2	33294.7	30799.5	27087.2	40196.1	42281.7	47413.8	48926.4	48418.1	47367.2	33814	29312.6	27903.5	33081.1	37550.7	28287.9	21355.8	21907.6	29445.2	27143.3	24886.8	20427.9	11071.6	11071.6	11071.6	11071.6	11071.6	11071.6	11071.6	11071.6	11071.6	11071.6	11071.6	11071.6	6399.49	6606.17	7012.44	6658.72	6498.6	6783.85	9053.62	9084.92	9155.89	9115.23	9056.58	9053.58
671		30834.1	30107.2	29064.4	29212.9	29924.7	30360.5	7680.53	7670.77	7721.93	7656.32	7621.36	7716.06	8265.01	8085	8187.85	8314.35	8170.72	8397.62	8689.01	8637.86	8387.1	8287.14	9245.5	9396.48	5086	5086	5086	5086	5086	5086	5086	5086	5086	5086	5086	5086	8784.01	8780.71	8606.49	8493.76	8744.14	8884.93	3540.33	3543.04	3544.36	3538.91	3539.19	3538.71
672		37447.4	35754.6	29827.5	31308.1	33597	33891.3	562.456	534.873	545.775	564.899	566.129	550.084	285.548	282.237	293.976	355.556	405.274	178.854	227.13	441.129	414.315	343.358	258.764	278.677	264.646	264.646	264.646	264.646	264.646	264.646	264.646	264.646	264.646	264.646	264.646	264.646	6181.63	5925.23	6072.49	6355.03	6071.71	6555.77	4067.83	4036.4	4037.5	4061.59	4054.66	4038.32
673		25585	26132.6	24191	21115.8	22392.5	22883.9	42927.1	45141.1	42870.7	44061.5	44859.3	41639.5	33227.7	52838.6	31597.4	24532.8	30989.8	45436	37634.2	20053.5	27105	36367.3	30368.9	43353.8	22878.5	22878.5	22878.5	22878.5	22878.5	22878.5	22878.5	22878.5	22878.5	22878.5	22878.5	22878.5	14490.7	15034.2	15483.2	14408.2	14103	14845.8	4934.37	4941.62	4933.27	4918.66	4930.41	4923.76
674		42445.3	43967.9	46167.5	45154.7	43451.6	45354.4	12032.6	11842.6	12350.8	11598.6	11365.6	11941.4	9261.27	9841.14	10294.4	7770.29	8666.56	10359.8	10589	12785.8	13353.9	12597.9	11051.4	11965	7366.69	7366.69	7366.69	7366.69	7366.69	7366.69	7366.69	7366.69	7366.69	7366.69	7366.69	7366.69	13710.9	14076.6	14168	13645.5	13211.8	13472.8	5241.06	5239.63	5237.3	5234.76	5223.02	5226.29
675		57213.9	53937.2	54228.8	55288.4	51085.5	56682.3	24185.2	22182.8	20602.1	22163	23853.3	23971.4	26995	26359.5	29532.2	16102.2	13058.9	16400.3	17797.1	17742.3	20071.8	24134.2	18100.2	20686.2	12251.2	12251.2	12251.2	12251.2	12251.2	12251.2	12251.2	12251.2	12251.2	12251.2	12251.2	12251.2	19701.7	19222.6	17411.4	17982.5	18777.7	18394.6	9441.71	9425.55	9483.13	9507.44	9449.39	9424.51
676		42981.7	47494.4	42098.1	37060.5	43226.6	45997.5	264.299	241.781	229.626	223.527	221.154	241.768	184.534	138.519	128.188	165.254	218.583	183.703	257.709	273.402	169.407	127.369	173.106	217.337	97.4534	97.4534	97.4534	97.4534	97.4534	97.4534	97.4534	97.4534	97.4534	97.4534	97.4534	97.4534	16324.5	16258.9	16609.8	17109.2	17294.4	17243.6	6542.69	6569.55	6536.73	6531.85	6532.99	6506.99
677		30974.9	32459.9	37646.6	37838.5	35451	35993.5	10512.9	9754.58	10213.7	11198	11377.4	11288.7	8351.95	5299.16	5117.28	6914.11	6669.15	9669.32	8285.38	5951.84	8077	6055.35	4498.49	4625.31	4591.11	4591.11	4591.11	4591.11	4591.11	4591.11	4591.11	4591.11	4591.11	4591.11	4591.11	4591.11	17504.8	16608.7	17020.3	18802.8	18479.8	17896.6	8249.43	8250.62	8238.42	8256.86	8258.07	8244.21
678		46201.9	48085.5	39691.4	35170.3	38187.9	41345.3	28638.4	27198.3	27715.4	31143.6	31214.8	27625.2	23122.6	29566.4	24216.6	16148.3	17757.2	14985.8	8228.53	8544.44	15450.1	16429.1	15295.6	15073.1	10454.3	10454.3	10454.3	10454.3	10454.3	10454.3	10454.3	10454.3	10454.3	10454.3	10454.3	10454.3	5747.4	5985.04	6368.5	5883.14	5945.19	6468.3	9490	9460.16	9510.48	9568.43	9613.93	9546.94
679		30870	30424.1	30342.4	29816.5	29088.2	30213.9	25061.4	25955.1	24657.7	23352.1	23790.5	24042.2	27443.3	29249.4	24767.7	23682.8	21995.6	22797.1	24931.4	23784	26449.1	25219.6	21922.5	22490.8	14469.1	14469.1	14469.1	14469.1	14469.1	14469.1	14469.1	14469.1	14469.1	14469.1	14469.1	14469.1	13855.9	14804.2	14811	14129	14544.3	14189.5	6808.28	6791.41	6850.62	6870.41	6821.57	6817.06
680		46055.3	44723.2	44867.1	46418	43645.5	42300.4	21415.9	21553.4	21935.8	22128.8	22092.6	22463.6	23461.2	22332.1	22169.3	21998.4	22068.6	24190.6	22942	20918	21579.6	23353	24244.9	23668.8	13622.2	13622.2	13622.2	13622.2	13622.2	13622.2	13622.2	13622.2	13622.2	13622.2	13622.2	13622.2	16364.1	16276.7	16374.4	16255.3	16092.4	16665.1	6067.62	6055.45	6060.94	6075.81	6077.94	6070.59
681		51868.5	51789	51746.8	51765.6	51791.4	52102.4	61819.2	61453.3	61848.8	61970.3	61778	61436.4	71303.6	71677.7	71646.8	72037.1	72956	74164.9	73521.4	72981.5	72769.9	72893.6	73118.6	72321.8	42926.1	42926.1	42926.1	42926.1	42926.1	42926.1	42926.1	42926.1	42926.1	42926.1	42926.1	42926.1	9143.27	9070.02	9200.83	9451.57	9144.03	8833.2	6564.81	6579.58	6569.77	6561.01	6560.03	6559.52
682		40977.4	43584.8	41828.9	41016.3	43047.5	38558.3	39229.2	43105	39122.4	37221.8	43212.4	42230	19735.7	22825.1	36006.4	35409.6	26984.6	26187.3	22275.2	18448.9	24847.9	38527	36550.2	29385.3	15748.1	15748.1	15748.1	15748.1	15748.1	15748.1	15748.1	15748.1	15748.1	15748.1	15748.1	15748.1	21952.7	22649.8	21733.1	21127.4	21687	20069.2	7861.8	7888.21	7923.79	7923.77	7900.28	7915.42
683		48381.9	52375.6	53113.8	49304.9	53547	58942.6	18892.9	17887.2	18136.1	18878.8	19695.9	18021.8	9471.22	6488.89	4748.45	4768.32	7675.91	9991.78	9113.2	9300.56	7090.18	7269.8	10870.4	10658.7	6499.02	6499.02	6499.02	6499.02	6499.02	6499.02	6499.02	6499.02	6499.02	6499.02	6499.02	6499.02	17344.9	17155.6	16265.8	16220.5	17644.5	17740.4	8727.93	8735.06	8757.14	8749.84	8704.08	8730.19
684		27737.6	28084.2	29951.6	27256.6	26731.7	30234.9	46203.3	46933.9	48386.2	48267.5	44678.3	42432.2	19021.8	26522	28747.5	27033.6	26539.1	23576.1	23339.3	27189.6	29985	30498.3	26411.5	23381.4	17058.7	17058.7	17058.7	17058.7	17058.7	17058.7	17058.7	17058.7	17058.7	17058.7	17058.7	17058.7	8378.08	8681.59	9542.11	9348.5	8946.41	8862.23	8442.24	8445.18	8481.16	8488.38	8446.47	8433.77
685		46985.5	45782	47579.6	51124.6	46428.1	44546.3	5778.49	5884.45	5769.45	5583.45	5658.88	5962.85	4998.43	3755.09	3700.27	4802.6	5771.78	4908	6257.59	4430.97	2926.81	4367.42	4550.57	5545.5	3443.68	3443.68	3443.68	3443.68	3443.68	3443.68	3443.68	3443.68	3443.68	3443.68	3443.68	3443.68	13036.4	12236.3	12178.8	12985.5	12924.8	12730.8	14107.1	14064.1	14065	14123.5	14106.5	14133.1
686		41655.1	40069.1	39295.2	41877.1	46234.9	49287.5	60073.5	57579.3	55795.4	55879.1	58073.3	57762.8	48831.3	34052.7	32242.9	45236.1	68424.7	66648.8	42322.8	39847.4	45753	52622.8	52296.2	47988.3	26210	26210	26210	26210	26210	26210	26210	26210	26210	26210	26210	26210	15795.6	15066.7	14168.6	14361.2	15233.3	15942.3	8244.55	8201.32	8242.57	8308.44	8246.17	8193.98
687		39502.9	39502.9	39502.9	39502.9	39502.9	39502.9	22542.8	22542.8	22542.8	22542.8	22542.8	22542.8	8405.79	8405.79	8405.79	8405.79	8405.79	8405.79	8405.79	8405.79	8405.79	8405.79	8405.79	8405.79	5858.58	5858.58	5858.58	5858.58	5858.58	5858.58	5858.58	5858.58	5858.58	5858.58	5858.58	5858.58	19484.5	18975.2	18573.5	19380.4	19221.7	19666.8	10850	10818.7	10840.4	10844.9	10821.2	10806.3
688		39099.8	39462.8	36751.2	32421.7	35524.2	41936.4	14467.7	13646.6	14646.2	14246.6	13119.5	13782.6	7222.2	6991.32	13603.3	14519.9	9680.76	10227.3	11176	11156.5	10617	11502.9	13968.7	9137.68	6755.01	6755.01	6755.01	6755.01	6755.01	6755.01	6755.01	6755.01	6755.01	6755.01	6755.01	6755.01	7605.9	7808.35	7454.5	7226.86	7823.02	7968.8	6210.73	6204.27	6225.76	6220.77	6214.26	6213.37
689		32492.6	36086.7	45050.9	43359	39031.1	36037.9	34826.6	37442.6	38493.2	37813.4	36328.6	36160.1	20915.7	22491.2	35384.5	32394.4	26859.3	26357.4	27438.2	26660.5	17212	18385.8	27158.5	26423.9	19019.6	19019.6	19019.6	19019.6	19019.6	19019.6	19019.6	19019.6	19019.6	19019.6	19019.6	19019.6	8675.17	9314.44	9671.63	9154.87	8767.15	8485.74	12566.3	12600.9	12569.5	12537.9	12572.1	12535.7
690		30509	30201.6	29685.3	29732.3	29456.3	29968.7	1528.13	1521.48	1514.74	1485.54	1470.59	1474.63	1624.46	1835	1678.74	1517.13	1439.12	1334.36	1429.81	1811.37	1534.79	1494.94	1700.85	1951.6	902.76	902.76	902.76	902.76	902.76	902.76	902.76	902.76	902.76	902.76	902.76	902.76	9209.28	9162.4	8747.84	8682.05	8842.34	9495.59	8712.92	8729.7	8727.59	8661.28	8652.26	8640.04
691		38889.2	42505.5	43778.1	37872.6	36416.9	40086.7	36804.2	35802.2	34975.9	34133.6	35588.2	35668.5	32711.5	31930.3	35470.2	41380.1	44452.2	39295.8	35698	34716.3	35723.8	38768.9	38402.6	38021.6	22107.9	22107.9	22107.9	22107.9	22107.9	22107.9	22107.9	22107.9	22107.9	22107.9	22107.9	22107.9	18643.5	18535.1	18393.9	18560.9	18483.1	18359.9	8234.69	8237.35	8234.24	8232.29	8233.81	8232.64
692		34188.9	36358.9	37870.8	36136.1	36858.7	34652.5	7050.09	7371.38	7594.94	7430.06	7287.66	7459.57	4638.46	4433.21	4031.3	3739.78	4635.61	4776.12	2986.27	2728.16	3371.21	3926.65	5171.96	5709.95	2799.18	2799.18	2799.18	2799.18	2799.18	2799.18	2799.18	2799.18	2799.18	2799.18	2799.18	2799.18	12536.1	12819.7	13168.6	12897.8	12653.9	12613.4	4276.71	4273.67	4274.77	4276.79	4277.36	4279.23
693		55475.9	54936.2	54358.7	50560.7	48144.5	52852.8	68967.9	70057.8	76283.6	79051.7	83798.6	79153.7	58937.8	46968	48836.3	61801.1	44697.9	41863.7	51659.1	54876.9	53492.2	35608.8	36062	51114.7	36683	36683	36683	36683	36683	36683	36683	36683	36683	36683	36683	36683	16166.6	15551.9	14787.3	14510.3	14674.4	15593.8	5518.27	5511.78	5525.3	5542.04	5531.17	5501.17
694		19174.5	19174.5	19174.5	19174.5	19174.5	19174.5	11601.2	11601.2	11601.2	11601.2	11601.2	11601.2	4325.89	4325.89	4325.89	4325.89	4325.89	4325.89	4325.89	4325.89	4325.89	4325.89	4325.89	4325.89	3015.01	3015.01	3015.01	3015.01	3015.01	3015.01	3015.01	3015.01	3015.01	3015.01	3015.01	3015.01	17090.5	17553.6	17360.9	16312.1	16269	16367.6	10628	10662.2	10646.6	10629.6	10637.4	10640.8
695		46299.1	41900.4	43475.6	48368.5	48379.4	48292.2	10544	11110.7	9892.87	9840.7	10669.3	10732.7	8996.82	8611.59	9775.84	8213.54	6618.42	8050.95	9250.44	7474.97	6057.66	7564.36	8314.92	8070.78	5327.26	5327.26	5327.26	5327.26	5327.26	5327.26	5327.26	5327.26	5327.26	5327.26	5327.26	5327.26	12331.2	12503.2	12543.9	12472.9	12357.6	11948.1	3998.93	4013.93	4041.38	4021.03	3978.81	3987.85
696		31819.2	32310.9	33272.6	33021.8	32144.8	31750.4	47201.1	47382.9	47130.9	46927.5	46937.1	47013.1	50683.9	52733	52626.5	53758.6	53577.2	50827.5	50886.5	50734.3	51791.5	54604.9	52038.2	51743.7	31643.5	31643.5	31643.5	31643.5	31643.5	31643.5	31643.5	31643.5	31643.5	31643.5	31643.5	31643.5	18753.4	18471.3	18340.8	19250.1	20402.5	19677.8	7030.41	7012.73	7020.51	7057.38	7049.24	7038.32
697		44092.1	47120.8	49397.3	49806.8	51138.7	47050.6	24301.3	23624.5	26610.3	26427.9	24318.1	25499	43061.9	64394.3	31367.2	16773.4	18618.5	25211.4	21838.6	21525.5	17466.5	21916.5	30761	21158.8	11180.7	11180.7	11180.7	11180.7	11180.7	11180.7	11180.7	11180.7	11180.7	11180.7	11180.7	11180.7	6426.86	6416.04	6383.53	6411.12	6387.4	6087.9	10924.4	10961.2	10988	10968.1	10932.3	10930.7
698		41801.5	41428.7	41942	43511.7	43425.3	41179.5	11171.5	11335.2	11035	11263.2	11707.1	11925.3	14006.2	10388.4	11267.6	11441	9420.11	9421.32	9771.52	11505.8	10252.5	11563.5	10797.2	8146.47	5962.98	5962.98	5962.98	5962.98	5962.98	5962.98	5962.98	5962.98	5962.98	5962.98	5962.98	5962.98	15057.6	15023.2	14434.8	14240.3	14347.8	14294.2	10186.4	10192.5	10208.5	10221.2	10211	10197.5
699		38226.5	41072.4	47465.8	49016.1	52369.6	49719	1227.91	1152.65	1189.54	1226.52	1064.67	1069.57	1002.68	1135.38	824.498	718.911	938.93	1150.32	1192.32	1008.89	1232.1	1331.97	1051.86	1269.54	881.4	881.4	881.4	881.4	881.4	881.4	881.4	881.4	881.4	881.4	881.4	881.4	13745.9	13786.1	13101.2	12864.1	13109.3	12863	8003.39	8010.64	8009.65	8003.49	8010.64	8025.87
700		66685.5	62629.4	62575.9	66526.6	63207.7	61473.6	374.467	379.725	380.08	399.404	396.789	393.682	408.146	365.987	396.032	398.546	410.015	437.706	407.65	378.913	423.315	468.854	422.681	414.204	257.707	257.707	257.707	257.707	257.707	257.707	257.707	257.707	257.707	257.707	257.707	257.707	19087.5	19778.1	19649.4	20053.5	21774.4	20365.1	9325.74	9350.31	9335.23	9291.81	9335.35	9359.53
701		35309.6	36027.9	35690	39535.8	46202.1	40904.1	57826.2	57875.8	55759.7	57786.1	60905.2	59850.3	53735.4	46573	45796.3	48259.5	49998.2	31135.8	32909.7	53129.9	38811.6	48401.8	51444.3	32706.6	23504.3	23504.3	23504.3	23504.3	23504.3	23504.3	23504.3	23504.3	23504.3	23504.3	23504.3	23504.3	15692.4	15356.5	14646	14708.9	15124.7	15511.6	8289.59	8271.99	8284.52	8292.82	8304.73	8301.62
702		28864.9	28864.9	28864.9	28864.9	28864.9	28864.9	40922.6	40922.6	40922.6	40922.6	40922.6	40922.6	15259.3	15259.3	15259.3	15259.3	15259.3	15259.3	15259.3	15259.3	15259.3	15259.3	15259.3	15259.3	10635.2	10635.2	10635.2	10635.2	10635.2	10635.2	10635.2	10635.2	10635.2	10635.2	10635.2	10635.2	15635	15446.4	15355.5	15492	15406.9	15292.2	4493.84	4493.35	4500.35	4501.87	4496.33	4499.57
703		43525.8	42597.6	43128.7	45491.2	42545	39778.2	18413.7	19064.4	21757.5	20259.1	20120.2	22570.5	25596.3	20348.3	18995.9	17954.4	15418	11355.6	13048.4	18681.2	15345.1	15753.7	18460	15422.5	8256.58	8256.58	8256.58	8256.58	8256.58	8256.58	8256.58	8256.58	8256.58	8256.58	8256.58	8256.58	16785.9	16729.2	16713	16748.4	16773	16573.1	8811.25	8826.02	8818.14	8807.61	8815.67	8815.31
704		19860.2	21511.4	22920	20572.1	21759.4	23706.1	16715.3	14997.4	13864.3	14794.7	15008.6	15730.8	13379.3	17981.8	19411.2	16651	22564.2	20590.6	17688.2	16251.3	14767.5	16024.6	15834.8	11406.9	4427.3	4427.3	4427.3	4427.3	4427.3	4427.3	4427.3	4427.3	4427.3	4427.3	4427.3	4427.3	7905	7808.46	7940.74	7771.32	8037.48	8892.23	6192.41	6175.18	6146.76	6141.02	6152.79	6152.88
705		50155.8	50167.2	50374.8	50583.3	50531.6	50496.3	21538	21443.2	21414.9	21519.8	21697.6	21611.3	26273.8	26434.4	26900.9	26952.4	26714.7	26643.8	26421.1	26760.6	26834.9	26485.3	26789.8	26839.4	15516.5	15516.5	15516.5	15516.5	15516.5	15516.5	15516.5	15516.5	15516.5	15516.5	15516.5	15516.5	12470.6	12010.3	11977.9	12318.2	11840.8	11981.5	5901.21	5920.36	5904.19	5884.9	5898.44	5891.26
706		53291.9	51567.3	55225.4	56558.2	50558.7	55475.2	44714.5	40570.9	41049.7	41634.3	43065.9	44443.1	42754.5	41304.2	38488.3	45831.7	43214.4	39914.5	44218.5	39934.2	38895.2	39300	40457.7	52274.6	31905.5	31905.5	31905.5	31905.5	31905.5	31905.5	31905.5	31905.5	31905.5	31905.5	31905.5	31905.5	14280.1	14430.3	15728.1	15515	14793.8	15674.9	6167.76	6166.7	6138.75	6149.51	6141.35	6121.29
707		46036.7	45842.1	43176.4	42437.9	39908.6	40879.8	49182.7	46162.2	43431.5	44531.1	48565.1	50182.8	29686.4	28826.9	28579	22867	19517.9	30989.5	37518.7	30426.1	36055.1	30518.5	26583.6	24258.8	15910.9	15910.9	15910.9	15910.9	15910.9	15910.9	15910.9	15910.9	15910.9	15910.9	15910.9	15910.9	12367.9	12366	12691.6	12914.6	13016.3	13089	7478.45	7486.77	7498.48	7497.45	7478.51	7484.1
708		24318	25750.9	27044.1	26722	28141.6	28611.8	32689.6	30597.8	30129.4	29793.7	32772.3	34775.2	22437	18180.3	15127.3	16904.5	15131.6	16979.1	27733.3	29001.2	24007.8	19063.7	22144.3	18963.3	11327.7	11327.7	11327.7	11327.7	11327.7	11327.7	11327.7	11327.7	11327.7	11327.7	11327.7	11327.7	15705.7	15718.1	14921.1	14850	15384.1	14976.4	10958.6	10971	10946.7	10946.2	10947.4	10953
709		44644.8	49920.7	56854	52616.2	49377.2	52399.1	17311.6	16475.6	14991.8	15593.6	15285	14617	15694.7	18022.2	10883.2	6465.47	6112.71	7111.1	8615.95	9239.22	9233.21	7136.31	8562.71	16711.8	9012.83	9012.83	9012.83	9012.83	9012.83	9012.83	9012.83	9012.83	9012.83	9012.83	9012.83	9012.83	15544.2	15556.2	15543.5	15398.1	14428.2	14900.7	9039.37	9017.06	9037.86	9028.45	9044.78	9052.68
710		24761.7	26401.9	29770.1	31118.1	29996.1	28350.5	14736.6	13941.5	13088.5	14328	14219.4	12985.3	6923.73	5924.85	6883.75	9987.26	13339.9	12748.9	8149.41	7347.39	8401.45	13117.2	12241.1	6159.69	4969.72	4969.72	4969.72	4969.72	4969.72	4969.72	4969.72	4969.72	4969.72	4969.72	4969.72	4969.72	11395.4	11034	11141.4	12424.8	12661.5	11580.3	8528.06	8533.21	8591.57	8598.77	8591.38	8578.14
711		36479.8	37541.3	39235.3	36203.8	36274.4	42589.7	54068.1	50153.9	50038.8	51610.3	49742.9	48302.9	40091.2	46831.7	62277.3	60983.6	53468.9	38681.8	39370.8	35906.6	33298.8	37649.8	41366.7	48091.5	24918.6	24918.6	24918.6	24918.6	24918.6	24918.6	24918.6	24918.6	24918.6	24918.6	24918.6	24918.6	15293.8	15296.4	15209.4	15257.4	15212.2	15136.4	5822.52	5822.49	5824.91	5822.93	5819.79	5818.54
712		58605.2	58306.8	54506.2	54820	48547.8	50273.2	8323.7	7737.93	7988.54	7491.09	6656.68	7352.32	6058.38	5646.47	3757.48	4196.97	6337.2	6491.64	6680.17	5313.32	4793.61	3824.73	3502.66	5477.71	4731.38	4731.38	4731.38	4731.38	4731.38	4731.38	4731.38	4731.38	4731.38	4731.38	4731.38	4731.38	17531.9	16954.3	17474.2	17473.1	16991.2	16749.1	9178.9	9248.5	9265.34	9222.18	9236.89	9265.69
713		28969.6	31299.2	35740.8	31540.4	29132.5	32726.1	20269.5	19609.9	19260.4	20066.6	19653.6	18850.4	15663.6	14204.8	19141.9	23293.1	12572.4	10879.2	16870.9	15917.8	13360.4	18890.6	16995.6	10958.7	7462.97	7462.97	7462.97	7462.97	7462.97	7462.97	7462.97	7462.97	7462.97	7462.97	7462.97	7462.97	8357.23	8393.82	8395.8	8387	8413.61	8401.58	9371.81	9368.3	9373.9	9378.7	9375.6	9366.07
714		56888.4	56331.1	58560	63175.3	63378.2	59652.9	26526.4	26999.4	26528.9	25769.7	25250.1	25672.8	25585.6	22167.7	19271.4	21308.4	24862	25259.7	22971.5	20797.5	19822.6	23005.4	24097.2	22571.7	17469.1	17469.1	17469.1	17469.1	17469.1	17469.1	17469.1	17469.1	17469.1	17469.1	17469.1	17469.1	20934.2	21092.7	20799	20358.4	20919.5	21490.2	5552.95	5546.31	5538.36	5540.18	5544.14	5540.26
715		28251.2	28501.8	32233.6	32605.3	28011.7	28254	9381.55	9154.39	9175.96	9930.55	9855.96	9258.25	7653.25	6884.81	5538.38	6905.28	7713.29	7327.43	7951.95	8268.9	10413	9293.53	5732.62	6559.66	4224.82	4224.82	4224.82	4224.82	4224.82	4224.82	4224.82	4224.82	4224.82	4224.82	4224.82	4224.82	5780.63	5347.43	5217	5539.11	5491.94	5636.36	8196.11	8185.11	8246.42	8274.49	8252.56	8221.52
716		39061.4	39061.4	39061.4	39061.4	39061.4	39061.4	11925.5	11925.5	11925.5	11925.5	11925.5	11925.5	4446.8	4446.8	4446.8	4446.8	4446.8	4446.8	4446.8	4446.8	4446.8	4446.8	4446.8	4446.8	3099.28	3099.28	3099.28	3099.28	3099.28	3099.28	3099.28	3099.28	3099.28	3099.28	3099.28	3099.28	21369.1	20208.3	22139.4	25085.3	22553.2	21401.5	12552.9	12580.8	12551.8	12572.2	12610.2	12530.7
717		65405.3	64737.3	61980.3	60092.2	62269	65097.9	28983.6	29513.8	30356.1	29321.2	28935.8	28754.5	31651.3	30640	29141.9	32232.3	33158.5	34037.3	31834.2	31295.4	33428.2	33007	31364.2	37767.9	18422.7	18422.7	18422.7	18422.7	18422.7	18422.7	18422.7	18422.7	18422.7	18422.7	18422.7	18422.7	19072.2	19507.7	21206.1	21582.9	20204.4	19414.2	12456	12442.9	12449.5	12474.2	12461	12432.8
718		35966	35440.8	35465.1	36155.4	36631.1	37228.8	18131.9	17869.5	17984.4	17751.1	17959.4	18404.2	19540.6	19286.6	20910.4	19603	17832.7	17868.5	18511.4	18081	18370.5	22872.9	22763.8	19488.8	11894.4	11894.4	11894.4	11894.4	11894.4	11894.4	11894.4	11894.4	11894.4	11894.4	11894.4	11894.4	20283.6	20025.9	20388.5	19974.6	18934	18970.3	5784.25	5799.78	5773.24	5777.44	5802.25	5807.46
719		56604.8	58358.6	56858.8	54942.6	53803.8	53078	20574.9	20743.5	20249.5	20008.9	20204	20522.9	22316.6	20393.1	20733.6	21485.6	23025.1	26226.1	19934	20448.2	24079.7	22276.7	20534.8	21261.5	12639.3	12639.3	12639.3	12639.3	12639.3	12639.3	12639.3	12639.3	12639.3	12639.3	12639.3	12639.3	17180.8	16334.3	15592.7	17361.4	16482.4	14328.6	13482.4	13571.8	13572.1	13511.5	13574	13554.3
720		48255.4	48516.2	45955.2	45181.1	49062.1	53220	3540.35	3328.59	3248.36	3186.53	3053.04	2949.12	1929.04	2316.14	2272.16	2366.46	2405.53	2440.23	2983.79	2723.74	2784.53	4362.22	3033.71	2220.24	2116.24	2116.24	2116.24	2116.24	2116.24	2116.24	2116.24	2116.24	2116.24	2116.24	2116.24	2116.24	15859.9	16607.5	17099.8	17043.9	17191.5	16901	11764.8	11733.2	11739.7	11735	11774.5	11803.5
721		22111.8	22122.4	22234.4	22180	22178.5	22248.5	10405.6	10430.8	10491.3	10472.1	10451.7	10436.5	12713.2	12819.6	12846.6	12789.3	12739.5	12784.3	12773.1	12772.1	12696	12701.8	12708.2	12686.4	7547.63	7547.63	7547.63	7547.63	7547.63	7547.63	7547.63	7547.63	7547.63	7547.63	7547.63	7547.63	20886.9	21425.6	22158.1	21487.7	20676.7	21417.8	7499.01	7497.88	7524.53	7489.5	7483.52	7513.43
722		34697.2	36529.5	36004.3	29992.3	28956.8	32455.4	12769.5	12758.3	12782.4	12130.8	12490	13679.7	10711.8	7315.08	7458.36	14112	21969.5	13839.4	7215.32	7129.95	10195.5	9554.52	6564.11	11335.3	7227.45	7227.45	7227.45	7227.45	7227.45	7227.45	7227.45	7227.45	7227.45	7227.45	7227.45	7227.45	11188.9	11254.7	10868.1	10360	10423.5	10663	8607.93	8605.8	8595.63	8603.57	8578.88	8576.24
723		37795.6	39419.9	41739.9	40189.2	42171.5	41881.3	5087.97	5045.06	5009.58	5200.6	5191.05	5365.89	4036.13	2706.09	2691.22	2185.26	1988.2	3249.67	4515.26	2896.31	2787.4	3508.1	3118.35	3763.41	1936.66	1936.66	1936.66	1936.66	1936.66	1936.66	1936.66	1936.66	1936.66	1936.66	1936.66	1936.66	17167	15885.6	17516	19453.2	17382.2	16900.7	14818	14867.2	14794.6	14780.5	14881	14941.4
724		28528.5	30197.9	30572.7	28792.9	31393.2	32061.3	47044	43952	45057.4	49079.8	49332.8	50364.3	55849.6	46053.2	46402.8	43213.2	42162.9	48777	49198.9	50083.5	53162.5	60392.1	53424.7	44479.8	32084.3	32084.3	32084.3	32084.3	32084.3	32084.3	32084.3	32084.3	32084.3	32084.3	32084.3	32084.3	11913	11850.7	11388.1	11441.9	11684.1	11505.8	2782.19	2787.26	2787.82	2783.4	2784.47	2786.94
725		35380.4	35722.3	39164.4	37859.8	36197.4	36829.3	3094.98	3318.77	3247.01	3093.26	3095.86	3034.62	2967.39	3102.54	3090.91	2703.62	2516.22	2980.15	3542.13	3581.38	3199.05	3520.51	3538.17	2933.12	1634.79	1634.79	1634.79	1634.79	1634.79	1634.79	1634.79	1634.79	1634.79	1634.79	1634.79	1634.79	8718.16	9249.55	8850.88	8239.1	9135.73	9042.73	12028.9	12095.3	12080.2	12045.3	12052.5	12068.6
726		42351.7	40616.2	46095.6	49947.9	38680.9	36056.5	31783.8	33404.5	31638.5	31101.7	28610.1	27371.9	25332.5	24027	20909.9	27291.4	17390.8	19156.6	35880.9	27850.1	17176.8	19907.6	27480.3	30214.5	16407.1	16407.1	16407.1	16407.1	16407.1	16407.1	16407.1	16407.1	16407.1	16407.1	16407.1	16407.1	22601.8	23071.7	21598.8	21892.3	24598.5	21598.8	5330.95	5365.36	5317.77	5303.12	5348.66	5371.14
727		59488.6	56552.2	57621.9	64490.9	60878.3	57637.7	18379.4	18624.3	18106.1	17174.4	17912.8	18800.7	17531.4	17895.3	18295.1	18090.1	21087.3	18741	14718.8	16692.5	19343.9	17982.8	17095.4	14557.6	8558.72	8558.72	8558.72	8558.72	8558.72	8558.72	8558.72	8558.72	8558.72	8558.72	8558.72	8558.72	7955.24	8187.53	7992.45	8041.16	8524.6	8179.34	6095.66	6117.44	6125.21	6101.71	6078.24	6074.54
728		32809.1	32809.1	32809.1	32809.1	32809.1	32809.1	31482.5	31482.5	31482.5	31482.5	31482.5	31482.5	11739.2	11739.2	11739.2	11739.2	11739.2	11739.2	11739.2	11739.2	11739.2	11739.2	11739.2	11739.2	8181.89	8181.89	8181.89	8181.89	8181.89	8181.89	8181.89	8181.89	8181.89	8181.89	8181.89	8181.89	14572.4	14572.4	14572.4	14572.4	14572.4	14572.4	12088.1	12088.1	12088.1	12088.1	12088.1	12088.1
729		51145.1	56148.5	64994.7	60048.2	54141.2	52143.1	35154.7	38508.2	41561.5	38481.5	35081.9	34924.9	18977.1	20879.1	26991	37013.2	26931.7	18881	25805.9	40680.3	49601.2	28544.4	26084.4	22414.6	10983.9	10983.9	10983.9	10983.9	10983.9	10983.9	10983.9	10983.9	10983.9	10983.9	10983.9	10983.9	10977.7	11049.3	11089.2	10783.6	10271.7	10846.2	11182.5	11173.9	11083.8	11070.1	11121.5	11095.8
730		34147.1	32590.5	31458.8	31866.8	29841.2	29713.2	24167.3	24692.1	24838.2	24695	23792.8	23373.6	21791.2	21963.6	25097.3	30863.9	27250.8	24036.9	26363.6	24383.1	23772	24067.5	26125.6	27134.1	14582.3	14582.3	14582.3	14582.3	14582.3	14582.3	14582.3	14582.3	14582.3	14582.3	14582.3	14582.3	12624.2	12514.8	12666.9	12550.1	12580.2	12822.8	6335.59	6331.27	6344.01	6361.26	6363.82	6359.17
731		19532.9	19583.6	20255.8	20258.5	19299	19941.3	15782	15526.7	16313	16372	15746.2	15785.4	18082.6	15998.6	14921.5	16529.6	16667.4	15861.1	16743.9	18816.4	17895.4	14814.7	16419.6	18620.6	9162.08	9162.08	9162.08	9162.08	9162.08	9162.08	9162.08	9162.08	9162.08	9162.08	9162.08	9162.08	19184.8	20274.5	22530.6	21858.4	21037	20280.2	5435.08	5452.27	5472.4	5485.49	5484.07	5446.39
732		47549.5	48173.5	50552.5	46709.3	42739.6	44927.2	7605.8	7743.6	7694.78	7437.61	7233.33	7099.18	4986.78	5648.63	5214.82	5889.81	4974.23	4581.54	4847.63	6569.77	6003.3	4485.88	6009.73	6405.17	5069.1	5069.1	5069.1	5069.1	5069.1	5069.1	5069.1	5069.1	5069.1	5069.1	5069.1	5069.1	18608.5	18608.1	16024.2	14991.6	16372.4	17154.3	10080.6	10124.6	10138.2	10025.2	10049.4	10120.6
733		46142.3	45368.7	41667.3	44659.6	50737.6	55569.7	26537.9	24789.1	22625.5	22123.6	24748.6	23840.7	15511.2	11672.3	8260.85	11086.7	17216.8	15633.2	15126.5	13019.6	15875.4	17219.5	13216	14747	10267.4	10267.4	10267.4	10267.4	10267.4	10267.4	10267.4	10267.4	10267.4	10267.4	10267.4	10267.4	17001.2	16237.1	15302.7	16829.4	19396.6	17834.6	7763.68	7794.85	7772.51	7775.13	7769	7776.02
734		40446.9	43877.7	46825.7	44741.4	45405	45523.9	57603	58006.6	52992.3	52184.7	53602.5	53987.5	43124.2	38183.5	36490.5	41270.7	47689.2	42515.4	43457.6	50734.5	48779.4	53450.4	50640.4	36980.2	24151.7	24151.7	24151.7	24151.7	24151.7	24151.7	24151.7	24151.7	24151.7	24151.7	24151.7	24151.7	13101.2	13294.4	13547.1	13785.1	13842.8	13210.9	8637.44	8646.35	8641.65	8631.98	8648.8	8665
735		37824.7	35359.3	38219.4	42968.7	41762.9	39556	28417.5	28252.2	28755.5	29034.9	28589.4	29553.5	17387.6	17189.3	13888.6	12046.8	16562.9	21355.7	22885.2	21928	20035.6	15724.5	15311.3	15506.3	8027.3	8027.3	8027.3	8027.3	8027.3	8027.3	8027.3	8027.3	8027.3	8027.3	8027.3	8027.3	13243.4	13281	13146.1	13395	14035.8	13729.5	5736.51	5731.98	5734.03	5742.61	5756.75	5761.61
736		45100.6	44197.7	43190	43032.4	40431.9	39304.6	21963.6	22055	22623.9	23748.1	24226.5	23631.5	13727.9	12966.6	10753.4	10314.6	9771.72	11613.6	13619.5	9775.72	8835.91	13187.9	14590	12523.8	7646.39	7646.39	7646.39	7646.39	7646.39	7646.39	7646.39	7646.39	7646.39	7646.39	7646.39	7646.39	9768.27	9895.13	10143.8	9859.11	9817.56	10079.3	6646.93	6647.94	6649.4	6641.17	6634.95	6641.81
737		24415.5	25140.9	25151.4	24566.7	25317.9	24451.7	6708.27	6781.66	6867.1	6905.91	6677.87	6624.9	3372.64	4190.87	4514.85	4186.69	2948.4	2751.8	3062.79	3335.57	3504.14	3006.19	2666.27	3000.49	2468.4	2468.4	2468.4	2468.4	2468.4	2468.4	2468.4	2468.4	2468.4	2468.4	2468.4	2468.4	8006.65	7975.63	8099.35	8197.74	8030.11	7794.13	11484.7	11504.1	11497	11504.6	11514.4	11502.1
738		10973.6	10915.1	11385	11531.5	11109.3	11120.5	31862.7	33169.7	32967.6	31530.5	31173.9	31181.3	18580.2	24092.7	17788.5	14395.3	16934.8	17747.6	16005.6	14105.5	14159.7	19543.5	26981.2	19662	11231.7	11231.7	11231.7	11231.7	11231.7	11231.7	11231.7	11231.7	11231.7	11231.7	11231.7	11231.7	16864.5	17002.9	17671.6	17823.5	18074.7	16851	14224.3	14281.4	14283	14302.5	14316.8	14318.4
739		39397.2	40885.7	41251.8	38794.9	41292.2	44214.3	40237.4	40768	40469.5	38847	39875.5	38770.3	35909.1	36969.3	39874.1	40532	37246.3	41120.2	41990.5	39393	39189	37203.6	36418.3	42715.7	26236.3	26236.3	26236.3	26236.3	26236.3	26236.3	26236.3	26236.3	26236.3	26236.3	26236.3	26236.3	22227.9	22439.6	21248.4	19883.2	20510.6	19401	6464.42	6524.41	6505.68	6506.65	6530.01	6518.93
740		31653	32722.4	31885.9	31527.5	35794.9	33782.5	20914.9	21084.4	20756.9	20915	19952.7	18843.6	9260.22	10691.9	13817.4	15624.6	17948.2	16202.6	13724.2	13107.4	13323.5	12431	12550.4	19838.3	10296.8	10296.8	10296.8	10296.8	10296.8	10296.8	10296.8	10296.8	10296.8	10296.8	10296.8	10296.8	13752.2	13236.2	13659.8	14354.5	15594.6	15409.1	4457.15	4477.56	4499.97	4470.66	4459.13	4493.86
741		39978.9	37043.2	32929	36260.2	42769.3	40670.8	14843.6	15028.1	14229.8	13600.4	13972.1	15896.1	14225.9	10982.9	14304.4	11454.2	10697.1	9467.5	9201.83	11648.4	9954.83	10982.5	14012.9	12205.3	5018.94	5018.94	5018.94	5018.94	5018.94	5018.94	5018.94	5018.94	5018.94	5018.94	5018.94	5018.94	17532.6	17979.7	18639.6	18407.8	17689	18703.8	6746.04	6725.28	6738.84	6686.25	6698.21	6763.6
742		34551.8	34572.4	34615.8	34746.9	34957	34727.5	8544.93	8569.78	8469.4	8500.88	8575.94	8511.54	3406.18	3489.9	3429.01	3377.39	3386.69	3433.37	3389.47	3371.08	3381.66	3304.57	3274.57	3452.71	2289.1	2289.1	2289.1	2289.1	2289.1	2289.1	2289.1	2289.1	2289.1	2289.1	2289.1	2289.1	16952.1	18413	19153.4	16783.8	16399	17857.2	3941.77	3925.7	3929.58	3946.46	3956.09	3932.51
743		54082.2	53443.6	54698.4	56400.4	55295.5	54262.5	2108.34	2087.12	2103.18	2116.88	2055.93	2095.87	2290.11	2116.29	2141.51	2238.44	2162.08	2313.52	2272.73	2097.68	2330.37	2525.73	2467.35	2235	1261.39	1261.39	1261.39	1261.39	1261.39	1261.39	1261.39	1261.39	1261.39	1261.39	1261.39	1261.39	14629.8	14685.5	15621.5	17170.3	17714	16069	14171.9	14203.4	14115.9	14113.6	14198	14139.3
744		56750.4	52758.6	49326.8	51814.8	49744.2	52346.6	16973.3	16190.1	15886.1	16398.6	16606.9	16252.1	13590.3	12852.7	12615.4	13513.2	16343.8	13425.7	11425.6	14342.2	17122.6	16605.8	18834.6	20576	9054	9054	9054	9054	9054	9054	9054	9054	9054	9054	9054	9054	20911.1	19558.5	18471.3	20303.4	20212.2	19872	10301.3	10292.6	10243.9	10217	10274.3	10274.5
745		40692	37755.7	34344.4	41019.4	42432.4	34958.2	42471.2	45285.7	44409.8	42565.5	42560.7	39782.1	15300.2	18882.4	27576.5	47858.4	47896	36870.3	36563.8	35386.4	30541.5	26617.8	24446.1	20700	11026.3	11026.3	11026.3	11026.3	11026.3	11026.3	11026.3	11026.3	11026.3	11026.3	11026.3	11026.3	18859.3	18855.8	18895.1	18870.7	18853	18843.8	5475.97	5477.73	5478.99	5480.25	5480.34	5478.51
746		20151.5	19798	20210.8	19729.8	20165.6	21119.7	37021.9	37140.6	35941.6	36064.6	36347.5	35177.4	17494.8	18569.5	18649.2	22872.8	32151	27466.5	18170.3	22094.6	22652.4	25634.4	21483.2	16267.4	11489	11489	11489	11489	11489	11489	11489	11489	11489	11489	11489	11489	16471	16089.9	15044.9	15574.1	15817	15647.8	12972.6	12932.7	12881.9	12911.7	12959.2	12915
747		57653.3	54469.2	45383.1	49780.6	53076.4	48034.1	11251.4	11502.8	10710.6	10667.4	11729.7	12272.2	9776.12	8571.82	8394.42	5202.96	5171.6	6801.7	9619.25	8037.26	4510.7	7459.97	9902.85	7955.35	3263.38	3263.38	3263.38	3263.38	3263.38	3263.38	3263.38	3263.38	3263.38	3263.38	3263.38	3263.38	3466.2	3509.03	3337.21	3332.72	3401.55	3297.39	5779.77	5763.26	5769.77	5798.15	5794.48	5764.34
748		41337.6	42535.7	42861.7	44198.6	44281.3	42020.3	9418.57	8900.68	8597.64	8521.07	8651.33	8943.38	6254.19	9231.83	8701.28	6271.94	4834.8	5775.64	6076.24	6970.6	7324.2	4336.87	5336.52	5723.79	3018.37	3018.37	3018.37	3018.37	3018.37	3018.37	3018.37	3018.37	3018.37	3018.37	3018.37	3018.37	15162.9	14543.2	14089.4	14582.2	15664.7	14247.5	8840.79	8949.98	8957.68	8902.16	8864.93	8870.89
749		25331.3	26948.5	25438.4	22916.9	22702.1	24019.3	3644.41	3430.65	3307.8	3132.38	3383.81	3680.52	2860.1	3134.66	2383.92	1743.08	2943.15	3558.06	1970.41	2611.53	3102.66	1954.21	2040.48	2507.57	1535.33	1535.33	1535.33	1535.33	1535.33	1535.33	1535.33	1535.33	1535.33	1535.33	1535.33	1535.33	11487	11360.5	10650.5	11106.9	11430.2	10605.8	8013.04	8034.48	8000.24	7986.35	8014.98	8010.84
750		37154	35912.7	35175.4	40771.7	41680	33882.5	383.772	412.677	379.098	372.392	398.377	407.043	294.165	219.453	274.85	186.502	144.131	208.819	145.02	257.419	544.128	339.213	366.416	496.889	219.832	219.832	219.832	219.832	219.832	219.832	219.832	219.832	219.832	219.832	219.832	219.832	17250.7	16809.7	15044.9	14641.3	16304	16739.2	11171.7	11153.9	11153.6	11186.2	11190.6	11190.3
751		27331.4	29138.8	34967.8	34811.6	30318.7	27869.9	30204	31420.1	30694.4	31138.4	33760.3	33225.3	28844.3	38450.7	36646.5	23439.6	20058.3	22359.9	29912.4	33318	35146.5	21780.8	17514.5	22329.9	21103.4	21103.4	21103.4	21103.4	21103.4	21103.4	21103.4	21103.4	21103.4	21103.4	21103.4	21103.4	11950.1	11999.2	12041.4	11995.1	12023.5	12047.3	6142.48	6143.23	6145.46	6144.38	6141.2	6141.03
752		25847.8	24265.4	25019.7	27763.5	25664	23800.8	13522.2	13214	13979.8	15136.9	14191.7	13711.4	10929	8502.75	6336.46	8059.43	6862.53	7210.86	7052.84	8617.56	8479.68	7728.11	7163.43	5396.4	3915.76	3915.76	3915.76	3915.76	3915.76	3915.76	3915.76	3915.76	3915.76	3915.76	3915.76	3915.76	20271	22150.5	21942.7	21784.9	23468.2	21794.9	10101.1	10061	10096.1	10135.5	10107.3	10099.2
753		29856.1	30145.8	30672	30888.8	28038.8	28338	23185.6	22460.9	22696.3	22945.5	22349.9	21978.7	21101.2	20715.4	24080.9	26235.9	21256.7	19890.1	22587.6	24860.4	22575.3	22169.6	25576.7	26132.9	12228.5	12228.5	12228.5	12228.5	12228.5	12228.5	12228.5	12228.5	12228.5	12228.5	12228.5	12228.5	18899.3	19545.4	19547.7	18465.7	18812	19916.2	3800.96	3787.39	3800.91	3794.8	3784.2	3805.38
754		56156.3	52906.8	47748.2	50017.5	54900.2	53424.8	36956	37658.6	34792.7	33908.7	35344	35616.2	35350	38481	44261.4	41418	38068	38886.8	37199.6	38541.3	35251.2	33434.1	36340.3	36519.6	24190.5	24190.5	24190.5	24190.5	24190.5	24190.5	24190.5	24190.5	24190.5	24190.5	24190.5	24190.5	17472.5	17673.2	17781.3	17795.7	17676.9	16976.2	11491.7	11518.3	11546.9	11516.2	11502.7	11537.9
755		34632.1	34624.5	34665.6	34681.9	34735.5	34732.7	33686.9	33704.5	33745.2	33828.7	33771.6	33672.6	40312.4	40315	40328.6	40370.9	40194.5	40111.4	40093.8	40133.3	40278.7	40348.3	40244	40118	23739.1	23739.1	23739.1	23739.1	23739.1	23739.1	23739.1	23739.1	23739.1	23739.1	23739.1	23739.1	18497.3	18918.3	19150.8	18664.9	18534.1	20149.8	5550.59	5521.81	5509.95	5491.18	5513.64	5513.16
756		55940	48925.3	41491.3	43527.9	47552	51318.4	35493.8	36614.7	32917	30466.6	33800.7	33477.1	22262.6	26196.3	23058	24609	21726.9	23712.6	21310.1	17086.1	18595.4	20959.5	23823.7	34894.9	19740.8	19740.8	19740.8	19740.8	19740.8	19740.8	19740.8	19740.8	19740.8	19740.8	19740.8	19740.8	13746.8	14008.8	13864.1	13707	14554.7	14303.4	5047.02	5046.19	5058.88	5057.18	5064.98	5063.02
757		66898.2	63365.7	59756.2	60704.5	61511.8	60998.5	52895.2	57653.2	55022.6	51896.2	50581.9	49804.3	39382.6	48295.7	73847.5	54272.8	46514.4	58703.8	55048.6	51674.3	59300.7	58402.2	49597	43855.8	27604.2	27604.2	27604.2	27604.2	27604.2	27604.2	27604.2	27604.2	27604.2	27604.2	27604.2	27604.2	1933.95	1905.88	1816.01	1819.98	1871.92	1861.23	12000.3	12021.8	12049.1	12041.3	11996.1	11987.6
758		47917.8	44922	39559	41020.9	41044.1	39604.2	38477	38203.7	40408.1	40952.6	41579.9	43860.2	32916.4	23850	26207.2	26308.1	21297.5	25782.8	28462.1	25457.4	24160.5	30150.6	40002.2	34957.5	14475.2	14475.2	14475.2	14475.2	14475.2	14475.2	14475.2	14475.2	14475.2	14475.2	14475.2	14475.2	14727	14700	14639.9	14409.2	14605.1	14336.4	3887.05	3905.89	3910.78	3908.75	3910.62	3896.09
759		46440.9	46712	47664.3	46162.8	45996.3	48204.6	14662.6	14418.7	14239.2	14195.3	14167.6	14373.9	15369.4	15138.7	15713.2	16169.5	17304.3	16935.4	15544.6	15655.2	15572.9	15492.9	15888.2	17361.2	11444.9	11444.9	11444.9	11444.9	11444.9	11444.9	11444.9	11444.9	11444.9	11444.9	11444.9	11444.9	12672.8	12972.6	12630.1	12287.1	12559.1	12659.9	6227.55	6210.77	6212.39	6203.16	6198.62	6206.47
760		40942.6	41226.3	40874.3	41007.3	39763	41302	47151.8	45319.8	45845.3	42831.6	42381.2	43830.1	42242.5	46894.8	44215.2	51904.9	45551.5	41530.2	57360.9	56656.1	40795	44257.2	41886.2	36726.7	24546.9	24546.9	24546.9	24546.9	24546.9	24546.9	24546.9	24546.9	24546.9	24546.9	24546.9	24546.9	21430.9	21620.5	22222.1	22256.9	22421.4	21981.2	4764.46	4768.7	4764.81	4774.3	4763.34	4749.93
761		46828.5	44501.3	43821.4	41098.3	39716	44935.1	25882.8	25550.6	23497.9	24678.1	26133.8	26571.1	23885.4	17905.9	17350.1	17852.9	19922.1	19907.6	18424.4	20376	24407.1	28660.9	28321.4	19539.4	16103.6	16103.6	16103.6	16103.6	16103.6	16103.6	16103.6	16103.6	16103.6	16103.6	16103.6	16103.6	7365.98	7321.18	6935.79	6577.38	6612.8	6925.41	5964.36	5961.71	5956.83	5964.32	5961.71	5965.11
762		52646	47339.2	51903.6	67597.9	57671.1	45706.8	6838.93	7284.55	7574.96	7726.42	7212.82	7340.14	7029.17	6572.39	4754.55	3493.72	3580.08	4483.75	5445.85	5834.32	4368.78	4710.48	5489.44	5902.58	2919.48	2919.48	2919.48	2919.48	2919.48	2919.48	2919.48	2919.48	2919.48	2919.48	2919.48	2919.48	6016.36	6087.74	6426.59	6537.85	6320.36	6271.01	11364.5	11393.3	11375	11331.4	11369.7	11373.7
763		40063.1	39584.3	39902.4	40354	40408.3	40177.5	8499.14	8593.11	8634.06	8571.75	8602.65	8610.02	3711.56	3918.75	4073.5	4003.59	4056.19	4089.48	3521.28	3686.68	3525.48	3508.65	3693.89	3897.5	2486.68	2486.68	2486.68	2486.68	2486.68	2486.68	2486.68	2486.68	2486.68	2486.68	2486.68	2486.68	8969.13	9003.74	8982.72	8825.98	8892.44	8963.98	13752.2	13754.3	13751.3	13760.5	13759.7	13753
764		15011.3	15770.9	14830.1	13373.7	15938	17194.6	49484.8	47352.7	45421.8	47467	47170.3	46809.3	41160.7	41481.5	30172.2	30902.7	29851.4	26752.5	30484.8	36229.4	55944.8	47049.1	39840.6	40671.9	23015.3	23015.3	23015.3	23015.3	23015.3	23015.3	23015.3	23015.3	23015.3	23015.3	23015.3	23015.3	6840.03	6825.65	6954.69	6469.39	5829.94	6359.36	10350.1	10343.3	10367.2	10374.2	10359.6	10359.3
765		25639.9	26355.4	27832.9	27248.3	29945.9	31946.5	4009.56	3784.1	4248.24	4247.32	4299.98	4209.97	1631.38	1428.58	1473.24	1778.39	2241.83	3414.02	2930.16	2263.38	3169.59	2548.14	2340.77	2629.11	1418.36	1418.36	1418.36	1418.36	1418.36	1418.36	1418.36	1418.36	1418.36	1418.36	1418.36	1418.36	19607.5	18725	18391.7	21209.1	21683.8	19934.2	13021.6	13053.3	13054.5	13011.2	12997.9	12988.7
766		35386.4	37187.9	43111.5	41403.1	40188.1	41914.8	63432.1	65976.5	63687.8	55272.5	58253.6	66074.4	31877.4	40987.5	68251.3	48410.9	34332.8	30037.1	44857.7	41609.6	30790.1	56720.6	67107.5	42435.9	21044.7	21044.7	21044.7	21044.7	21044.7	21044.7	21044.7	21044.7	21044.7	21044.7	21044.7	21044.7	14677.6	14610	14836.5	15029.4	14531.7	14657.7	8610.3	8599.63	8578.78	8579.44	8591.38	8586.56
767		24000.4	25599.2	24924.5	22997.9	25061.9	26622.4	41804.3	40504	37498.9	37388.7	37399.3	37793.6	36011.6	36833.3	38546.6	34948.7	33511.1	31638.9	31577.8	44000.3	36651.4	29668	35978.6	40869.6	21892.4	21892.4	21892.4	21892.4	21892.4	21892.4	21892.4	21892.4	21892.4	21892.4	21892.4	21892.4	12920.6	13145.8	12864	12564	12675.5	12812.9	5161.68	5152.41	5146.45	5151.63	5158.44	5162.53
768		53041.9	50884.5	51398.1	54799.8	59734.7	56684.8	34800.3	37850	36986.7	37685.2	35463.6	32387.5	18563.1	21523.5	31533.6	22778.9	17284.6	25350	37276.6	30165.1	29999.4	32281.5	28042.3	21646.7	14340.6	14340.6	14340.6	14340.6	14340.6	14340.6	14340.6	14340.6	14340.6	14340.6	14340.6	14340.6	18155.8	18476.8	18938	18356	18846.2	18117.5	12501.5	12508.6	12536.9	12572	12482.1	12537.7
769		51754.9	53930.2	50806.7	47555.4	48408.2	48365.7	48456.6	51595.7	52214.1	48407.9	50056.9	52143	61481.6	54709.8	43467.3	48532.8	45715.7	45329.8	39293.9	31993.8	36916.4	36366.9	34250.8	38610.4	20312.9	20312.9	20312.9	20312.9	20312.9	20312.9	20312.9	20312.9	20312.9	20312.9	20312.9	20312.9	12270.7	11626.2	10906.7	11531.5	11853.8	11150.5	6350.5	6374.11	6394.71	6402.96	6343.52	6340.04
770		26032.7	24727.6	25691.4	27994.7	29443	27032.5	58011.1	61538.9	62156	60019.9	67956.1	68960.2	37259	34094.1	37349.7	47671.3	37996.6	32434.2	40220.1	25722	24035.9	45742.7	28202.7	28614.7	30396.5	30396.5	30396.5	30396.5	30396.5	30396.5	30396.5	30396.5	30396.5	30396.5	30396.5	30396.5	7680.47	7688.5	7700.44	7683.95	7682.44	7691.27	11704.9	11702.3	11700.9	11704	11705.7	11706
771		33678.6	32462.8	33905.9	34366.6	33652.8	35674.3	13359.5	13658.1	13138.5	11966.5	12673.4	13660.3	12665.4	9721.5	7293.13	8515.11	10449.9	8531.13	5419	6270.4	12300.5	11758	7989.9	7865.44	6110.69	6110.69	6110.69	6110.69	6110.69	6110.69	6110.69	6110.69	6110.69	6110.69	6110.69	6110.69	18329.3	18189.6	17114.6	17101.6	18395	16927.7	9932.1	10001	10046	10045.8	10044.4	10042.7
772		54369.4	53266.3	57777.7	59885.6	54769.1	55328.5	11372.5	11447.9	10761	10573.8	11611.5	11110.6	6871.88	8670.29	10087.7	9918.46	8309.13	7119.4	8786.08	9973.3	12253.3	12838.7	9682.57	9125.35	4239.9	4239.9	4239.9	4239.9	4239.9	4239.9	4239.9	4239.9	4239.9	4239.9	4239.9	4239.9	15729.5	15123.8	15090.1	15915.3	15125.3	14902.9	13678.6	13675.2	13665.6	13672.2	13653	13611
773		41866.4	43511	48035.8	48176.8	44905.3	47740.7	26466.9	24753.2	24515.9	26304.7	25756.4	23874	22333.2	24441.5	22094.8	22608.5	20711	18241.2	18760.2	16956.6	16367	15347.3	14915.2	25730.3	13154.7	13154.7	13154.7	13154.7	13154.7	13154.7	13154.7	13154.7	13154.7	13154.7	13154.7	13154.7	15461.3	15078.5	15288	15606.9	15085.1	15757.1	6674.61	6648.56	6640.7	6656.95	6685.8	6720.3
774		48167.1	49469.7	48085.8	47389.3	52552	52124.6	22453.7	22079.3	21828.1	22390.1	24617.2	23633.7	20946	22524.5	19773.9	21116.6	21551.2	20308	21118.9	24426	21013.7	20044.7	19253.4	17728.6	12254.2	12254.2	12254.2	12254.2	12254.2	12254.2	12254.2	12254.2	12254.2	12254.2	12254.2	12254.2	18228.6	18862.2	17834.8	17351.6	18214.3	17854.3	5721.89	5734.74	5761.91	5764.55	5759.5	5723.79
775		28684.8	28374.9	26257.8	24342.6	24063.2	27627.1	33022.4	28136.5	28607.8	31607	28658.4	27543.3	19328.7	31454.8	24246.7	27093.4	33327.7	25471.6	17153.2	15696.5	21116.6	28149.2	32052	34996	17843.6	17843.6	17843.6	17843.6	17843.6	17843.6	17843.6	17843.6	17843.6	17843.6	17843.6	17843.6	13161.6	13229.1	13316.8	13220.8	13318.5	13371.3	13175	13167	13166.4	13183.2	13183.2	13181.7
776		47944.5	49112.7	54786.1	57872.9	60186.7	60151.1	14241.1	14004.4	14537.8	14530.9	13566.1	13738.3	8364.6	8279.72	8419.34	7790.64	10821	9953.14	8889.18	9388.54	10531.6	9256.91	8422.01	12598.9	6427.45	6427.45	6427.45	6427.45	6427.45	6427.45	6427.45	6427.45	6427.45	6427.45	6427.45	6427.45	14403.3	14004.6	14689.2	15429.6	15860.9	16231	13208.8	13215.6	13183.1	13218.4	13183.5	13129
777		57620.6	65286.1	63044.6	50513.7	49932.2	49254.8	14814.4	15777.3	17355.9	18349.1	18511	17145.3	7653.6	8487.23	11110.2	11311	12811.8	10727.2	10955.6	15077.2	18888.6	13590.2	13385.8	15066.4	6864.55	6864.55	6864.55	6864.55	6864.55	6864.55	6864.55	6864.55	6864.55	6864.55	6864.55	6864.55	16619.1	17105.9	16476.2	16003.9	16355.9	16677.7	3930.79	3926.44	3938.29	3940.13	3922.64	3929.16
778		38857.6	38791.5	43071.8	46224.5	45618.5	46534.4	44306.4	39228.2	40467.7	44035.5	43439.6	42860.9	20495.2	26620.5	30434.3	20018.7	18485.9	21859.6	22567.5	29999.8	25365.9	25862.4	44076.4	28954.2	15328	15328	15328	15328	15328	15328	15328	15328	15328	15328	15328	15328	15184.4	15362.1	15321.3	15049.4	15006.6	15157.6	12169.6	12164.4	12167.1	12166.2	12162.2	12162
779		44245.4	45175.9	48854	49395.4	47487.8	46981.6	2958.74	3042.37	2927.94	2865.62	2821.84	2771.73	2697.88	2738.11	3063.82	2958.39	2603.07	2636.75	2882.6	3171.57	3021.26	2549.46	2647.52	2988.6	1637.41	1637.41	1637.41	1637.41	1637.41	1637.41	1637.41	1637.41	1637.41	1637.41	1637.41	1637.41	19332.1	19013.7	18612.2	19311.2	16990.5	15830.4	12877.5	12862.8	12993.1	13024.9	12976.7	13025.6
780		30928.1	30215.2	33246.5	33240.1	30844.1	33236.1	379.462	372.041	370.396	380.204	377.533	377.89	290.041	301.604	261.764	255.732	337.881	286.922	202.383	209.968	287.919	232.445	173.705	179.085	135.302	135.302	135.302	135.302	135.302	135.302	135.302	135.302	135.302	135.302	135.302	135.302	8949.41	9283.33	9469.57	9220.99	9179.77	9132.48	3275.71	3268.3	3271.82	3275.6	3273.54	3282.13
781		17314.2	17206.8	18025.1	21786.8	22178.8	20358.2	27325.1	24719.8	26225.3	27404.8	24916.4	25848.4	23607.8	25035.5	32958.4	18420.9	16593.2	23374.1	25741	26917.7	15588.1	12545.8	15181.3	17084.8	7833.95	7833.95	7833.95	7833.95	7833.95	7833.95	7833.95	7833.95	7833.95	7833.95	7833.95	7833.95	10002.8	9878	9763.87	9703.64	9669.41	9618.95	11567.1	11572.7	11580.9	11593.7	11590.4	11595
782		23889.6	23797.6	25516.8	26394.8	24676.6	23457.6	26069.6	26470.8	26180.2	25259.1	24573.2	25404	24515.1	27574.6	25865.5	27644.5	24147.7	22496.9	27393.2	28163.9	26176.7	24602.5	27622.6	26424	14611.4	14611.4	14611.4	14611.4	14611.4	14611.4	14611.4	14611.4	14611.4	14611.4	14611.4	14611.4	13798.5	13932.7	13827	13245.1	13488	14189.8	11600.2	11573.8	11538.5	11573.7	11591.8	11569.3
783		56323.4	58212.4	67271	63094.1	64479.5	71834.6	25915.3	24363.7	21870.1	23631.2	27949.6	28602.9	26617.5	13885.8	13242.7	14892.2	11904.4	18614	23452.9	16964.4	27389.3	24005	26376.5	23694.2	9329.24	9329.24	9329.24	9329.24	9329.24	9329.24	9329.24	9329.24	9329.24	9329.24	9329.24	9329.24	14401.6	14433.6	14466.2	14294.4	14782.5	14679.6	7143.14	7158	7143.89	7132.76	7126.29	7126.26
784		43679	43595.1	43323.4	43309.4	42236.7	43303	21717.4	21436.5	21537.1	21134.7	20919	20895.9	21020.2	21070.4	21884.7	23258.7	21823.9	22142.3	23149.1	21581.1	21160.8	22275.5	20913.7	21543.9	13675.7	13675.7	13675.7	13675.7	13675.7	13675.7	13675.7	13675.7	13675.7	13675.7	13675.7	13675.7	9603.01	9635.63	9834.76	9769.16	9557.92	9638.95	7080.63	7081.69	7088.31	7086.82	7083.97	7082.32
785		38133.6	35982.3	35066	38060.4	36642.6	34378.6	7704.57	7967.99	8005.94	7953.32	7633.34	7582.94	3762.2	4342.86	4597.76	4156.72	4468.48	5717.73	7087.25	5080.04	3870.98	5868.99	11020.6	5850.26	2122.63	2122.63	2122.63	2122.63	2122.63	2122.63	2122.63	2122.63	2122.63	2122.63	2122.63	2122.63	14031.6	14031.6	14031.6	14031.6	14031.6	14031.6	12035.2	12035.2	12035.2	12035.2	12035.2	12035.2
786		56133.1	54429.1	50349.5	52239.1	52071.5	43062.3	9349.66	10635.3	11394	10609.1	10560.3	11237.8	10387.9	8500.55	4971.31	7421.15	9933.05	8773.59	8991.12	9649.44	8140.8	6673.16	6674.29	10768.7	6646.79	6646.79	6646.79	6646.79	6646.79	6646.79	6646.79	6646.79	6646.79	6646.79	6646.79	6646.79	18553.7	18626.5	17630.7	17634.7	17423.3	15575.9	5200.8	5223.21	5254.14	5264.82	5234.98	5212.16
787		60101	58344.5	53763.1	49446.2	54839	58280.5	799.135	829.107	783.248	774.625	790.357	782.726	606.838	886.43	722.339	390.777	462.034	855.439	764.543	613.413	665.867	818.601	680.018	493.139	242.365	242.365	242.365	242.365	242.365	242.365	242.365	242.365	242.365	242.365	242.365	242.365	13418	14448.8	15370.4	14221.8	14262.9	14571.6	9340.33	9331.63	9303.38	9315.55	9303.44	9332.83
788		39623.3	40440.3	42486.5	44328.8	44641.6	44386.7	18051.9	17764.5	18520.4	18287.9	17472.5	17376.2	10284	8543.49	8786.26	6673.94	5524.01	7299.56	7834.22	7589.12	7723.62	9600.8	8900.68	8146.86	5666.27	5666.27	5666.27	5666.27	5666.27	5666.27	5666.27	5666.27	5666.27	5666.27	5666.27	5666.27	18943.2	19378.1	20526.2	20447.4	18786.7	19157.7	14236.4	14203	14220	14205.1	14170	14184
789		50983.7	48028.7	36422.1	34000.8	37709.4	38378.8	2394.24	2318.45	2473.25	2688.23	2302.29	2187.5	1683.34	2066.55	1851.38	1642.49	1211.21	1379.18	1915.47	1543.93	1014.01	1653.66	1953.8	1487.09	1181.5	1181.5	1181.5	1181.5	1181.5	1181.5	1181.5	1181.5	1181.5	1181.5	1181.5	1181.5	8847.82	9204.45	9093.19	8643.92	8787.71	8573.52	2774.1	2780.28	2789.7	2788.65	2779.01	2772.75
790		24747.1	22763.4	20395.2	23423.7	24537.4	22504.4	34645.9	33657.8	35038.7	36364.6	36665.8	36477.6	29891.1	28856.3	33372	37119.9	37602	32479.1	25791.1	26915.5	22102.7	23197.5	32274.5	42656.7	23638.6	23638.6	23638.6	23638.6	23638.6	23638.6	23638.6	23638.6	23638.6	23638.6	23638.6	23638.6	13525.1	14844.5	16853.1	15377	14258.2	15239.2	6722.72	6677.07	6646.23	6689.78	6695.35	6688.53
791		39262.6	41939.1	42458.1	41115.2	43047.5	46647.6	29541.7	27814.8	25625.7	23352.3	24318.7	25772.4	18318.4	19386.5	25284.3	26041.4	16911	12704.1	14427.7	15515.6	15116.1	15091.5	16675.6	17191.6	10860.3	10860.3	10860.3	10860.3	10860.3	10860.3	10860.3	10860.3	10860.3	10860.3	10860.3	10860.3	10014.2	9980.14	10200.6	10302	9883.7	9842.12	9786.48	9769.85	9823.66	9845.75	9839.53	9794.49
792		60137.7	59286.6	55577.4	51270.5	52246.2	54489.5	50865.4	55356	49338.3	44620.9	47963.6	48049.7	23953.7	32315.1	31171.9	26491.3	27656.5	35619.3	21820.5	24964.5	37966.7	23834.8	30652.6	35909.7	30316.4	30316.4	30316.4	30316.4	30316.4	30316.4	30316.4	30316.4	30316.4	30316.4	30316.4	30316.4	18602.3	18080.4	16791.7	16274.8	16030.7	17053.3	9425.87	9372.49	9353.65	9397.5	9388.12	9381.97
793		49240.8	50072.3	53062.1	53601.3	49336.8	47983.9	48976.5	47174.7	47700.1	50135.3	52239.4	52518.6	46360.4	47219.3	52250.6	50186.7	44490.4	43687.3	46159.8	45952.3	48240.8	44157	40316	43925.2	31535.2	31535.2	31535.2	31535.2	31535.2	31535.2	31535.2	31535.2	31535.2	31535.2	31535.2	31535.2	10652.8	10164.2	9840.22	10139	10244.4	10379.3	8171.75	8155.83	8147.77	8173.62	8157.75	8144.93
794		10539.5	10901.3	11063.8	10847.2	10304.5	10193.9	9139.21	8431.46	8251.52	9105.66	9222.91	9144.6	8117.3	7160.41	8458.99	8402.31	7444.38	9138.65	8961.94	6865.33	7012.97	8347.12	9553.63	9219.01	5765.46	5765.46	5765.46	5765.46	5765.46	5765.46	5765.46	5765.46	5765.46	5765.46	5765.46	5765.46	10474.7	10269.5	10685.5	10894.4	10153.8	10202.1	15730.8	15732.2	15744.7	15763.4	15757	15737.8
795		32126.3	33937.9	37212	35833.8	39853.6	43393.1	24572.2	24418.2	23758.4	22632.4	21127.5	21809.8	15198.9	17698.2	16221	8334.66	8980.24	11667.9	9638.48	16448.2	20222.8	12634.5	16586	13557.9	6617.92	6617.92	6617.92	6617.92	6617.92	6617.92	6617.92	6617.92	6617.92	6617.92	6617.92	6617.92	10635.4	10453.2	10983	11746	11449.1	11915	15329.4	15248.4	15260.3	15276.4	15161.3	15204.7
796		33072.4	32973.9	33219.8	34555.9	34965.1	35355.7	215.003	205.549	206.763	208.786	213.895	212.695	126.442	116.866	98.9044	101.266	130.32	131.984	100.341	122.869	111.915	91.5193	96.5858	142.736	106.571	106.571	106.571	106.571	106.571	106.571	106.571	106.571	106.571	106.571	106.571	106.571	12936.6	13004.4	12833.8	12787.6	13006.9	12893.4	4254.62	4255.38	4254.55	4254.71	4255.59	4253.46
797		36033	34792.1	35011.5	34060.5	31681.2	33886.8	26029.5	25551.4	24115.7	26109	28288.7	25385.3	15538	20853.1	32741.6	28326.5	17587.6	20693.8	19197.6	22019.4	17500.1	11509.7	18472.3	22184.3	8522.55	8522.55	8522.55	8522.55	8522.55	8522.55	8522.55	8522.55	8522.55	8522.55	8522.55	8522.55	15749.5	15755.4	15854	15571.3	14814.4	15136.6	7234.01	7220.42	7237.46	7238.19	7215.95	7232.6
798		33495.4	33495.4	33495.4	33495.4	33495.4	33495.4	5668.03	5668.03	5668.03	5668.03	5668.03	5668.03	2113.5	2113.5	2113.5	2113.5	2113.5	2113.5	2113.5	2113.5	2113.5	2113.5	2113.5	2113.5	1473.05	1473.05	1473.05	1473.05	1473.05	1473.05	1473.05	1473.05	1473.05	1473.05	1473.05	1473.05	13445.4	13031.5	12522.5	12765.4	12814.8	12494.5	12712.4	12742.5	12762	12754.6	12760.3	12758.8
799		39904.6	40714.6	42531.4	39638	39207.7	39891.8	8123.45	8615.87	8592.55	8253.92	8038.19	8312.73	4749.41	4279.05	4563.15	3928.92	4272.77	5937.33	5951.1	5377.44	4347.59	4245.99	4278.93	4646.44	3498.09	3498.09	3498.09	3498.09	3498.09	3498.09	3498.09	3498.09	3498.09	3498.09	3498.09	3498.09	16887.8	18479.9	16567.3	15111.7	16026.2	14483.3	8972.15	9021.31	9054.76	9056.4	9037.63	9010.98
800		59599.5	58757.8	59142.4	58404	61035.8	68645.4	6382.56	6361.45	6525.73	6109.6	5816.8	5740.64	4889.66	4732.37	2852.08	2878.21	3321.09	7417.53	5917.69	4271.97	5247.23	3959.05	5877.97	6575.13	3132.82	3132.82	3132.82	3132.82	3132.82	3132.82	3132.82	3132.82	3132.82	3132.82	3132.82	3132.82	12969.6	13612.3	15429.3	14680.3	13232.7	13426.3	8727.87	8731.46	8801.88	8817.9	8735.64	8756.92
801		37258.5	36197	32757.7	33711.8	35717.8	32977.6	17151.9	17778.1	16984	16346.1	16247.3	17659.2	22166	20216.6	15882.7	16217.1	15884.4	14919.6	13394.1	13281.2	12937.7	12924.1	20045.9	23961.2	9260.81	9260.81	9260.81	9260.81	9260.81	9260.81	9260.81	9260.81	9260.81	9260.81	9260.81	9260.81	10018.1	9955.82	10029.8	10150.8	10145	10178.3	13823	13837.1	13815	13805.4	13840.5	13844.9
802		37613.3	37621.2	36824.6	36495.9	35882.8	35587.7	67224.8	66546.4	66646.2	68157.2	69282.2	65864	63262.6	71033.7	65411	62538.8	68831.8	76697	71284.3	71824.6	76745.3	78675.4	75822.8	64808.9	37923.5	37923.5	37923.5	37923.5	37923.5	37923.5	37923.5	37923.5	37923.5	37923.5	37923.5	37923.5	15116	14747	13694.2	14037	14694.2	14353.1	13182.3	13222.5	13140.5	13160.3	13106	13054.3
803		30409.6	28714.6	28721.3	28790.3	27607	29390.6	13859.8	13855.8	14232.5	14604.4	14165	14152	12347.7	12308.4	13785.5	11575.7	12472.8	13153.1	11353.7	11071.6	11216.3	11865.5	11770.1	14108.6	8575.05	8575.05	8575.05	8575.05	8575.05	8575.05	8575.05	8575.05	8575.05	8575.05	8575.05	8575.05	12952.7	12728.4	12760.6	13037.4	12910.5	13017.4	3125.19	3125.33	3124.49	3119.87	3123.36	3123.89
804		49895.5	52899.2	53105.3	46564.1	49935.9	52291.6	60767.9	67469	64286	59703.9	57827.6	60240.9	40381.3	32152.9	39254.8	38612.1	34241.8	40176.8	51461.4	55208.5	49872.7	40442.6	34625.1	46871.8	51722.2	51722.2	51722.2	51722.2	51722.2	51722.2	51722.2	51722.2	51722.2	51722.2	51722.2	51722.2	11261.9	10961.1	10716.7	10964.7	11385.4	11465.6	5349.57	5353.38	5348.38	5343.7	5346.22	5339.29
805		20872.7	22949.7	24442.7	24022	25574.1	22687.4	9515.35	9413.39	9641.81	10707.2	10884.8	10085.2	4713.64	5688.45	7174.31	9309.13	7920.73	5594.45	5062.93	4919.85	5029.67	4962.6	4845.15	4879.73	2494.34	2494.34	2494.34	2494.34	2494.34	2494.34	2494.34	2494.34	2494.34	2494.34	2494.34	2494.34	9104.11	9082.54	8540.39	8687.23	8743.74	8361.16	10726.4	10727.8	10704.8	10717	10724.2	10679.2
806		34949.3	34312	33223.7	34816	34678.8	32339.3	15812.5	16146.9	15914.4	15849.2	15857.3	16083.6	7505.01	6527.88	7206.16	8740.23	8778.39	7434.01	6835.56	6054.59	7131.59	9202.66	8646.84	10135.8	5508.38	5508.38	5508.38	5508.38	5508.38	5508.38	5508.38	5508.38	5508.38	5508.38	5508.38	5508.38	20336.5	18790.7	17431.9	17980.6	18084.1	19301.2	5406.78	5396.38	5396.68	5395.59	5407.03	5417.97
807		41344.8	43339.2	41921.6	37659.8	39297.4	38559	39260.1	41749.1	40449	40991.4	42643.2	41626.2	33936.1	28665.5	18984.5	26733.9	36545.2	36084.6	36112.7	26816.2	22005.2	28410.2	21609.8	17762.3	17713.1	17713.1	17713.1	17713.1	17713.1	17713.1	17713.1	17713.1	17713.1	17713.1	17713.1	17713.1	8971.31	9052.87	9147.16	9107.28	9397.86	9439.32	4393.92	4389.67	4388.74	4396.22	4388.75	4399.19
808		16136.6	15326.2	15461.5	16698.2	17709	17422.9	47124.5	46607.1	46439.5	48155.3	46991.9	46926	27522.1	22820.5	23493	24400.2	25881.4	29534.3	24235.7	25108.8	40509.4	39563.5	35512	30753.1	14703.3	14703.3	14703.3	14703.3	14703.3	14703.3	14703.3	14703.3	14703.3	14703.3	14703.3	14703.3	10615.8	10570.3	10425.8	10781.1	11436	11602	5924.99	5907.75	5877.92	5866.23	5902.88	5946.73
809		46596.3	42452.8	39302.3	46123.8	39587.6	38363.1	65133.6	58501.1	56103.6	59691.6	57013	61786.8	69304.1	37387.5	35943	42940	42414.5	44336.1	48044.9	59532.6	65060.6	62188.5	43290.8	33761.3	30835.5	30835.5	30835.5	30835.5	30835.5	30835.5	30835.5	30835.5	30835.5	30835.5	30835.5	30835.5	13029.4	13286.9	14491.9	14912.8	14202.6	14378.7	9225.68	9213.91	9216.06	9199.84	9192.95	9203.58
810		37488.1	36120.5	34137.3	35372.5	34234.5	33303.8	23234.1	23389.9	25036.5	24254.3	22517.4	22984	12133	14582.8	13043.7	13972.7	12823.7	8890.13	10385.4	13323.4	11808.1	11664.6	12527.5	12821.9	8414.9	8414.9	8414.9	8414.9	8414.9	8414.9	8414.9	8414.9	8414.9	8414.9	8414.9	8414.9	18839.5	18816.8	18567.1	18590.6	19060.6	18450.3	9293.44	9304.64	9348.16	9327.58	9324.99	9376.07
811		57595	58309.4	60117.4	60138.1	59219.5	58535.9	6866.27	6726.9	6571.04	6628.25	6489.96	6523.56	6922.38	6489.87	6180.49	6926	7571.36	6980.76	6648.57	7079.61	7405.33	7854.86	6781.4	6535.12	4020.56	4020.56	4020.56	4020.56	4020.56	4020.56	4020.56	4020.56	4020.56	4020.56	4020.56	4020.56	11633.8	13270.3	13419.4	11558.8	12393.6	12618	10161	10165.2	10148.7	10091.6	10073.7	10106.2
812		19366.6	19726.3	19531.9	19049.9	19038.9	18844.7	21057.8	21380.4	20728.2	20480.1	20676.7	20959.4	8710.47	8688.97	8954.99	8381.26	8565.82	9221.92	10742.8	12339.5	12129.6	9512.98	8367.55	8861.1	5976.73	5976.73	5976.73	5976.73	5976.73	5976.73	5976.73	5976.73	5976.73	5976.73	5976.73	5976.73	10431.2	10580.4	10421.1	10056.1	10161.4	10653.4	10929	10905.1	10943.8	10968.1	10947.2	10920.8
813		28195.7	29345.3	34281.7	38018.4	36634	34339.8	424.276	455.594	467.126	400.764	404.327	416.787	282.909	393.072	435.4	226.288	200.446	329.872	324.485	213.804	273.881	357.491	432.55	405.118	187.121	187.121	187.121	187.121	187.121	187.121	187.121	187.121	187.121	187.121	187.121	187.121	13604.8	13907.2	14336	13723.2	11978.4	12242.1	4240.28	4256.33	4264.92	4246.94	4230.83	4242.42
814		48338.2	46059.8	46234.8	48157.6	45151	45058.2	22259.8	22065.3	21318.4	21109.2	22122.1	23277.2	15457.2	16914.1	16711.8	16492.7	12783.3	13344.6	21854.8	17114.7	13742.2	11458.9	13104.7	13182	7602.84	7602.84	7602.84	7602.84	7602.84	7602.84	7602.84	7602.84	7602.84	7602.84	7602.84	7602.84	15429.9	15567.9	15122	15193.7	15770.8	15430.3	4690.85	4686.66	4684.63	4695.8	4689.04	4687.16
815		58905	59140.4	58493	57200.7	57737.7	58777.1	4363.84	4329.79	4216.61	4302.1	4357.09	4238.11	5097.68	5611.08	5846.82	5815.81	5804.03	5605.99	5773.38	5833.07	5466.69	5136.08	5344.76	5331.36	3228.45	3228.45	3228.45	3228.45	3228.45	3228.45	3228.45	3228.45	3228.45	3228.45	3228.45	3228.45	21992.5	21842.1	21771.6	21724.1	21735.8	22084.9	5887.19	5882.78	5883.41	5884.5	5884.37	5890.43
816		24844.7	24698.6	24686.8	24783.6	24761.4	24908	23168.7	23197.2	23185.1	23106.2	23079.7	23049.5	27368.2	27529.2	27350.8	27323.1	27577.9	27272.5	27198.5	27491.4	27815.3	27659.2	27364.7	27379.1	16261.4	16261.4	16261.4	16261.4	16261.4	16261.4	16261.4	16261.4	16261.4	16261.4	16261.4	16261.4	10180.8	10167.5	9744.78	9545.92	10125.5	10081.2	9203.93	9204.58	9165.48	9183.35	9155.24	9155.59
817		29001.3	25906.1	23803.7	25368.9	27164.8	28593.8	1128.81	1134.34	1119.14	1070.74	1057.92	1075.33	611.685	810.623	983.97	817.512	546.854	446.465	447.16	532.626	651.794	882.154	479.1	314.847	342.916	342.916	342.916	342.916	342.916	342.916	342.916	342.916	342.916	342.916	342.916	342.916	17547.7	18644.5	18111.9	16995.5	16952.5	15756.2	12237.2	12323.9	12350.5	12342.4	12399.6	12332.3
818		44027.3	42566.7	42212.9	45893.2	51736.7	50679.2	43314	44127.4	45637.5	45421.5	45986.1	41539.2	30173.4	34559.7	40393.4	36579.7	36053.1	37161.7	41460.8	53392.6	40152	37431	40107.7	33690.8	21623.8	21623.8	21623.8	21623.8	21623.8	21623.8	21623.8	21623.8	21623.8	21623.8	21623.8	21623.8	17658.9	18822.3	22732.8	22068.4	19262.1	18272.8	4879.69	4915.81	4923.86	4905	4907.02	4916.68
819		38700.1	40449.2	41079.8	39979	41389.5	41573.8	30425.8	29744.8	29327.8	30239.1	29815.7	29085	13457.9	14217.2	13945.5	11494.3	12252.1	16525.4	20268.5	15098.7	14889.2	15221.2	13376.6	15109.6	8932.63	8932.63	8932.63	8932.63	8932.63	8932.63	8932.63	8932.63	8932.63	8932.63	8932.63	8932.63	18324.5	19466.4	20305.2	19587.9	19803.4	19117.5	7085.31	7083.57	7073.38	7104.49	7143.7	7150.34
820		33125.8	30895.9	33599	38085.7	32909	32359.9	22317.3	22239.7	21518.4	21054.3	20516.8	22756.1	19145.1	10959.7	12615.2	15361.3	17955.5	17358.8	18012.5	18484	14296.5	12194	12351	15136.4	6898.58	6898.58	6898.58	6898.58	6898.58	6898.58	6898.58	6898.58	6898.58	6898.58	6898.58	6898.58	6106.31	5822.57	5859.16	5932.74	5938.92	6698.18	6276.25	6250.06	6267.04	6244.45	6221.86	6281.54
821		52531.1	56345.5	70524.2	69378.9	59723.2	57395	11417.8	11211.6	11587.9	12198.6	11866.9	11916.7	10936.8	9901.64	7532.6	6705.25	7123.75	7248.97	6736.2	12066.7	13062.8	8473.29	8039.04	8613.74	4121.25	4121.25	4121.25	4121.25	4121.25	4121.25	4121.25	4121.25	4121.25	4121.25	4121.25	4121.25	8142.23	8564.92	9359.54	8759.62	8833.78	9216.49	16289.6	16289.9	16276.1	16326.1	16342.6	16323.5
822		22905.5	21034.5	19603.3	22325	23500.3	21215.1	11412.3	12073.8	12046.6	11464.5	11651.4	11957.5	7149.72	6212.24	5944.3	8338.24	8403.45	6910.6	5715.49	5804.24	8496.16	7170.13	5799.55	4617.04	4276.91	4276.91	4276.91	4276.91	4276.91	4276.91	4276.91	4276.91	4276.91	4276.91	4276.91	4276.91	22611.1	21928.9	20297.7	21219.1	21872	21820.6	6564.94	6584.29	6604.41	6588.14	6604.02	6595.59
823		27647.8	28721.9	29565.4	29079.8	27366.6	26364.5	3074.96	3117.92	3102.97	3182.1	3036.49	2971.34	3327.96	2751.29	2478.03	2839.53	3021.78	2790.04	2866.47	3333.37	3825.8	3921.12	3038.1	2681.69	1838.21	1838.21	1838.21	1838.21	1838.21	1838.21	1838.21	1838.21	1838.21	1838.21	1838.21	1838.21	16175.4	15635.6	16340.3	17412.4	17485.5	17138.4	8043.93	8054.09	8014.6	8035.35	8052.99	8024.3
824		25844.7	24449.8	23569	24305.8	24999.4	24449.3	11306.6	11739.8	11451.5	11435.8	11928.6	11638	4248.96	4190.42	5497.93	6561.04	6814.17	7232.83	6302.88	5585.75	6008.47	8718.02	10028.3	5601.72	4879.19	4879.19	4879.19	4879.19	4879.19	4879.19	4879.19	4879.19	4879.19	4879.19	4879.19	4879.19	20111.6	21026.9	21072.8	19777.7	21249.8	22856.9	12980.2	12909.6	12975.3	12950.1	12924.6	13015
825		33158.7	32931.5	30992.9	30361	34242.8	34352.1	14018.9	13982.7	13677.4	13834.4	14356.5	14624.9	8625.02	13308.7	14770.9	10768.3	12133.3	9944.43	8502.59	10510.1	9795.15	8544.43	9943.32	10442.9	6127.92	6127.92	6127.92	6127.92	6127.92	6127.92	6127.92	6127.92	6127.92	6127.92	6127.92	6127.92	8308.06	7925.12	8175.86	8678.5	8989.35	8639.96	6406.03	6419.85	6430.39	6428.73	6422.4	6443.99
826		18944.3	18671.1	17718.9	18000.4	20265.6	20130.7	3473.48	3482.9	3355.67	3356.31	3307.48	3374.46	3267.14	2962.44	3617.09	3739.32	3619.25	3654.02	3046.78	3140.34	3338.25	3412.94	3368.07	3347.85	1945.47	1945.47	1945.47	1945.47	1945.47	1945.47	1945.47	1945.47	1945.47	1945.47	1945.47	1945.47	12178.5	12297.1	12102.6	11908.5	11717.4	11994.3	12548.9	12515.3	12546.8	12590.3	12544.9	12462.8
827		37452.5	36753.3	38045	37770.3	37492.5	39387	14064.5	14237.7	13868.1	13597.4	13713.5	13783.7	13204.3	14189	14709.3	13521.5	13697.6	13331.4	14187.4	17417.4	14029.4	12042.9	12459.5	15535.3	11175.5	11175.5	11175.5	11175.5	11175.5	11175.5	11175.5	11175.5	11175.5	11175.5	11175.5	11175.5	20376.6	19885.8	20126.7	21920.8	22870.1	22182.7	6238.49	6218.6	6208.51	6206.57	6194.09	6207.13
828		54590.4	49745.4	44626.6	45474.2	42901.8	46691.2	5050.31	5020.52	4847.18	4816.05	5004.91	4922.3	4872.41	3503.74	2573.42	5013.89	4411.99	4255.33	5462.92	3441.27	4818.18	5910.43	2866.18	4007.09	3142.95	3142.95	3142.95	3142.95	3142.95	3142.95	3142.95	3142.95	3142.95	3142.95	3142.95	3142.95	13994.2	14385.4	14457.9	14269.3	14100.1	13946.6	3899.58	3896.18	3898.42	3903.47	3902.58	3900.22
829		38426.3	38762.5	39381	38417.6	38648.3	39602.5	16844.6	16483	16404.4	17094	16988	16583.5	6964.28	7355.74	7202.83	6685.19	7543.05	8947.62	9675.1	7452.11	7731.56	8458.89	7535.62	6910.81	4911.11	4911.11	4911.11	4911.11	4911.11	4911.11	4911.11	4911.11	4911.11	4911.11	4911.11	4911.11	18694.3	18529.4	17612	17272.2	15596.9	15759.8	15183.3	15236.6	15385.1	15308.9	15180.3	15094
830		26821.4	27034.2	28186.3	27802.9	29012.6	29620	19317	19326.4	19086.4	19090.8	17831.2	17860	12227.9	14315.4	10625.7	8248.16	7692.91	11040.3	9910.82	9118.08	9501.77	9972.72	9925.57	8152.8	5562.68	5562.68	5562.68	5562.68	5562.68	5562.68	5562.68	5562.68	5562.68	5562.68	5562.68	5562.68	14375.1	13876.2	13700.5	14583.6	14885.7	13485.7	7857.6	7890.21	7914.62	7955.66	7980.1	7949.59
831		35652.7	36238.9	35140.4	35373.9	35489.4	32574.3	27982	28263.1	28235.9	28639.9	26088.1	26774.4	16153.7	11929.2	12206.4	13096.9	13142.2	15349.2	12649	17282.9	19483.9	14275.8	13530.8	14895.7	8954.35	8954.35	8954.35	8954.35	8954.35	8954.35	8954.35	8954.35	8954.35	8954.35	8954.35	8954.35	6616.86	6851.25	6632.43	6213.25	6108.61	6144.18	6430.03	6443.07	6473.77	6449.4	6414.84	6428.93
832		28655.8	29316.7	31878.3	31902	32766.9	32734.9	25847.5	24415.2	25004.6	27369.5	26678.5	25137.5	13163.2	15772	16165.6	24883.4	35962.5	25243.5	15517.2	13642.8	14168.8	13612	15660.3	18352.2	9457.16	9457.16	9457.16	9457.16	9457.16	9457.16	9457.16	9457.16	9457.16	9457.16	9457.16	9457.16	15680	14505	15154.7	17175.7	16378.4	18534.6	9011.86	8907.49	8874.01	8884.73	8930.78	8916.02
833		58596.2	59395.7	56217.3	57854.3	58688.1	55517.2	25261.8	25555.1	25284.3	23571.5	23628.3	25400.5	18266.7	15995.8	12836.9	16154	21977.2	20580	20963.8	22259.6	21220.5	21599.8	19985.4	16579.1	13876.2	13876.2	13876.2	13876.2	13876.2	13876.2	13876.2	13876.2	13876.2	13876.2	13876.2	13876.2	21010.1	21710.9	21584.1	20306.1	17523.5	17943.4	9394.47	9381.84	9386.32	9392.41	9362.37	9344.13
834		39429.9	36708.2	32991.4	33567.9	32867.9	33745.7	56667.8	55830.2	53944.4	53919.1	57624.4	60177.8	45555.7	34270	32799.9	37041.3	23897.7	23483.9	43496.8	52993.9	36886.3	34870.7	43172.8	41721.6	33950.7	33950.7	33950.7	33950.7	33950.7	33950.7	33950.7	33950.7	33950.7	33950.7	33950.7	33950.7	16348.8	16218.1	17420.5	17636.9	17042	17262.1	3292.8	3301.8	3305.78	3292.37	3298.63	3305.18
835		25572.4	25319.9	25700.3	25163.7	24019.2	24829.4	6446.37	6768.83	6597.84	6133.12	6361.94	6254.29	2916.74	3518.36	3881.04	3631.48	3577.44	4053.95	5165.06	4633.79	3531.14	3814.33	4473.39	3860.94	1782.89	1782.89	1782.89	1782.89	1782.89	1782.89	1782.89	1782.89	1782.89	1782.89	1782.89	1782.89	17151.4	16516.9	17024	17747.5	16813.9	15734.4	7469.53	7477.26	7526.91	7577.17	7535.99	7540.23
836		53678.5	53674.5	52515.2	53438.8	57591	55143.8	40122.8	41625.6	39551.7	39626.2	41175.7	41108.9	41043.9	38530.6	44999.4	44177.1	33592.1	38798.9	42231.6	34237.1	33728.4	39447.1	59110.7	48771.6	20741.1	20741.1	20741.1	20741.1	20741.1	20741.1	20741.1	20741.1	20741.1	20741.1	20741.1	20741.1	17419.4	18824.1	22134.4	22011.6	20491.6	18927.3	11529.6	11601.6	11637.6	11577	11532.8	11526.3
837		46975.5	45294.2	43693.5	48055	56302.1	52448	27513.9	28741.7	27555.2	25689.6	25630.4	26451.5	15451.9	14578.4	13887.9	14779.1	12842.3	15405.2	22895.5	15994	13862.5	17999	18852.3	15460.8	8415.29	8415.29	8415.29	8415.29	8415.29	8415.29	8415.29	8415.29	8415.29	8415.29	8415.29	8415.29	5676.5	5510.45	5081.22	5036.8	5158.1	4998.98	10703	10757.7	10769.3	10765	10739	10748.4
838		31881.1	31881.1	31881.1	31881.1	31881.1	31881.1	18156.6	18156.6	18156.6	18156.6	18156.6	18156.6	6770.26	6770.26	6770.26	6770.26	6770.26	6770.26	6770.26	6770.26	6770.26	6770.26	6770.26	6770.26	4718.66	4718.66	4718.66	4718.66	4718.66	4718.66	4718.66	4718.66	4718.66	4718.66	4718.66	4718.66	11478.3	11478.3	11478.3	11478.3	11478.3	11478.3	13795.9	13795.9	13795.9	13795.9	13795.9	13795.9
839		30656.8	33110.8	39401	36427.8	31903.3	32555.8	25561.3	25662.3	24649.9	24062.6	23261.1	22817.5	11894.6	12681.3	11554.9	18092.8	19598.1	13250.1	11273.5	10342.6	10154.3	17559	26514.8	24009.9	13158.6	13158.6	13158.6	13158.6	13158.6	13158.6	13158.6	13158.6	13158.6	13158.6	13158.6	13158.6	21494.6	19754.3	22359	26049.9	24038.8	23124.2	8681.28	8689.96	8693.33	8651.77	8644.41	8673.25
840		39458.9	38468.8	34082.5	34710.6	41207.8	38886.5	18172.3	18910.7	18862.5	18750.3	18098.1	18567.4	12376.8	12097.3	14971.6	13471.9	11570.5	15689.9	16129.9	9335.14	9699.43	9770.83	8973.35	12238.8	8086.39	8086.39	8086.39	8086.39	8086.39	8086.39	8086.39	8086.39	8086.39	8086.39	8086.39	8086.39	9958.79	9992.13	10036.3	10002.9	10037.1	9981.86	11799.3	11804	11797.7	11799.4	11797.3	11790.3
841		25563.8	25052.7	26669	33284.6	33079	24275.8	15028.8	15533.8	12509.2	14174.2	15195.6	14602.2	14335.8	13074.6	8540.24	8541.4	9890.52	10190.8	14894.3	11325.4	10049.4	8948.93	7673.62	6361.31	3600.54	3600.54	3600.54	3600.54	3600.54	3600.54	3600.54	3600.54	3600.54	3600.54	3600.54	3600.54	19468	18478.7	17985.1	17977.2	17822	19258.2	7334.33	7321.52	7317.57	7320.44	7354.98	7354.79
842		34991	33898.2	35967.4	39533.7	32459.9	31003.4	30399.9	29519.8	27167.8	29459.5	30055.5	30313	33688.8	30212.5	37196.3	25326.6	29337	46443.3	27068.4	19586.2	26187.5	19106.5	15325.4	15518.9	9977.46	9977.46	9977.46	9977.46	9977.46	9977.46	9977.46	9977.46	9977.46	9977.46	9977.46	9977.46	17906.4	17832.5	17735.5	17981	18161.8	17907.5	15811.1	15835	15847.1	15825.5	15817	15819.6
843		27361.1	27320.5	29595.9	27529.8	25665.6	25818.1	331.007	385.747	410.463	409.625	398.93	392.174	222.373	206.71	338.969	227.825	185.169	179.553	208.728	297.702	263	217.803	211.625	161.047	100.048	100.048	100.048	100.048	100.048	100.048	100.048	100.048	100.048	100.048	100.048	100.048	16349.3	16281.5	15566.1	15151.1	15412.3	15815.9	12085	12081.2	12064.7	12008.9	12002	12035.8
844		42119.9	37794.6	36728.2	40670.9	40202.4	42465.7	7976.29	7451.29	6522.86	6905.79	7968.7	8355.9	9386.18	9692.47	7028.21	6188.03	6649.76	4794.17	5024.86	4451.9	4543.08	3604.19	2807.83	4654.36	2771.11	2771.11	2771.11	2771.11	2771.11	2771.11	2771.11	2771.11	2771.11	2771.11	2771.11	2771.11	12412.2	12480.1	12304	11874.5	12163.4	12259.8	4556.63	4569.15	4584.56	4578.36	4549.81	4556.92
845		48184.2	49041.3	49287.2	48022.5	47326.1	47482.4	15630.9	15267.9	14960.6	15206.1	15191.6	15331.2	16804.2	16362.3	16351.3	17278.2	15783.9	16221.7	18496.4	17639.5	17397.6	17262.3	16772.5	16238.1	9006.78	9006.78	9006.78	9006.78	9006.78	9006.78	9006.78	9006.78	9006.78	9006.78	9006.78	9006.78	20941.9	21102.6	21908	21401.4	20854.5	20777.2	8637.45	8682.86	8658.27	8631.56	8627.79	8642.79
846		26687.2	26935	30841.9	31681	30387.8	32069.5	32909.8	31970.3	33498.7	33431.9	33718.7	32951.7	18987.9	19429.5	19258.2	21328.4	21293.8	21245.7	22305.5	22843	21860.3	17139.6	15858.5	20152.7	12769.8	12769.8	12769.8	12769.8	12769.8	12769.8	12769.8	12769.8	12769.8	12769.8	12769.8	12769.8	19483.1	18863.9	16999.7	15952.9	17324.4	18711.9	3606.95	3612.44	3622.74	3624.55	3612.48	3606.3
847		37046.4	36369.6	32648.7	32529.6	33822.3	34178.7	5681.97	5536.65	5877.31	6066.82	5697.13	5786.18	3218.92	2733.3	2783	2693.92	3058.59	3894.41	4031.88	3035.2	3539.73	4564.12	3247.8	2920	2276.58	2276.58	2276.58	2276.58	2276.58	2276.58	2276.58	2276.58	2276.58	2276.58	2276.58	2276.58	10598	11254.6	11852.4	10881.2	10633.3	11227.8	9143.75	9130.26	9135.64	9113.37	9126.37	9161.95
848		49681.9	50706.3	61987.6	59634.1	54613.2	64543.5	43413.2	38572.7	40859.3	42465.7	42530.1	40057	24262	27160.6	29383.3	34706.1	31227.7	24531.4	17224.3	25018.2	28347.7	28865.3	39526.7	52599.6	26358.5	26358.5	26358.5	26358.5	26358.5	26358.5	26358.5	26358.5	26358.5	26358.5	26358.5	26358.5	7099.27	7040.28	6928.35	7027.9	7295.57	7107.49	8319.14	8328.7	8320.56	8319.68	8324.44	8325.05
849		55243.7	59904.2	58635.1	52546.4	55325.8	56334.4	59162.7	58875.1	60255.3	61936.7	61358.5	59127.4	51588.3	60030.1	60103.5	49288.1	48958.1	49579.5	51147.6	51462.5	53684.4	66498.1	56766.6	50754.9	36997.9	36997.9	36997.9	36997.9	36997.9	36997.9	36997.9	36997.9	36997.9	36997.9	36997.9	36997.9	16339.1	16327.1	16196.3	16156.7	16298.5	16345.4	10010.8	10009.6	10010.2	10012.4	10013.9	10010.9
850		29332.2	28828.6	28638	31353	31467.2	29568.1	37518.2	37000	35237	35378.3	35019.1	32514.5	23373	33349	41718.7	34208.6	27783.8	30402.7	31122.8	26320.3	29514.5	26785	27472.2	35246.2	16379.5	16379.5	16379.5	16379.5	16379.5	16379.5	16379.5	16379.5	16379.5	16379.5	16379.5	16379.5	18495.8	18352.5	18552.3	18458.3	18039.7	18657.2	6476.21	6453.58	6473.14	6506.14	6506.08	6505.4
851		50207.8	52200.8	56101.3	55088.9	53199.1	53216.2	24303.9	24388	23785.2	23132.4	23615.7	23602.7	21209.3	24381.4	21053.9	19004.3	22603.5	23396.6	21506.3	20364	22132.6	22529.6	23868.8	26224.6	15192.7	15192.7	15192.7	15192.7	15192.7	15192.7	15192.7	15192.7	15192.7	15192.7	15192.7	15192.7	8808.17	8878.01	8920.85	8784.23	8419.91	8682.97	7085.15	7089.11	7058.28	7033.04	7064.2	7053.05
852		36369.6	37179.4	36773.7	33976.9	31501.7	30387	19697.8	19731	19158	20743	19487.4	19114.4	14891.7	13156.9	9171.76	8051.48	12161.3	13919.7	9768.03	14561	13541.1	11301.2	13871.6	12950.8	6689.53	6689.53	6689.53	6689.53	6689.53	6689.53	6689.53	6689.53	6689.53	6689.53	6689.53	6689.53	16254.8	14676.9	14290.7	15399.3	15184.1	15834.6	7888.45	7908.32	7936.69	7936.55	7920.11	7890.47
853		27946.9	27894.8	27417.7	26982.6	28089.9	28384.7	22283.1	22305.6	22471.3	22649.2	22471.3	22491.8	28703.5	28512.9	28753.4	29422.9	29197	28482.3	28925.5	26845.5	26898.2	29345.2	29783.4	29355.1	17123.1	17123.1	17123.1	17123.1	17123.1	17123.1	17123.1	17123.1	17123.1	17123.1	17123.1	17123.1	21060.8	21348.4	20918.7	20461.6	20790.1	20974.4	6335.58	6339.83	6360	6340.22	6343.06	6368.79
854		36621	37398	33364	32715.9	36397.9	35601.8	11630.8	10920.8	11069.9	11500.6	11628.9	12524.2	9869.85	7196.93	6415.86	5507.09	4404.57	4730.86	7262.84	9990.6	9396.09	8896.04	6403.3	6546.48	5274.46	5274.46	5274.46	5274.46	5274.46	5274.46	5274.46	5274.46	5274.46	5274.46	5274.46	5274.46	7255.13	7226.99	7790.77	8299.17	8071.88	8129.6	15090	15111	15151.1	15014.3	15019.2	15116.2
855		25839.2	25579	25603.2	25766.6	25782	25945.4	532.418	536	535.796	533.267	537.686	534.163	213.963	213.332	209.943	234.869	247.933	224.725	208.547	213.023	248.657	238.394	217.848	213.634	153.741	153.741	153.741	153.741	153.741	153.741	153.741	153.741	153.741	153.741	153.741	153.741	14846.1	15350.9	14772.2	15350.8	17440.6	15830.2	8010.61	8025.08	8021.09	8020.8	8038.11	8036.26
856		62485.9	63347.7	62080.5	60454.5	54798.9	59146.9	4351.28	3933.9	3930.38	3864.4	3614.47	3913.24	6563.7	6228.96	6666.84	7017.12	5603.66	5862.77	6658.19	5967.26	6508.16	6910.63	6503.98	6254.48	3607.85	3607.85	3607.85	3607.85	3607.85	3607.85	3607.85	3607.85	3607.85	3607.85	3607.85	3607.85	20172.4	19574.8	19292.5	19320	19451.2	20821.4	13646.6	13575.8	13562.9	13586.7	13613	13653.8
857		47033.6	46634	45611.5	48885.1	48592.5	44219.6	5912.08	6182.53	5868.96	5422.97	5924.34	6107.44	3171.93	3848.54	2985.95	2455.43	2630.7	3119.75	3452	2380.15	3570.39	3403.91	2460.3	4102.63	2652.68	2652.68	2652.68	2652.68	2652.68	2652.68	2652.68	2652.68	2652.68	2652.68	2652.68	2652.68	11918.1	12093.4	11688.6	11413.5	11185.1	11054.4	14293.1	14310.8	14346.2	14358.3	14387.7	14356.8
858		44929.2	46821.7	51076.6	50754.2	48811.1	48360.4	40653.9	41738.7	41703.9	38938.2	39046.1	39330.3	36352.6	37437	34963.3	36723.6	34269	31200.5	31898.8	35634.3	41380.4	41142.2	44721.4	48302.4	25802.5	25802.5	25802.5	25802.5	25802.5	25802.5	25802.5	25802.5	25802.5	25802.5	25802.5	25802.5	9012.55	9259.58	9090.15	8815.03	8845.32	8788.7	10183.7	10184.3	10186.5	10192.3	10176.8	10162.5
859		36014	37517.1	44983.6	44449.2	37667.4	37382.6	26021.2	26027.2	26360.3	27156	28487.4	29322.3	20897.9	25426.5	32695.7	19952.6	25489.1	20950.8	14780.5	18092.6	18147.3	16895.2	15911	16271.7	11802.8	11802.8	11802.8	11802.8	11802.8	11802.8	11802.8	11802.8	11802.8	11802.8	11802.8	11802.8	10548.9	9841.24	9951.82	10444	9884.07	10120.3	10489.1	10533.2	10515.3	10485.5	10523.6	10506.1
860		49030.8	49128.5	51094	50068	47965.2	51113.7	17523.9	17444.1	16122.9	15134.8	16351.5	16705.5	13805.6	11643.4	12751.5	14355.7	11261.7	11588.1	11294.8	12733	12265.4	14205.8	14650	11042.3	8870.73	8870.73	8870.73	8870.73	8870.73	8870.73	8870.73	8870.73	8870.73	8870.73	8870.73	8870.73	6533.31	6573.02	6649.51	6594.25	6865.41	6781.68	7631.34	7643.04	7610.46	7639.36	7641.09	7615.18
861		72475.1	74717	65745.8	66779.9	69379.2	58995.5	3141.73	3068.21	2848.57	3021.4	2999.78	3205.02	3394.97	3713.29	3436.27	3589.16	3945.56	2365.65	1908.38	1783.15	1632.44	3566.46	2888.68	2398.83	2361.68	2361.68	2361.68	2361.68	2361.68	2361.68	2361.68	2361.68	2361.68	2361.68	2361.68	2361.68	17556.9	17311.4	18161.6	20063.7	20039	19318.3	8228.24	8219.17	8205.18	8218.88	8243.34	8221.57
862		40708.2	38963	38815.5	43098.1	44059.3	39803.5	16325.7	17269.6	17408.1	16978.7	16242.8	16458.1	18238.6	20354.9	13948.5	11976.6	20081.5	18582.4	10380.9	9105.98	9675.31	14890.3	14545.9	14193.9	10242.2	10242.2	10242.2	10242.2	10242.2	10242.2	10242.2	10242.2	10242.2	10242.2	10242.2	10242.2	14015	14657.7	16786.2	17491.6	15614.8	13993.8	7348.78	7375.27	7353.23	7306.47	7321.41	7351.45
863		36493.3	36438.8	36333.2	36302.8	36187.7	36245.7	20485.4	20480.9	20485.6	20506	20519.3	20477.7	7720.6	7752.94	7797.71	7688.39	7690.45	7759.3	7739.11	7712.44	7729.04	7705.74	7847.46	7920.71	5403.48	5403.48	5403.48	5403.48	5403.48	5403.48	5403.48	5403.48	5403.48	5403.48	5403.48	5403.48	14127.1	14249.7	13915.1	12959.1	13234.6	13530.4	8027.51	8044.78	8034.5	8040.54	8063.06	8067.91
864		34517.1	34627.6	35272.9	35467.4	35771.3	35506.5	3986.4	3863.63	3810.32	3901.2	3913.11	3831.24	1610.9	2060.26	2186.06	2108.98	1617.32	1645.35	1935.71	1766.26	1789	2102.45	2949.56	2246.74	1309.77	1309.77	1309.77	1309.77	1309.77	1309.77	1309.77	1309.77	1309.77	1309.77	1309.77	1309.77	17769.8	18601.9	18897.7	18398.2	17869.3	16683	2733.43	2746.5	2753.96	2749.98	2743.79	2736.19
865		31971.3	30687.5	30993.2	30856.2	31888.6	31397.7	15173.3	17085.5	15247.6	13517.7	13359.1	15051.8	10481.2	9958.5	13343.1	8528.08	6968.99	8550.48	7923.5	8058	9757.52	7204.54	10700.3	14851.5	6197.95	6197.95	6197.95	6197.95	6197.95	6197.95	6197.95	6197.95	6197.95	6197.95	6197.95	6197.95	17313.7	16924.1	17284.4	17242.9	16822.1	16474.5	9425.47	9455.59	9453.91	9505.26	9491.17	9481.04
866		22787.3	23917.6	23813.9	22351	21436.7	22257.6	18820.6	18073.1	17597.7	19036.3	18569.6	17094.2	9521.21	11225.4	11490.2	8020.42	7611.87	10699.7	10000.7	5765.21	7134.79	13653.9	13090.3	16507.7	11638.6	11638.6	11638.6	11638.6	11638.6	11638.6	11638.6	11638.6	11638.6	11638.6	11638.6	11638.6	8691.58	8691.58	8691.58	8691.58	8691.58	8691.58	10648.2	10648.2	10648.2	10648.2	10648.2	10648.2
867		17885.4	17885.4	17885.4	17885.4	17885.4	17885.4	14467.8	14467.8	14467.8	14467.8	14467.8	14467.8	5394.77	5394.77	5394.77	5394.77	5394.77	5394.77	5394.77	5394.77	5394.77	5394.77	5394.77	5394.77	3759.99	3759.99	3759.99	3759.99	3759.99	3759.99	3759.99	3759.99	3759.99	3759.99	3759.99	3759.99	12205.6	12305.7	12530	12596.1	12831.8	12726.9	14772.1	14770.2	14774.8	14785.4	14814.1	14818.5
868		31599.5	32133.1	32161.6	30960.4	30597.2	30764.7	7527.38	7586.34	7632.79	7650.25	7584.47	7629.38	3219.77	3282.04	3327.86	3115.4	3110.9	3108.79	3189.26	3290.72	3672.17	3833.6	3432.77	3337.46	2441.19	2441.19	2441.19	2441.19	2441.19	2441.19	2441.19	2441.19	2441.19	2441.19	2441.19	2441.19	17302.7	17164.5	18340.9	18695.6	17133.4	16806.6	12093.4	12132.7	12138.3	12140.2	12135.4	12082.5
869		34802.4	38057.9	37723.2	31195.8	32682	36097.1	13390.3	13433.2	13279.4	12776.8	12528.5	12410.8	6206.67	7049.05	8024.31	7879.33	7619.54	6757.89	11776.5	13006.8	6274.64	6660.77	8461.83	7717.22	6244.57	6244.57	6244.57	6244.57	6244.57	6244.57	6244.57	6244.57	6244.57	6244.57	6244.57	6244.57	16140.1	16864.3	16838.2	15946.4	17297.4	17086.8	6467.96	6478.2	6488.36	6502.79	6481.83	6459.35
870		46022.7	46089.1	42690.3	39995.2	42124.1	44891.6	4539.1	4795.05	5236.97	4931.27	4795.98	4895.12	3930.18	2430.14	2469.55	3994.95	4076.47	3124.49	2284.12	2633.75	2803.76	2748.89	3537.05	2691.58	1652.83	1652.83	1652.83	1652.83	1652.83	1652.83	1652.83	1652.83	1652.83	1652.83	1652.83	1652.83	9740.11	9826.47	10346.9	10361.5	9924.6	9946.13	15275.3	15260.7	15213.6	15227.2	15234	15225.6
871		54790.5	49725.5	47947.7	52260.2	46773.7	47042	42535.5	40631.4	41158	42483.7	44777	48906	24698.4	13687.4	19938.2	32351.1	24038.5	22752.8	20646.9	18724.6	26399.7	26697	32233.3	30699.3	14707.8	14707.8	14707.8	14707.8	14707.8	14707.8	14707.8	14707.8	14707.8	14707.8	14707.8	14707.8	7628.96	8044.29	8479.44	8519.14	8852.34	8588.56	13640.9	13699.7	13739.9	13647.3	13607.1	13607.4
872		51892.3	53410.7	51628.2	48397.9	49231.2	46771.9	20679.4	21457.2	20021.4	20640.9	23234.7	21328.8	12393.4	16176.9	14657.1	13036	7956.75	10372.7	15978.2	18567.2	21191.5	18214.3	12645.3	12280.1	10365.4	10365.4	10365.4	10365.4	10365.4	10365.4	10365.4	10365.4	10365.4	10365.4	10365.4	10365.4	9473.56	9614.91	9917.21	9505.55	8676.26	9083.95	11711	11708	11732.9	11701.8	11735.8	11737.2
873		53708.2	51770.7	43228.4	41986.3	49560.3	53481.1	7713.7	7868.21	7505.05	7430.72	6579.35	5546.07	2969.5	6869.04	5720.43	4996.07	7515.03	8197.43	6014.26	6296.17	6889.4	5577.85	3386.34	3691.14	3600.77	3600.77	3600.77	3600.77	3600.77	3600.77	3600.77	3600.77	3600.77	3600.77	3600.77	3600.77	17147.9	17416	17484.7	16445.6	15994.9	17562.6	9955.38	9903.52	9927.75	9972.64	9958.54	9917.28
874		27362.4	27627.1	27433.1	26621	26672.2	27184.5	28929.2	28659.6	28861.6	29224.8	28654.5	28451.9	10660.5	11315.5	14172.8	13954.8	12817.6	12424.1	11849.2	12025.2	13198.1	12831.6	12388.3	12011.5	7992.74	7992.74	7992.74	7992.74	7992.74	7992.74	7992.74	7992.74	7992.74	7992.74	7992.74	7992.74	14140.2	14730.4	15566	14564.2	14209.8	15103.3	7011.31	7022.67	7001.05	6969.21	7000.03	7021.26
875		33386.3	34573.7	35914	34273.6	33620.1	32991.8	4558.32	4831.86	4575.41	4409.77	4390.7	4337.09	3656.73	3608.16	3302.67	2868.78	3878.5	6325.21	3198.94	3029.58	5227.01	4374.54	3465.88	4471.78	3068.23	3068.23	3068.23	3068.23	3068.23	3068.23	3068.23	3068.23	3068.23	3068.23	3068.23	3068.23	18779.4	19560.4	19640.8	19107.4	19462.9	19484.9	7456.98	7451.98	7471.87	7466.31	7479.67	7471.47
876		26657.3	25091.8	21392.2	21809.5	21693.3	22589.9	35944.8	35899.6	36329.6	35446.3	35303.3	32394.6	17360.3	23506.8	26743.1	32193.3	22029.9	24879.6	24352.6	16063.7	17654.6	21466.5	17691.2	16921.2	14996.8	14996.8	14996.8	14996.8	14996.8	14996.8	14996.8	14996.8	14996.8	14996.8	14996.8	14996.8	16312.2	15511.7	14460.1	15126	14922.1	15965.7	5409.01	5355.34	5386.57	5403.83	5402.56	5404.13
877		56940.5	57501.1	57969.4	56381.3	56673.5	58530.8	9403.18	9379.39	9495.37	9379.43	9286.2	9388.93	10563.3	10279.8	10309.4	10482.8	10705.2	10710.8	10648.5	10189	10388.9	10712.4	10839.6	11554.2	6394.9	6394.9	6394.9	6394.9	6394.9	6394.9	6394.9	6394.9	6394.9	6394.9	6394.9	6394.9	20510.5	20737.7	21589.1	22002.5	20899.1	19744.6	6911.42	6928.55	6925.28	6907.66	6900.18	6933.48
878		36248.2	36745.7	30350	25463.9	24494.4	25799.4	18318.9	19171.5	17516.8	16763.2	18460.9	18159.7	9666.42	10656.8	9690.47	17678.9	23068.3	9073.42	7368.5	12356.6	12970.7	9131.97	12055.4	17510.9	7700.14	7700.14	7700.14	7700.14	7700.14	7700.14	7700.14	7700.14	7700.14	7700.14	7700.14	7700.14	9564.19	9537.46	8829.84	8822.61	9433.04	9349.63	14441.9	14449	14411.6	14393.5	14419.9	14418.9
879		43146.4	42996.9	42278.5	42383.8	46265.9	45304.1	60477.7	62468.4	62004.2	57923.3	57563.4	62055.8	72265.6	62910.7	57916.2	60141.6	62881.4	60284.3	58264.8	62822.4	60225.9	58513.8	70130.4	68941.2	36281.4	36281.4	36281.4	36281.4	36281.4	36281.4	36281.4	36281.4	36281.4	36281.4	36281.4	36281.4	17614.9	17072.5	16562	16534.3	15234.3	15894.7	3242.32	3238.29	3247.1	3242.98	3235.23	3234.85
880		45043.6	47925.5	45075.7	41302.8	42885.8	42297.4	7941.98	7817.19	7999.72	8400.68	7782.89	7489.86	4018.14	4697.23	3993.59	3783.36	3831.33	3663.35	4684.52	4215.31	3714.96	3520.54	3261.54	3424.72	3005.14	3005.14	3005.14	3005.14	3005.14	3005.14	3005.14	3005.14	3005.14	3005.14	3005.14	3005.14	15663.3	15722.4	15254.2	15202.4	14975.5	15004.6	9811.26	9773.68	9770.1	9807.56	9824.92	9774.82
881		47257.4	46143.6	47105.4	47073.7	47558.7	51112.2	259.287	248.041	253.726	270.355	275.949	267.714	269.966	267.389	309.671	280.143	232.273	280.042	278.224	212.782	244.308	249.764	240.345	281.298	145.662	145.662	145.662	145.662	145.662	145.662	145.662	145.662	145.662	145.662	145.662	145.662	9850.3	9669.3	8746.32	8641.19	9634.82	9644.2	5308.94	5306.68	5311.7	5317.69	5325.37	5328.69
882		9188.23	9716.64	10026.7	9261.7	9076.36	9389.49	10073.5	10413.7	10166.1	9089.5	9699.26	10816.9	6545.5	7134.42	10331.7	6198.48	4193.52	6080.78	6114.09	5055.07	4814.76	5223.61	7577.1	6690.59	4336.83	4336.83	4336.83	4336.83	4336.83	4336.83	4336.83	4336.83	4336.83	4336.83	4336.83	4336.83	13251.3	13004.8	12633.1	12518.7	12474.7	12695.2	8185.09	8170.45	8170.35	8198.19	8215.68	8213.2
883		59754.7	59590.9	60598.5	61529.7	61784.2	62527.3	23520.7	23354.7	23337	23024.1	23301.2	23597.6	26397.4	26692.6	27294	26603.3	26781.7	27169	27421.7	27263.4	26681	26823.8	27240.1	26904.5	15967.1	15967.1	15967.1	15967.1	15967.1	15967.1	15967.1	15967.1	15967.1	15967.1	15967.1	15967.1	18128.9	18148.2	17781.9	17435.6	17472	17568.1	8674.27	8680.49	8689.58	8688.9	8683.66	8687.91
884		61797.2	59363.9	54780	55738.2	60869.6	64345.9	52972.3	50205.6	54892.1	55658.8	56597.3	56544.2	58303.6	95643.3	54609.3	41580.8	37427.9	26070.2	41612.2	70170.8	66107.6	43796.2	45571.3	37413.4	23310.2	23310.2	23310.2	23310.2	23310.2	23310.2	23310.2	23310.2	23310.2	23310.2	23310.2	23310.2	14546.5	15220.9	15779.8	16136.6	16385.5	15495.7	12838.4	12800.6	12789.4	12827.3	12831.4	12846.9
885		42023.2	42948.1	55331.5	56960.8	48875.4	53767.9	12867.7	12121.4	12445.4	12490	10952.2	10532.2	9794.5	11016.2	7723.63	7598.57	9663.37	12308.3	14373.4	11274.3	5873.56	4942.31	6039.3	7029.62	4221.32	4221.32	4221.32	4221.32	4221.32	4221.32	4221.32	4221.32	4221.32	4221.32	4221.32	4221.32	14074.5	14366.8	14208.7	14561.3	15563.6	14656.9	3188.21	3193.97	3196.38	3199.94	3201.79	3203.66
886		19300.4	18725.5	18082.3	18631.1	19155.7	18877.3	36952.9	36657.9	36935.5	37779.8	37548.2	37206.5	40920.1	40244.9	38721.5	39524.7	40207.1	38016.3	36317.1	37609.7	43924.2	43253.1	38844.9	41398	29493.5	29493.5	29493.5	29493.5	29493.5	29493.5	29493.5	29493.5	29493.5	29493.5	29493.5	29493.5	14712.1	15769.2	16295.8	15105.4	15277	15283.7	8535.91	8525.05	8498.8	8498.02	8458.74	8493.45
887		31868.6	31896	32832.5	32349.1	32414	33906.9	2387.66	2303.59	2227.73	2233.06	2234.81	2265.17	1086.02	1358.4	1295.13	1121.9	1158.6	1203.23	1297.23	1029.89	875.843	1507.61	1676.24	1156.44	862.883	862.883	862.883	862.883	862.883	862.883	862.883	862.883	862.883	862.883	862.883	862.883	9187.89	9119.92	8911.49	8940.98	8897.34	8761.52	9120.88	9126.24	9123.85	9124.4	9124.61	9127.79
888		34172.8	37173.7	38497.6	37952.1	43336.9	41600.6	51665.5	49720.6	59402.2	61880.7	52745.9	51093.4	29167.6	30737.9	22042.4	29308.5	39101.3	21624.3	33590.4	48458.3	57411.3	58826.9	37216	31234.2	19091.3	19091.3	19091.3	19091.3	19091.3	19091.3	19091.3	19091.3	19091.3	19091.3	19091.3	19091.3	15934.6	16115.4	15795.8	14960.6	15092.4	15515.1	10304.3	10332.2	10322.1	10307.9	10352.7	10358.7
889		35980.3	36253.6	34627.8	34106.1	34155.2	34201.3	18890.3	18592.8	18516.7	18616.2	18596.4	18898	21073.6	20627.6	20791.4	20643.5	21875.8	21753.2	18892.2	19571.6	21749.1	19248.3	20057.9	21523.8	11385.1	11385.1	11385.1	11385.1	11385.1	11385.1	11385.1	11385.1	11385.1	11385.1	11385.1	11385.1	14964.7	14990.7	15333.5	15456.1	15402.2	15098.4	8761.02	8781.23	8777.11	8774.72	8783.63	8768.54
890		64238.9	60807.8	60127.4	57834.7	52921.6	56495.8	19072.3	20328.8	21299.6	20717.8	22020.1	21478	18713	15720.2	16206.8	21251.7	23328.8	18127.9	19500.5	23704.8	14853.6	14452.7	20567.5	15997	9677.89	9677.89	9677.89	9677.89	9677.89	9677.89	9677.89	9677.89	9677.89	9677.89	9677.89	9677.89	15845.1	15793	16461.6	15622.7	14463.1	16234.1	9037.96	8996.25	8930.64	8962.97	9048.63	9008.93
891		35760.3	33428	37173.2	42148.6	43560.5	39918	38597.8	37881.1	41885.5	47420.2	45656.9	45265.4	38408.4	31565.2	24266.8	27677.4	29374.3	27617	21963.8	25592.9	33033.7	39592.7	35684	23113.8	17561.4	17561.4	17561.4	17561.4	17561.4	17561.4	17561.4	17561.4	17561.4	17561.4	17561.4	17561.4	7294.7	7140.86	6489.48	6502.16	6972.87	6705.74	10146.3	10166.8	10078.2	10113	10093.1	10085.9
892		24268.8	24176.6	24093.6	24480.6	25225.2	25256.4	42674.2	41609.9	41207.3	42540.1	42544.2	42431.8	19472.8	18765.1	19886.5	19676.3	18388.4	19533	24740.1	20647.4	24595.1	24632	19723.9	20423.4	12701.8	12701.8	12701.8	12701.8	12701.8	12701.8	12701.8	12701.8	12701.8	12701.8	12701.8	12701.8	15094.3	15094.3	15094.3	15094.3	15094.3	15094.3	14851.6	14851.6	14851.6	14851.6	14851.6	14851.6
893		58161.8	57431.8	56283.4	56130.2	56319	53314.7	19443.7	20387.7	21708.2	21420.9	21722.6	24208.3	31769.3	22437.6	14698.6	14459.7	12173.5	11754.3	15116.4	17753.8	16040	16914.5	26215.6	25377.7	8520.73	8520.73	8520.73	8520.73	8520.73	8520.73	8520.73	8520.73	8520.73	8520.73	8520.73	8520.73	12934.3	13001	13128.8	13002.7	12887.3	12685.9	9075.25	9091.43	9143.03	9158.97	9139.44	9156.14
894		37404.6	36431.3	37860.7	39067.4	35261.7	36223.5	50877.3	50132.9	52700.6	51566.8	48858	50003.1	29987.1	29097.9	30472	33043.2	30646.2	29176.2	22346.5	22885	25790.2	26880.6	29595.5	30914.7	23299.3	23299.3	23299.3	23299.3	23299.3	23299.3	23299.3	23299.3	23299.3	23299.3	23299.3	23299.3	17968.3	17564.7	16226.4	16296.4	16051.5	16558.6	9391.35	9314.26	9311.16	9380.55	9372.53	9363.7
895		31029.6	31034.6	29947.8	30271.2	34263.3	31940.9	2417.72	2573.19	2597.01	2510.87	2610.88	2652.24	2616.25	3416.67	3860.81	3294.79	2612.97	2273.49	2396.27	2840.8	2600.48	3093.16	3384.05	2542.25	1390.58	1390.58	1390.58	1390.58	1390.58	1390.58	1390.58	1390.58	1390.58	1390.58	1390.58	1390.58	14594.1	14820.8	16773.4	17936.8	16249.3	13693.2	9313.72	9443.57	9502.57	9438.03	9362.74	9389.96
896		59022.7	56277.1	51379.5	50365.9	54080.4	55910.5	45309.3	44817	44103.1	47266.7	42626.9	40676.2	29856.4	30586.4	37050.9	36643.9	25066.7	20638.8	21975.6	27644.9	29175.3	32313	36277.6	20867.9	14655.9	14655.9	14655.9	14655.9	14655.9	14655.9	14655.9	14655.9	14655.9	14655.9	14655.9	14655.9	13260.4	12740	13909.8	14321.3	13140.5	13246.3	6416.97	6405.48	6417.94	6456.18	6453.31	6459.49
897		39693.4	40049.4	36993.5	34531.5	37986.6	38569.4	36209.3	36386.1	39549.4	39259.7	39183.4	41580.7	35473.7	23390.3	22991.9	22750	19966.6	25098.2	28345.2	32947.7	37148.4	39430.3	42552.1	40238	20486.8	20486.8	20486.8	20486.8	20486.8	20486.8	20486.8	20486.8	20486.8	20486.8	20486.8	20486.8	20420.4	19829.4	19476.4	20226.4	21090.6	20825.9	6987.99	6995.52	7017.98	7044.59	7051.02	7000.59
898		12155	11917.2	11940.9	11871.9	12160.3	12356	39129.3	39483.2	37595	38209.3	36705.9	37062.8	23299.3	22454	22850.1	20108.4	16268.7	14768.6	19246.3	20211.1	22459.3	21133.3	18089.3	23811.9	13014.9	13014.9	13014.9	13014.9	13014.9	13014.9	13014.9	13014.9	13014.9	13014.9	13014.9	13014.9	13571.3	13564.4	13458.7	13488	13380.8	13246.1	10392.1	10404.1	10481.1	10499.2	10467.3	10452.5
899		49593	49608.2	50899.3	49615.8	47629.5	51762.3	184.843	173.124	185.892	193.046	212.289	231.1	203.494	166.123	208.78	124.732	135.91	166.35	116.64	153.216	167.685	134.463	143.594	154.995	77.2532	77.2532	77.2532	77.2532	77.2532	77.2532	77.2532	77.2532	77.2532	77.2532	77.2532	77.2532	20432.8	19604.3	18693.6	20181.2	21208.3	20815.3	10114.3	10090.1	10039.5	10080.7	10081.4	10082.3
900		42378.4	37792.5	35189.3	39507.3	45735.7	50585.9	837.309	769.027	816.243	816.589	718.159	667.501	315.108	631.102	787.079	578.594	825.81	944.223	708.157	624.857	451.963	356.716	618.016	701.049	443.883	443.883	443.883	443.883	443.883	443.883	443.883	443.883	443.883	443.883	443.883	443.883	9765.12	9629.67	9346.48	9641.84	10141.1	9583.36	4014.73	4024.37	4019.6	4015.74	4012.34	4009.89
901		47775.4	48754.5	48413.6	46200.9	44781.9	44652.5	33710.4	34040.4	34301	34544.7	32104.8	33198	41130.9	38315.1	32637.8	32798	37249.6	35202.8	33116.2	33014.9	34514.4	35861.6	37164.5	36560.2	19758.7	19758.7	19758.7	19758.7	19758.7	19758.7	19758.7	19758.7	19758.7	19758.7	19758.7	19758.7	8955.59	8843.68	8693.77	8671.96	8318.2	8412.53	1704.44	1707.06	1702.71	1700.88	1699.34	1694.21
902		19032.9	20187.3	19954.3	18894.2	19367.2	18449.3	16516.4	17789.1	17798.8	16358.1	15427.7	16264.3	11947.1	9675.52	12615.8	20973.9	13812.8	5766.17	6878.12	16314	11854	5667.83	7894.3	10333.8	7013.56	7013.56	7013.56	7013.56	7013.56	7013.56	7013.56	7013.56	7013.56	7013.56	7013.56	7013.56	21573.6	21299.7	20636.7	20836.7	21681	22049.4	8773.51	8767.67	8786.62	8775.78	8768.9	8781.4
903		51403.8	50966.3	51247.8	52813.3	56809.2	56300.9	226.019	229.553	227.585	213.397	205.725	220.658	219.144	200.084	187.613	178.81	183.122	187.05	197.245	202.095	208.906	239.079	196.129	163.85	116.551	116.551	116.551	116.551	116.551	116.551	116.551	116.551	116.551	116.551	116.551	116.551	13037.8	12968.5	13186.4	13934.5	13575.3	13494.8	12542.6	12535.7	12515.9	12454.7	12459.2	12449.4
904		57478.5	55630.2	52578	58939.2	69077.9	62234.8	20888.1	21618.9	21800	20421.6	19348.3	20418.9	16682.6	16990.3	17530.1	17725.4	21845.5	23728.3	20454.2	20310.5	17837.2	18527.6	16111.4	15238.3	12985.1	12985.1	12985.1	12985.1	12985.1	12985.1	12985.1	12985.1	12985.1	12985.1	12985.1	12985.1	11965.7	12147.6	12624.9	12757.7	12896.5	12744.4	11529.4	11511.2	11516.9	11530.8	11532.5	11529.4
905		46024.5	50136.2	48513.2	39401	39716.2	44662.2	8948.16	8160.13	8807.86	9476.5	9496.66	9684.34	6616.35	7586.74	7083.41	5148.51	3382.86	3677.83	6143.4	7475.13	6258.52	8606.48	12975.1	7613.13	4180.35	4180.35	4180.35	4180.35	4180.35	4180.35	4180.35	4180.35	4180.35	4180.35	4180.35	4180.35	15947.6	16806.1	16108.5	14792	15473.9	15883.4	14755.2	14767.3	14731.3	14801.4	14831	14727.5
906		56586.4	55223.3	56160.9	56237.6	59009.3	57076.9	470.084	499.721	493.259	512.811	516.167	510.2	575.05	439.433	300.13	349.482	671.156	833.928	560.581	456.095	463.436	481.49	497.259	439.511	241.631	241.631	241.631	241.631	241.631	241.631	241.631	241.631	241.631	241.631	241.631	241.631	15086.5	14910.1	13843.9	13963.7	13798.1	13361.6	3908.21	3902.2	3904.37	3906.25	3892.25	3901.12
907		18902.7	17286.1	15903.6	16156.5	15960.4	16894.6	7131.98	6798.65	6614.59	6936.82	7279.78	7558.12	6190.82	5701.84	4210.69	3279.15	3017.33	3604.91	3980.29	4090.44	4963.15	4985.96	4143.89	3411.24	2671.64	2671.64	2671.64	2671.64	2671.64	2671.64	2671.64	2671.64	2671.64	2671.64	2671.64	2671.64	11514.6	11570.2	11444	11103.9	11733.3	12219.9	13912	13937.1	13900.1	13849.4	13856.7	13881.4
908		20200.7	19810.6	20102.5	20626.1	20867.3	20170.9	2450.59	2403.06	2428.8	2464.12	2410.85	2493.41	1909.37	1674.92	1133.81	1332.47	1707.97	1796.73	1612.17	1438.61	1580.03	2325.12	2097.56	1946.86	1199.67	1199.67	1199.67	1199.67	1199.67	1199.67	1199.67	1199.67	1199.67	1199.67	1199.67	1199.67	9602.76	9576.42	9280.58	9461.89	10210.6	10074.6	10668.9	10630	10664.9	10739.7	10727.4	10659.3
909		42606.1	40985	39686.5	39350.5	40123.7	43936.3	33742.9	32119.2	36024.5	35515.4	34842	36549.8	22905.1	17217.1	20217.8	21713.3	22605.7	20135.7	15746	17775.1	20227.9	21661.3	33564.1	38814.7	15586.9	15586.9	15586.9	15586.9	15586.9	15586.9	15586.9	15586.9	15586.9	15586.9	15586.9	15586.9	14258.8	14675.2	15506.9	15122.6	14785.5	14649.7	6990.41	6999.96	7000.66	6991.26	6981.78	7000.31
910		27209.8	28091.5	26968.4	25505	27115.8	29515.8	15913.2	15247.4	17717	16875.5	15183.8	16592.6	10597.2	9639.29	10430.8	7540.47	8197.84	10628.6	19361.4	20947.7	13809.5	10553.7	9511.03	11011.8	7837.36	7837.36	7837.36	7837.36	7837.36	7837.36	7837.36	7837.36	7837.36	7837.36	7837.36	7837.36	19255.7	19418	19869.2	19239.5	18600.8	18786.2	7639.77	7661.9	7653.63	7633.45	7630.12	7635.28
911		27363.7	28280.4	25948.2	24809	27427	27753	12846	12336.9	11797.2	11905.4	11779.6	12642.4	10109.3	9369.81	10741.3	6293.17	6748.38	7286.06	6624.33	8643.52	7938.56	9198.36	8519.83	7215.97	5100.96	5100.96	5100.96	5100.96	5100.96	5100.96	5100.96	5100.96	5100.96	5100.96	5100.96	5100.96	11519	11442.3	11521.4	11453.2	11436.2	11396.8	11821.1	11853.7	11855.2	11847.1	11848	11825.5
912		44824.1	45340.7	44571.2	44106.7	45051	44940.9	37233.2	37443.8	37799.1	37960	38231.2	37815.5	48762.2	48177.7	47701.6	47830	48939.4	49329.9	48354.5	47675.1	48498.6	49199	49100.1	48638.5	28249.3	28249.3	28249.3	28249.3	28249.3	28249.3	28249.3	28249.3	28249.3	28249.3	28249.3	28249.3	10421.5	10377.1	10663.9	10858.1	10591.7	10470.6	12120.2	12125.2	12127.1	12106.4	12099.8	12134
913		40799.4	36513.9	36165.3	42092.3	39185.5	38195.9	6764.03	6854.21	6854.53	6695.21	6980.23	7223.85	6751.35	7450.64	8579.71	6755.12	6626.82	9162.21	6310.16	5370.01	5149.54	4365.03	5592.08	6334.87	3907.79	3907.79	3907.79	3907.79	3907.79	3907.79	3907.79	3907.79	3907.79	3907.79	3907.79	3907.79	7918.8	7794.09	7616.7	8067.38	8576.23	8165.93	4200.58	4204.36	4197.19	4198.48	4206.01	4193.29
914		47057.4	50289.8	52283.7	51858	55781.7	51633	33372.5	33683.1	35054.6	36232.1	33863.8	32760.8	22741	25473.5	20911.1	18835.7	25426	35491.8	56327.3	45696.1	29940.2	26304.5	24268.4	31223.6	21792.9	21792.9	21792.9	21792.9	21792.9	21792.9	21792.9	21792.9	21792.9	21792.9	21792.9	21792.9	11551.1	11271.6	11544	11482.5	10997.1	11188.3	11277	11301.8	11329.2	11282.9	11291.2	11335.1
915		56367.6	58606.7	58024.8	55369.5	55161.6	54701	50564.4	50167.5	50930	51965.6	50488.4	49768.5	54471.9	52687.7	45367.4	47192.4	48823.7	48051.3	49302.7	46598.5	43688.4	46951.6	52770.6	52005.5	29469.8	29469.8	29469.8	29469.8	29469.8	29469.8	29469.8	29469.8	29469.8	29469.8	29469.8	29469.8	17136.2	17819.9	18034.8	17106.6	17751.7	18242.9	8740.6	8746.14	8745.9	8735.95	8688.69	8681.56
916		39519.4	39305.9	39703.6	40023.8	40631.5	40346.4	2645.33	2689.16	2626.21	2592.98	2664	2648.98	2800.76	2875.77	2883.96	2902.25	2913.47	3004.87	2819.3	2736.22	2900.05	2883.27	2913.64	2892.6	1662.31	1662.31	1662.31	1662.31	1662.31	1662.31	1662.31	1662.31	1662.31	1662.31	1662.31	1662.31	16275.2	15850.1	17083.1	19016.8	18194.9	18051.8	11076.3	11038.5	11035.8	11049.3	11040.4	11009
917		56602.5	59571.4	66259.1	60481.1	58350.3	58372.5	24470.1	26915	26775.6	25412.7	26406.9	24440.7	16954.4	20132.6	21522.5	27033.8	35936.7	26905	19983.9	21300.5	23989.1	26050.4	22283.6	23314.5	15171.7	15171.7	15171.7	15171.7	15171.7	15171.7	15171.7	15171.7	15171.7	15171.7	15171.7	15171.7	12449.7	12075.1	11652.8	12757.9	13717.8	13268.3	11383.8	11350.6	11312.8	11302.8	11333.4	11316
918		23414	24216.5	24518.5	24169.3	21726.8	19937.3	45264.6	46997.6	45135.2	44625.4	47977.4	47348.7	42190	62946.4	46006	37490.7	35867.4	35740.9	33889.6	30366.2	36023.5	41410.4	42197.5	35675	28732.6	28732.6	28732.6	28732.6	28732.6	28732.6	28732.6	28732.6	28732.6	28732.6	28732.6	28732.6	10365.9	10515.4	10664.9	11166.5	11709.5	11843.8	8444.25	8425.64	8437.86	8379.84	8418.35	8475.91
919		25567.3	25697	23006.4	22011.2	23626.1	24895.2	2935.96	2768.64	2454.55	2485.98	2668.08	2642.38	1566.55	2360.6	1947.04	1558.94	1419.66	1373.69	1870.15	2138.14	1777.05	1129.4	1063.36	1306.33	959.975	959.975	959.975	959.975	959.975	959.975	959.975	959.975	959.975	959.975	959.975	959.975	14349	14208.8	13745.6	14044.3	14314.3	14738.8	5263.45	5252.45	5272.82	5269.45	5257.8	5233.06
920		45859	46839.5	42230.9	41624	51859.6	50440.6	7634.91	7992.59	7924.7	7457.39	7088.33	6939.01	3564.56	4903.33	5897.62	7057.49	5760.31	3259.09	3349.02	4886.39	7749.7	7373.33	6990.41	5679.54	2717.58	2717.58	2717.58	2717.58	2717.58	2717.58	2717.58	2717.58	2717.58	2717.58	2717.58	2717.58	13770.1	14125.7	13550.3	13577.6	13753.4	12883.5	6372.1	6377.03	6394.84	6402.09	6384.79	6378.04
921		54772.2	48601.5	46012	52582.6	57228.4	55441.2	7251.12	7311.41	5998.46	6148.81	6527.98	6185.07	3051.2	4160.83	4786.8	6128.33	5096.35	3663.21	5154.38	5560.3	4650.32	6047.79	5098.06	5273.21	4523.46	4523.46	4523.46	4523.46	4523.46	4523.46	4523.46	4523.46	4523.46	4523.46	4523.46	4523.46	15589.1	15237.7	14304	14184.9	14521.6	14128.2	6438.04	6486.62	6505.49	6452.24	6437.28	6442.95
922		18169.1	18585.3	17963.1	16744.1	17419.8	16921.6	11753.9	12282.9	12631.2	12533.5	12945.8	12935.8	9866.43	9727.95	11584	12437.7	7761.81	8508.83	11941.9	15267.1	17072.7	10806.7	9141.23	10697.2	7203.12	7203.12	7203.12	7203.12	7203.12	7203.12	7203.12	7203.12	7203.12	7203.12	7203.12	7203.12	18291.2	17959.3	18213.6	17568.3	18284.7	19733	7249.13	7222.3	7178.72	7222.25	7233.19	7217.62
923		35048.3	35754.2	31616.5	31477.6	32483.9	30241.2	15495	15200.3	17441.5	18198.1	16408.5	17713.2	18158.8	11069.7	11070.5	10505.7	9115.65	10166.8	11484.1	11593.8	9958.23	10800.8	11592	10793.6	7428.39	7428.39	7428.39	7428.39	7428.39	7428.39	7428.39	7428.39	7428.39	7428.39	7428.39	7428.39	18959.7	18672.5	18322.5	19100.3	18974.6	17980.1	12826.2	12865.1	12887.1	12907.5	12954.1	12876.4
924		49082.3	47287.4	46133.3	47327.8	46173.9	45469	7904.39	7989.01	8230.08	8436.25	7646.24	7930.3	9545.69	8316.01	7607.74	7096.88	6836.68	7415.1	7921.96	8032.5	8647.36	7273.81	6368.04	7246.62	4672.47	4672.47	4672.47	4672.47	4672.47	4672.47	4672.47	4672.47	4672.47	4672.47	4672.47	4672.47	11530.4	11530.9	12005.6	12222.6	12659.3	12054.4	10016	10080.2	10058	10011.9	10027.4	10065.2
925		19364.2	17940.5	18389.1	19064	17568.3	18802.9	3578.75	3539.59	3474.89	3468.17	3349.07	3409.62	2379.67	2487.52	2352.86	2082.47	2992.53	3810.77	2727.04	2037.45	2347.16	2732.64	2051.7	2280.6	1043.35	1043.35	1043.35	1043.35	1043.35	1043.35	1043.35	1043.35	1043.35	1043.35	1043.35	1043.35	6375.37	5695.44	4893.94	5134.65	5338.09	5494.31	10501.1	10532.2	10531.8	10477.9	10514	10555.5
926		56705.3	50665	53125	54886.7	47404.2	53472	14420.2	13888.7	13446.5	13710.2	14211.5	13941.2	10971.3	13369.9	11589.7	12485.1	14421	12653.8	11568.2	15002.4	13288.7	9986.88	10934.2	10677.8	5818.23	5818.23	5818.23	5818.23	5818.23	5818.23	5818.23	5818.23	5818.23	5818.23	5818.23	5818.23	15203.4	15455	15141.9	15188.6	14954.5	13275	1304.55	1313.39	1315.46	1311.44	1311.65	1313.44
927		14847	14917.2	15180.6	15270.7	15266	15100.1	2340.12	2343.28	2296.11	2291.39	2337.32	2367.67	3005.67	2930.24	2873.4	2916.26	2934.93	2974.81	3033.78	2966.61	2864.74	2953.25	2989.65	2937.41	1759.99	1759.99	1759.99	1759.99	1759.99	1759.99	1759.99	1759.99	1759.99	1759.99	1759.99	1759.99	16980.9	17226.2	17614.3	17418.7	17510.2	18074.4	5632.05	5621.74	5627.04	5625.61	5617.1	5636.89
928		58903.5	59839.1	57090.7	55590.7	59558.2	62785.6	6.92659	6.31333	6.92203	7.7174	7.18929	7.12972	7.12094	6.41679	4.72598	5.8528	7.46471	5.65689	3.06642	4.16546	11.2564	4.92425	2.7586	3.35649	3.10004	3.10004	3.10004	3.10004	3.10004	3.10004	3.10004	3.10004	3.10004	3.10004	3.10004	3.10004	8763.61	8605	8375.63	7860.28	7572.68	8476.53	9842.19	9778.27	9736.4	9768.64	9762.35	9820.92
929		26649.7	25501.2	22514.3	21559.5	25843.1	31039	39944	37232.9	37654.5	38981.2	42770.4	40403.4	23373.1	21576.8	20864.1	18328	11595.4	17956.5	33407.1	22836.2	21225.4	31544.2	32826.1	28415.2	11824.3	11824.3	11824.3	11824.3	11824.3	11824.3	11824.3	11824.3	11824.3	11824.3	11824.3	11824.3	17075	16785.5	16741.3	16900.9	17000.1	17001.8	2705.62	2707.92	2709.68	2712.12	2710.82	2710.71
930		60911.1	62845.3	66246.9	66552	67847.9	64896.1	27969	28173.2	27524.3	26814.5	27524	29188.9	34435.7	32981.3	29284.4	28410.2	25838.1	25959.4	35511.2	30076.2	25550.2	26834.8	23958.1	24383.3	16292.2	16292.2	16292.2	16292.2	16292.2	16292.2	16292.2	16292.2	16292.2	16292.2	16292.2	16292.2	7908.55	7533.74	7385.37	8137.09	8161.73	7902.08	7899.86	7886.08	7885.5	7901.85	7901.48	7886.59
931		45556	41813.6	39442.7	45386.2	56337.6	56852.8	27611.4	27231.2	24632.8	23656.2	23467.3	22961	17721.7	18863	20132.1	23030.9	21334.9	17696.4	16655.6	20823.1	20787.4	23547.1	23775.4	18632.5	11580.6	11580.6	11580.6	11580.6	11580.6	11580.6	11580.6	11580.6	11580.6	11580.6	11580.6	11580.6	14755.9	15100.5	16426.2	16288	16162.1	16176.9	13183.5	13160.2	13156.7	13156.5	13147.5	13137.4
932		55620.3	55053.8	55502.6	56460.3	54361.4	54679.6	29175.5	28963.9	27870	28418.3	28689.9	27562.8	25489.6	25506.6	28365.7	28319.6	22640.2	23143.8	29796.5	31331.9	27115.2	29004.8	35267.4	31788.9	15972.6	15972.6	15972.6	15972.6	15972.6	15972.6	15972.6	15972.6	15972.6	15972.6	15972.6	15972.6	8461.88	8461.88	8461.88	8461.88	8461.88	8461.88	8756.16	8756.16	8756.16	8756.16	8756.16	8756.16
933		29106.4	29426.1	28194.6	30050.5	36753	33895.7	38165.2	38680.4	36950.2	36315.4	35760.6	35369.2	26279.1	26571.2	17559	20430.5	23376.7	45320.5	48486.5	27257.4	23254.6	28442.2	36440.9	23934.6	19078.4	19078.4	19078.4	19078.4	19078.4	19078.4	19078.4	19078.4	19078.4	19078.4	19078.4	19078.4	10272.2	10272.2	10272.2	10272.2	10272.2	10272.2	6991.53	6991.53	6991.53	6991.53	6991.53	6991.53
934		14064.2	13794.8	13825.5	15005.9	17077	15731.4	11503.4	11954.3	11056.9	11349.3	11154.2	11381.4	7941.19	4447.26	4345.77	5455.11	9230.92	8841.26	5365.21	6363.96	7182.81	7320.81	8200.59	8588.85	5400.42	5400.42	5400.42	5400.42	5400.42	5400.42	5400.42	5400.42	5400.42	5400.42	5400.42	5400.42	10001.9	10079.4	10155.9	10013.5	9979.8	10023.5	6110.08	6112.45	6110.75	6112.03	6116.06	6109.91
935		14475.5	13905	14650.5	14204.4	11483.7	12304.5	52119	54001.8	57619.5	58059.3	57635.9	53591.8	21145.7	22060.1	24263.2	24561.1	33803.2	31265.3	29941.9	24092.3	35419	49233.9	46650.6	29636.1	11704.4	11704.4	11704.4	11704.4	11704.4	11704.4	11704.4	11704.4	11704.4	11704.4	11704.4	11704.4	15971.9	16237.7	14545.5	13349.7	14129.4	15102.6	4781.76	4780.85	4794.33	4782.29	4796.44	4802.24
936		19673.2	18844.7	18209.9	19005.7	18587.8	17900.5	1972.96	2046.4	2000.76	1899.14	1851.21	1918.57	797.039	813.056	1576.34	1928.33	1273.55	1006.05	855.361	758.219	850.717	1047.08	1035.76	1132.71	563.114	563.114	563.114	563.114	563.114	563.114	563.114	563.114	563.114	563.114	563.114	563.114	19556.5	19298	19505.6	20760.9	19793.4	17977.4	9760.01	9783.25	9822.58	9800.77	9815.74	9862.46
937		52094.3	52970	49342.6	46024	48791.8	49880.6	9216.96	9792.97	10273.7	9813.13	9900.76	10273.5	12893.9	9815.01	7296.25	7609.8	7139.41	8323.75	9614.01	8116.05	8202.06	7149.2	7626.25	8582.05	6620.13	6620.13	6620.13	6620.13	6620.13	6620.13	6620.13	6620.13	6620.13	6620.13	6620.13	6620.13	5714.8	5695.63	5636.49	5856.77	5946.58	5895.15	11466.9	11450.6	11457.4	11435.9	11412.2	11407.3
938		34697.1	34855.9	36416	35106.7	29152.3	26834.2	14190.3	15814.8	14970	14355.9	13951.2	13451.2	8530.21	9068.17	8228.39	12774.1	16951.6	16346.3	10806.3	8872.51	9254.82	6618.81	6613.74	8719.4	4856.7	4856.7	4856.7	4856.7	4856.7	4856.7	4856.7	4856.7	4856.7	4856.7	4856.7	4856.7	14013.3	14355.2	14750.7	14100.4	13935.5	14512.8	12343.2	12298.6	12351.1	12416.9	12382.9	12331.7
939		57897.2	60736.9	63749.2	61791.4	61484.4	60528.8	20448.5	20175	20188.5	20989.2	22501.3	20790.6	9269.69	12082.9	10336	11320.2	14957.3	11611.8	12355	16922.4	14598.7	14688.7	19499.2	23118.2	10514.8	10514.8	10514.8	10514.8	10514.8	10514.8	10514.8	10514.8	10514.8	10514.8	10514.8	10514.8	12371	12357.8	12390.1	12442.6	12399.6	12372.9	12456	12456.2	12456.3	12455.9	12457.7	12453.6
940		32675.8	33951.7	35138	34051.9	36278.6	34313.7	2672.92	2763.05	2726.2	2742.89	2659.61	2676.4	1489.01	1336.08	1683.86	2449.72	3110.17	2202.28	1462.63	1644.16	1695.6	1201.7	1346.77	1694.77	908.167	908.167	908.167	908.167	908.167	908.167	908.167	908.167	908.167	908.167	908.167	908.167	7112.32	7138.66	7140.4	7045.73	6946.92	6991.32	2716.22	2716.91	2717.22	2716.53	2718.92	2718.14
941		37239.7	36431.8	36782.9	36679.7	36228.6	38260.7	4400.19	4265.38	4395.38	4496.42	4433.65	4391.56	4749.19	4435.15	4636.29	5147.39	4243.97	4010.92	4154.21	4274.07	4549.08	4955.89	5285.72	4859.66	2681.77	2681.77	2681.77	2681.77	2681.77	2681.77	2681.77	2681.77	2681.77	2681.77	2681.77	2681.77	19209.1	20189.5	20470.2	18865	19454.2	20575.8	7203.54	7223.51	7225.55	7183.57	7174.89	7187.96
942		45334.6	44078.6	45970.2	50937.4	50777.9	45715.7	2988	3005.25	2974.86	3107.84	3163.64	3119.1	3408.79	3292.08	2453.58	2702.24	2622.12	2956.11	3877.78	3455.52	2967.95	2369.49	2554.39	3103.76	1990.54	1990.54	1990.54	1990.54	1990.54	1990.54	1990.54	1990.54	1990.54	1990.54	1990.54	1990.54	10703.8	10734.9	10782.5	10750.5	10807.2	10647.9	3930.75	3947.29	3935.15	3926.94	3941.69	3947.13
943		24504.6	23057	22928.3	25235	24008.5	26548.2	22587.8	21788.6	22790.6	21316.6	18069.8	17514.8	11189.8	12569.9	14083	16906.8	24774.3	21529.7	17760	16873.5	10328.1	13692.5	29583	18386.2	11785.8	11785.8	11785.8	11785.8	11785.8	11785.8	11785.8	11785.8	11785.8	11785.8	11785.8	11785.8	10228.4	10603.1	11063.9	10695	9923.41	9931.23	11901.6	11864.9	11822.9	11877.9	11902.4	11882.6
944		29406.3	27896.8	27259.6	28339.5	27572.9	27931.4	50513.4	49714.9	46046	44859.3	46852	49214.2	32620.3	35781.3	33272.7	33759.8	33787.7	27617.5	27079.4	33731	34714.6	24837.1	24811	36961.7	20850.3	20850.3	20850.3	20850.3	20850.3	20850.3	20850.3	20850.3	20850.3	20850.3	20850.3	20850.3	6054.74	6349.01	6874.76	6594.54	6642.08	6667.47	8182.12	8200.68	8219.19	8231.76	8152.79	8146.63
945		32087.8	29516	30448.5	31094.7	30507.1	36809.4	23906	21821.5	19922.2	22105.4	21744.5	21118.9	18570.8	10996.4	15067.1	21557.2	13350.3	9893.43	15233.7	13786.2	10020.9	9469.46	13548.7	13914.6	8364.04	8364.04	8364.04	8364.04	8364.04	8364.04	8364.04	8364.04	8364.04	8364.04	8364.04	8364.04	14877.2	15248.5	16029.4	15629.5	14309.5	13937.4	4824.42	4830.86	4831.29	4839.21	4831.82	4818.29
946		66192.3	68642.9	63433.5	56648.2	56739.9	54600.7	8191.79	9150.05	10572.3	9729.05	7939.21	8464.72	6725.47	5729.51	4271.47	3406.01	5135.37	9603.65	5552.71	5692.23	7264.74	7041.52	7429.02	7184.21	3746.78	3746.78	3746.78	3746.78	3746.78	3746.78	3746.78	3746.78	3746.78	3746.78	3746.78	3746.78	10907.1	11074.3	11580.5	11839.6	11648.7	10994.6	11305.5	11284.3	11361	11355.5	11353.6	11402.4
947		61609.6	64702.9	65947.4	62928.4	56655.6	55268.8	53165.7	53831.7	50831.6	51517.7	52570.3	48975.7	37320.3	41960	45544.5	48244	53043.7	48062.4	40834.2	49515.3	52272.2	39699.4	40828.4	43874.9	21939.7	21939.7	21939.7	21939.7	21939.7	21939.7	21939.7	21939.7	21939.7	21939.7	21939.7	21939.7	18458	17256.4	15277.8	16753.4	20335.1	18777.8	10415.6	10454.9	10483.1	10495.5	10489.9	10468
948		46940.9	47740.7	48467.6	46055.8	46584.2	48535.9	35435.2	35844.1	35983.8	34265.4	35267.7	36799.5	18243.4	20914	26725.9	24429.7	26265.6	20488.5	17641.5	19158.1	16192.9	16720.2	17247.1	24547	20778.9	20778.9	20778.9	20778.9	20778.9	20778.9	20778.9	20778.9	20778.9	20778.9	20778.9	20778.9	11267.8	11145.7	10981.1	11276.4	11495.7	11494.3	11290.4	11267.6	11274.7	11292.4	11286.6	11287.3
949		32181.7	30227.3	25282	25312.8	26777.5	26591.7	41612.3	42913.4	42157.1	44045.9	47202.7	46278.1	28486.5	23528.2	33753.5	28551	25555.7	23303	24695.8	32190.1	23858.5	15924.4	18195.9	32633.1	20808.4	20808.4	20808.4	20808.4	20808.4	20808.4	20808.4	20808.4	20808.4	20808.4	20808.4	20808.4	10434.2	11009.7	11050.7	10576.1	10588.2	10291.6	7375.53	7371.38	7381.81	7422.02	7443.95	7378.37
950		45893.1	48166.3	44103.1	39713.1	37026.6	32662.3	27281.9	30865.8	31447.2	29351.9	28305.3	30349.5	26103	27489.1	20778.3	21540.8	27552.5	26755.9	17493.1	10094.1	14765.3	19132.4	19854.5	23526.6	13266.5	13266.5	13266.5	13266.5	13266.5	13266.5	13266.5	13266.5	13266.5	13266.5	13266.5	13266.5	10754.3	11355.6	11061.8	9796.67	9283.6	9498.95	13109	13106.5	13066.1	13120	13093.9	13102.8
951		54398	51383.3	47666.3	48525.4	49277.1	52492	31996	32957.5	32550.4	28117.1	28752.4	31208.4	23732.7	21782.2	19911.6	17580.6	16822.5	21990.2	25863.9	26865.6	33620.1	24958.5	21384.1	30797.6	20086	20086	20086	20086	20086	20086	20086	20086	20086	20086	20086	20086	13589.7	13415.8	13915.1	14608.4	14212.1	14031.5	2749.44	2745.49	2743.86	2748.23	2748.67	2745.87
952		46437.5	46169.8	43805.6	47736.2	49842.2	43308.5	34236	33694	38155.1	38605.3	37956	37799	28065.4	29559.9	30605	30087.7	26157.3	25932.6	26577	28503	25484.6	29927.2	30234.4	23955.4	15757.2	15757.2	15757.2	15757.2	15757.2	15757.2	15757.2	15757.2	15757.2	15757.2	15757.2	15757.2	19713.6	18407.5	17981.6	18899.7	20884	21119.2	10114.7	10126.9	10181.3	10177.6	10125.3	10154.4
953		33831.2	32778.8	32769.8	33673.2	33932.6	34309.6	5564.48	5597.08	5673.9	5762.31	5875.21	5871.56	6663.24	6693.01	6683.33	5860.43	5718.36	6253.11	5940.08	5894.46	6418.89	5476.17	5310.53	6511.82	3611.79	3611.79	3611.79	3611.79	3611.79	3611.79	3611.79	3611.79	3611.79	3611.79	3611.79	3611.79	16133.8	15505.7	17103.6	18761.6	16924.8	16551.5	15031.2	14973.4	14974.4	15037.1	14979.9	14917.4
954		48188.5	47565.4	43891.4	40274.8	37958.2	42055.8	22234.5	20245.3	20215.3	21351	20135	20655.2	22892.7	16856.5	13157.5	22709.4	21779.2	19831.4	18606.9	21927.3	20832.1	15635.3	17917.9	23186.9	12522.1	12522.1	12522.1	12522.1	12522.1	12522.1	12522.1	12522.1	12522.1	12522.1	12522.1	12522.1	12391.4	12359.6	12375.6	11796.3	12457.4	13428.6	12407.1	12415.2	12387.4	12347.8	12359	12381.7
955		50383.3	52193.8	55610.1	54511.9	53705.9	54611.7	19922	19725.3	19034.6	19329.8	18924.9	19650.2	21838.9	15024	12408.2	10795.2	6877.92	11168.3	14499.5	13770.3	13732.2	13308.3	13268.7	15792.2	7775.55	7775.55	7775.55	7775.55	7775.55	7775.55	7775.55	7775.55	7775.55	7775.55	7775.55	7775.55	19161.6	18682.3	17967.9	18094.8	18806.3	19408.9	6050.53	6057.94	6047.11	6016.48	6015.88	6029.08
956		22321.3	22124.9	23432.7	24693.5	26037	26234.5	920.822	870.247	895.775	924.671	915.909	887.679	441.733	538.105	562.229	641.2	471.444	506.37	630.996	649.478	682.32	632.673	811.789	616.446	299.842	299.842	299.842	299.842	299.842	299.842	299.842	299.842	299.842	299.842	299.842	299.842	16163.6	16179.7	15934	16019.8	16543.2	16374	14127.2	14138	14146.8	14122.6	14123	14131.9
957		54835.1	57888.9	57660.2	50954.9	52920.7	59371.6	6433.23	6102.19	5521.65	5711.21	5910.21	6056.43	5986.69	5089.59	5731.42	5043.25	5367.84	5476.3	5215.82	5925.07	4958.9	5658.74	6963.9	6832.5	3608.68	3608.68	3608.68	3608.68	3608.68	3608.68	3608.68	3608.68	3608.68	3608.68	3608.68	3608.68	11423.6	11735.1	12354	11997.7	12139.3	12337.6	4911.16	4902.03	4920.24	4935.61	4940.42	4928.34
958		66431.2	60720.9	58507.8	62439.2	66294.1	67358.4	17377.4	18520.1	20101.5	20155.1	18797.8	16398.8	11564.4	17299.2	16564.1	19757.6	20392.2	13684.1	9283.42	9517.03	12147.5	13392.9	9222.1	8981.5	6281.67	6281.67	6281.67	6281.67	6281.67	6281.67	6281.67	6281.67	6281.67	6281.67	6281.67	6281.67	11613	11105.8	10627.7	11809.1	12487.6	11660.7	8893.29	8900.52	8899.2	8896.47	8909.22	8908.83
959		27061.2	27061.2	27061.2	27061.2	27061.2	27061.2	22199.4	22199.4	22199.4	22199.4	22199.4	22199.4	8277.76	8277.76	8277.76	8277.76	8277.76	8277.76	8277.76	8277.76	8277.76	8277.76	8277.76	8277.76	5769.34	5769.34	5769.34	5769.34	5769.34	5769.34	5769.34	5769.34	5769.34	5769.34	5769.34	5769.34	14980	14980	14980	14980	14980	14980	5541.16	5541.16	5541.16	5541.16	5541.16	5541.16
960		49285.6	50073	49777.7	48418.5	49955.2	49917.8	20448.4	20473.1	20749.8	21161.7	21110.4	20794.4	22402.4	23384.4	23730.7	22624.2	20943.5	21033.3	21468	21963.5	22160.9	21704.1	21595.6	22784.9	13475.3	13475.3	13475.3	13475.3	13475.3	13475.3	13475.3	13475.3	13475.3	13475.3	13475.3	13475.3	17300.5	17251	17566.5	17964.1	17395.7	17167.4	3242.83	3242.61	3235.8	3243.43	3249.65	3240.14
961		42817.4	44008.8	51578	54119.1	50288.5	49906.5	27714.8	26943	29530.9	30621.1	28868.8	27823.4	10422.6	9228.23	15771.8	19584.7	14756.5	12128.7	14465.9	12091	10692.2	20632.8	35154.7	24299.8	11359.6	11359.6	11359.6	11359.6	11359.6	11359.6	11359.6	11359.6	11359.6	11359.6	11359.6	11359.6	16033.8	16412.4	16484.7	16178.4	16876.4	16681.5	11725.2	11732.9	11787.7	11830.5	11775.4	11719.5
962		52689.7	46966.5	48979.6	57448.9	48877.7	45216.1	8058.68	8506.31	8524.27	9034.9	9039.51	8654.15	9981.03	9324.39	6002.61	5604.03	7053.07	8828.33	8475.5	10129.2	8784.83	6006.17	6353.75	5311.17	3261.26	3261.26	3261.26	3261.26	3261.26	3261.26	3261.26	3261.26	3261.26	3261.26	3261.26	3261.26	13250.9	14110.9	14883.7	14100.2	14411.7	14912.1	10272	10210.1	10234.3	10240.2	10276.3	10307.2
963		34270.5	34270.5	34270.5	34270.5	34270.5	34270.5	20286.3	20286.3	20286.3	20286.3	20286.3	20286.3	7564.39	7564.39	7564.39	7564.39	7564.39	7564.39	7564.39	7564.39	7564.39	7564.39	7564.39	7564.39	5272.15	5272.15	5272.15	5272.15	5272.15	5272.15	5272.15	5272.15	5272.15	5272.15	5272.15	5272.15	14153.3	14110.6	14392.2	14570.3	14385.3	14566.1	7815.59	7807.88	7807.77	7809.73	7808.42	7815.78
964		51887.1	51491.7	51226.1	51685.3	52574.5	52818.5	27892.1	27852.1	27818.4	27934.7	27644.9	27416.7	32437.3	32347.9	32066.7	32271.2	31970.6	32231.4	32044.2	31589	31587.7	32293.4	31620.3	31344.7	19044.1	19044.1	19044.1	19044.1	19044.1	19044.1	19044.1	19044.1	19044.1	19044.1	19044.1	19044.1	16550.5	16290.6	16644.7	16926.6	16417.5	15851.4	4968.55	4980.96	4976.24	4984.82	4986.94	4952.78
965		5600.1	5447.6	5465.96	5763.66	5944.96	5931.73	24617.1	24450.3	24028.5	22721.8	22214.3	23648.8	22417.9	22474	24310.8	29477.5	27100.7	24713	29708.7	22159	20385.3	25425.5	23315.1	20567.7	12803.6	12803.6	12803.6	12803.6	12803.6	12803.6	12803.6	12803.6	12803.6	12803.6	12803.6	12803.6	20577.4	20431.3	20342.4	21172	20556.8	19777.2	15131.1	15141	15075.7	15069	15130.9	15121.5
966		38162.7	38176.3	38152.6	38141.2	38161.1	38142.2	15881.2	15885.3	15888.1	15891.8	15883.1	15874.5	5952.33	5964.78	5970.3	5946.06	5938.35	5944.6	5943.6	5925.54	5973.31	6033.56	5984.97	5993.1	4167.87	4167.87	4167.87	4167.87	4167.87	4167.87	4167.87	4167.87	4167.87	4167.87	4167.87	4167.87	15245.8	15471.9	15955.7	15292.2	13945.4	13482.1	7825.52	7870.8	7907.31	7924.02	7928.56	7870.4
967		10120.6	10870.3	13271.3	11811.3	10955.8	11171.1	5536.71	6155.92	5818.01	5496.08	5667.22	5550.71	4023.14	4009.61	3912.65	4198.32	2501.26	3264.75	3206.01	2734.04	3962.73	6013.25	7155.73	5300.7	1887.05	1887.05	1887.05	1887.05	1887.05	1887.05	1887.05	1887.05	1887.05	1887.05	1887.05	1887.05	9393.49	9518.8	9015.33	8544.08	8739.97	8669.09	12217.5	12266.7	12281	12259.4	12235.1	12228.7
968		33305.1	33877.4	32574	33559.2	35916	33320.1	9544.45	10453.5	10258.4	9453.54	9586.26	9329.59	5234.93	5703.17	6163.32	6671.73	4994.72	5423.49	7377.55	5586.5	5649.93	5760.78	4807.15	5238.25	4026.11	4026.11	4026.11	4026.11	4026.11	4026.11	4026.11	4026.11	4026.11	4026.11	4026.11	4026.11	9470.94	9470.94	9470.94	9470.94	9470.94	9470.94	5366.07	5366.07	5366.07	5366.07	5366.07	5366.07
969		46659.8	43283	40892.2	41530.2	44584.6	49304.7	33694.6	31961	32267.7	31237.9	31830.5	34405.5	20701.4	23446.4	24321.7	15893.9	19001.2	23490.7	21013.8	21386.9	31009.7	36035	23159.7	15182.9	9115.63	9115.63	9115.63	9115.63	9115.63	9115.63	9115.63	9115.63	9115.63	9115.63	9115.63	9115.63	12915.2	12544.4	12704.4	13322.2	13533	13419.4	7450.69	7470.57	7484.66	7487.12	7535.24	7517.96
970		50013.2	51477.4	53432.7	52158.2	47029.1	51524.3	0.472179	0.435141	0.427175	0.42829	0.43309	0.450299	0.376296	0.2813	0.270535	0.263248	0.207518	0.227675	0.252088	0.298445	0.247862	0.221298	0.277967	0.318477	0.223887	0.223887	0.223887	0.223887	0.223887	0.223887	0.223887	0.223887	0.223887	0.223887	0.223887	0.223887	10840.9	10761.3	10713.8	10727.6	11027.9	11072.6	13288.8	13268.5	13256.3	13296.5	13252.4	13238.9
971		23386.4	23199.5	24815.2	25473.1	24822.3	23959.5	27024.4	27494.9	27392.7	28542	28384.1	27149.6	13342.2	18939.1	14902.2	13801.1	19088.1	14816.8	17449.8	15139.3	12615.4	15059.2	14560.7	14899.5	10400.3	10400.3	10400.3	10400.3	10400.3	10400.3	10400.3	10400.3	10400.3	10400.3	10400.3	10400.3	16302.9	16431.9	15923.1	15517.8	15359.3	15331.4	8001.31	8009.33	8007.72	8001.86	8009.37	8004.99
972		27167	26842.3	26729.6	28868.5	28346.4	27971.8	23898.5	22824.5	20615.5	20816.7	21835.3	21349.1	12177	13370.9	10541.2	10349.7	9341.87	10504.9	9510.51	7761.11	11246.1	14811.7	11653.8	12589	10757.9	10757.9	10757.9	10757.9	10757.9	10757.9	10757.9	10757.9	10757.9	10757.9	10757.9	10757.9	17499.1	16398	16273.5	17897	16808.4	16611.1	12258.4	12212.8	12193.4	12200.5	12165.4	12160.8
973		42270.4	42221.5	36597.5	34944.6	38275.5	39893.7	17853.1	18162.1	17571.6	17209.9	17962.3	16264.6	10528.9	14708.7	11720.5	11530.2	10837.2	11021.2	10310.4	13065.4	15280.6	15816.2	19775.6	14734.3	7770.12	7770.12	7770.12	7770.12	7770.12	7770.12	7770.12	7770.12	7770.12	7770.12	7770.12	7770.12	13137.7	13034.4	12248.6	12232.5	12874.5	13202.3	13441.1	13412.6	13438.4	13443.1	13403.7	13385.3
974		52449.8	47494.9	47380.4	56965.5	50692.7	45977.1	10856.4	11249.8	11988.2	11565.5	12338	12886.8	11620.9	9504.49	8468.72	9487.35	11302.6	6976.35	6120.67	5042.55	4511.99	5914.85	8498.41	12709.2	6411.51	6411.51	6411.51	6411.51	6411.51	6411.51	6411.51	6411.51	6411.51	6411.51	6411.51	6411.51	14990	14209.1	11920.5	12562.5	13279.3	13378.5	6047.44	5977.83	5955.1	6014.31	6017.08	6006.29
975		50412.2	46719.8	40486.4	41693.3	39671.9	38955.8	2092.98	2353.18	2287.16	2213.43	2178.25	2045.33	1749.1	1701.26	1243.12	1134.94	1352.45	1282.42	1276.01	1496.46	1387.89	1082.38	1436.77	1774.82	782.353	782.353	782.353	782.353	782.353	782.353	782.353	782.353	782.353	782.353	782.353	782.353	11775.8	11732.6	11839.6	12050.4	12269.8	12422	6518.91	6501.5	6487.75	6489.9	6485.94	6489.7
976		45470.5	47048.4	49940.8	48718.1	48663.5	50800	13140.6	12759.9	13190.4	13684.9	12769.2	11924.4	7116.05	7781.35	7930.8	10983.9	10802.5	8743.63	11287.6	11145.5	8591.65	7311.76	11406.5	14947.6	3787.51	3787.51	3787.51	3787.51	3787.51	3787.51	3787.51	3787.51	3787.51	3787.51	3787.51	3787.51	10052	10182.8	10044.7	9577.44	9275.11	9322.05	10805.2	10829.2	10817.6	10808.8	10827.6	10840.7
977		43484.3	43482	43176	42861.2	42331.9	42444.2	29738.6	29564	29186.4	29383.9	29786.7	29722.1	37431.3	37531.4	36010.4	35802	38414.6	39686.3	39951	39839.1	39661.5	38833.8	37701.4	38054.3	23107.9	23107.9	23107.9	23107.9	23107.9	23107.9	23107.9	23107.9	23107.9	23107.9	23107.9	23107.9	9761.43	9521.12	10257.5	10494.4	9797.56	10467	9257.61	9270.49	9274.51	9274.37	9296.83	9195.9
978		49347.2	41994.8	38921	41100.4	41692.1	52511.2	261.651	233.844	251.11	273.771	278.504	257.697	196.381	217.44	196.08	184.329	148.614	204.309	337.144	219.692	154.711	124.952	77.7593	90.0328	91.6268	91.6268	91.6268	91.6268	91.6268	91.6268	91.6268	91.6268	91.6268	91.6268	91.6268	91.6268	16532.7	16692.2	16850.6	16694.3	16841.4	17145	14170.4	14152.7	14129.2	14120.5	14103	14107.8
979		8928.5	8718.13	7777.46	8167.32	8769.37	9087.35	17939.8	17030	17273.3	17234.7	16590.5	16290.2	10332.4	8401.91	7541.05	9280.55	10688.2	9245.11	10681.5	13161.8	8623.63	7221.14	8436.96	7995.77	5557.22	5557.22	5557.22	5557.22	5557.22	5557.22	5557.22	5557.22	5557.22	5557.22	5557.22	5557.22	13626.4	13589.3	13544.6	13465.1	13984.6	13513.9	11697	11717.2	11700.1	11711.4	11696.2	11691.9
980		33778.8	32580.9	32314.2	32999.8	32498.6	32554	13142.4	13065.5	12981.2	13242.6	13252.6	13100.2	5299.69	5891.28	7383.89	6170.44	5291.47	6337.16	7488.26	7422.38	8283.59	5705.01	5228.34	6197.37	4057.05	4057.05	4057.05	4057.05	4057.05	4057.05	4057.05	4057.05	4057.05	4057.05	4057.05	4057.05	15783.7	17127.2	17480.1	17090.2	16462.4	15295.8	6840.1	6861.43	6846.1	6805.33	6807.63	6824.57
981		40849.9	41027.6	34929.9	34274.5	37633.3	37634.1	6952.48	6415.09	6596.1	7443.22	7551.55	7317.41	5350.69	6055.82	5723.69	8097.06	10899.9	6907.38	5143.53	4075.98	4750.76	4094.74	3187.82	4859.26	2146.5	2146.5	2146.5	2146.5	2146.5	2146.5	2146.5	2146.5	2146.5	2146.5	2146.5	2146.5	3737.14	3778.71	3764.97	3654.76	3678.33	3635.93	11780.1	11812.8	11761.2	11780.3	11863.9	11841.2
982		44079.6	44113.4	44244.5	44842.8	44786.2	41984	22645.6	23479.3	24559.4	24047.3	23638.7	23971.7	11296.2	10882	10839.2	13074.8	13735.6	12357.3	13347.7	11292.4	10963.3	10837.1	10999.3	14698.8	13366	13366	13366	13366	13366	13366	13366	13366	13366	13366	13366	13366	11792.6	11861.3	11811.1	11774.1	11547.1	11634.5	15212.9	15219.4	15189.7	15152.8	15222.9	15215.4
983		47889.4	48088.8	47574.4	47142.8	47806.2	47923.9	17994.8	18037.9	18045.1	17912.9	17793.3	17824.7	22366.7	22510.7	22177	22235.7	22434.5	22141.9	22146.9	22644.3	22263.5	21514.1	22308.9	22326.9	13247.2	13247.2	13247.2	13247.2	13247.2	13247.2	13247.2	13247.2	13247.2	13247.2	13247.2	13247.2	16583.8	16284.8	16420.1	16920	16669.3	16393	11749.3	11749.2	11727.8	11748.5	11760.7	11727.2
984		39401	37930.7	40703.9	41260.3	44414.4	45235.3	53130.1	57023.5	52965.2	55323.3	58222.4	51688	25978.5	25981.4	29205.5	33105.5	41682.8	44690.9	24965.3	27291	39152	49119.8	47320.4	34911.3	19990.7	19990.7	19990.7	19990.7	19990.7	19990.7	19990.7	19990.7	19990.7	19990.7	19990.7	19990.7	17900.1	17463.6	16957	17150.6	17649.9	18588.5	12327.1	12363.7	12371.6	12342.1	12369.1	12285.8
985		35813.2	35501.7	35684.5	36422.9	34149.6	33407.6	47294.6	46382.1	45821.2	47001.7	46126.7	45293.5	44545.6	45071	48534.7	49851.2	44552.5	45346.5	53626.1	52670.6	48671	56016.2	55303.8	49613.6	30595.8	30595.8	30595.8	30595.8	30595.8	30595.8	30595.8	30595.8	30595.8	30595.8	30595.8	30595.8	12374.4	12558	12363	11702.9	11873.8	12231.2	10678	10708	10732.6	10724.9	10732.5	10750.5
986		27032.2	29305.2	31728.4	28974.7	26637.9	25739.7	14593.1	15645.9	15227.3	14050.4	15153.7	15396.9	12067.8	13459.5	15205.3	15363.4	14727.7	15900.2	15495.7	13958.6	13220.1	15250.1	16649.2	14059.8	8590.81	8590.81	8590.81	8590.81	8590.81	8590.81	8590.81	8590.81	8590.81	8590.81	8590.81	8590.81	20545.7	20720.2	20527.9	20023.6	20538.5	20700.2	7241.27	7246.15	7248.79	7263.4	7255.61	7235.13
987		26751.1	24977.2	26494.2	28359.4	26718.1	28144.6	13812.2	12993.1	12981.3	13906.7	14624.5	13461.9	6163.19	6932.47	6090.28	8023.6	9722.83	7835.84	7065.53	8657.14	10211.9	9083.69	8024.62	10630.6	7330.37	7330.37	7330.37	7330.37	7330.37	7330.37	7330.37	7330.37	7330.37	7330.37	7330.37	7330.37	4426.87	4483.31	4588.16	4595.79	4742.51	4609.25	10328.2	10343.1	10359	10352.6	10340.1	10350.4
988		25068.8	26473.2	28041.7	28697.9	33725.9	32186.4	5777.71	5883.78	5896.81	5835.59	5402.49	4899.1	2180.04	2996.57	2724.66	2683.05	2861.44	4432.81	7584.57	5615.52	4534.89	6112.55	4601.37	4827.63	2371.04	2371.04	2371.04	2371.04	2371.04	2371.04	2371.04	2371.04	2371.04	2371.04	2371.04	2371.04	14840	15918.9	18502	18371.6	17209.2	17004.5	13276.7	13241.4	13235.9	13272.5	13216.6	13211.7
989		38953.8	40003.3	36061.5	34103	37072.9	40488.9	37655.6	35911.4	39827.5	36202.3	35158.1	38572.7	22305.9	17649.9	19786.7	22318.6	23761.3	25373.6	26441.1	28013	19673.8	18020.3	21308.4	29274.1	19954.7	19954.7	19954.7	19954.7	19954.7	19954.7	19954.7	19954.7	19954.7	19954.7	19954.7	19954.7	16612.2	16774.4	17125.8	16246.7	16697.1	17193.6	15765	15823	15943.3	15892.3	15861.9	15920.3
990		44634.9	44578	44820.7	45263.4	44790.4	44485.5	46545.5	46427.7	47043.1	47095.7	46975.4	46820.1	52940.4	52847.4	54184.2	54496.1	54287.9	54778.9	52480.3	52549.4	53667.5	54021.8	54286.9	53599	31832.5	31832.5	31832.5	31832.5	31832.5	31832.5	31832.5	31832.5	31832.5	31832.5	31832.5	31832.5	18158	18860.1	18561.3	17862.2	18170.9	17244.8	11289.7	11340.6	11304.3	11259.5	11293.6	11321.7
991		25881.8	25881.8	25881.8	25881.8	25881.8	25881.8	9426.93	9426.93	9426.93	9426.93	9426.93	9426.93	3515.13	3515.13	3515.13	3515.13	3515.13	3515.13	3515.13	3515.13	3515.13	3515.13	3515.13	3515.13	2449.94	2449.94	2449.94	2449.94	2449.94	2449.94	2449.94	2449.94	2449.94	2449.94	2449.94	2449.94	9455.22	9455.22	9455.22	9455.22	9455.22	9455.22	2069.11	2069.11	2069.11	2069.11	2069.11	2069.11
992		53215.5	56500.1	61725.6	60742.1	59556.3	61082.8	46429.7	44650	43358.8	43622.1	44744	44651.2	40139.1	34614.4	43164.9	47393	33620.3	32804.6	37005.6	36921.4	37394.3	38602.7	32266.1	33907.1	25292.5	25292.5	25292.5	25292.5	25292.5	25292.5	25292.5	25292.5	25292.5	25292.5	25292.5	25292.5	18749.7	19228.8	18491.3	18553.5	18579.7	16804.4	10859.7	10931.8	10952.4	10930.3	10879.8	10865.1
993		40032.9	39404.2	41015.9	50948.5	54210.5	40414.2	23978.2	27475.1	28127.1	25669.4	25860.4	25840.8	15950.8	17014.6	19426.1	21553.6	31359.5	25470.9	19878.5	22768.1	17565.8	19548.1	20885.6	16377.5	5318.1	5318.1	5318.1	5318.1	5318.1	5318.1	5318.1	5318.1	5318.1	5318.1	5318.1	5318.1	19862.8	19166.6	18998	20511.9	20789.6	19111.5	15645.2	15611.8	15713	15907.6	15829.8	15693.3
994		47469	47533.4	47923.8	47820.7	47664.3	47796.2	30929.2	30919.9	30890.4	30874.4	30941.9	30965	36628	36848.9	37025.4	36733.6	36813.4	36977.3	37295.3	37402.3	36909	36957.9	37428.2	36904.5	21633.6	21633.6	21633.6	21633.6	21633.6	21633.6	21633.6	21633.6	21633.6	21633.6	21633.6	21633.6	3996.87	4038.81	4068.09	4017.59	3983.37	3963.84	11988.9	11988.3	11998.9	12011.5	12008.7	12005.3
995		43671.5	41681.9	40438.9	40371.4	42013.7	40802.8	26845.7	27457.5	29330.5	30662.7	29774.6	29623.2	15007.6	14485.4	17038.4	19810	18197.5	14344.7	16593.1	22719.9	17553.9	19375.1	25907.6	15377.6	9881.78	9881.78	9881.78	9881.78	9881.78	9881.78	9881.78	9881.78	9881.78	9881.78	9881.78	9881.78	18894.9	19129.5	18886.6	18981.9	18211.1	16601.7	10073.4	10118.5	10123.7	10124.3	10123	10119.7
996		56478.5	54942.5	51126	48408.7	54048.3	59280	15800	17203.6	20038.2	16935	15404.9	18315.7	18004.6	13998.8	14979	9390.27	12277.4	16533.9	19041.1	22546.2	12348.9	12166.1	12217.8	7167.62	3740.58	3740.58	3740.58	3740.58	3740.58	3740.58	3740.58	3740.58	3740.58	3740.58	3740.58	3740.58	22036.4	20061.2	16925.1	17737.7	18839	19074.8	7897.16	7904.32	7915.02	7913.36	7916.81	7921.32
997		43257.7	43648	43853.4	44230.8	42604.7	44177.5	3428.85	3200.65	3004.13	3081.73	3174.17	3174.07	2049.88	1948.69	2422.74	2564.82	3550.04	2645.94	2065.93	2386.68	2468.37	3705.75	5033.92	3745.17	1588.45	1588.45	1588.45	1588.45	1588.45	1588.45	1588.45	1588.45	1588.45	1588.45	1588.45	1588.45	19747.9	20794.9	24037	23339.6	20590.3	20474.7	2799.36	2814.55	2829.74	2820.98	2815.45	2809.63
998		46214.8	46115.7	47106.1	45355.9	43998.7	45407.3	7364.71	7447.21	7566.12	7551.96	7832.36	7833.15	8384.22	8143.3	7757.42	9203.27	8666.63	7793.63	7384.45	7086.6	7632.3	8910.34	9060.71	8171.34	4833.28	4833.28	4833.28	4833.28	4833.28	4833.28	4833.28	4833.28	4833.28	4833.28	4833.28	4833.28	9616.45	9763.68	10358.4	9826.75	10229.6	10993	8343.4	8342.42	8363.95	8329.51	8324.39	8333
999		56209.2	57383.1	56937.8	54220.4	53418.2	53195.2	17510.1	18201	17910.8	17690.4	17712.4	18008.8	18312.8	17670.3	21023.3	19283.5	17880.5	18358.5	18927.7	17794.4	16861.1	19451.9	20969.2	19134.6	10803.3	10803.3	10803.3	10803.3	10803.3	10803.3	10803.3	10803.3	10803.3	10803.3	10803.3	10803.3	16245.6	16037	15761.7	15899.3	16231.6	16301.5	6148.68	6152.27	6148.55	6140.88	6138.56	6140.75
1000		59037.8	57347.1	57104.3	59842.9	61493.3	60325.9	42278.1	42324.3	41895.6	41095.5	41028.3	42323.8	46787.2	45779.1	44430	44107	42575.7	48001.9	51791.5	44275.5	43120	45542.6	46247.9	44760.1	25828.9	25828.9	25828.9	25828.9	25828.9	25828.9	25828.9	25828.9	25828.9	25828.9	25828.9	25828.9	14356.8	13795.2	12552.8	12449.7	12903	13463.5	3901.73	3893.16	3902.54	3917.19	3911.47	3902.5
Base Case/PE		42872.2	42872.2	42872.2	42872.2	42872.2	42872.2	22535.4	22535.4	22535.4	22535.4	22535.4	22535.4	16892.4	16892.4	16892.4	16892.4	16892.4	16892.4	16892.4	16892.4	16892.4	16892.4	16892.4	16892.4	10159.2	10159.2	10159.2	10159.2	10159.2	10159.2	10159.2	10159.2	10159.2	10159.2	10159.2	10159.2	14886.2	14886.2	14886.2	14886.2	14886.2	14886.2	8855.37	8855.37	8855.37	8855.37	8855.37	8855.37
[truncated: 276 more columns]
